# Supplementary material for: Towards tetrasubstituted furans through rearrangement and cyclodimerization of acetylenic ketones
Source: Royal Society of Chemistry journal article supplement (doi:10.1039/d3ob02036c), 2024-01-01
Supplement: d3ob02036c1.pdf [file d3ob02036c1.pdf]

## ***Supporting Information***

### **Towards tetrasubstituted furans through rearrangement and cyclodimerization of acetylenic ketones**

Zhenyun Dai, Chenyong Xu, Rongqiang Tian,\* Zheng Duan\*

*College of Chemistry, Green Catalysis Center, International Phosphorus Laboratory,  
International Joint Research Laboratory for Functional Organophosphorus  
Materials of Henan Province, Zhengzhou University, Zhengzhou 450001, P. R. China*

*\*E-mail: tianrq@zzu.edu.cn (R. Tian).*

*\*E-mail: duanzheng@zzu.edu.cn (Z. Duan).*

## Table of Contents

|                                                         |     |
|---------------------------------------------------------|-----|
| General Information.....                                | S3  |
| Experimental Procedures and Characterization Data ..... | S4  |
| Reference .....                                         | S17 |
| X-Ray Crystallographic Studies .....                    | S17 |
| NMR Spectra .....                                       | S26 |

## General Information

All reactions were performed under nitrogen using solvents dried by standard methods. Tetrahydrofuran (THF) were dried with sodium and distilled before use. Silica gel (200-300 mesh) were used for the chromatographic separations.  $^1\text{H}$ ,  $^{13}\text{C}$ ,  $^{11}\text{B}$  and  $^{31}\text{P}$  nuclear magnetic resonance (NMR) spectra were recorded on Bruker AV-300 (300 MHz) or AV-400 (400 MHz) spectrometer. All coupling constants ( $J$  values) were reported in hertz (Hz). Chemical shifts were expressed in parts per million (ppm) downfield from internal TMS ( $^1\text{H}$ ). High-resolution mass spectra (HRMS) were obtained with a Waters UPLC G2-XS Q-ToF mass spectrometer (ESI, positive mode). X-ray crystallographic analyses were performed on an Oxford diffraction Gemini E diffractometer. Melting Point: heating rate: 4 °C/min, the thermometer was not corrected. All commercially available reagents were used without further purification. 2-chloroethylphosphine  $\text{W}(\text{CO})_5$  complex was prepared according to literature method<sup>[1]</sup>. Acetylenic ketones were prepared according to literature method<sup>[2]</sup>. Borane diphenylphosphane and borane dicyclohexylphosphane were prepared according to literature method<sup>[3]</sup>. All new compounds were synthetic in small scale, and were purified by column chromatography or thin layer chromatography. The purities of the new compounds are acceptable according to NMR spectra analysis. Flammable gas was released when phosphine borane complex contact with water. The toxicity of compounds obtained in this work is unknown.

## Experimental Procedures and Characterization Data

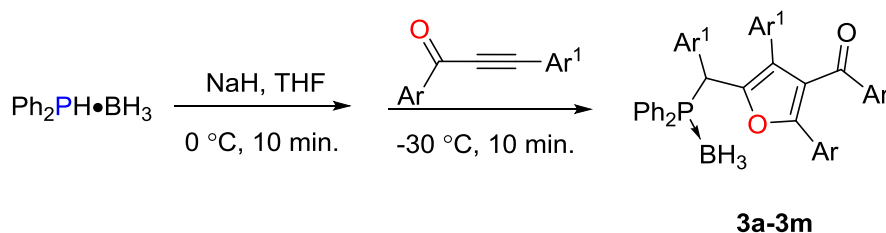

**General Procedures and Characterization of 3a to 3m:** NaH (9.6 mg, 0.24 mmol, 60% dispersion in mineral oil) was added to the solution of diphenylphosphane borane complex **1** (40 mg, 0.2 mmol) in THF (4 mL) at 0 °C. Then the mixture was stirred vigorously in an ice bath for 10 minutes. Acetylenic ketones (0.5 mmol) was added to the reaction mixture at -30 °C and kept the mixture for 10 minutes at -30 °C. Two drops of saturated aqueous NH<sub>4</sub>Cl was added to the mixture to quench the reaction. After filtration with a silica gel, crude product was obtained by rotary evaporation. The residue was purified by column chromatography on silica gel to afford the desired product.

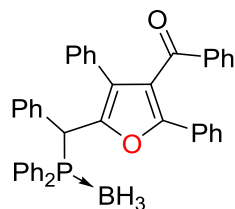

**3a:** 106.5 mg, 87% yield, yellow solid,  $R_f = 0.30$  (hexane/EtOAc = 15/1), **m.p.** 119.4-120.7 °C. <sup>31</sup>P NMR (121 MHz, CDCl<sub>3</sub>)  $\delta$  27.0; <sup>11</sup>B NMR (128 MHz, CDCl<sub>3</sub>)  $\delta$  -37.2; <sup>1</sup>H NMR (300 MHz, CDCl<sub>3</sub>)  $\delta$  7.67 – 7.59 (m, 4H), 7.58 – 7.53 (m, 3H), 7.51 – 7.41 (m, 7H), 7.39 – 7.29 (m, 8H), 7.27 – 7.19 (m, 6H), 6.94 – 6.88 (m, 2H), 5.15 (d,  $J = 15.8$  Hz, 1H), 1.13 – 0.44 (m, 3H). <sup>13</sup>C NMR (101 MHz, CDCl<sub>3</sub>)  $\delta$  193.1, 152.5, 146.03, 145.98, 137.2, 134.3, 133.4, 133.33, 133.26, 133.25, 133.2, 131.4, 131.2, 130.2, 130.1, 129.8, 129.2, 128.6, 128.6, 128.52, 128.49, 128.42, 128.38, 127.9, 127.84, 127.79, 127.72, 127.5, 127.3, 126.8, 126.7, 126.6, 121.1, 43.3, 43.1. **HRMS (ESI)** Calcd for C<sub>42</sub>H<sub>34</sub>BNaO<sub>2</sub>P [M+Na]<sup>+</sup> 635.2282, found 635.2292.

Gram scale experiment for synthesis of **3a**

NaH (6 mmol, 0.24 g) was added to the solution of diphenylphosphane borane



complex **1** (1.00 g, 5 mmol) in THF (20 mL) at 0 °C. Then the mixture was stirred vigorously in an ice bath for 10 minutes. Acetylenic ketone **2a** (2.58 g 12.5 mmol) was added to the reaction mixture at -30 °C and kept the mixture for 10 minutes at -30 °C. Saturated aqueous NH<sub>4</sub>Cl was added to the mixture to quench the reaction. After filtration with a silica gel, crude product was obtained by rotary evaporation. The residue was purified by column chromatography on silica gel to afford **3a** (2.98 g) in 80% yield.

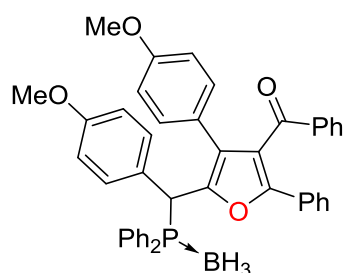

**3b**: 127.7 mg, 95% yield, yellow solid,  $R_f = 0.30$  (hexane/EtOAc = 5/1), **m.p.** 152.7-153.9 °C. <sup>31</sup>P NMR (121MHz, CDCl<sub>3</sub>)  $\delta$  26.4; <sup>11</sup>B NMR (128 MHz, CDCl<sub>3</sub>)  $\delta$  -38.2; <sup>1</sup>H NMR (300 MHz, CDCl<sub>3</sub>)  $\delta$  6.85 – 6.57 (m, 12H), 6.54 – 6.29 (m, 12H), 6.00 – 5.85 (m, 4H), 4.23 (d,  $J = 15.4$  Hz, 1H), 2.88 (s, 6H), 1.14 – 0.46 (m, 3H). <sup>13</sup>C NMR (75 MHz, CDCl<sub>3</sub>)  $\delta$  193.4, 159.2, 159.08, 152.06, 146.3, 146.2, 137.2, 135.2, 134.0, 133.6, 133.4, 133.29, 133.25, 133.2, 131.3, 130.4, 129.8, 129.5, 129.3, 128.6, 128.5, 128.2, 128.1, 127.5, 127.4, 126.5, 126.2, 126.13, 126.05, 123.4, 121.2, 114.5, 114.1, 113.9, 55.3, 55.2, 42.6, 42.2. **HRMS (ESI)** Calcd for C<sub>44</sub>H<sub>38</sub>BKO<sub>4</sub>P [M+K]<sup>+</sup> 711.2232, found 711.2233.

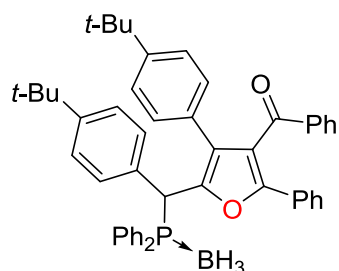

**3c**: 121.7 mg, 84% yield, yellow oil,  $R_f = 0.30$  (hexane/EtOAc = 10/1). <sup>31</sup>P NMR (121MHz, CDCl<sub>3</sub>)  $\delta$  26.9; <sup>11</sup>B NMR (128 MHz, CDCl<sub>3</sub>)  $\delta$  -37.6; <sup>1</sup>H NMR (400 MHz, CDCl<sub>3</sub>)  $\delta$  7.63 – 7.50 (m, 7H), 7.46 – 7.40 (m, 4H), 7.40 – 7.34 (m, 5H), 7.34 – 7.27 (m, 7H), 7.22 – 7.18 (m, 3H), 6.82 (d,  $J = 8.3$  Hz, 2H), 5.18 (d,  $J = 15.6$  Hz, 1H),

1.28 (d,  $J = 9.8$  Hz, 18H), 1.11 – 0.54 (m, 3H).  $^{13}\text{C}$  NMR (101 MHz,  $\text{CDCl}_3$ )  $\delta$  193.3, 152.3, 150.8, 150.7, 150.4, 146.14, 146.07, 137.4, 133.7, 133.53, 133.50, 133.42, 133.38, 133.3, 133.2, 133.1, 131.7, 131.24, 131.19, 129.9, 129.8, 129.3, 129.0, 128.9, 128.8, 128.6, 128.5, 128.4, 128.3, 128.1, 127.9, 127.4, 126.6, 126.5, 125.5, 125.4, 124.8, 121.2, 42.8, 42.4, 34.58, 34.57, 31.4, 31.3. HRMS (ESI) Calcd for  $\text{C}_{50}\text{H}_{50}\text{BNaO}_2\text{P}$   $[\text{M}+\text{Na}]^+$  747.3534, found 747.3548.

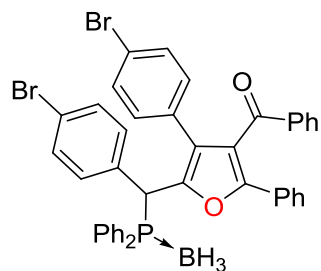

**3d:** 117.0 mg, 76% yield, yellow solid,  $R_f = 0.30$  (hexane/EtOAc = 10/1), **m.p.** 95.4–96.6 °C.  $^{31}\text{P}$  NMR (121MHz,  $\text{CDCl}_3$ )  $\delta$  26.3;  $^{11}\text{B}$  NMR (128 MHz,  $\text{CDCl}_3$ )  $\delta$  -38.1;  $^1\text{H}$  NMR (400 MHz,  $\text{CDCl}_3$ )  $\delta$  7.63 – 7.54 (m, 5H), 7.53 – 7.45 (m, 7H), 7.43 – 7.33 (m, 10H), 7.27 (s, 1H), 7.24 – 7.21 (m, 3H), 6.72 (d,  $J = 8.4$  Hz, 2H), 4.98 (d,  $J = 15.5$  Hz, 1H), 1.12 – 0.49 (m, 3H).  $^{13}\text{C}$  NMR (101 MHz,  $\text{CDCl}_3$ )  $\delta$  192.6, 152.9, 145.6, 145.6, 137.0, 133.7, 133.34, 133.25, 133.16, 133.1, 131.9, 131.8, 131.8, 131.7, 131.62, 131.58, 130.7, 130.0, 129.7, 128.82, 128.76, 128.7, 128.6, 128.5, 127.5, 127.2, 127.0, 126.6, 126.0, 125.9, 122.31, 122.28, 122.2, 120.8, 43.1, 42.8. HRMS (ESI) Calcd for  $\text{C}_{42}\text{H}_{32}\text{BBr}_2\text{NaO}_2\text{P}$   $[\text{M}+\text{Na}]^+$  793.0471, found 793.0487.

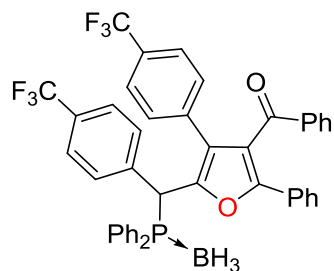

**3e:** 80.8 mg, 54% yield, yellow oil,  $R_f = 0.30$  (hexane/EtOAc = 10/1),  $^{31}\text{P}$  NMR (121MHz,  $\text{CDCl}_3$ )  $\delta$  27.0;  $^{11}\text{B}$  NMR (128 MHz,  $\text{CDCl}_3$ )  $\delta$  -38.8;  $^{19}\text{F}$  NMR (282 MHz,  $\text{CDCl}_3$ )  $\delta$  -63.45, -63.47;  $^1\text{H}$  NMR (300 MHz,  $\text{CDCl}_3$ )  $\delta$  7.65 – 7.57 (m, 4H), 7.55 – 7.45 (m, 13H), 7.45 – 7.32 (m, 6H), 7.28 (s, 2H), 7.23 (s, 1H), 6.96 (d,  $J = 7.9$  Hz, 2H), 5.09 (d,  $J = 15.4$  Hz, 1H), 1.22 – 0.54 (m, 3H).  $^{13}\text{C}$  NMR (75 MHz,  $\text{CDCl}_3$ )

$\delta$  192.3, 153.4, 145.5, 138.0, 136.9, 134.8, 133.8, 133.3, 133.17, 133.1, 133.0, 131.93, 131.90, 131.75, 131.72, 130.31, 130.26, 129.7, 129.4, 129.0, 128.8, 128.7, 128.66, 128.6, 127.3, 126.9, 126.8, 126.6, 126.2, 126.14, 126.06, 125.7, 125.64, 125.56, 125.54, 122.1, 120.8, 43.5, 43.2. **HRMS (ESI)** Calcd for  $C_{44}H_{32}BF_6NaO_2P$   $[M]^+$  711.2029, found 711.2050.

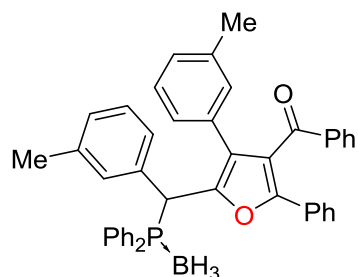

**3f**: 50.1 mg, 39% yield, yellow oil,  $R_f = 0.30$  (hexane/EtOAc = 10/1).  $^{31}P$  NMR (121MHz,  $CDCl_3$ )  $\delta$  26.5;  $^{11}B$  NMR (128 MHz,  $CDCl_3$ )  $\delta$  -39.3;  $^1H$  NMR (300 MHz,  $CDCl_3$ )  $\delta$  7.65 – 7.49 (m, 7H), 7.48 – 7.38 (m, 5H), 7.32 (s, 6H), 7.22 – 7.18 (m, 3H), 7.17 – 7.13 (m, 2H), 7.12 – 7.06 (m, 2H), 7.01 (d,  $J = 7.6$  Hz, 1H), 6.72 (d,  $J = 7.5$  Hz, 1H), 6.66 (s, 1H), 5.07 (d,  $J = 15.8$  Hz, 1H), 2.26 (s, 3H), 2.20 (s, 3H), 1.19 – 0.51 (m, 3H).  $^{13}C$  NMR (75 MHz,  $CDCl_3$ )  $\delta$  193.2, 152.3, 146.1, 146.0, 138.01, 137.98, 137.3, 134.1, 133.43, 133.39, 133.3, 133.2, 131.30, 131.27, 131.1, 131.0, 130.9, 130.1, 129.8, 129.3, 128.6, 128.5, 128.4, 128.33, 128.31, 127.9, 127.6, 127.3, 127.2, 126.8, 126.7, 126.5, 126.2, 121.1, 43.4, 43.0, 21.5, 21.3. **HRMS (ESI)** Calcd for  $C_{44}H_{38}BNaO_2P$   $[M+Na]^+$  663.2595, found 663.2596.

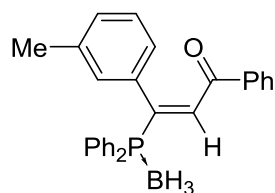

**3f'**

The use of 3-methylphenyl group provided **3f** in 39% yield, along with 54% (45.4 mg) Michael addition product **3f'**. Yellow oil,  $R_f = 0.30$  (hexane/EtOAc = 10/1).  $^{31}P$  NMR (121MHz,  $CDCl_3$ )  $\delta$  26.5;  $^{11}B$  NMR (128 MHz,  $CDCl_3$ )  $\delta$  -36.9;  $^1H$  NMR (300 MHz,  $CDCl_3$ )  $\delta$  7.81 – 7.75 (m, 2H), 7.74 – 7.65 (m, 4H), 7.52 – 7.32 (m, 9H), 7.26 (d,  $J = 6.8$  Hz, 1H), 6.94 – 6.84 (m, 2H), 6.76 (d,  $J = 7.1, 1.8$  Hz, 1H), 6.69 (s, 1H), 2.05 (s, 3H), 1.50 – 0.59 (m, 3H).  $^{13}C$  NMR (75 MHz,  $CDCl_3$ )  $\delta$  192.9, 192.7, 144.3,

143.8, 141.2, 141.0, 137.3, 136.5, 134.8, 134.7, 133.7, 133.6, 131.72, 131.69, 129.84, 129.80, 129.0, 128.93, 128.87, 128.7, 128.6, 127.7, 127.4, 126.6, 126.21, 126.16, 100.0, 21.18. **HRMS (ESI)** Calcd for  $C_{26}H_{28}BNaO_2P$   $[M+Na]^+$  442.1707, found 442.1722.

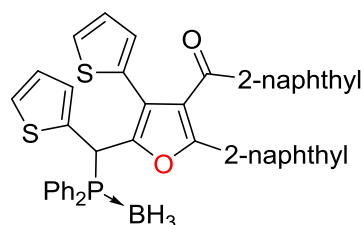

**3g:** 104.3 mg, 72% yield, yellow oil,  $R_f = 0.30$  (hexane/EtOAc = 5/1).  $^{31}P$  NMR (121MHz,  $CDCl_3$ )  $\delta$  29.7;  $^{11}B$  NMR (128 MHz,  $CDCl_3$ )  $\delta$  -38.6;  $^1H$  NMR (300 MHz,  $CDCl_3$ )  $\delta$  8.32 (s, 1H), 7.99 – 7.90 (m, 2H), 7.85 – 7.74 (m, 3H), 7.74 – 7.61 (m, 7H), 7.60 – 7.37 (m, 11H), 7.16 (dd,  $J = 8.8, 5.0$  Hz, 2H), 7.07 (s, 1H), 6.97 – 6.90 (m, 1H), 6.87 – 6.82 (m, 1H), 6.77 (s, 1H), 5.82 (d,  $J = 13.6$  Hz, 1H), 1.12 – 0.50 (m, 3H).  $^{13}C$  NMR (75 MHz,  $CDCl_3$ )  $\delta$  193.1, 151.8, 146.2, 146.1, 135.9, 135.5, 134.6, 134.0, 133.9, 133.11, 133.09, 133.07, 133.00, 132.9, 132.4, 131.91, 131.88, 131.6, 131.5, 131.17, 131.15, 130.0, 128.9, 128.8, 128.7, 128.62, 128.58, 128.5, 128.4, 128.0, 127.7, 127.63, 127.57, 127.4, 127.04, 127.02, 126.8, 126.7, 126.5, 126.43, 126.36, 126.1, 125.5, 124.4, 123.4, 121.7, 120.0, 39.2, 38.8. **HRMS (ESI)** Calcd for  $C_{46}H_{34}BNaO_2PS_2$   $[M+Na]^+$  747.1723, found 747.1744.

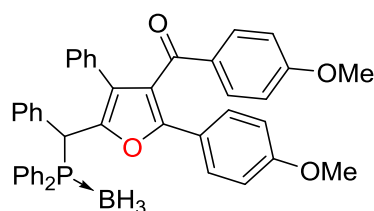

**3h:** 115.6 mg, 86% yield, yellow solid,  $R_f = 0.40$  (hexane/EtOAc = 10/1), **m.p.** 91.2-92.4 °C.  $^{31}P$  NMR (121MHz,  $CDCl_3$ )  $\delta$  26.4;  $^{11}B$  NMR (128 MHz,  $CDCl_3$ )  $\delta$  -38.0;  $^1H$  NMR (300 MHz,  $CDCl_3$ )  $\delta$  7.67 – 7.56 (m, 4H), 7.55 – 7.37 (m, 8H), 7.34 – 7.18 (m, 10H), 6.96 – 6.88 (m, 2H), 6.78 (d,  $J = 8.5$  Hz, 2H), 6.69 (d,  $J = 8.5$  Hz, 2H), 5.14 (d,  $J = 15.9$  Hz, 1H), 3.70 (s, 2H), 1.15 – 0.44 (m, 3H).  $^{13}C$  NMR (75 MHz,  $CDCl_3$ )  $\delta$  191.8, 163.9, 159.8, 152.1, 145.2, 145.2, 134.4, 133.3, 133.3, 133.2, 133.1, 132.3, 131.5, 130.4, 130.20, 130.15, 129.1, 128.7, 128.6, 128.51, 128.45, 128.2, 128.0,

127.8, 127.7, 127.5, 127.3, 126.73, 126.65, 122.2, 119.8, 114.1, 113.7, 55.5, 55.3, 43.4, 43.0. **HRMS (ESI)** Calcd for  $C_{44}H_{38}BKO_4P$   $[M+Na]^+$  711.2232, found 711.2241.

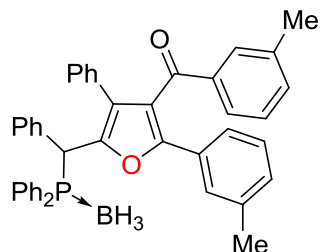

**3i:** 94.5 mg, 74% yield, yellow oil,  $R_f = 0.30$  (hexane/EtOAc = 10/1).  $^{31}P$  NMR (121MHz,  $CDCl_3$ )  $\delta$  26.8;  $^{11}B$  NMR (128 MHz,  $CDCl_3$ )  $\delta$  -39.2;  $^1H$  NMR (300 MHz,  $CDCl_3$ )  $\delta$  7.61 – 7.55 (m, 2H), 7.51 – 7.28 (m, 17H), 7.24 – 7.16 (m, 4H), 7.14 – 7.02 (m, 3H), 6.92-6.89 (m, 2H), 5.11 (d,  $J = 15.0$  Hz, 1H), 2.25 (d,  $J = 6.0$  Hz, 6H).  $^{13}C$  NMR (75 MHz,  $CDCl_3$ )  $\delta$  193.3, 152.8, 145.9, 138.1, 137.3, 134.4, 134.2, 133.4, 133.3, 131.4, 130.2, 130.1, 130.0, 129.4, 129.23, 129.17, 128.62, 128.57, 128.49, 128.45, 128.4, 128.3, 127.8, 127.7, 127.4, 127.2, 126.8, 123.9, 121.2, 43.5, 43.1, 21.5, 21.2. **HRMS (ESI)** Calcd for  $C_{44}H_{39}BO_2P$   $[M+H]^+$  641.2775, found 641.2775.

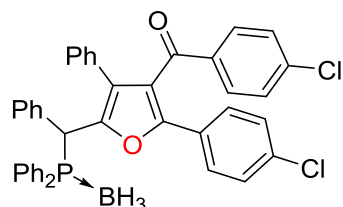

**3j:** 118.3 mg, 87% yield, yellow solid,  $R_f = 0.40$  (hexane/EtOAc = 10/1), **m.p.** 166.8-167 °C.  $^{31}P$  NMR (121MHz,  $CDCl_3$ )  $\delta$  26.4;  $^{11}B$  NMR (128 MHz,  $CDCl_3$ )  $\delta$  -38.5;  $^1H$  NMR (300 MHz,  $CDCl_3$ )  $\delta$  7.60 – 7.51 (m, 4H), 7.51 – 7.42 (m, 5H), 7.41 – 7.35 (m, 3H), 7.35 – 7.17 (m, 14H), 6.90 – 6.83 (m, 2H), 5.12 (d,  $J = 15.7$  Hz, 1H), 1.16 – 0.48 (m, 3H).  $^{13}C$  NMR (75 MHz,  $CDCl_3$ )  $\delta$  191.6, 151.5, 146.44, 146.38, 140.1, 135.4, 134.7, 134.0, 133.3, 133.20, 133.16, 133.1, 131.50, 131.47, 131.44, 131.41, 131.1, 130.8, 130.1, 130.0, 129.1, 129.0, 128.8, 128.7, 128.7, 128.6, 128.5, 128.4, 128.0, 127.83, 127.79, 127.7, 127.5, 127.1, 127.1, 126.7, 126.6, 121.0, 43.3, 43.0. **HRMS (ESI)** Calcd for  $C_{42}H_{32}BCl_2NaO_2P$   $[M+Na]^+$  703.1502, found 703.1516.

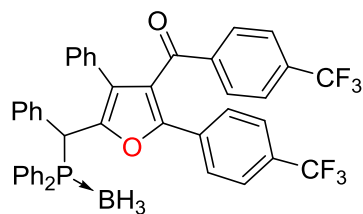

**3k:** 70.3 mg, 47% yield, yellow oil,  $R_f = 0.30$  (hexane/EtOAc = 10/1).  $^{31}\text{P}$  NMR (121MHz,  $\text{CDCl}_3$ )  $\delta$  27.7;  $^{11}\text{B}$  NMR (128 MHz,  $\text{CDCl}_3$ )  $\delta$  -38.1;  $^{19}\text{F}$  NMR (282 MHz,  $\text{CDCl}_3$ )  $\delta$  -63.2, -63.5;  $^1\text{H}$  NMR (300 MHz,  $\text{CDCl}_3$ )  $\delta$  7.73 – 7.64 (m, 4H), 7.60 – 7.52 (m, 4H), 7.50 – 7.43 (m, 6H), 7.42 – 7.27 (m, 10H), 7.24 – 7.20 (m, 2H), 6.91 – 6.84 (m, 2H), 5.14 (d,  $J = 15.6$  Hz, 1H), 1.17 – 0.66 (m, 3H).  $^{13}\text{C}$  NMR (101 MHz,  $\text{CDCl}_3$ )  $\delta$  191.7, 151.3, 147.3, 139.6, 134.9, 134.6, 133.9, 133.4, 133.3, 133.1, 133.0, 132.2, 131.61, 131.59, 131.52, 150.50, 130.6, 130.5, 130.3, 130.04, 130.00, 129.9, 129.2, 128.8, 128.7, 128.64, 128.57, 128.5, 128.2, 128.09, 128.07, 127.8, 127.5, 127.2, 127.0, 126.74, 126.68, 126.6, 125.8, 125.7, 125.53, 125.49, 122.5, 122.2, 122.0, 43.4, 43.1. **HRMS (ESI)** Calcd for  $\text{C}_{44}\text{H}_{32}\text{BF}_6\text{NaO}_2\text{P}$   $[\text{M}]^+$  771.2029, found 771.2019.

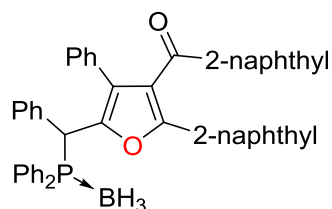

**3l:** 118.2 mg, 83% yield, yellow solid,  $R_f = 0.40$  (hexane/EtOAc = 5/1), **m.p.** 118.2-119.7 °C.  $^{31}\text{P}$  NMR (121MHz,  $\text{CDCl}_3$ )  $\delta$  27.1;  $^{11}\text{B}$  NMR (128 MHz,  $\text{CDCl}_3$ )  $\delta$  -37.9;  $^1\text{H}$  NMR (400 MHz,  $\text{CDCl}_3$ )  $\delta$  8.20 (s, 1H), 8.05 (s, 1H), 7.86 (d,  $J = 8.7$  Hz, 1H), 7.77 – 7.71 (m, 3H), 7.71 – 7.58 (m, 6H), 7.52 – 7.46 (m, 5H), 7.46 – 7.32 (m, 10H), 7.31 – 7.27 (m, 3H), 7.21 – 7.17 (m, 2H), 6.99 (d,  $J = 7.5$  Hz, 2H), 5.20 (d,  $J = 15.4$  Hz, 1H), 1.16 – 0.50 (m, 3H).  $^{13}\text{C}$  NMR (101 MHz,  $\text{CDCl}_3$ )  $\delta$  193.2, 152.3, 146.4, 146.3, 135.8, 134.7, 134.3, 133.5, 133.43, 133.40, 133.3, 133.1, 133.0, 132.6, 132.4, 131.5, 131.3, 130.19, 130.15, 129.8, 129.2, 128.74, 128.68, 128.6, 128.58, 128.55, 128.54, 128.51, 128.48, 128.3, 127.9, 127.8, 127.7, 127.6, 127.4, 127.1, 127.0, 126.7, 126.6, 126.5, 125.9, 124.6, 123.8, 121.7, 43.6, 43.3. **HRMS (ESI)** Calcd for  $\text{C}_{50}\text{H}_{39}\text{BO}_2\text{P}$   $[\text{M}+\text{H}]^+$  713.2775, found 713.2782.

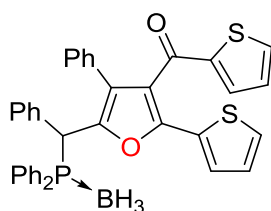

**3m:** 116.1 mg, 93% yield, yellow solid,  $R_f = 0.40$  (hexane/EtOAc = 10/1), **m.p.** 101.4-102.7 °C.  $^{31}\text{P}$  NMR (121 MHz,  $\text{CDCl}_3$ )  $\delta$  27.2;  $^{11}\text{B}$  NMR (128 MHz,  $\text{CDCl}_3$ )  $\delta$  -37.9;  $^1\text{H}$  NMR (300 MHz,  $\text{CDCl}_3$ )  $\delta$  7.62 – 7.53 (m, 3H), 7.51 – 7.40 (m, 5H), 7.41 – 7.25 (m, 13H), 7.15 (d, 1H), 7.02 – 6.95 (m, 3H), 6.82 – 6.77 (m, 1H), 5.14 (d,  $J = 15.1$  Hz, 1H), 1.10 – 0.50 (m, 3H).  $^{13}\text{C}$  NMR (75 MHz,  $\text{CDCl}_3$ )  $\delta$  183.8, 148.7, 145.72, 145.65, 144.3, 135.5, 135.0, 134.2, 133.4, 133.3, 133.2, 131.49, 131.46, 131.43, 131.40, 131.2, 131.1, 130.1, 130.0, 129.1, 128.8, 128.7, 128.5, 128.4, 128.0, 127.9, 127.6, 127.5, 127.2, 127.0, 126.8, 126.13, 126.06, 120.2, 43.4, 43.0. **HRMS (ESI)** Calcd for  $\text{C}_{38}\text{H}_{30}\text{BNaO}_2\text{PS}_2$   $[\text{M}+\text{Na}]^+$  647.1410, found 647.1427.

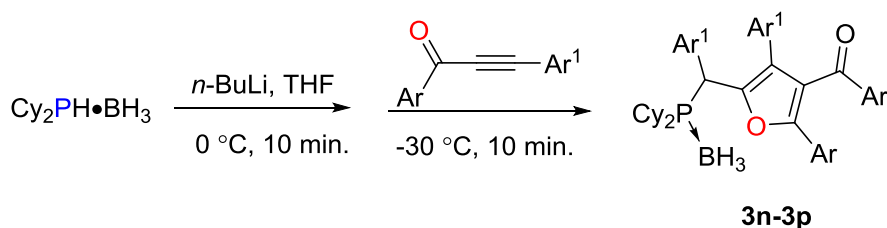

**General Procedures and Characterization of 3n to 3p:** A 10 mL Schlenk tube equipped with a stir bar and was charged sequentially with borane dicyclohexylphosphane complex (42 mg, 0.2 mmol) and THF (4 mL) under  $\text{N}_2$  atmosphere.  $n\text{-BuLi}$  (0.15 mL, 0.24 mmol) was added dropwise to the solution at 0 °C, and the solution was kept at 0 °C for 10 minutes. Then solution was cooled to -30 °C. Acetylenic ketones (0.5 mmol) was added to the reaction mixture at -30 °C, and the mixture was kept at -30 °C for 10 minutes. Two drops of saturated aqueous  $\text{NH}_4\text{Cl}$  was added to the mixture to quench the reaction. After filtration with a silica gel, crude product was obtained by rotary evaporation. The residue was purified by column chromatography on silica gel to afford the desired product.

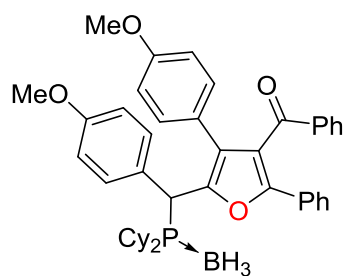

**3n**: 82.1 mg, 60% yield, yellow solid,  $R_f = 0.30$  (hexane/EtOAc = 8/1), **m.p.** 208.5-209.8 °C.  $^{31}\text{P}$  NMR (162MHz,  $\text{CDCl}_3$ )  $\delta$  38.5 ppm;  $^{11}\text{B}$  NMR (128 MHz,  $\text{CDCl}_3$ )  $\delta$  -41.8 ppm;  $^1\text{H}$  NMR (400 MHz,  $\text{CDCl}_3$ )  $\delta$  7.81 (d,  $J = 7.2$  Hz, 2H), 7.66 (d,  $J = 8.5$  Hz, 2H), 7.56 (d,  $J = 7.8$  Hz, 2H), 7.41 (t,  $J = 7.4$  Hz, 1H), 7.32 – 7.26 (m, 4H), 7.24 (d,  $J = 3.4$  Hz, 1H), 7.03 (d,  $J = 8.7$  Hz, 2H), 6.92 (d,  $J = 8.7$  Hz, 2H), 6.80 (d,  $J = 8.7$  Hz, 2H), 4.60 (d,  $J = 14.5$  Hz, 1H), 1.86 – 1.50 (m, 13H), 1.19 – 0.52 (m, 12H).  $^{13}\text{C}$  NMR (101 MHz,  $\text{CDCl}_3$ )  $\delta$  193.4, 159.1, 151.9, 147.51, 147.46, 137.3, 133.6, 130.8, 130.7, 130.4, 129.8, 129.5, 128.7, 128.5, 127.7, 126.6, 125.01, 124.96, 123.6, 121.6, 114.2, 114.1, 55.3, 55.2, 37.0, 36.8, 33.6, 33.3, 32.9, 32.6, 27.4, 27.32, 27.28, 27.2, 27.0, 26.0. **HRMS (ESI)** Calcd for  $\text{C}_{44}\text{H}_{51}\text{BO}_4\text{P}$   $[\text{M}+\text{H}]^+$  685.3613, found 685.3608. The single crystal of **3k** was grown from a mixture of dichloromethane and n-Hexane.

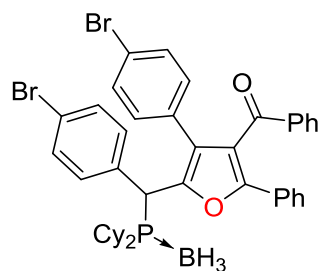

**3o**: 65.7 mg, 42% yield, yellow oil,  $R_f = 0.30$  (hexane/EtOAc = 8/1).  $^{31}\text{P}$  NMR (162MHz,  $\text{CDCl}_3$ )  $\delta$  40.2;  $^{11}\text{B}$  NMR (128 MHz,  $\text{CDCl}_3$ )  $\delta$  -41.8;  $^1\text{H}$  NMR (400 MHz,  $\text{CDCl}_3$ )  $\delta$  7.83 – 7.74 (m, 2H), 7.66 – 7.60 (m, 2H), 7.55 – 7.47 (m, 4H), 7.46 – 7.39 (m, 3H), 7.35 – 7.25 (m, 5H), 7.01 – 6.91 (m, 2H), 4.53 (d,  $J = 13.5$  Hz, 1H), 1.86 – 1.56 (m, 13H), 1.19 – 0.61 (m, 12H).  $^{13}\text{C}$  NMR (101 MHz,  $\text{CDCl}_3$ )  $\delta$  192.7, 152.7, 147.0, 146.9, 137.0, 134.7, 133.8, 132.0, 131.14, 131.11, 130.8, 130.2, 129.8, 129.1, 128.9, 128.8, 128.6, 126.7, 124.9, 124.8, 122.3, 122.09, 122.07, 121.3, 37.4, 37.2, 33.6, 33.4, 32.8, 32.5, 27.5, 27.3, 27.2, 27.2, 27.13, 27.09, 25.9. **HRMS (ESI)**



Calcd for C<sub>42</sub>H<sub>44</sub>BBr<sub>2</sub>NaO<sub>2</sub>P [M+Na]<sup>+</sup> 805.1410, found 805.1426.

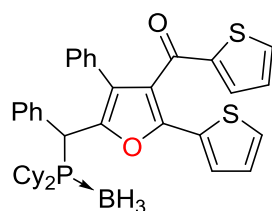

**3p**: 75.4 mg, 42% yield, yellow oil, *R*<sub>f</sub> = 0.40 (hexane/EtOAc = 8/1). <sup>31</sup>P NMR (121 MHz, CDCl<sub>3</sub>) δ 39.8; <sup>11</sup>B NMR (128 MHz, CDCl<sub>3</sub>) δ -41.9; <sup>1</sup>H NMR (300 MHz, CDCl<sub>3</sub>) δ 7.59 (d, *J* = 7.7 Hz, 2H), 7.54 (d, *J* = 4.9 Hz, 1H), 7.46 (d, *J* = 3.0 Hz, 2H), 7.42 – 7.32 (m, 6H), 7.28 (s, 1H), 7.16 (d, *J* = 7.8 Hz, 2H), 7.05 – 7.00 (m, 1H), 6.88 – 6.83 (m, 1H), 4.70 (d, *J* = 13.7 Hz, 1H), 1.88 – 1.54 (m, 12H), 1.24 – 0.51 (m, 13H). <sup>13</sup>C NMR (101 MHz, CDCl<sub>3</sub>) δ 183.9, 148.3, 147.1, 147.0, 144.3, 135.7, 135.5, 135.1, 131.4, 131.3, 129.4, 129.4, 129.0, 128.8, 128.2, 127.9, 127.7, 127.7, 126.9, 126.6, 125.2, 125.2, 120.7, 37.9, 37.6, 33.4, 33.1, 32.3, 32.1, 27.3, 27.3, 27.2, 27.1, 27.0, 26.0. HRMS (ESI) Calcd for C<sub>38</sub>H<sub>42</sub>BNaO<sub>2</sub>PS<sub>2</sub> [M+Na]<sup>+</sup> 659.2349, found 659.2356.

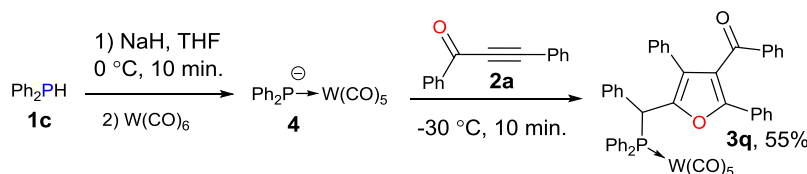

NaH (12 mg, 0.3 mmol, 60% dispersion in mineral oil) was added to the solution of diphenylphosphane (45 μL, 0.25 mmol) in THF (4 mL) at 0 °C. Then the mixture was stirred vigorously in an ice bath for 5 minutes. W(CO)<sub>6</sub> was added (88 mg, 0.25 mmol) to the reaction for 30 minutes, affording compound **4**. Acetylenic ketones (129 mg, 0.625 mmol) was added to the reaction mixture at -30 °C, and the solution was kept at -30 °C for 10 minutes. Two drops of saturated aqueous NH<sub>4</sub>Cl was added to the mixture to quench the reaction. After filtration with silica gel, crude product was obtained by rotary evaporation. The residue was purified by column chromatography on silica gel to afford **3q**.

**3q**: 126.8 mg, 55% yield, yellow oil, *R*<sub>f</sub> = 0.30 (hexane/EtOAc = 8/1). <sup>31</sup>P NMR (162 MHz, CDCl<sub>3</sub>) δ 31.8 (*J*<sub>PW</sub> = 247.9 Hz). <sup>1</sup>H NMR (400 MHz, CDCl<sub>3</sub>) δ 7.68 – 7.64 (m,

2H), 7.63 – 7.56 (m, 2H), 7.50 – 7.38 (m, 3H), 7.38 – 7.30 (m, 3H), 7.30 – 7.25 (m, 8H), 7.23 – 7.14 (m, 10H), 7.13 – 7.07 (m, 2H), 5.40 (d,  $J = 7.8$  Hz, 1H).  $^{13}\text{C}$  NMR (101 MHz,  $\text{CDCl}_3$ )  $\delta$  199.5, 199.3, 196.53, 196.47, 193.3, 151.92, 151.90, 147.4, 147.3, 137.2, 135.97, 135.95, 135.4, 135.03, 134.98, 134.9, 133.5, 133.1, 132.7, 132.6, 132.50, 131.45, 130.83, 130.81, 130.50, 130.45, 130.0, 129.8, 129.5, 129.2, 128.8, 128.5, 128.4, 128.34, 128.29, 128.3, 128.20, 128.16, 128.00, 127.96, 127.0, 126.9, 126.3, 121.8, 47.5, 47.4. HRMS (ESI) Calcd for  $\text{C}_{47}\text{H}_{32}\text{O}_7\text{PW}$   $[\text{M}+\text{H}]^+$  923.1389, found 923.1402.

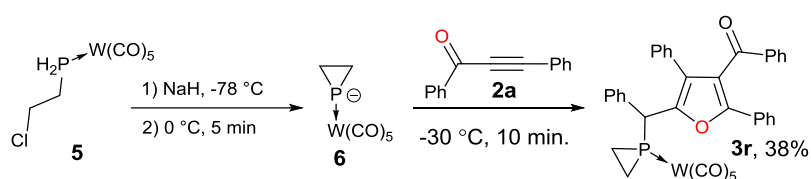

$\text{NaH}$  (20 mg, 0.5 mmol, 60% dispersion in mineral oil) was added to the solution of 2-chloroethylphosphine  $\text{W}(\text{CO})_5$  complex **5** (84 mg, 0.2 mmol) in THF (4 mL) at  $-78$  °C. Then the mixture was stirred vigorously in an ice bath for 5 minutes, affording compound **6**. Acetylenic ketones (103 mg, 0.5 mmol) was added to the reaction mixture at  $-30$  °C and kept the mixture for 10 minutes at  $-30$  °C. Two drops of saturated aqueous  $\text{NH}_4\text{Cl}$  was added to the mixture to quench the reaction. After filtration with a silica gel, crude product was obtained by rotary evaporation. The residue was purified by column chromatography on silica gel to afford **3r**.

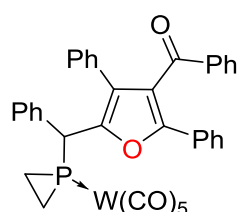

**3r**: 38% yield, yellow oil,  $R_f = 0.40$  (hexane/EtOAc = 10/1).  $^{31}\text{P}$  NMR (121 MHz,  $\text{CDCl}_3$ )  $\delta$  -175.6 ( $J_{\text{PW}} = 258.4$  Hz);  $^1\text{H}$  NMR (300 MHz,  $\text{CDCl}_3$ )  $\delta$  7.77 (d,  $J = 7.3$  Hz, 2H), 7.61 – 7.52 (m, 2H), 7.46 – 7.35 (m, 6H), 7.33 – 7.26 (m, 4H), 7.24 – 7.18 (m, 4H), 7.12 – 7.04 (m, 2H), 4.44 (d,  $J = 7.8$  Hz, 1H), 1.56 – 1.36 (m, 2H), 1.22 – 1.04 (m, 2H).  $^{13}\text{C}$  NMR (75 MHz,  $\text{CDCl}_3$ )  $\delta$  197.6, 197.1, 195.2, 195.1, 192.8, 152.8, 146.7, 146.6, 137.1, 136.0, 133.5, 130.7, 129.8, 129.3, 129.1, 129.0, 128.93, 128.85,

128.6, 128.4, 128.2, 128.1, 127.9, 127.04, 126.97, 126.6, 122.1, 44.7, 44.6, 8.1, 8.0.

**HRMS (ESI)** Calcd for C<sub>37</sub>H<sub>26</sub>O<sub>7</sub>PW [M+H]<sup>+</sup> 797.0920, found 797.0926.

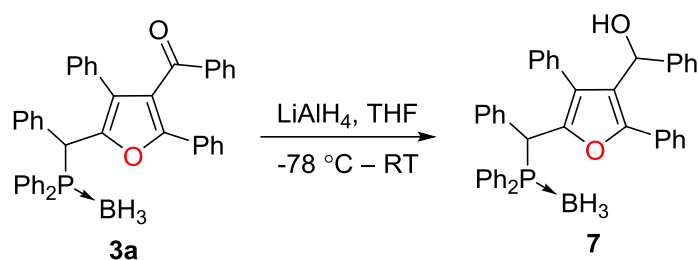

A 10 mL Schlenk tube equipped with a stir bar was charged sequentially with **3a** (61 mg, 0.1 mmol) and THF (3 mL) under N<sub>2</sub> atmosphere. LiAlH<sub>4</sub> (46 mg, 0.12 mmol) was added at -78 °C, and the mixture kept at -78 °C for 30 minutes. Then the solution was slowly warmed to room temperature. After filtration with silica gel, crude product was obtained by rotary evaporation. The residue was purified by column chromatography on silica gel to afford a pair of diastereoisomers **7** and **7'** as a yellow oil mixture (**7** : **7'** = 1 : 0.55, the ratio was determined by <sup>1</sup>H NMR).

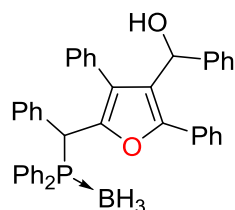

**7, 7'**: 55.3 mg, 90% yield, **7** and **7'** were isolated as a mixture. Yellow oil, R<sub>f</sub> = 0.30 (hexane/EtOAc = 8/1). <sup>31</sup>P NMR (121 MHz, CDCl<sub>3</sub>) δ 21.8; <sup>11</sup>B NMR (128 MHz, CDCl<sub>3</sub>) δ -38.3; <sup>1</sup>H NMR (300 MHz, CDCl<sub>3</sub>) δ 7.68 (d, *J* = 7.3 Hz, 1.29H, 7+7'), 7.61 – 7.50 (m, 5.71H, 7+7'), 7.48 – 7.37 (m, 8.14H, 7+7'), 7.37 – 7.27 (m, 11.71H, 7+7'), 7.26 – 7.20 (m, 9.71H, 7+7'), 7.19 – 7.08 (m, 7.42H, 7+7'), 6.77 (d, *J* = 6.7 Hz, 1.09H, 7'), 6.60 (d, *J* = 7.3 Hz, 1.99H, 7), 6.00 (s, 0.99H, 7), 5.87 (s, 0.54H, 7'), 4.93 (d, *J* = 16.0 Hz, 0.55H, 7'), 4.87 (d, *J* = 15.4 Hz, 1H, 7). <sup>13</sup>C NMR (101 MHz, CDCl<sub>3</sub>) δ 151.2, 151.1, 150.56, 150.55, 146.8, 146.7, 145.91, 145.86, 143.2, 142.0, 134.8, 133.7, 133.62, 133.57, 133.5, 133.44, 133.37, 133.3, 132.2, 131.9, 131.38, 131.36, 131.32, 131.29, 130.4, 130.28, 130.25, 130.22, 130.17, 128.8, 128.6, 128.51, 128.48, 128.45, 128.3, 128.1, 128.0, 127.9, 127.83, 127.75, 127.7, 127.6, 127.5, 127.3, 127.1, 126.9, 126.4, 126.2, 125.9, 125.8, 122.7, 68.5, 67.9, 43.6, 43.5, 43.4, 43.2. **HRMS**

(ESI) Calcd for  $C_{42}H_{36}BNaO_2P$   $[M+Na]^+$  637.2438, found 637.2455.

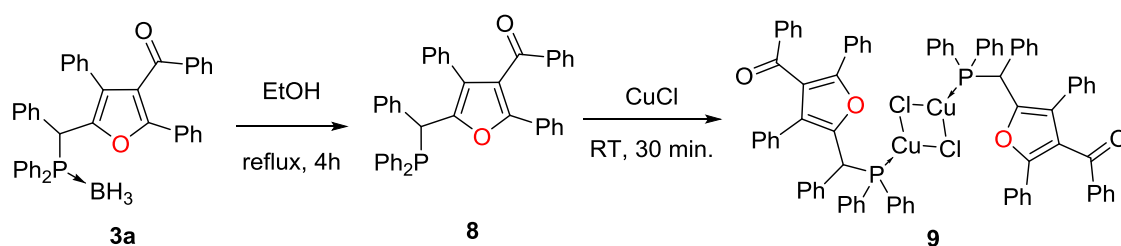

A solution of **3a** (21 mg, 0.03 mmol) in EtOH (3 mL) was refluxed for 4 h. Crude product **8** was obtained by rotary evaporation. CuCl (3 mg, 0.03 mmol) was added to a solution of **8** in  $CH_2Cl_2$ . The mixture was stirred at room temperature for 30 minutes. After filtration and rotary evaporation, **9** was obtained as yellow solid in 97 % yield (20.2 mg).

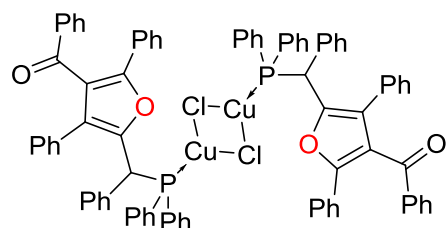

**9**: m.p. 112.2-113.7 °C.  $^{31}P$  NMR (162 MHz,  $CDCl_3$ )  $\delta$  11.1;  $^1H$  NMR (300 MHz,  $CDCl_3$ )  $\delta$  7.77 (d,  $J = 7.6$  Hz, 4H), 7.70 – 7.52 (m, 12H), 7.46 – 7.34 (m, 10H), 7.34 – 7.16 (m, 24H), 7.16 – 7.09 (m, 4H), 7.08 – 6.99 (m, 2H), 6.89 – 6.81 (m, 4H), 5.00 (d,  $J = 13.8$  Hz, 2H). HRMS (ESI) Calcd for  $C_{84}H_{63}Cl_2Cu_2O_4P_2$   $[M+H]^+$  1393.2165, found 1393.2181. The single crystal of **9** was grown from a mixture of dichloromethane and *n*-hexane.

## Reference

- [1] Y. Hao, C. Zhang, Y. Mei, R. Tian, Z. Duan, F. Mathey, *Dalton Trans.*, 2016, **45**, 8284.
- [2] a) J. Sweet, S. Rajkumar, P. Dingwall, P. Knipe, *Eur. J. Org. Chem.*, 2021, 3980. b) A. S. Sharma, V. S. Sharma, H. Kaur, *ACS Appl. Nano Mater.*, 2020, **3**, 1191; c) S. Santra, K. Dhara, P. Ranjan, P. Bera, J. Dash, K. S. Mandal, *Green Chem.*, 2011, **13**, 3238; d) M. Zhang, X. Wang, *Angew. Chem. Int. Ed.*, 2021, **60**, 17185; e) X. Hu, B. Zhou, H. Jin, Y. Liu, L. Zhang, *Chem. Commun.*, 2020, **56**, 7297; f) L. Zhang, Y. Chu, P. Ma, S. Zhao, Q. Li, B. Chen, X. Hong, J. Sun, *Org. Biomol. Chem.*, 2020, **18**, 1073.
- [3] N. T. Coles, M. F. Mahon, R. L. Webster, *Organometallics* 2017, **36**, 2262.

## X-Ray Crystallographic Studies

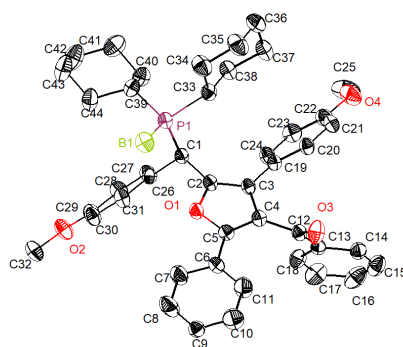

**Figure S1.** X-ray crystal structures of **3n** (CCDC 2239712, thermal ellipsoids shown at 30% probability level).

**Table S1.** Crystal data and structure refinement for **3n**.

| Identification code | <b>3n</b>                                         |
|---------------------|---------------------------------------------------|
| Empirical formula   | C <sub>44</sub> H <sub>50</sub> BO <sub>4</sub> P |
| Formula weight      | 684.62                                            |
| Temperature/K       | 300.00                                            |
| Crystal system      | orthorhombic                                      |
| Space group         | P2 <sub>1</sub> 2 <sub>1</sub> 2 <sub>1</sub>     |
| a/Å                 | 10.982(2)                                         |
| b/Å                 | 15.999(3)                                         |
| c/Å                 | 21.423(4)                                         |

|                                                |                                                                        |
|------------------------------------------------|------------------------------------------------------------------------|
| $\alpha/^\circ$                                | 90.00(3)                                                               |
| $\beta/^\circ$                                 | 90.00(3)                                                               |
| $\gamma/^\circ$                                | 90.00(3)                                                               |
| Volume/ $\text{\AA}^3$                         | 3764.2(12)                                                             |
| Z                                              | 4                                                                      |
| $\rho_{\text{calc}}/\text{cm}^3$               | 1.208                                                                  |
| $\mu/\text{mm}^{-1}$                           | 0.115                                                                  |
| F(000)                                         | 1464.0                                                                 |
| Crystal size/ $\text{mm}^3$                    | 0.12 $\times$ 0.11 $\times$ 0.13                                       |
| Radiation                                      | Mo K $\alpha$ ( $\lambda = 0.71073$ )                                  |
| 2 $\Theta$ range for data collection/ $^\circ$ | 4.168 to 49.99                                                         |
| Index ranges                                   | -12 $\leq$ h $\leq$ 13, -19 $\leq$ k $\leq$ 19, -25 $\leq$ l $\leq$ 25 |
| Reflections collected                          | 58243                                                                  |
| Independent reflections                        | 6619 [R <sub>int</sub> = 0.0958, R <sub>sigma</sub> = 0.0752]          |
| Data/restraints/parameters                     | 6619/0/451                                                             |
| Goodness-of-fit on F <sup>2</sup>              | 1.031                                                                  |
| Final R indexes [I $\geq$ 2 $\sigma$ (I)]      | R <sub>1</sub> = 0.0465, wR <sub>2</sub> = 0.1068                      |
| Final R indexes [all data]                     | R <sub>1</sub> = 0.0666, wR <sub>2</sub> = 0.1182                      |
| Largest diff. peak/hole / e $\text{\AA}^{-3}$  | 0.14/-0.17                                                             |
| Flack parameter                                | -0.02(8)                                                               |

**Table S2. Bond Lengths for 3n.**

| Atom | Atom | Length/ $\text{\AA}$ | Atom | Atom | Length/ $\text{\AA}$ |
|------|------|----------------------|------|------|----------------------|
| P1   | C1   | 1.859(4)             | C29  | C28  | 1.387(6)             |
| P1   | C33  | 1.846(4)             | C29  | C30  | 1.377(6)             |
| P1   | C39  | 1.826(4)             | C6   | C7   | 1.370(6)             |
| P1   | B1   | 1.938(5)             | C6   | C11  | 1.360(6)             |
| O1   | C5   | 1.362(5)             | C22  | C23  | 1.365(7)             |
| O1   | C2   | 1.371(4)             | C22  | C21  | 1.375(6)             |
| O2   | C29  | 1.369(5)             | C20  | C21  | 1.373(5)             |
| O2   | C32  | 1.420(5)             | C27  | C28  | 1.364(6)             |
| O3   | C12  | 1.224(5)             | C33  | C38  | 1.524(5)             |
| O4   | C22  | 1.368(5)             | C33  | C34  | 1.520(6)             |
| O4   | C25  | 1.418(7)             | C14  | C15  | 1.359(6)             |
| C19  | C24  | 1.382(5)             | C18  | C17  | 1.366(6)             |
| C19  | C20  | 1.389(5)             | C39  | C40  | 1.511(6)             |
| C19  | C3   | 1.468(5)             | C39  | C44  | 1.511(6)             |
| C5   | C4   | 1.360(5)             | C38  | C37  | 1.522(6)             |
| C5   | C6   | 1.456(5)             | C15  | C16  | 1.360(8)             |

| Atom | Atom | Length/Å | Atom | Atom | Length/Å |
|------|------|----------|------|------|----------|
| C12  | C4   | 1.480(5) | C9   | C8   | 1.357(8) |
| C12  | C13  | 1.475(5) | C9   | C10  | 1.348(7) |
| C26  | C1   | 1.526(5) | C40  | C41  | 1.510(6) |
| C26  | C31  | 1.377(5) | C17  | C16  | 1.372(8) |
| C26  | C27  | 1.388(5) | C37  | C36  | 1.492(7) |
| C4   | C3   | 1.441(5) | C34  | C35  | 1.526(7) |
| C1   | C2   | 1.490(5) | C44  | C43  | 1.521(7) |
| C13  | C14  | 1.394(6) | C7   | C8   | 1.367(7) |
| C13  | C18  | 1.381(6) | C36  | C35  | 1.511(8) |
| C31  | C30  | 1.390(6) | C11  | C10  | 1.381(6) |
| C2   | C3   | 1.353(5) | C41  | C42  | 1.485(8) |
| C24  | C23  | 1.390(6) | C43  | C42  | 1.498(8) |

**Table S3. Bond Angles for 3n.**

| Atom | Atom | Atom | Angle/°    | Atom | Atom | Atom | Angle/°  |
|------|------|------|------------|------|------|------|----------|
| C1   | P1   | B1   | 115.3(2)   | C11  | C6   | C7   | 116.6(4) |
| C33  | P1   | C1   | 104.16(18) | O4   | C22  | C21  | 115.0(4) |
| C33  | P1   | B1   | 109.5(2)   | C23  | C22  | O4   | 125.1(4) |
| C39  | P1   | C1   | 106.82(19) | C23  | C22  | C21  | 119.9(4) |
| C39  | P1   | C33  | 107.1(2)   | C21  | C20  | C19  | 120.9(4) |
| C39  | P1   | B1   | 113.3(2)   | C4   | C3   | C19  | 126.9(3) |
| C5   | O1   | C2   | 107.9(3)   | C2   | C3   | C19  | 127.7(3) |
| C29  | O2   | C32  | 117.2(3)   | C2   | C3   | C4   | 105.4(3) |
| C22  | O4   | C25  | 117.1(4)   | C28  | C27  | C26  | 121.3(4) |
| C24  | C19  | C20  | 117.8(3)   | C27  | C28  | C29  | 120.7(4) |
| C24  | C19  | C3   | 121.3(3)   | C29  | C30  | C31  | 119.7(4) |
| C20  | C19  | C3   | 120.9(3)   | C22  | C23  | C24  | 119.7(4) |
| O1   | C5   | C6   | 115.0(3)   | C38  | C33  | P1   | 118.5(3) |
| C4   | C5   | O1   | 108.9(3)   | C34  | C33  | P1   | 110.6(3) |
| C4   | C5   | C6   | 136.0(4)   | C34  | C33  | C38  | 110.4(4) |
| O3   | C12  | C4   | 121.5(4)   | C15  | C14  | C13  | 120.4(5) |
| O3   | C12  | C13  | 120.7(4)   | C17  | C18  | C13  | 120.4(4) |
| C13  | C12  | C4   | 117.8(3)   | C20  | C21  | C22  | 120.4(4) |
| C31  | C26  | C1   | 122.5(3)   | C40  | C39  | P1   | 117.1(3) |
| C31  | C26  | C27  | 117.8(3)   | C44  | C39  | P1   | 114.4(3) |
| C27  | C26  | C1   | 119.8(3)   | C44  | C39  | C40  | 109.8(4) |
| C5   | C4   | C12  | 129.4(3)   | C37  | C38  | C33  | 110.8(4) |
| C5   | C4   | C3   | 107.5(3)   | C14  | C15  | C16  | 119.9(5) |

| Atom | Atom | Atom | Angle/°  | Atom | Atom | Atom | Angle/°  |
|------|------|------|----------|------|------|------|----------|
| C3   | C4   | C12  | 123.1(3) | C10  | C9   | C8   | 117.9(5) |
| C26  | C1   | P1   | 115.3(2) | C41  | C40  | C39  | 112.2(4) |
| C2   | C1   | P1   | 111.3(3) | C18  | C17  | C16  | 119.6(5) |
| C2   | C1   | C26  | 112.4(3) | C36  | C37  | C38  | 111.7(4) |
| C14  | C13  | C12  | 119.1(4) | C15  | C16  | C17  | 121.0(5) |
| C18  | C13  | C12  | 122.0(3) | C33  | C34  | C35  | 112.3(4) |
| C18  | C13  | C14  | 118.8(4) | C39  | C44  | C43  | 111.7(5) |
| C26  | C31  | C30  | 121.5(4) | C8   | C7   | C6   | 121.7(5) |
| O1   | C2   | C1   | 116.8(3) | C37  | C36  | C35  | 109.4(4) |
| C3   | C2   | O1   | 110.3(3) | C9   | C8   | C7   | 121.1(5) |
| C3   | C2   | C1   | 132.9(3) | C6   | C11  | C10  | 121.5(5) |
| C19  | C24  | C23  | 121.2(4) | C42  | C41  | C40  | 111.7(5) |
| O2   | C29  | C28  | 116.1(4) | C9   | C10  | C11  | 121.2(5) |
| O2   | C29  | C30  | 124.9(4) | C42  | C43  | C44  | 111.5(5) |
| C30  | C29  | C28  | 119.0(4) | C41  | C42  | C43  | 111.2(5) |
| C7   | C6   | C5   | 121.1(4) | C36  | C35  | C34  | 111.2(5) |
| C11  | C6   | C5   | 122.3(4) |      |      |      |          |

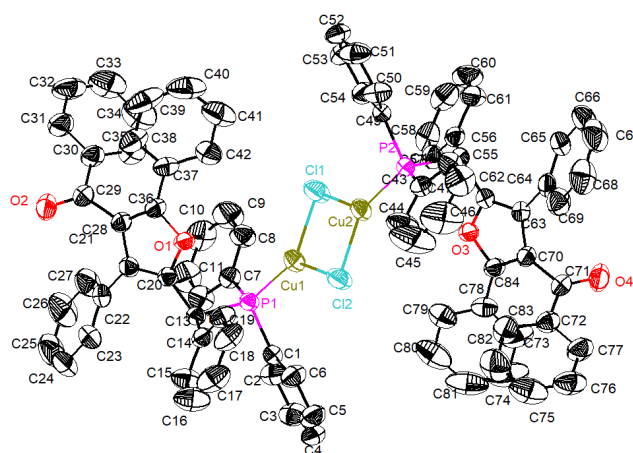

**Figure S2.** X-ray crystal structures of **9** (CCDC 2239716, thermal ellipsoids shown at 30% probability level).

**Table S4.** Crystal data and structure refinement for **9**.

|                     |                              |
|---------------------|------------------------------|
| Identification code | <b>9</b>                     |
| Empirical formula   | $C_{84}H_{62}Cl_2Cu_2O_4P_2$ |
| Formula weight      | 1395.370                     |
| Temperature/K       | 299.00                       |



|                                             |                                                                |
|---------------------------------------------|----------------------------------------------------------------|
| Crystal system                              | monoclinic                                                     |
| Space group                                 | P2 <sub>1</sub> /c                                             |
| a/Å                                         | 20.6011(3)                                                     |
| b/Å                                         | 21.4880(4)                                                     |
| c/Å                                         | 16.3102(3)                                                     |
| α/°                                         | 90                                                             |
| β/°                                         | 105.866(1)                                                     |
| γ/°                                         | 90                                                             |
| Volume/Å <sup>3</sup>                       | 6945.1(2)                                                      |
| Z                                           | 4                                                              |
| ρ <sub>calc</sub> /cm <sup>3</sup>          | 1.335                                                          |
| μ/mm <sup>-1</sup>                          | 0.787                                                          |
| F(000)                                      | 2886.3                                                         |
| Crystal size/mm <sup>3</sup>                | 0.184 × 0.11 × 0.13                                            |
| Radiation                                   | Mo Kα (λ = 0.71073)                                            |
| 2θ range for data collection/°              | 4.6 to 50                                                      |
| Index ranges                                | -26 ≤ h ≤ 26, -27 ≤ k ≤ 27, -19 ≤ l ≤ 21                       |
| Reflections collected                       | 147072                                                         |
| Independent reflections                     | 12224 [R <sub>int</sub> = 0.0458, R <sub>sigma</sub> = 0.0256] |
| Data/restraints/parameters                  | 12224/0/847                                                    |
| Goodness-of-fit on F <sup>2</sup>           | 1.069                                                          |
| Final R indexes [I ≥ 2σ (I)]                | R <sub>1</sub> = 0.0389, wR <sub>2</sub> = 0.1175              |
| Final R indexes [all data]                  | R <sub>1</sub> = 0.0479, wR <sub>2</sub> = 0.1282              |
| Largest diff. peak/hole / e Å <sup>-3</sup> | 0.60/-0.66                                                     |

**Table S5. Bond Lengths for 9.**

| Atom | Atom | Length/Å  | Atom | Atom | Length/Å |
|------|------|-----------|------|------|----------|
| Cl2  | Cu2  | 2.2815(7) | C49  | C50  | 1.383(4) |
| Cl2  | Cu1  | 2.3061(8) | C54  | C53  | 1.394(4) |
| Cl1  | Cu2  | 2.2837(8) | C40  | C41  | 1.368(7) |
| Cl1  | Cu1  | 2.2974(8) | C40  | C39  | 1.340(7) |
| Cu2  | Cu1  | 2.9384(4) | C70  | C63  | 1.444(3) |
| Cu2  | P2   | 2.1692(6) | C70  | C84  | 1.356(4) |
| Cu1  | P1   | 2.1733(6) | C70  | C71  | 1.493(3) |
| O1   | C20  | 1.378(3)  | C53  | C52  | 1.364(5) |
| O1   | C36  | 1.371(3)  | C47  | C48  | 1.370(4) |
| O3   | C62  | 1.373(3)  | C47  | C46  | 1.339(6) |
| O3   | C84  | 1.373(3)  | C13  | C14  | 1.513(3) |
| O2   | C29  | 1.210(3)  | C13  | C20  | 1.487(3) |

| Atom | Atom | Length/Å | Atom | Atom | Length/Å |
|------|------|----------|------|------|----------|
| O4   | C71  | 1.211(3) | C15  | C14  | 1.383(4) |
| P1   | C13  | 1.887(2) | C15  | C16  | 1.400(5) |
| P1   | C7   | 1.822(2) | C41  | C42  | 1.378(4) |
| P1   | C1   | 1.827(2) | C63  | C64  | 1.477(4) |
| P2   | C49  | 1.832(2) | C66  | C67  | 1.353(6) |
| P2   | C43  | 1.831(2) | C66  | C65  | 1.395(4) |
| P2   | C55  | 1.882(2) | C68  | C69  | 1.388(5) |
| C72  | C73  | 1.376(4) | C68  | C67  | 1.368(6) |
| C72  | C77  | 1.388(4) | C7   | C8   | 1.382(4) |
| C72  | C71  | 1.487(4) | C7   | C12  | 1.389(4) |
| C62  | C63  | 1.366(3) | C2   | C1   | 1.382(4) |
| C62  | C55  | 1.488(3) | C2   | C3   | 1.387(4) |
| C23  | C24  | 1.405(5) | C26  | C27  | 1.383(5) |
| C23  | C22  | 1.387(4) | C26  | C25  | 1.357(6) |
| C30  | C31  | 1.383(4) | C39  | C38  | 1.396(5) |
| C30  | C35  | 1.386(4) | C43  | C48  | 1.385(4) |
| C30  | C29  | 1.488(4) | C43  | C44  | 1.375(4) |
| C51  | C50  | 1.380(4) | C18  | C17  | 1.359(5) |
| C51  | C52  | 1.369(5) | C74  | C75  | 1.375(6) |
| C19  | C14  | 1.380(4) | C1   | C6   | 1.388(4) |
| C19  | C18  | 1.387(4) | C16  | C17  | 1.364(6) |
| C57  | C56  | 1.377(4) | C21  | C20  | 1.353(3) |
| C57  | C58  | 1.388(4) | C21  | C28  | 1.446(3) |
| C5   | C4   | 1.376(5) | C21  | C22  | 1.475(3) |
| C5   | C6   | 1.382(4) | C56  | C55  | 1.519(3) |
| C4   | C3   | 1.370(5) | C82  | C83  | 1.384(5) |
| C61  | C60  | 1.402(5) | C77  | C76  | 1.374(5) |
| C61  | C56  | 1.385(4) | C46  | C45  | 1.379(6) |
| C11  | C10  | 1.371(5) | C28  | C36  | 1.358(4) |
| C11  | C12  | 1.387(4) | C28  | C29  | 1.490(3) |
| C10  | C9   | 1.360(5) | C58  | C59  | 1.358(5) |
| C31  | C32  | 1.388(5) | C45  | C44  | 1.384(5) |
| C73  | C74  | 1.396(5) | C84  | C78  | 1.463(4) |
| C81  | C80  | 1.378(7) | C69  | C64  | 1.388(4) |
| C81  | C82  | 1.356(7) | C64  | C65  | 1.382(4) |
| C35  | C34  | 1.388(5) | C27  | C22  | 1.381(4) |
| C32  | C33  | 1.346(6) | C38  | C37  | 1.381(4) |
| C33  | C34  | 1.351(6) | C36  | C37  | 1.462(4) |
| C80  | C79  | 1.395(5) | C79  | C78  | 1.376(4) |

| Atom | Atom | Length/Å | Atom | Atom | Length/Å |
|------|------|----------|------|------|----------|
| C9   | C8   | 1.384(4) | C42  | C37  | 1.378(4) |
| C24  | C25  | 1.348(6) | C76  | C75  | 1.331(6) |
| C60  | C59  | 1.360(5) | C83  | C78  | 1.386(4) |
| C49  | C54  | 1.380(4) |      |      |          |

**Table S6. Bond Angles for 9.**

| Atom | Atom | Atom | Angle/°    | Atom | Atom | Atom | Angle/°    |
|------|------|------|------------|------|------|------|------------|
| Cu1  | Cl2  | Cu2  | 79.66(3)   | C25  | C26  | C27  | 120.4(4)   |
| Cu1  | Cl1  | Cu2  | 79.79(3)   | C13  | C14  | C19  | 122.3(2)   |
| Cl1  | Cu2  | Cl2  | 100.85(3)  | C15  | C14  | C19  | 118.5(3)   |
| Cu1  | Cu2  | Cl2  | 50.54(2)   | C15  | C14  | C13  | 119.2(2)   |
| Cu1  | Cu2  | Cl1  | 50.308(19) | C7   | C8   | C9   | 120.6(3)   |
| P2   | Cu2  | Cl2  | 131.73(3)  | C38  | C39  | C40  | 120.9(4)   |
| P2   | Cu2  | Cl1  | 127.09(3)  | C48  | C43  | P2   | 124.4(2)   |
| P2   | Cu2  | Cu1  | 174.42(2)  | C44  | C43  | P2   | 116.7(2)   |
| Cl1  | Cu1  | Cl2  | 99.70(3)   | C44  | C43  | C48  | 118.9(3)   |
| Cu2  | Cu1  | Cl2  | 49.804(18) | C17  | C18  | C19  | 120.3(3)   |
| Cu2  | Cu1  | Cl1  | 49.90(2)   | C75  | C74  | C73  | 119.8(4)   |
| P1   | Cu1  | Cl2  | 129.21(3)  | C2   | C1   | P1   | 124.63(19) |
| P1   | Cu1  | Cl1  | 130.73(3)  | C6   | C1   | P1   | 116.54(19) |
| P1   | Cu1  | Cu2  | 175.18(2)  | C6   | C1   | C2   | 118.8(2)   |
| C36  | O1   | C20  | 107.05(18) | C43  | C48  | C47  | 121.1(3)   |
| C84  | O3   | C62  | 107.41(18) | C17  | C16  | C15  | 120.5(3)   |
| C13  | P1   | Cu1  | 117.90(7)  | C28  | C21  | C20  | 105.6(2)   |
| C7   | P1   | Cu1  | 113.71(8)  | C22  | C21  | C20  | 127.3(2)   |
| C7   | P1   | C13  | 100.94(11) | C22  | C21  | C28  | 127.0(2)   |
| C1   | P1   | Cu1  | 111.22(8)  | C7   | C12  | C11  | 120.2(3)   |
| C1   | P1   | C13  | 103.23(10) | C33  | C34  | C35  | 120.5(4)   |
| C1   | P1   | C7   | 108.82(11) | C61  | C56  | C57  | 118.7(2)   |
| C49  | P2   | Cu2  | 110.64(7)  | C55  | C56  | C57  | 122.3(2)   |
| C43  | P2   | Cu2  | 114.73(8)  | C55  | C56  | C61  | 119.0(2)   |
| C43  | P2   | C49  | 106.93(11) | C2   | C3   | C4   | 120.9(3)   |
| C55  | P2   | Cu2  | 116.61(8)  | C83  | C82  | C81  | 119.9(4)   |
| C55  | P2   | C49  | 104.87(10) | C13  | C20  | O1   | 116.09(19) |
| C55  | P2   | C43  | 102.07(11) | C21  | C20  | O1   | 110.6(2)   |
| C77  | C72  | C73  | 118.1(3)   | C21  | C20  | C13  | 133.1(2)   |
| C71  | C72  | C73  | 122.9(2)   | C76  | C77  | C72  | 121.2(3)   |
| C71  | C72  | C77  | 119.0(3)   | C45  | C46  | C47  | 120.0(3)   |

| Atom | Atom | Atom | Angle/°    | Atom | Atom | Atom | Angle/°    |
|------|------|------|------------|------|------|------|------------|
| C63  | C62  | O3   | 110.2(2)   | C36  | C28  | C21  | 107.1(2)   |
| C55  | C62  | O3   | 116.56(19) | C29  | C28  | C21  | 126.4(2)   |
| C55  | C62  | C63  | 133.0(2)   | C29  | C28  | C36  | 126.5(2)   |
| C22  | C23  | C24  | 119.6(3)   | C59  | C58  | C57  | 120.3(3)   |
| C35  | C30  | C31  | 118.8(3)   | C44  | C45  | C46  | 120.8(4)   |
| C29  | C30  | C31  | 119.9(3)   | C70  | C84  | O3   | 109.6(2)   |
| C29  | C30  | C35  | 121.3(3)   | C78  | C84  | O3   | 116.7(2)   |
| C52  | C51  | C50  | 120.1(3)   | C78  | C84  | C70  | 133.7(2)   |
| C18  | C19  | C14  | 120.9(3)   | C64  | C69  | C68  | 120.6(3)   |
| C58  | C57  | C56  | 120.8(3)   | C69  | C64  | C63  | 120.4(3)   |
| C6   | C5   | C4   | 119.9(3)   | C65  | C64  | C63  | 121.5(3)   |
| C3   | C4   | C5   | 119.6(3)   | C65  | C64  | C69  | 118.1(3)   |
| C56  | C61  | C60  | 119.6(3)   | C22  | C27  | C26  | 120.8(3)   |
| C12  | C11  | C10  | 119.8(3)   | C21  | C22  | C23  | 121.1(2)   |
| C9   | C10  | C11  | 120.7(3)   | C27  | C22  | C23  | 118.3(3)   |
| C32  | C31  | C30  | 119.5(4)   | C27  | C22  | C21  | 120.6(2)   |
| C74  | C73  | C72  | 119.9(3)   | C16  | C17  | C18  | 119.9(3)   |
| C82  | C81  | C80  | 120.8(4)   | C62  | C55  | P2   | 108.24(15) |
| C34  | C35  | C30  | 119.8(4)   | C56  | C55  | P2   | 111.20(16) |
| C33  | C32  | C31  | 121.0(4)   | C56  | C55  | C62  | 115.5(2)   |
| C34  | C33  | C32  | 120.3(4)   | C37  | C38  | C39  | 119.2(4)   |
| C79  | C80  | C81  | 119.6(4)   | C28  | C36  | O1   | 109.6(2)   |
| C8   | C9   | C10  | 119.9(3)   | C37  | C36  | O1   | 116.6(2)   |
| C25  | C24  | C23  | 120.7(3)   | C37  | C36  | C28  | 133.8(2)   |
| C59  | C60  | C61  | 120.6(3)   | C68  | C67  | C66  | 120.1(3)   |
| C54  | C49  | P2   | 123.11(19) | C49  | C50  | C51  | 120.9(3)   |
| C50  | C49  | P2   | 117.92(19) | C78  | C79  | C80  | 119.9(4)   |
| C50  | C49  | C54  | 118.7(2)   | C53  | C52  | C51  | 119.8(3)   |
| C53  | C54  | C49  | 119.9(3)   | C58  | C59  | C60  | 120.0(3)   |
| C39  | C40  | C41  | 120.4(4)   | C30  | C29  | O2   | 121.8(2)   |
| C84  | C70  | C63  | 107.3(2)   | C28  | C29  | O2   | 120.8(2)   |
| C71  | C70  | C63  | 125.3(2)   | C28  | C29  | C30  | 117.4(2)   |
| C71  | C70  | C84  | 127.4(2)   | C37  | C42  | C41  | 120.5(3)   |
| C52  | C53  | C54  | 120.6(3)   | C1   | C6   | C5   | 120.8(3)   |
| C46  | C47  | C48  | 120.2(3)   | C45  | C44  | C43  | 119.1(3)   |
| C14  | C13  | P1   | 112.54(16) | C36  | C37  | C38  | 120.5(3)   |
| C20  | C13  | P1   | 108.96(15) | C42  | C37  | C38  | 119.1(3)   |
| C20  | C13  | C14  | 114.27(19) | C42  | C37  | C36  | 120.4(3)   |
| C16  | C15  | C14  | 119.9(3)   | C26  | C25  | C24  | 120.2(3)   |

| Atom | Atom | Atom | Angle/°  | Atom | Atom | Atom | Angle/°  |
|------|------|------|----------|------|------|------|----------|
| C42  | C41  | C40  | 119.9(4) | C64  | C65  | C66  | 120.6(3) |
| C70  | C63  | C62  | 105.5(2) | C75  | C76  | C77  | 120.3(4) |
| C64  | C63  | C62  | 127.1(2) | C72  | C71  | O4   | 121.4(2) |
| C64  | C63  | C70  | 127.3(2) | C70  | C71  | O4   | 120.4(2) |
| C65  | C66  | C67  | 120.4(4) | C70  | C71  | C72  | 118.2(2) |
| C67  | C68  | C69  | 120.3(4) | C78  | C83  | C82  | 120.5(4) |
| C8   | C7   | P1   | 117.3(2) | C79  | C78  | C84  | 120.9(3) |
| C12  | C7   | P1   | 123.9(2) | C83  | C78  | C84  | 119.7(3) |
| C12  | C7   | C8   | 118.7(2) | C83  | C78  | C79  | 119.4(3) |
| C3   | C2   | C1   | 119.9(3) | C76  | C75  | C74  | 120.6(3) |

## NMR Spectra

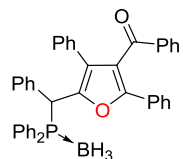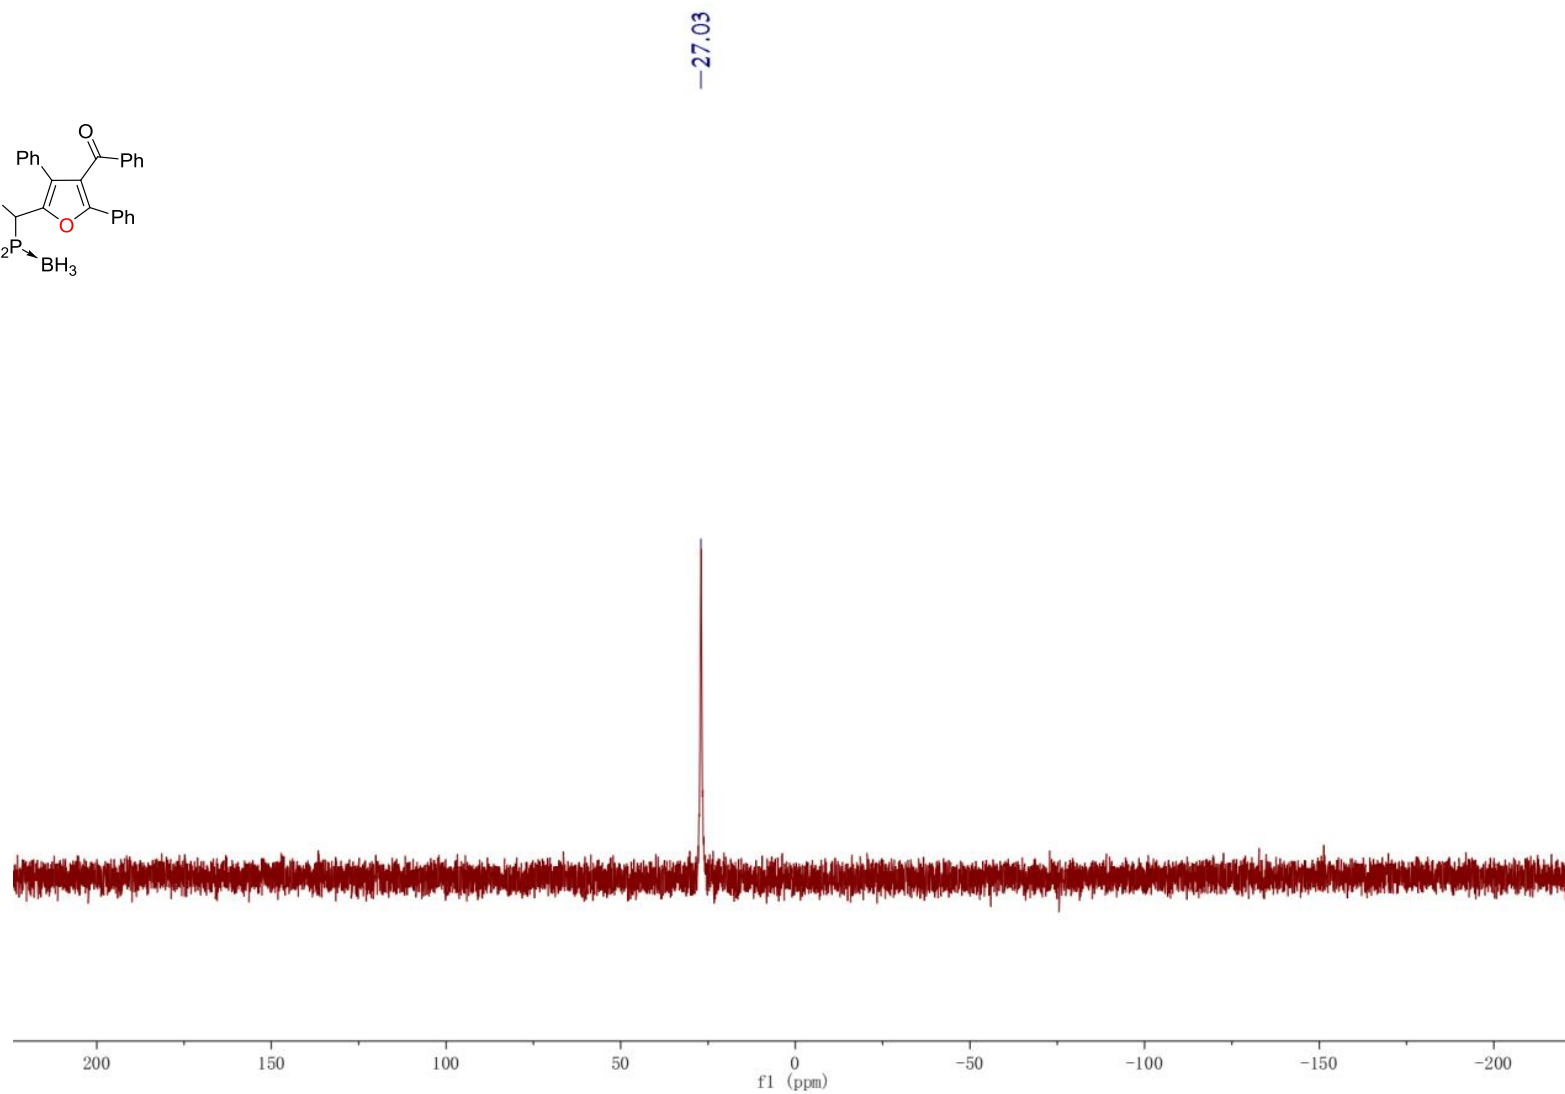

<sup>31</sup>P {<sup>1</sup>H} NMR (CDCl<sub>3</sub>, 121 MHz) of compound **3a**

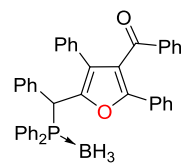

—-37.20

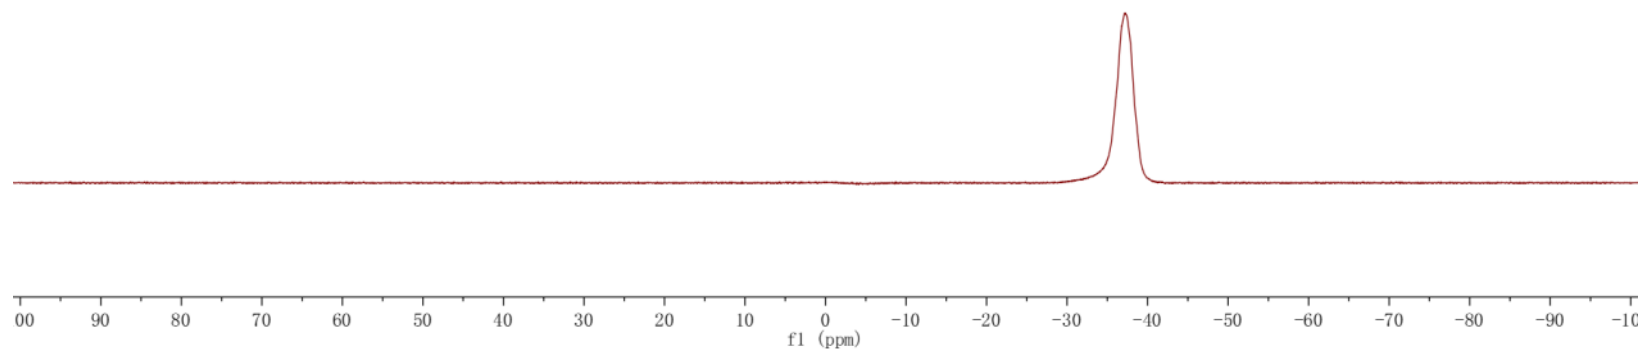

$^{11}\text{B}$  { $^1\text{H}$ } NMR ( $\text{CDCl}_3$ , 128 MHz) of compound **3a**

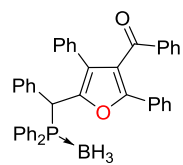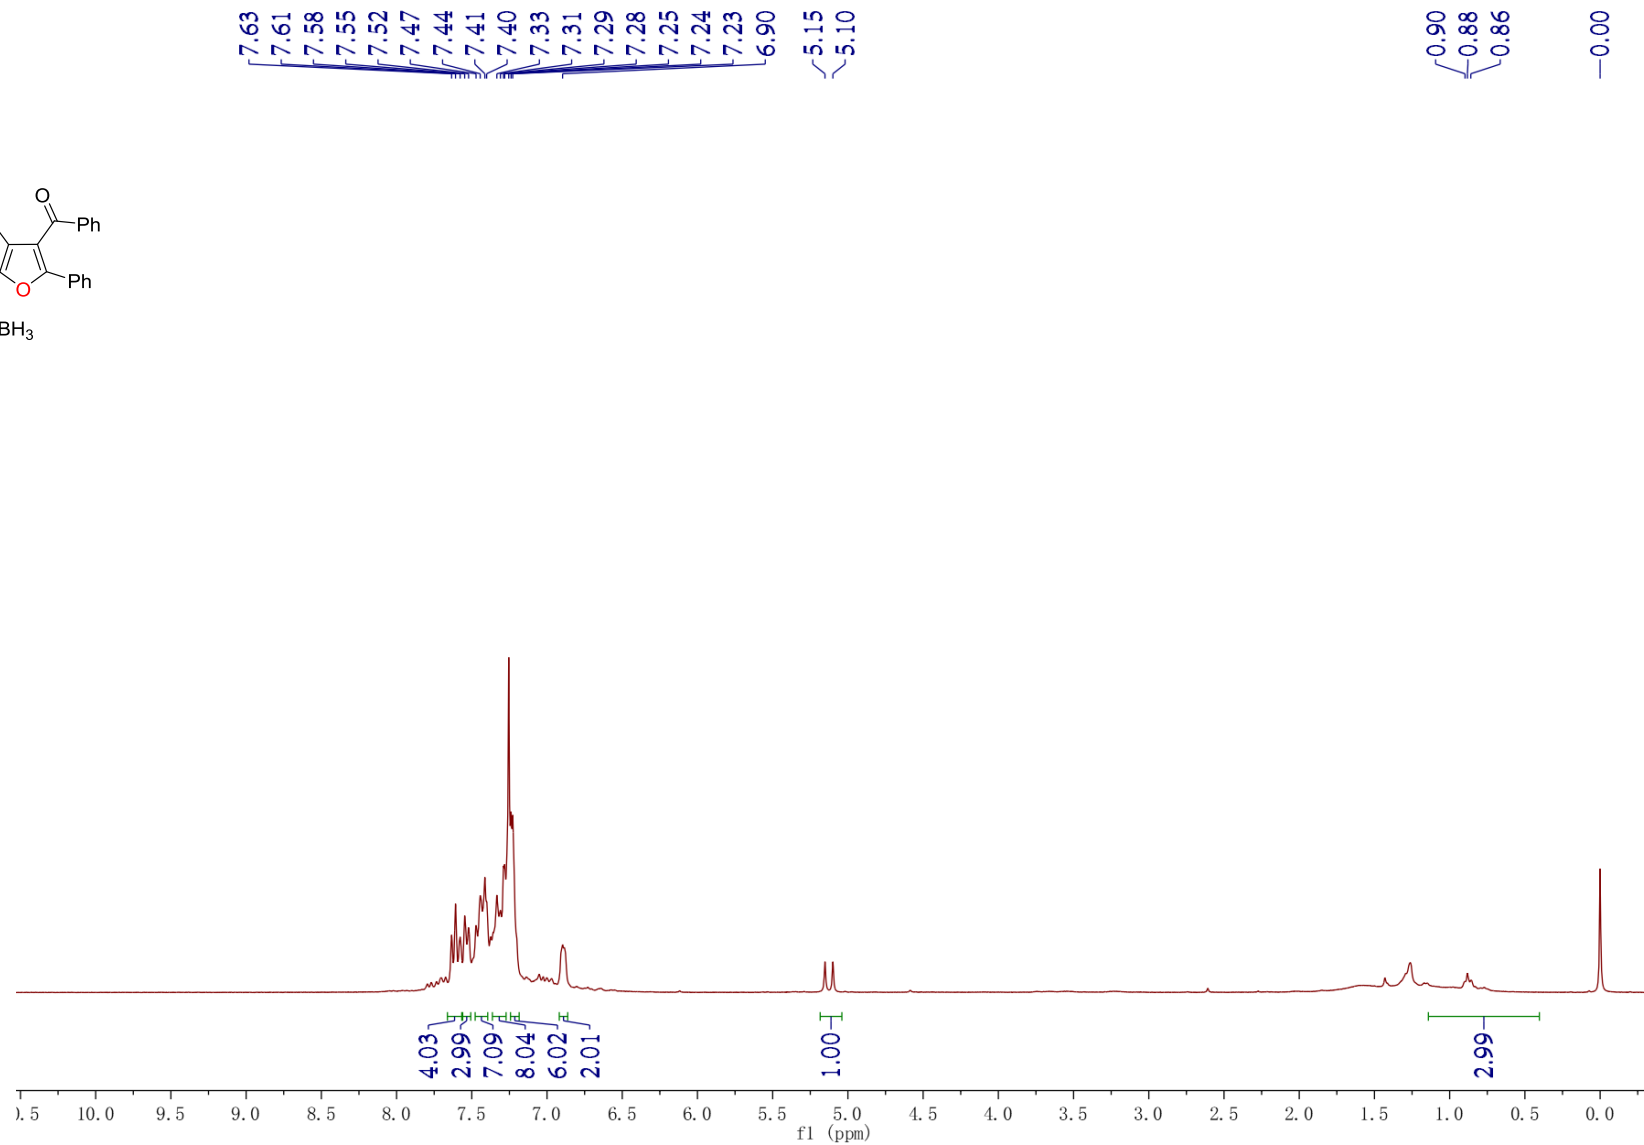

$^1\text{H}$  NMR ( $\text{CDCl}_3$ , 300 MHz) of compound **3a**



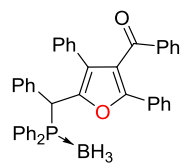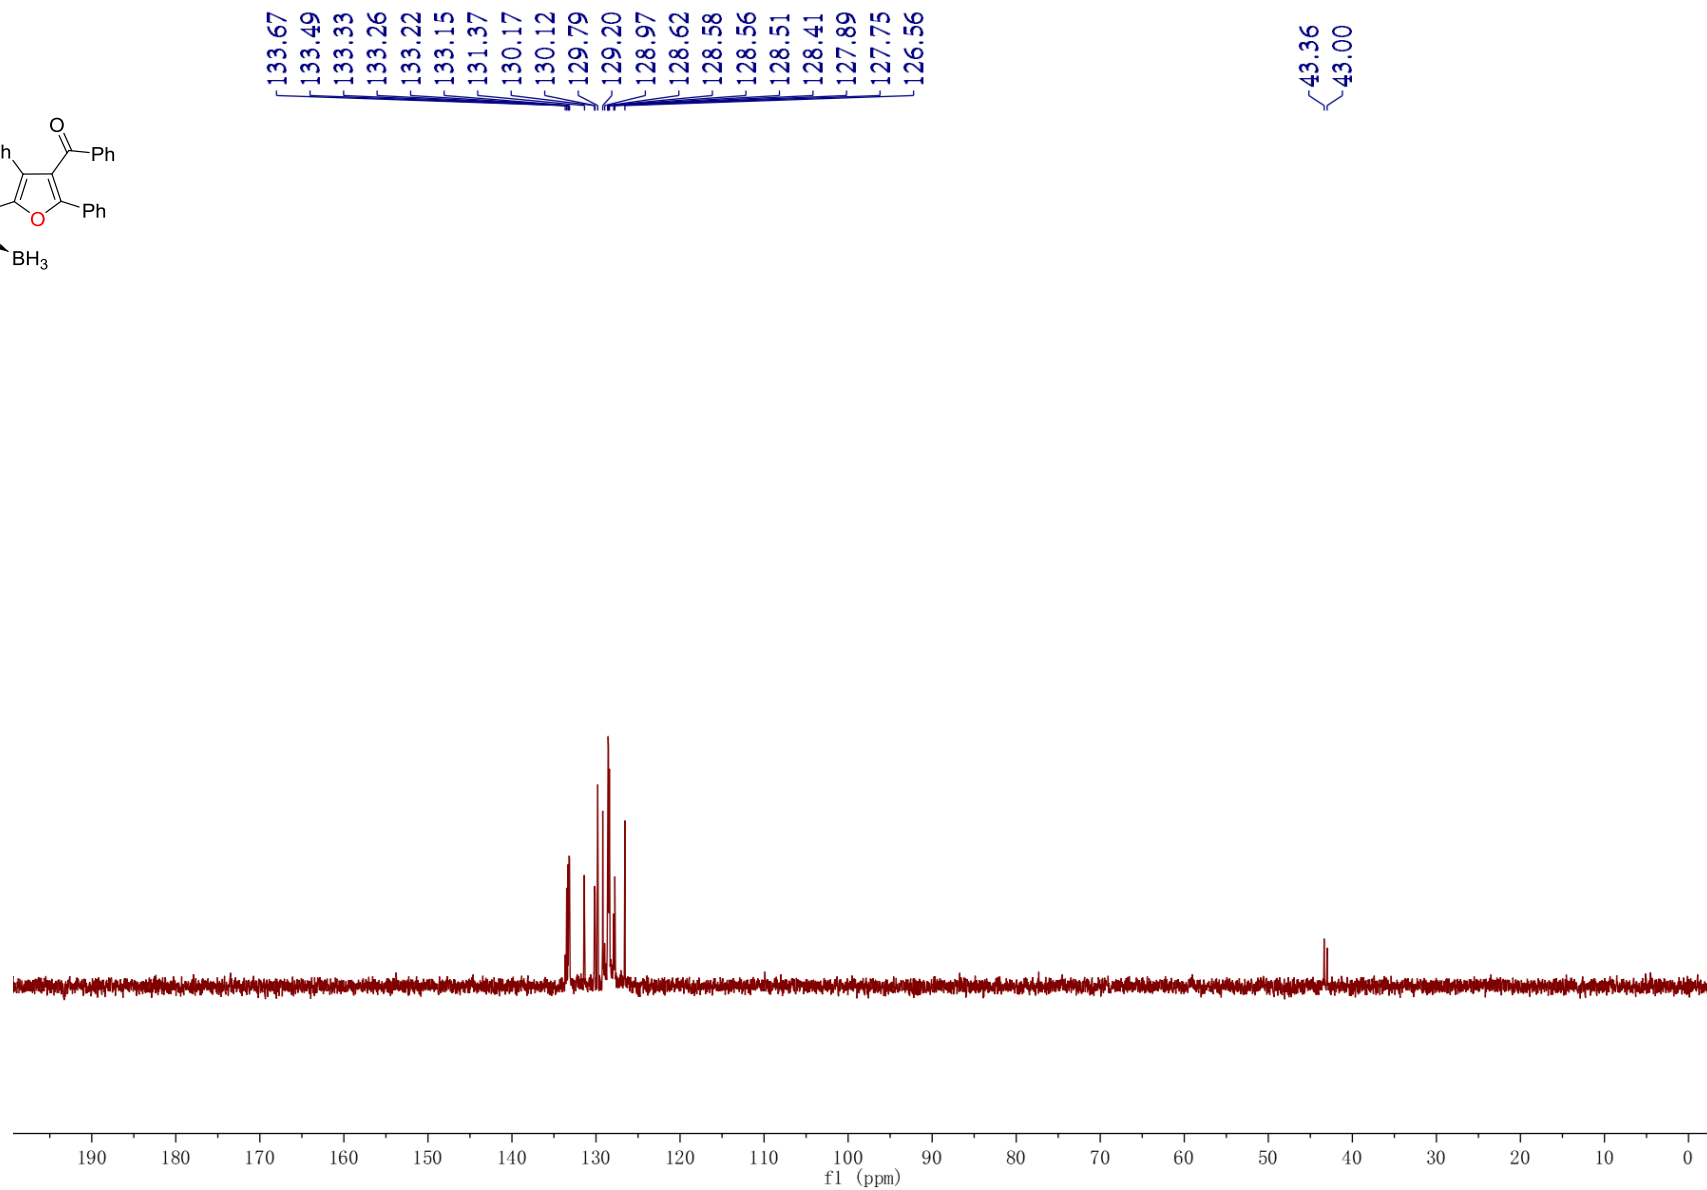

Dept 135 NMR (CDCl<sub>3</sub>, 101 MHz) of Compound 3a

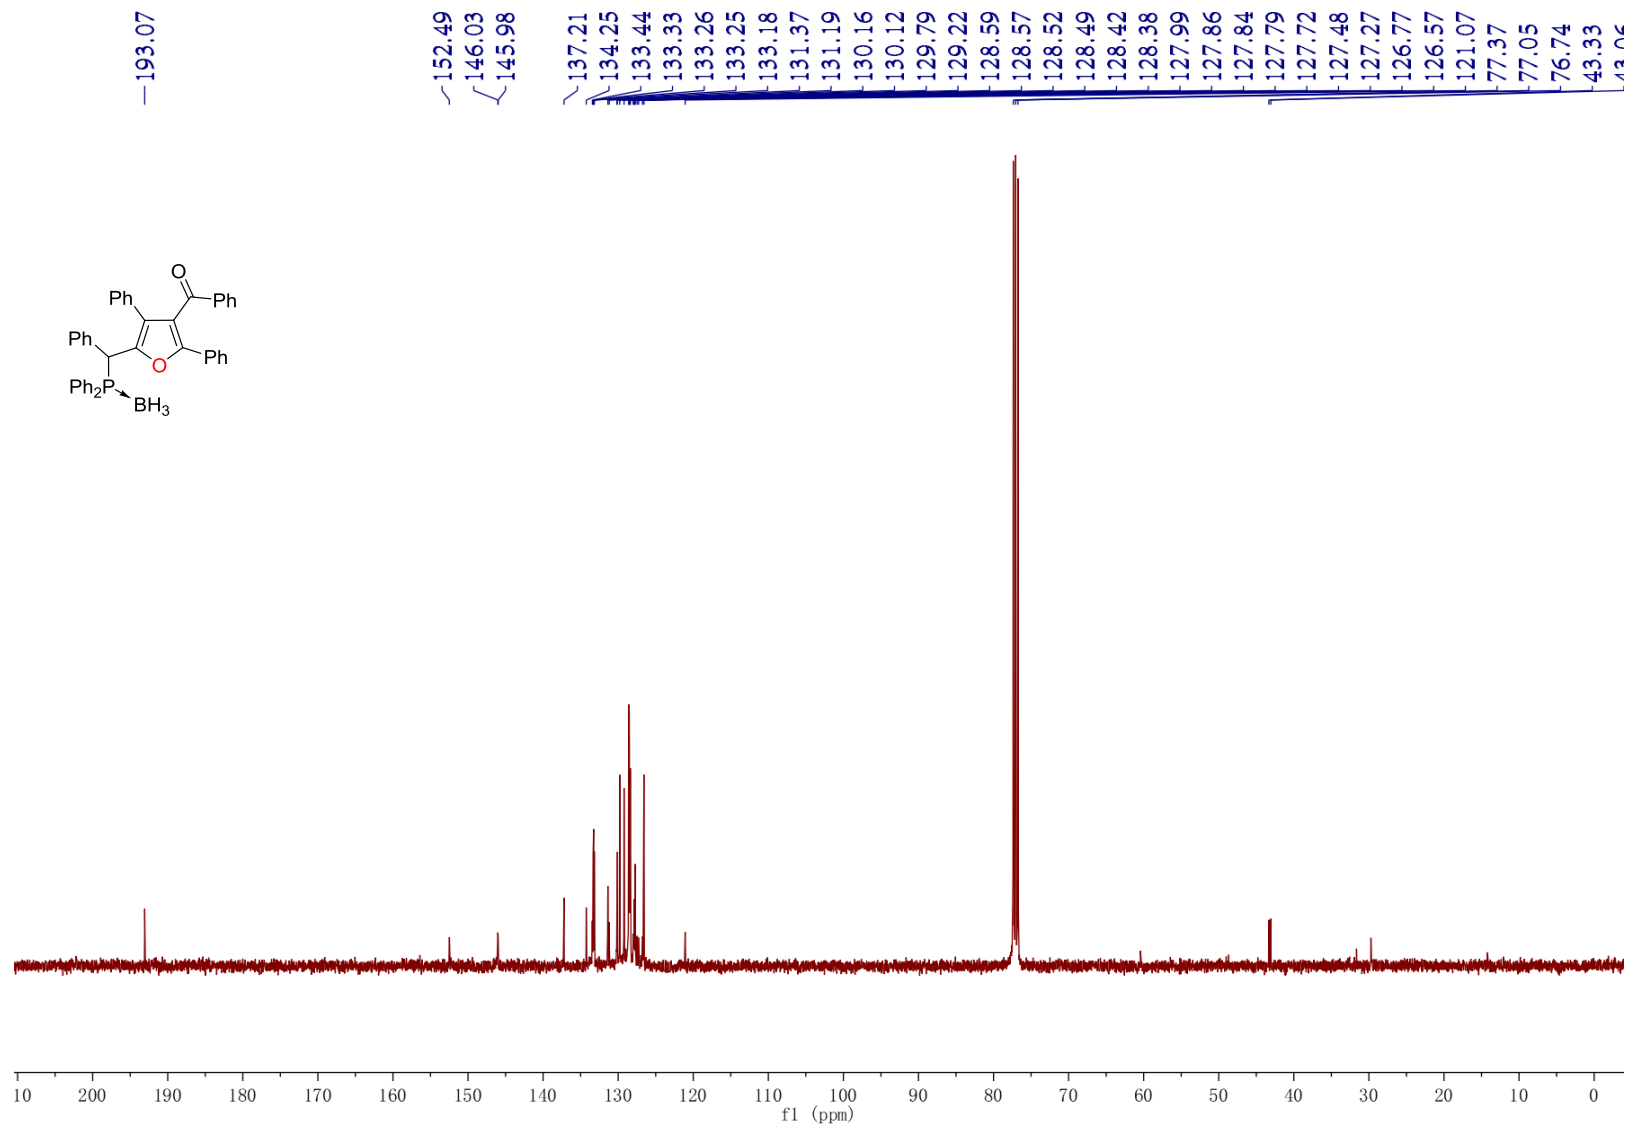

$^{13}\text{C}$   $\{^1\text{H}\}$  NMR ( $\text{CDCl}_3$ , 101 MHz) of compound **3a**

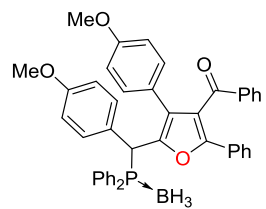

-26.41

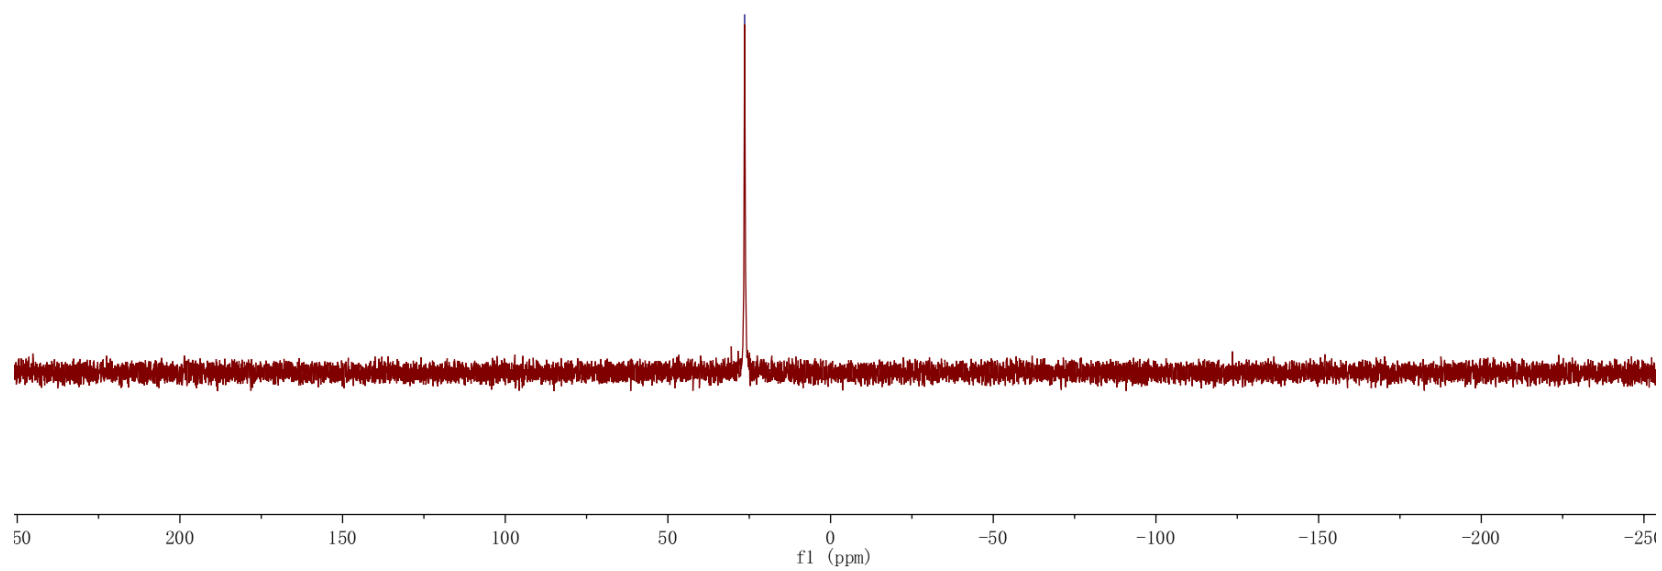

$^{31}\text{P}$   $\{^1\text{H}\}$  NMR ( $\text{CDCl}_3$ , 121 MHz) of compound **3b**

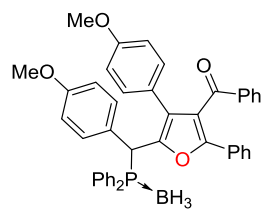

--38.17

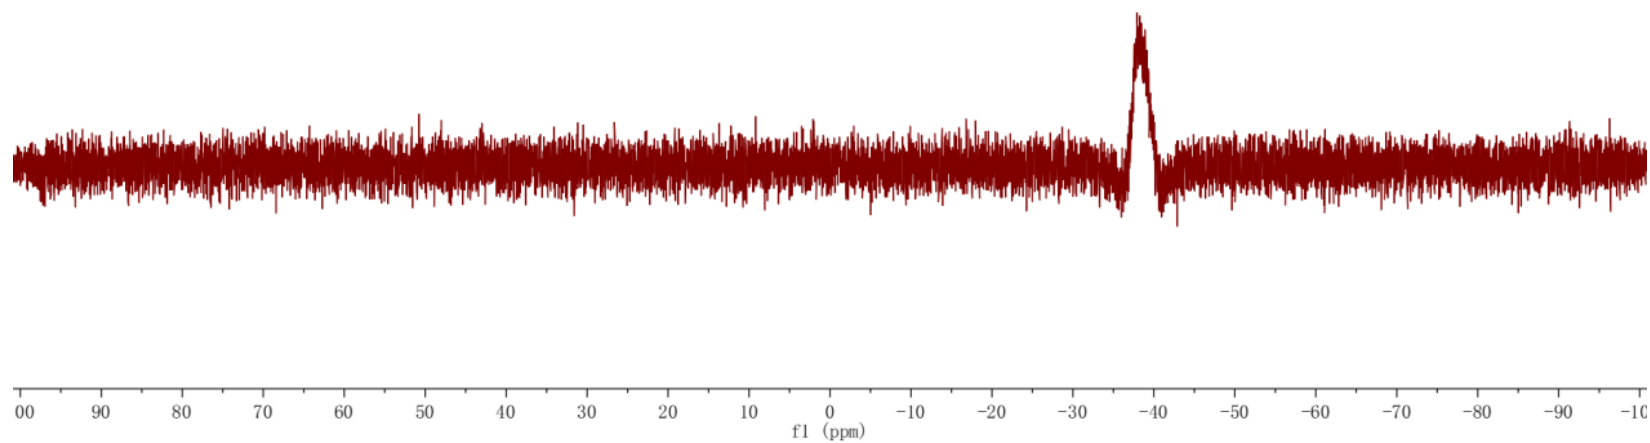

<sup>11</sup>B {<sup>1</sup>H} NMR (CDCl<sub>3</sub>, 128 MHz) of compound **3b**



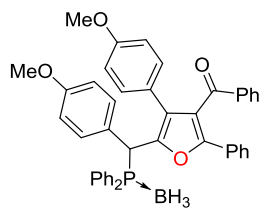

135.23  
 133.55  
 133.36  
 133.29  
 133.24  
 133.17  
 131.34  
 130.41  
 129.82  
 129.54  
 128.58  
 128.45  
 126.46  
 114.51  
 114.10  
 113.86  
 55.24  
 55.21  
 42.55  
 42.19

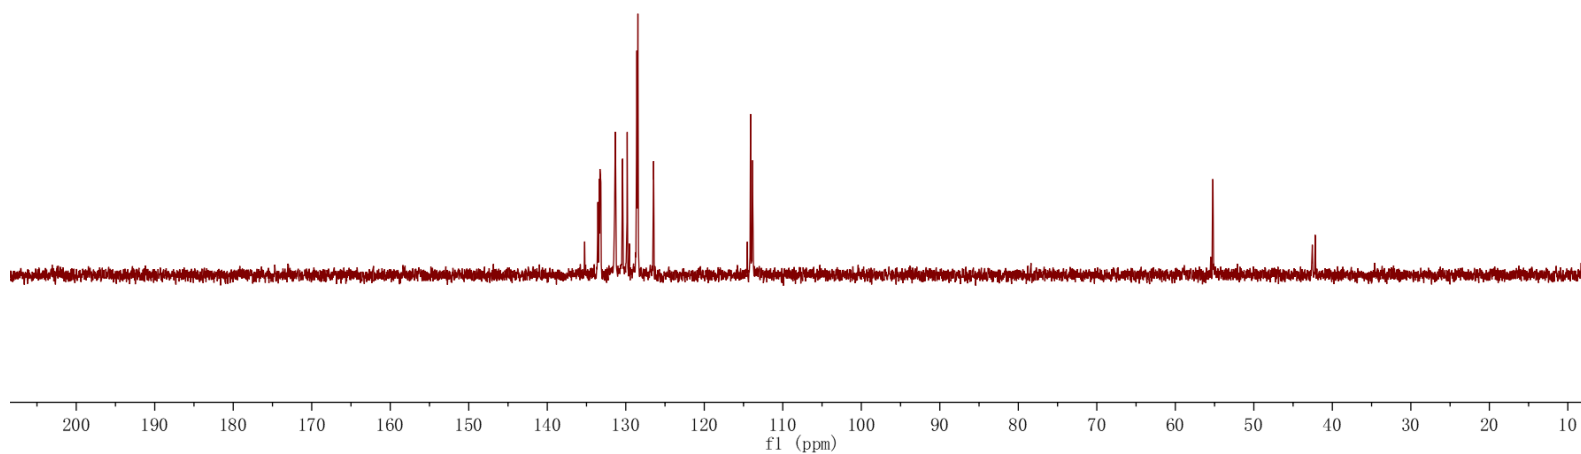

Dept 135 NMR (CDCl<sub>3</sub>, 75 MHz) of Compound **3b**







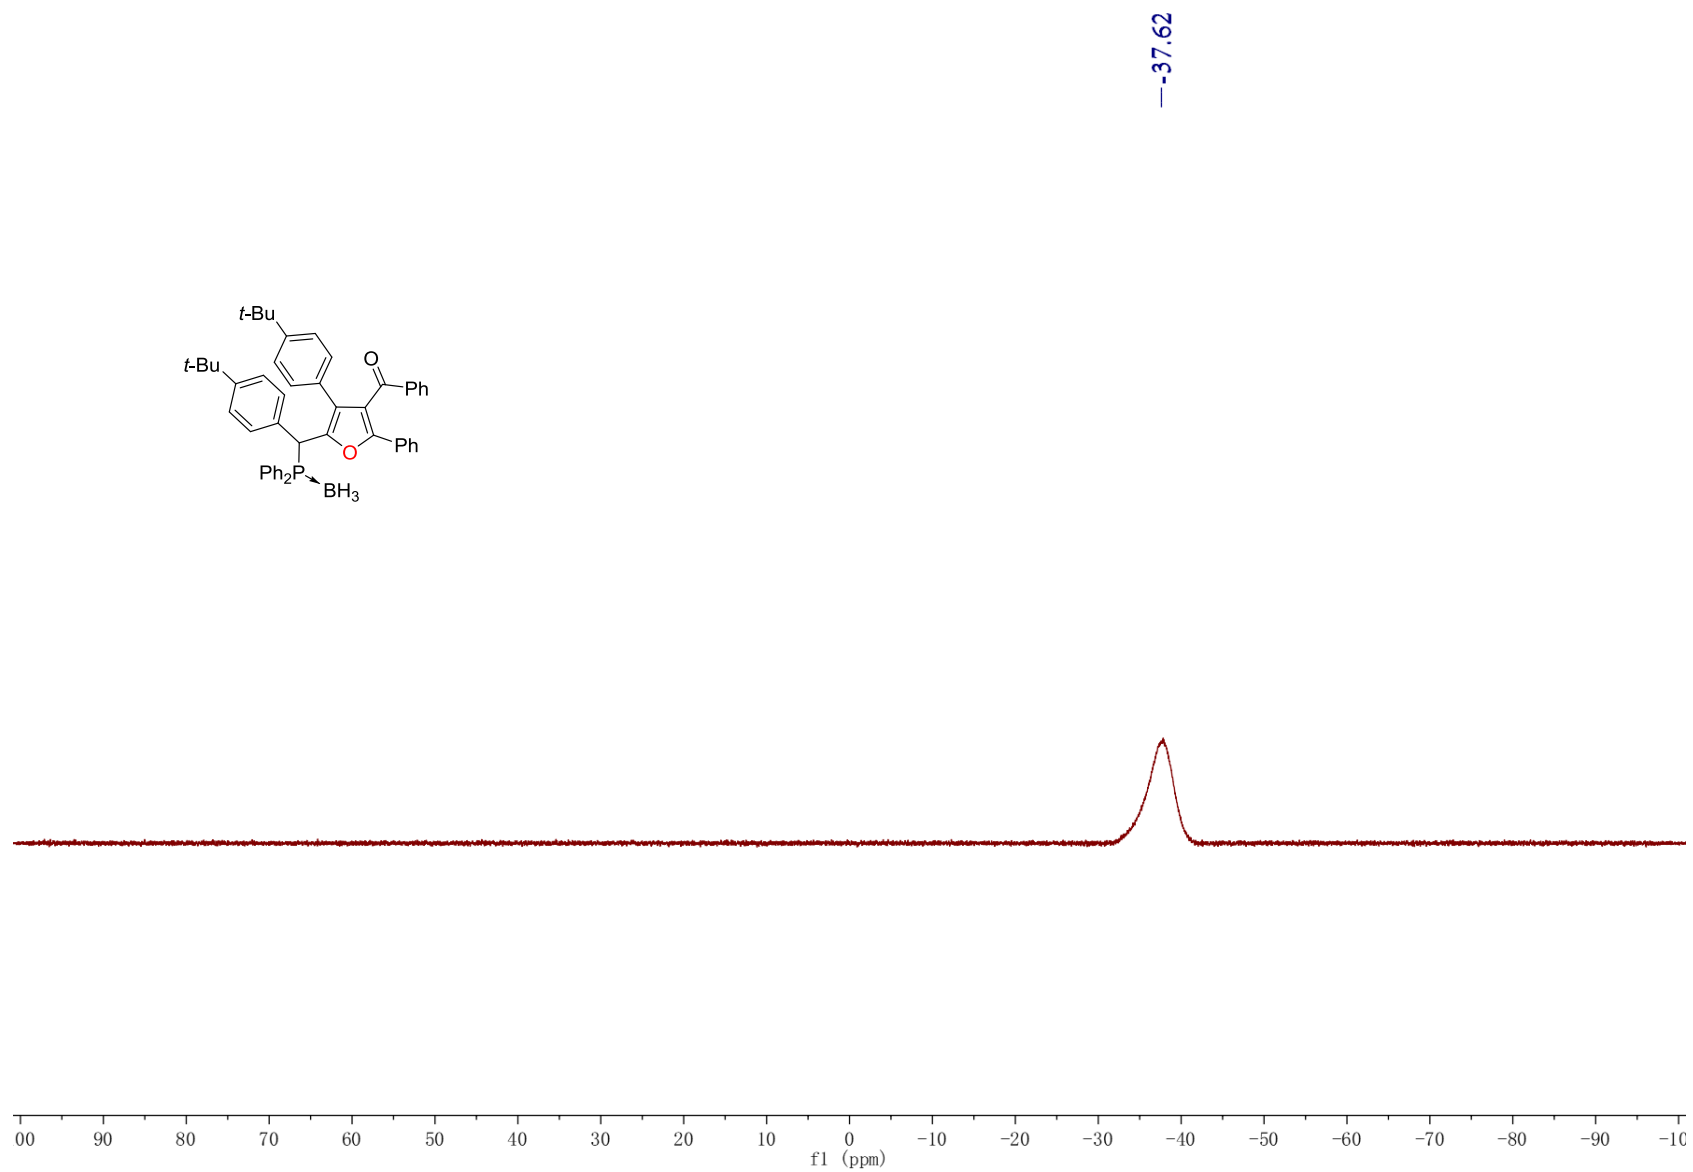

$^{11}\text{B}$   $\{^1\text{H}\}$  NMR ( $\text{CDCl}_3$ , 128 MHz) of compound **3c**

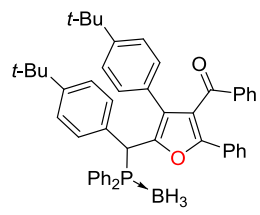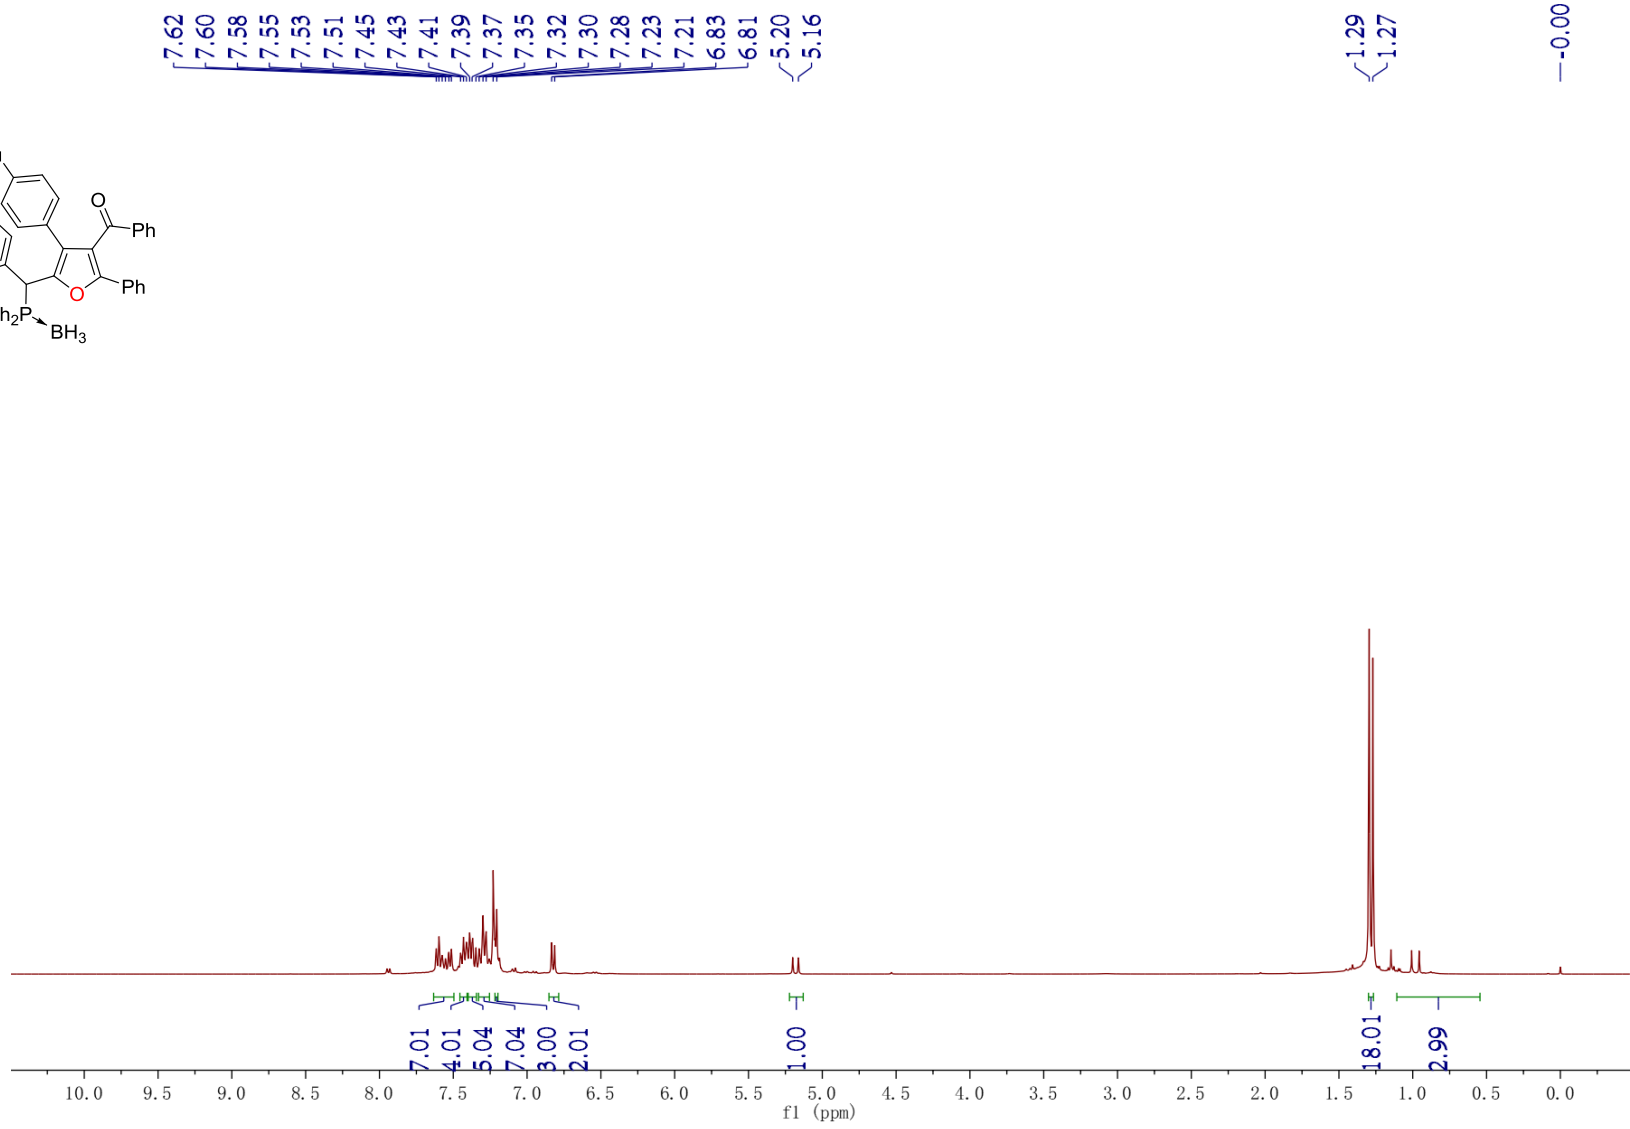

<sup>1</sup>H NMR (CDCl<sub>3</sub>, 400 MHz) of compound **3c**



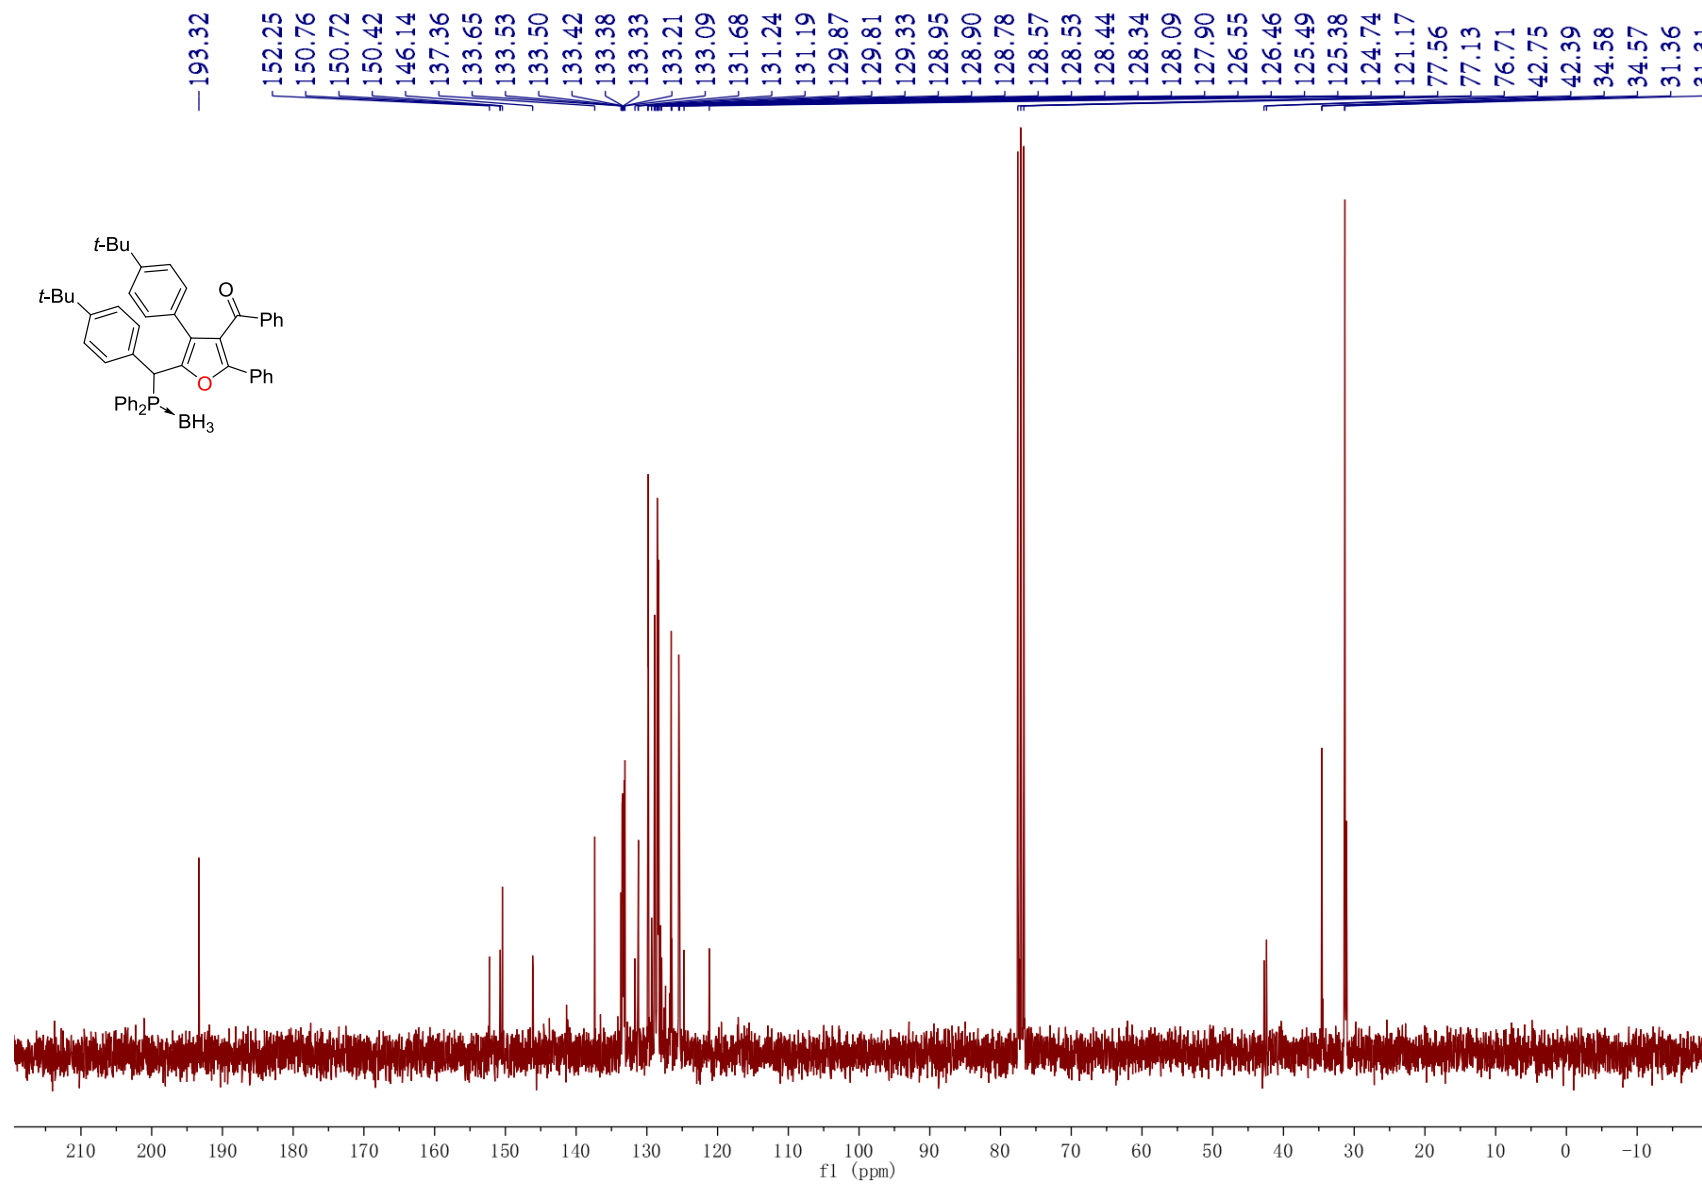

<sup>13</sup>C {<sup>1</sup>H} NMR (CDCl<sub>3</sub>, 101 MHz) of compound 3c



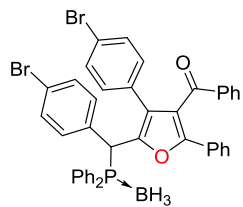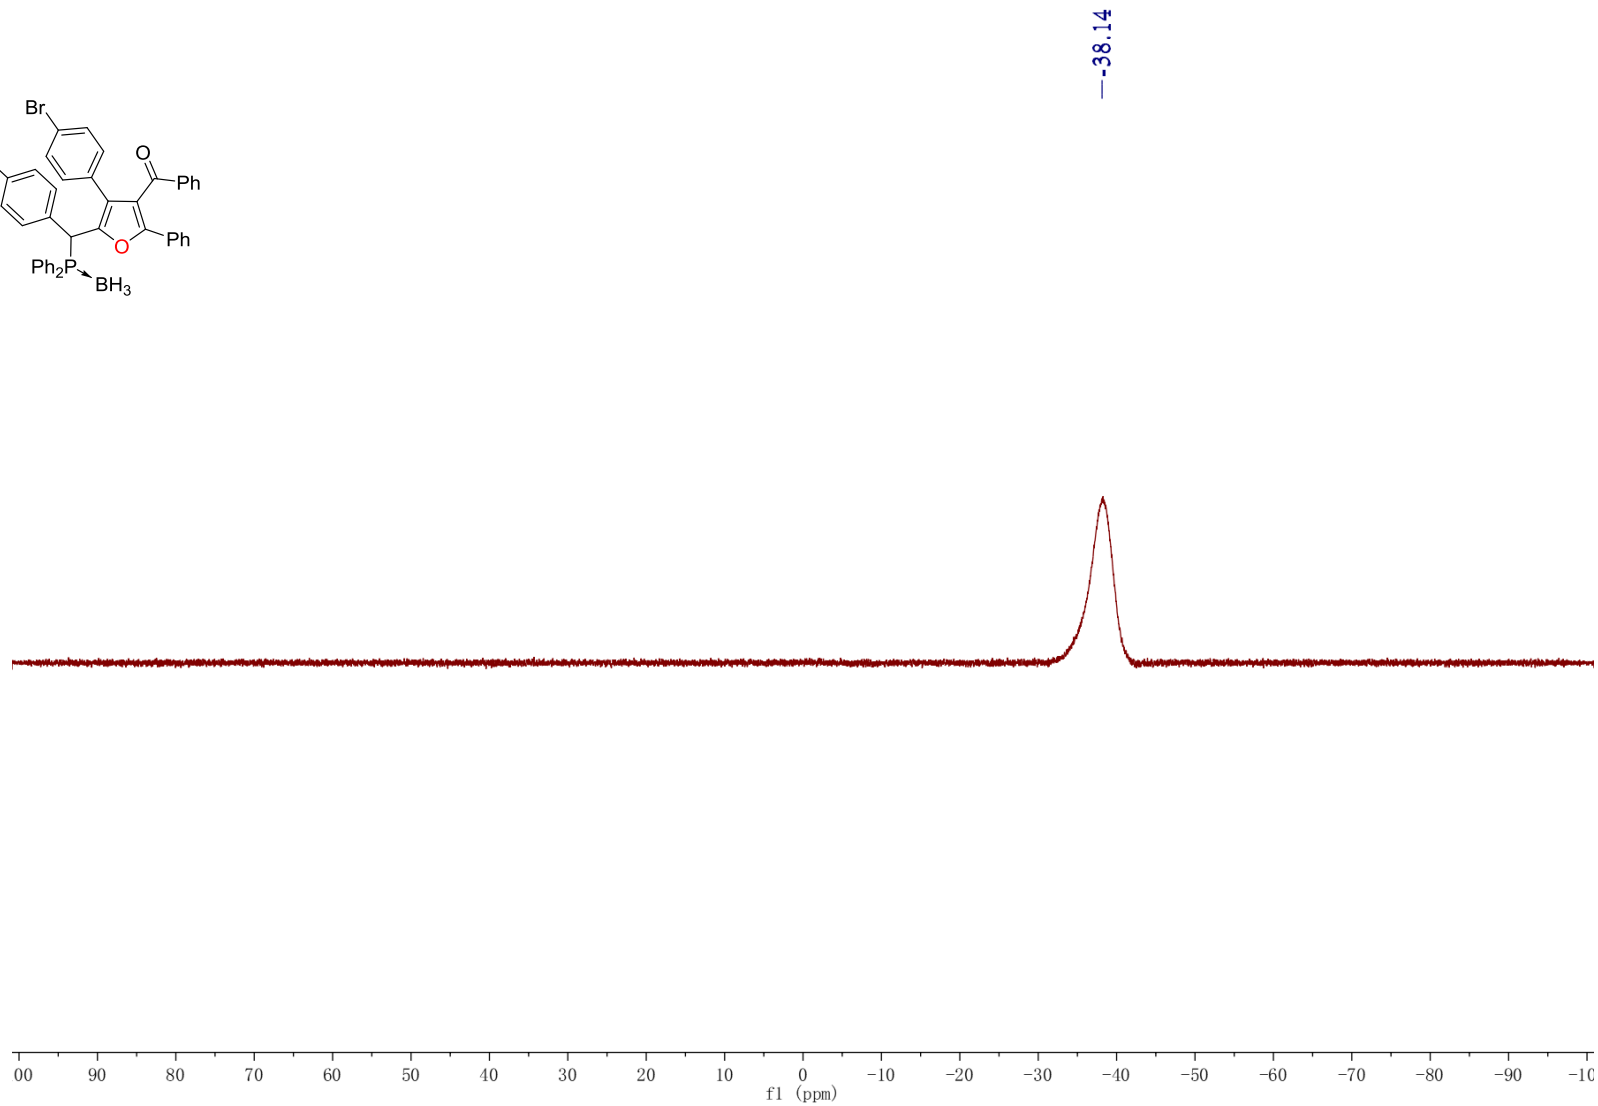

$^{11}\text{B}$  { $^1\text{H}$ } NMR ( $\text{CDCl}_3$ , 128 MHz) of compound **3d**

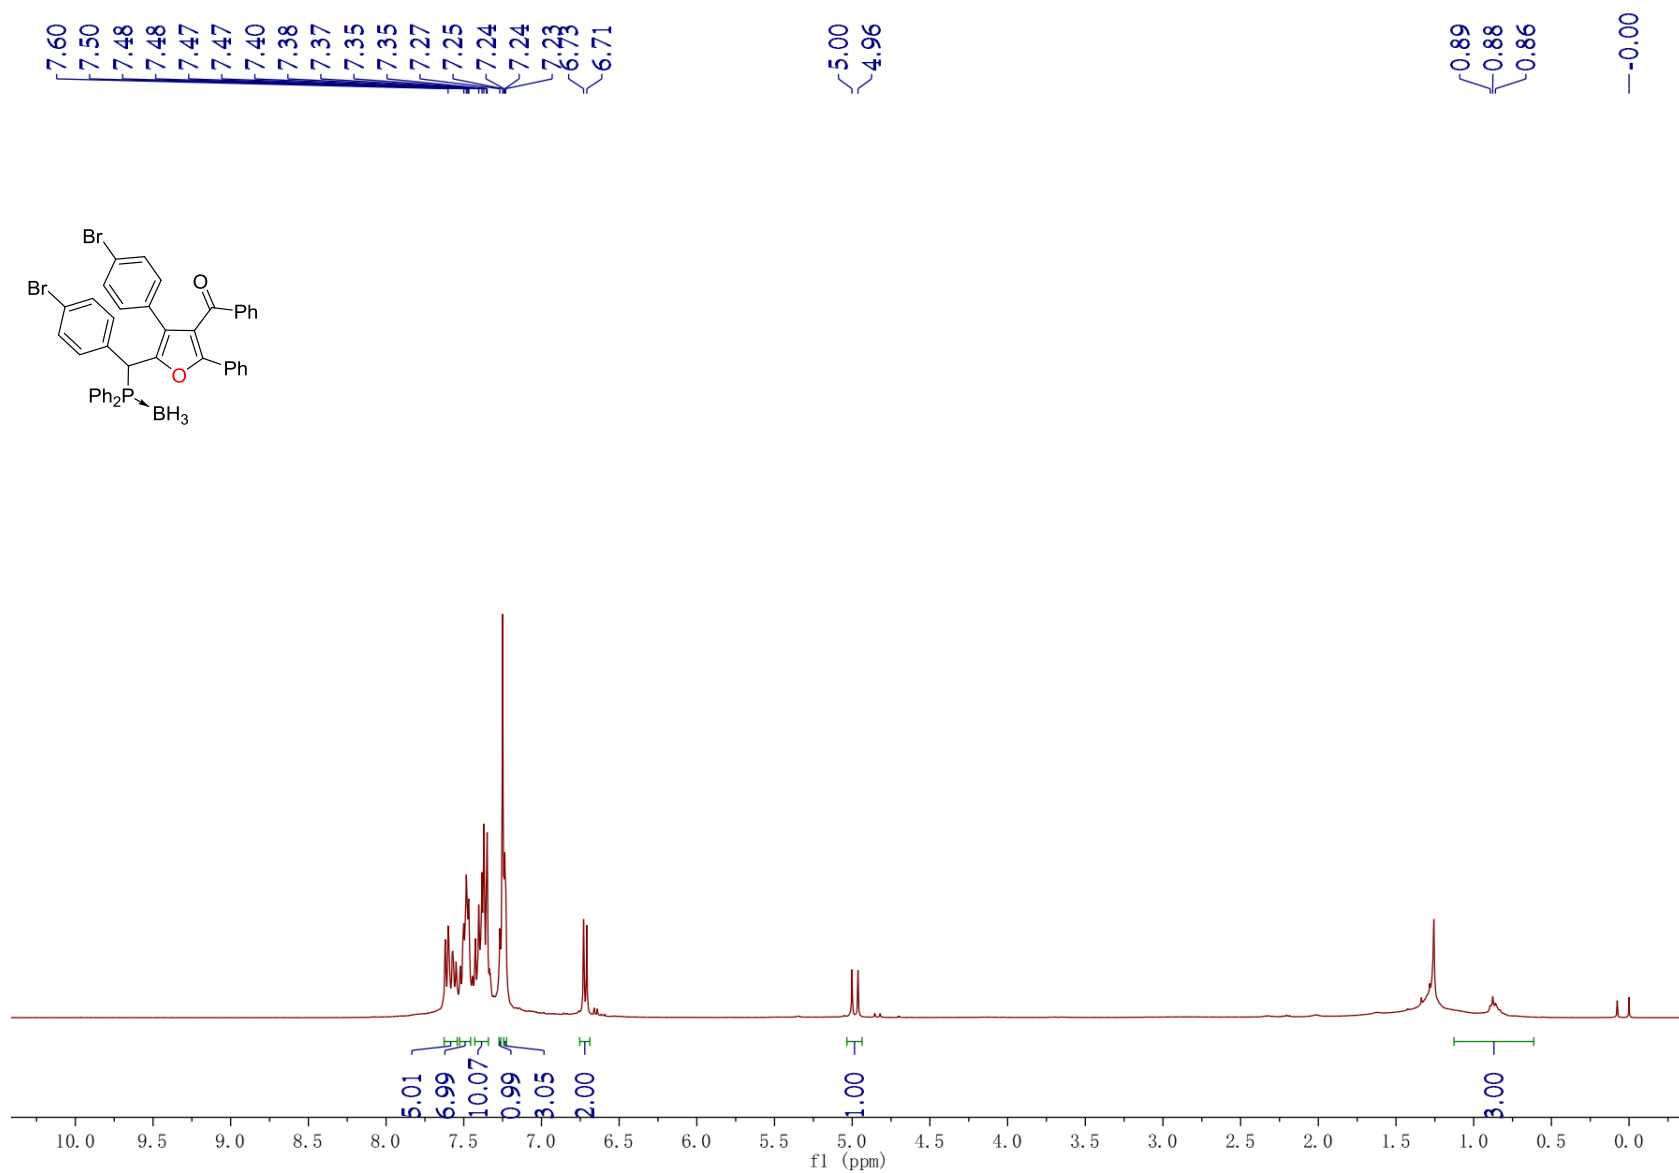

$^1\text{H}$  NMR (CDCl<sub>3</sub>, 400 MHz) of compound **3d**





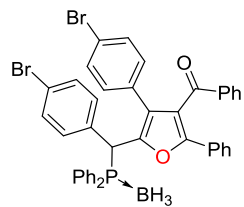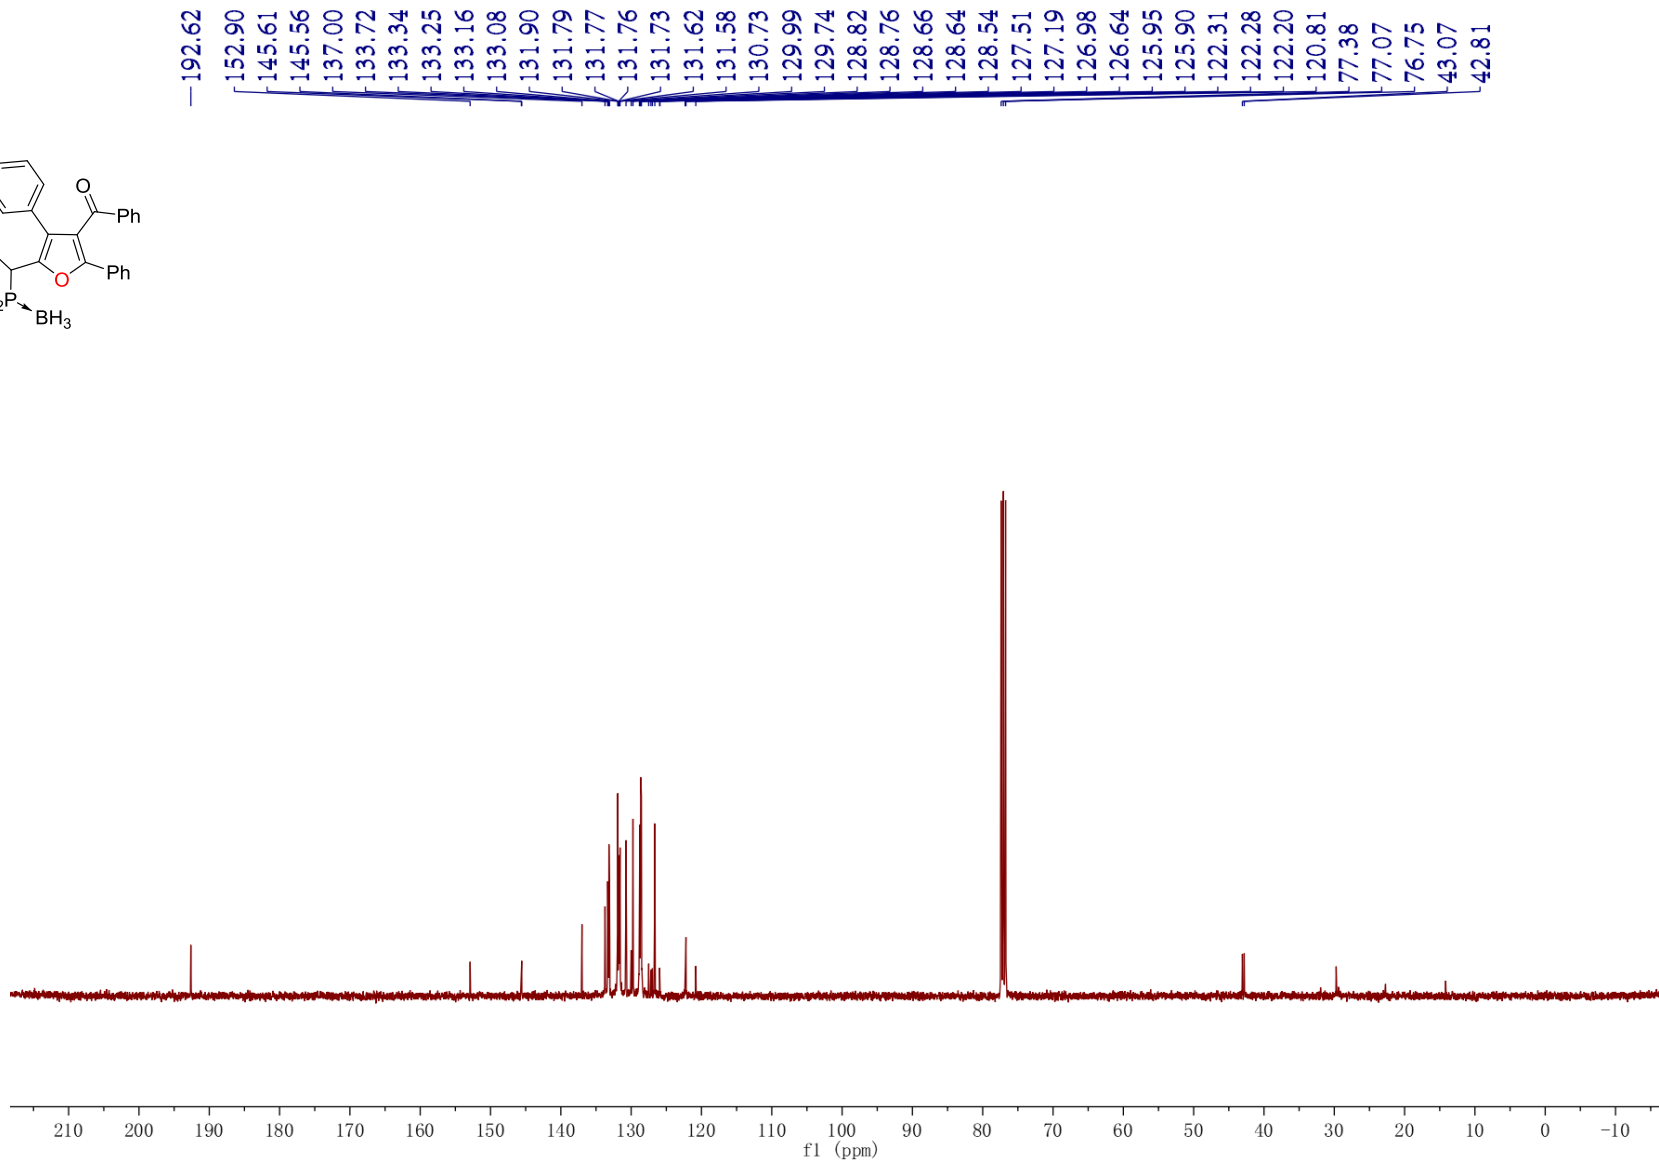

<sup>13</sup>C {<sup>1</sup>H} NMR (CDCl<sub>3</sub>, 101 MHz) of compound 3d

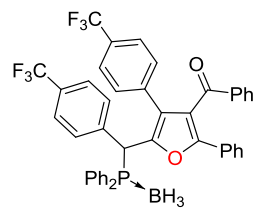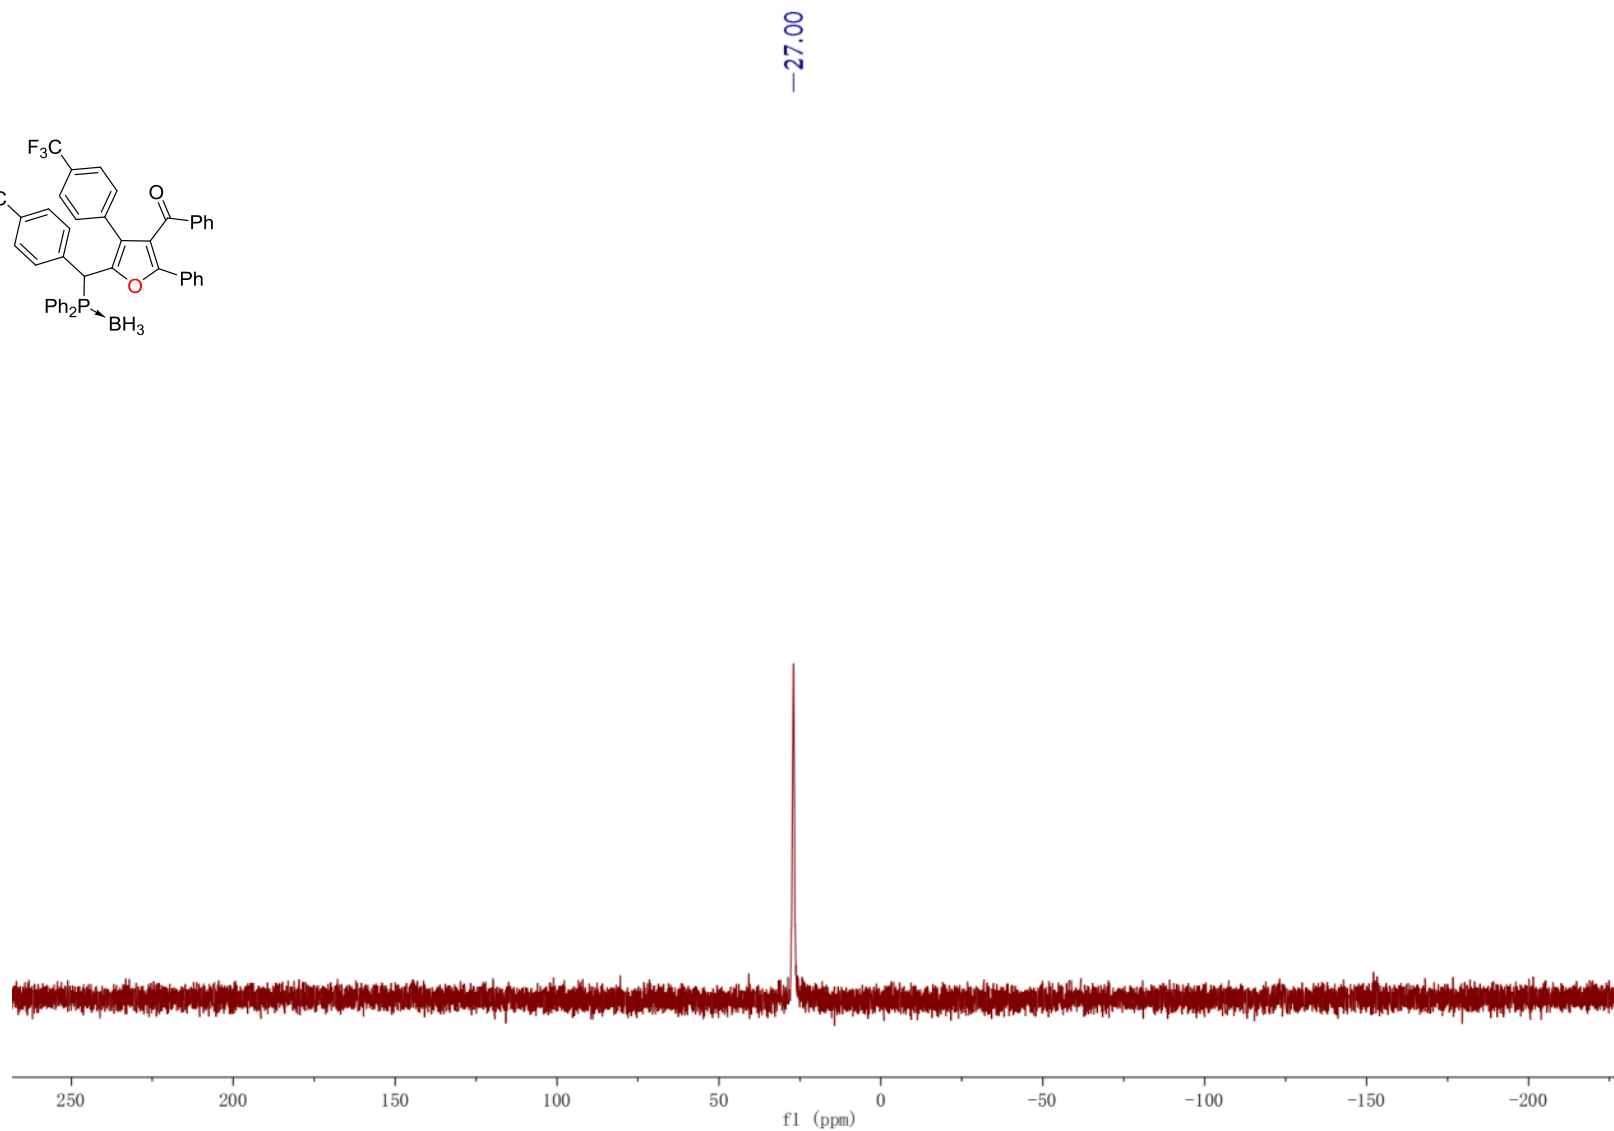

<sup>31</sup>P {<sup>1</sup>H} NMR (CDCl<sub>3</sub>, 121 MHz) of compound 3e

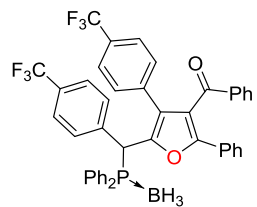

--38.82

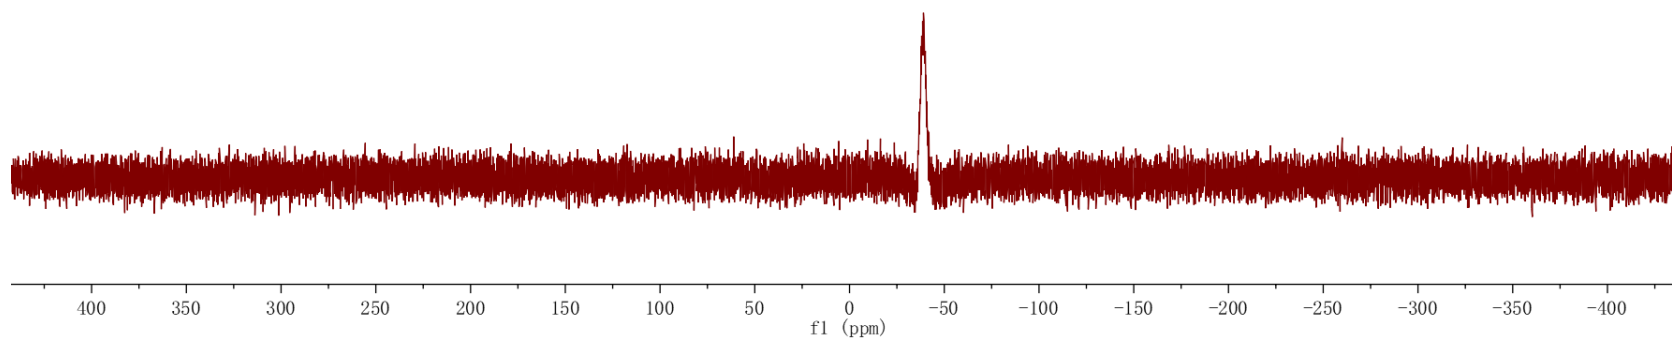

$^{11}\text{B}$   $\{^1\text{H}\}$  NMR ( $\text{CDCl}_3$ , 128 MHz) of compound **3e**

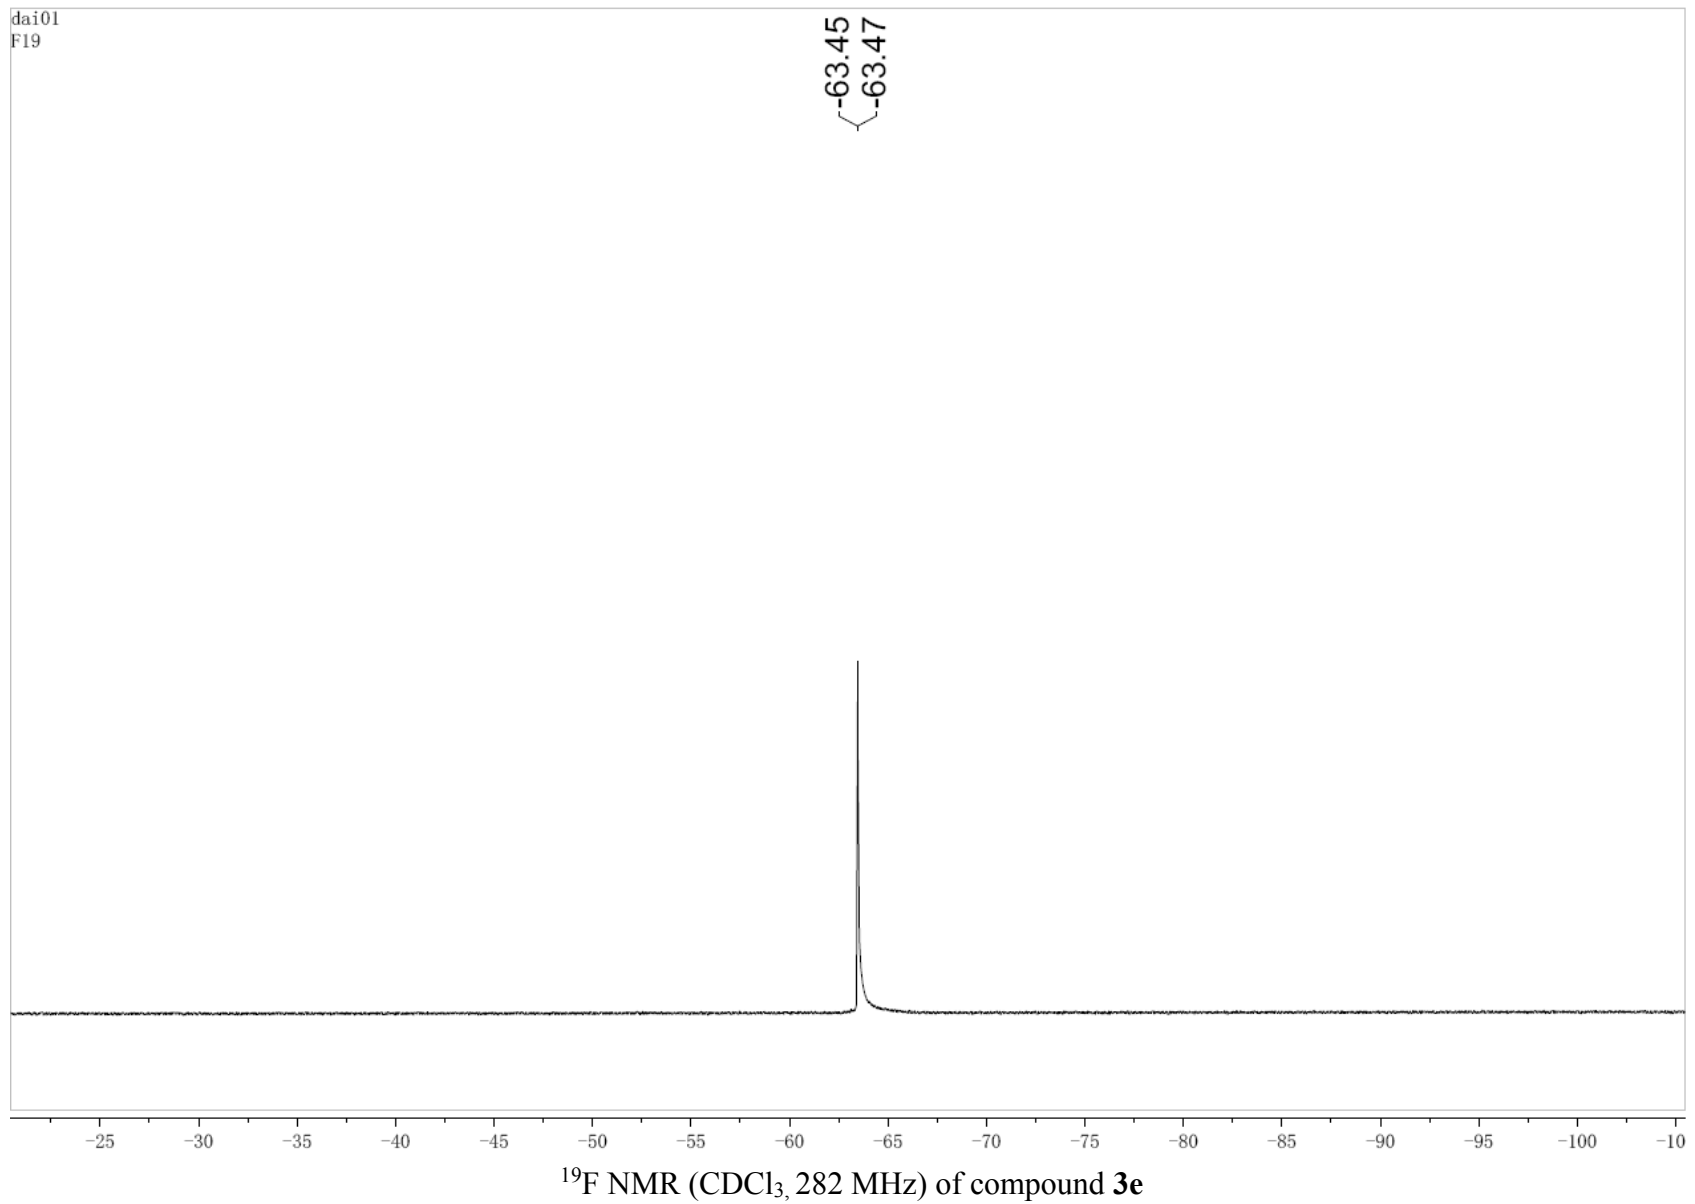

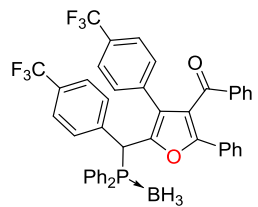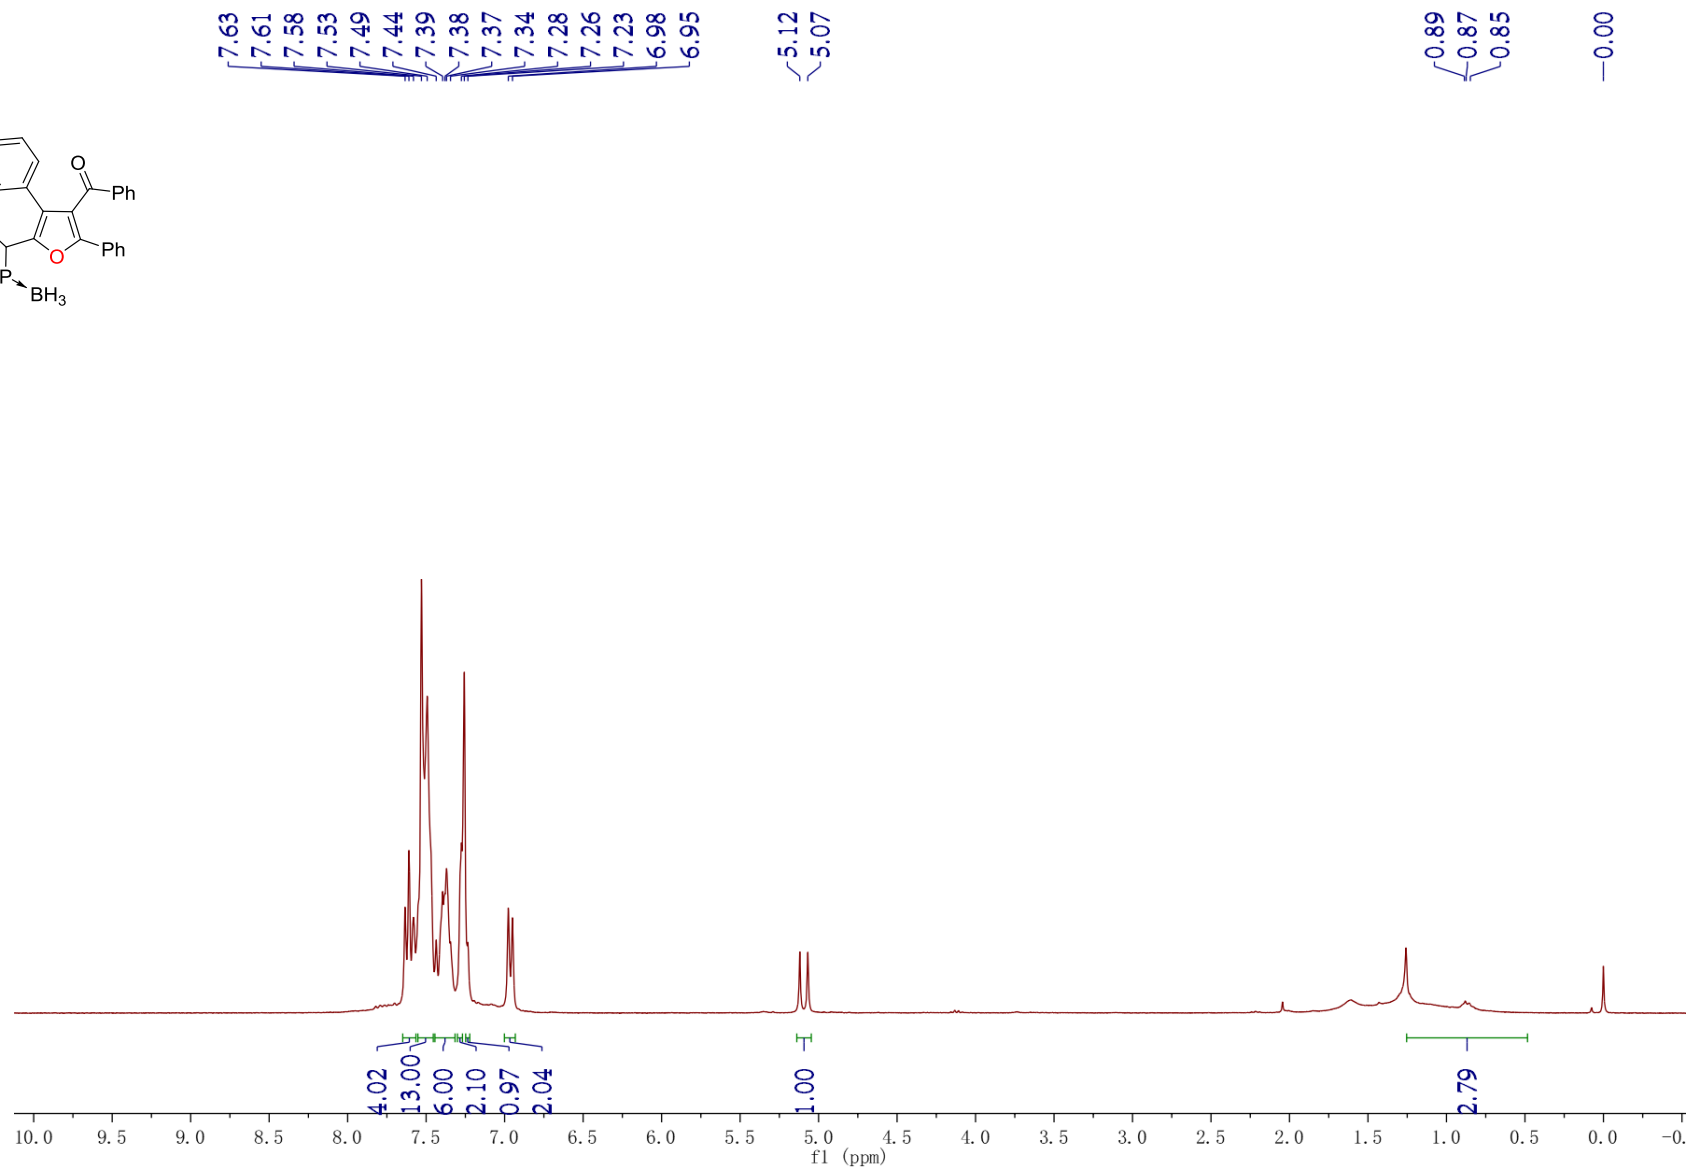

$^1\text{H}$  NMR ( $\text{CDCl}_3$ , 300 MHz) of compound **3e**

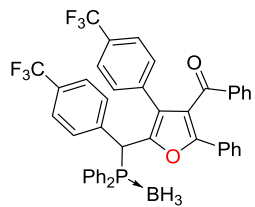

133.79  
133.29  
133.17  
133.13  
133.01  
131.94  
131.90  
131.75  
131.72  
130.32  
130.26  
129.70  
129.42  
129.01  
128.84  
128.71  
128.66  
128.56  
126.76  
125.69  
125.64  
125.54  
125.50

43.54  
43.19

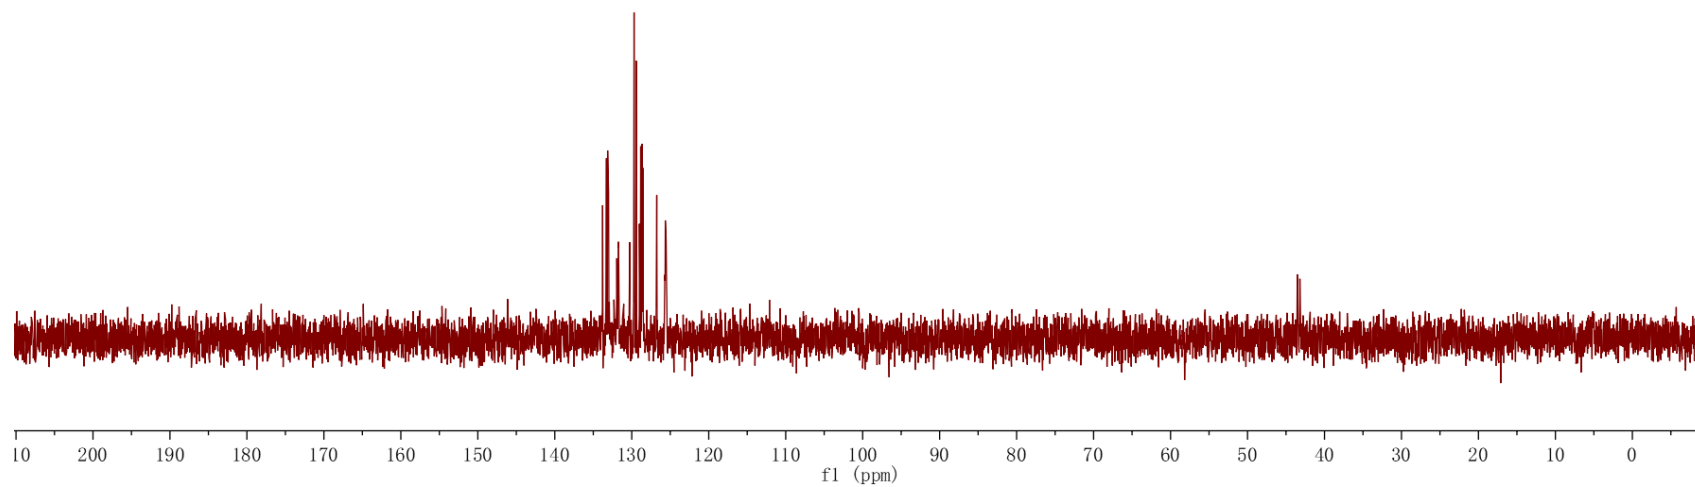

Dept 135 NMR (CDCl<sub>3</sub>, 101 MHz) of Compound **3e**

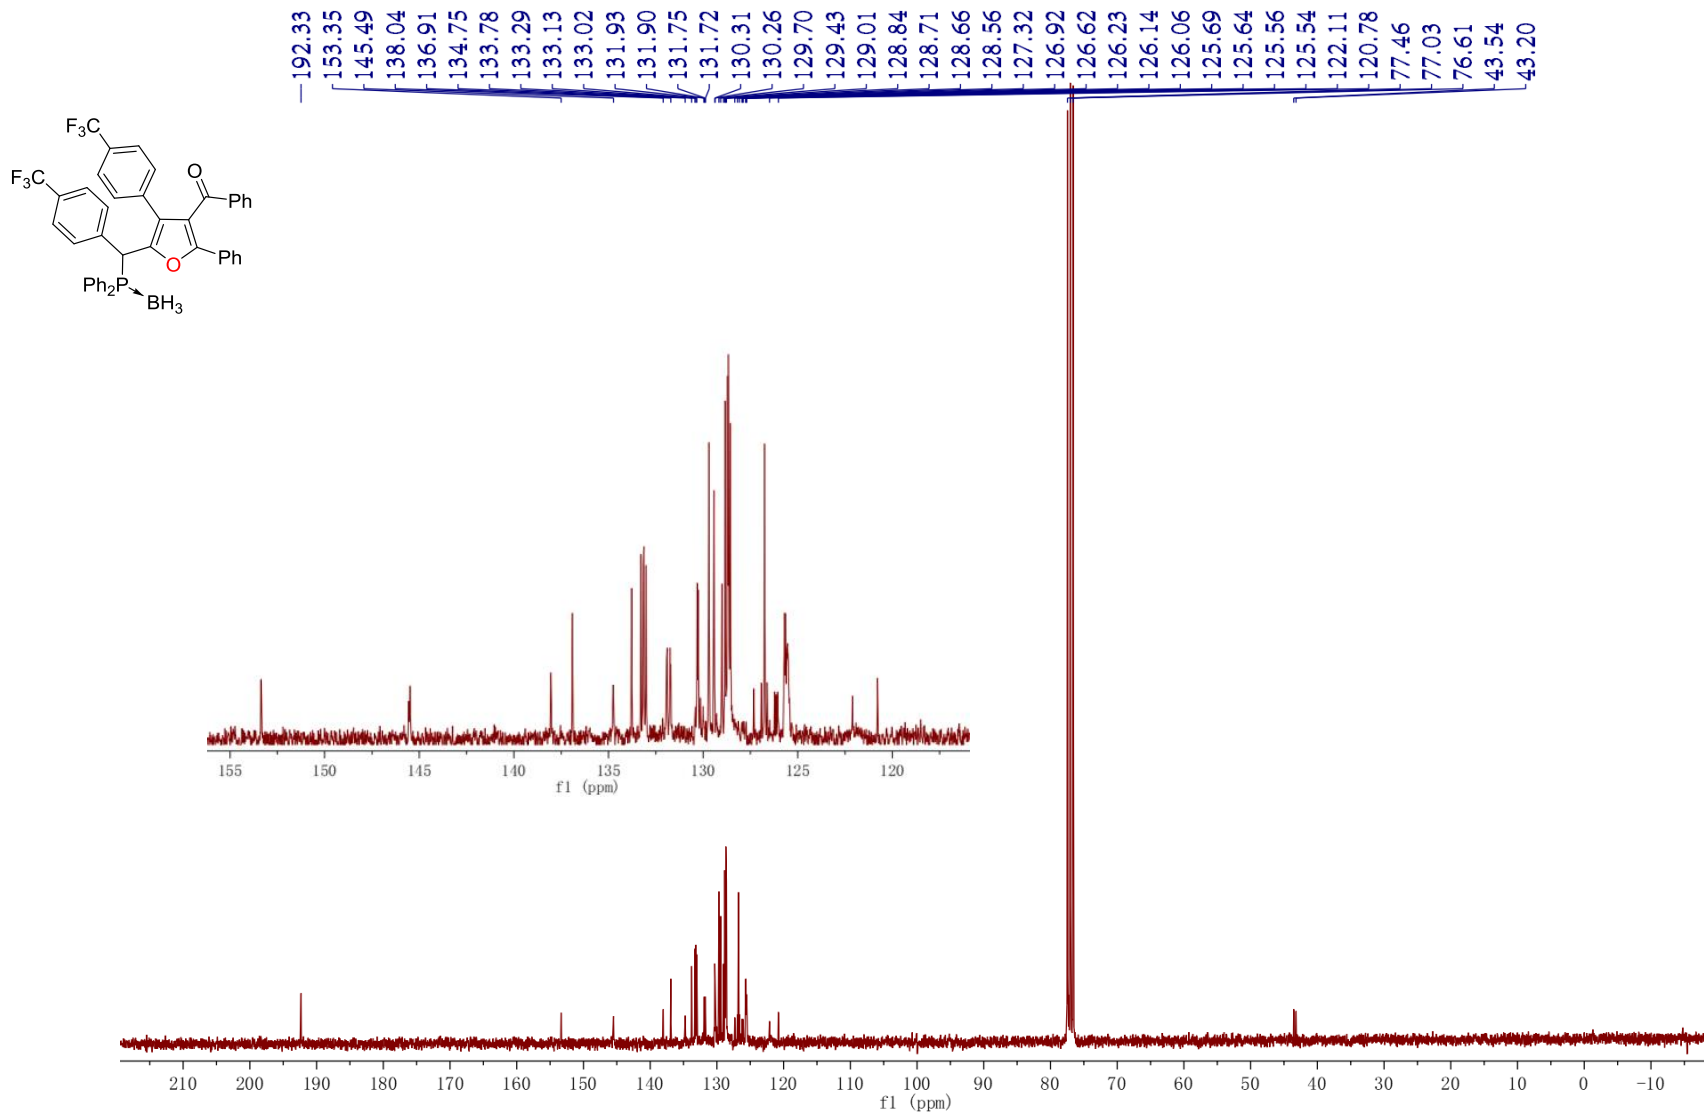

<sup>13</sup>C {<sup>1</sup>H} NMR (CDCl<sub>3</sub>, 75 MHz) of compound 3e

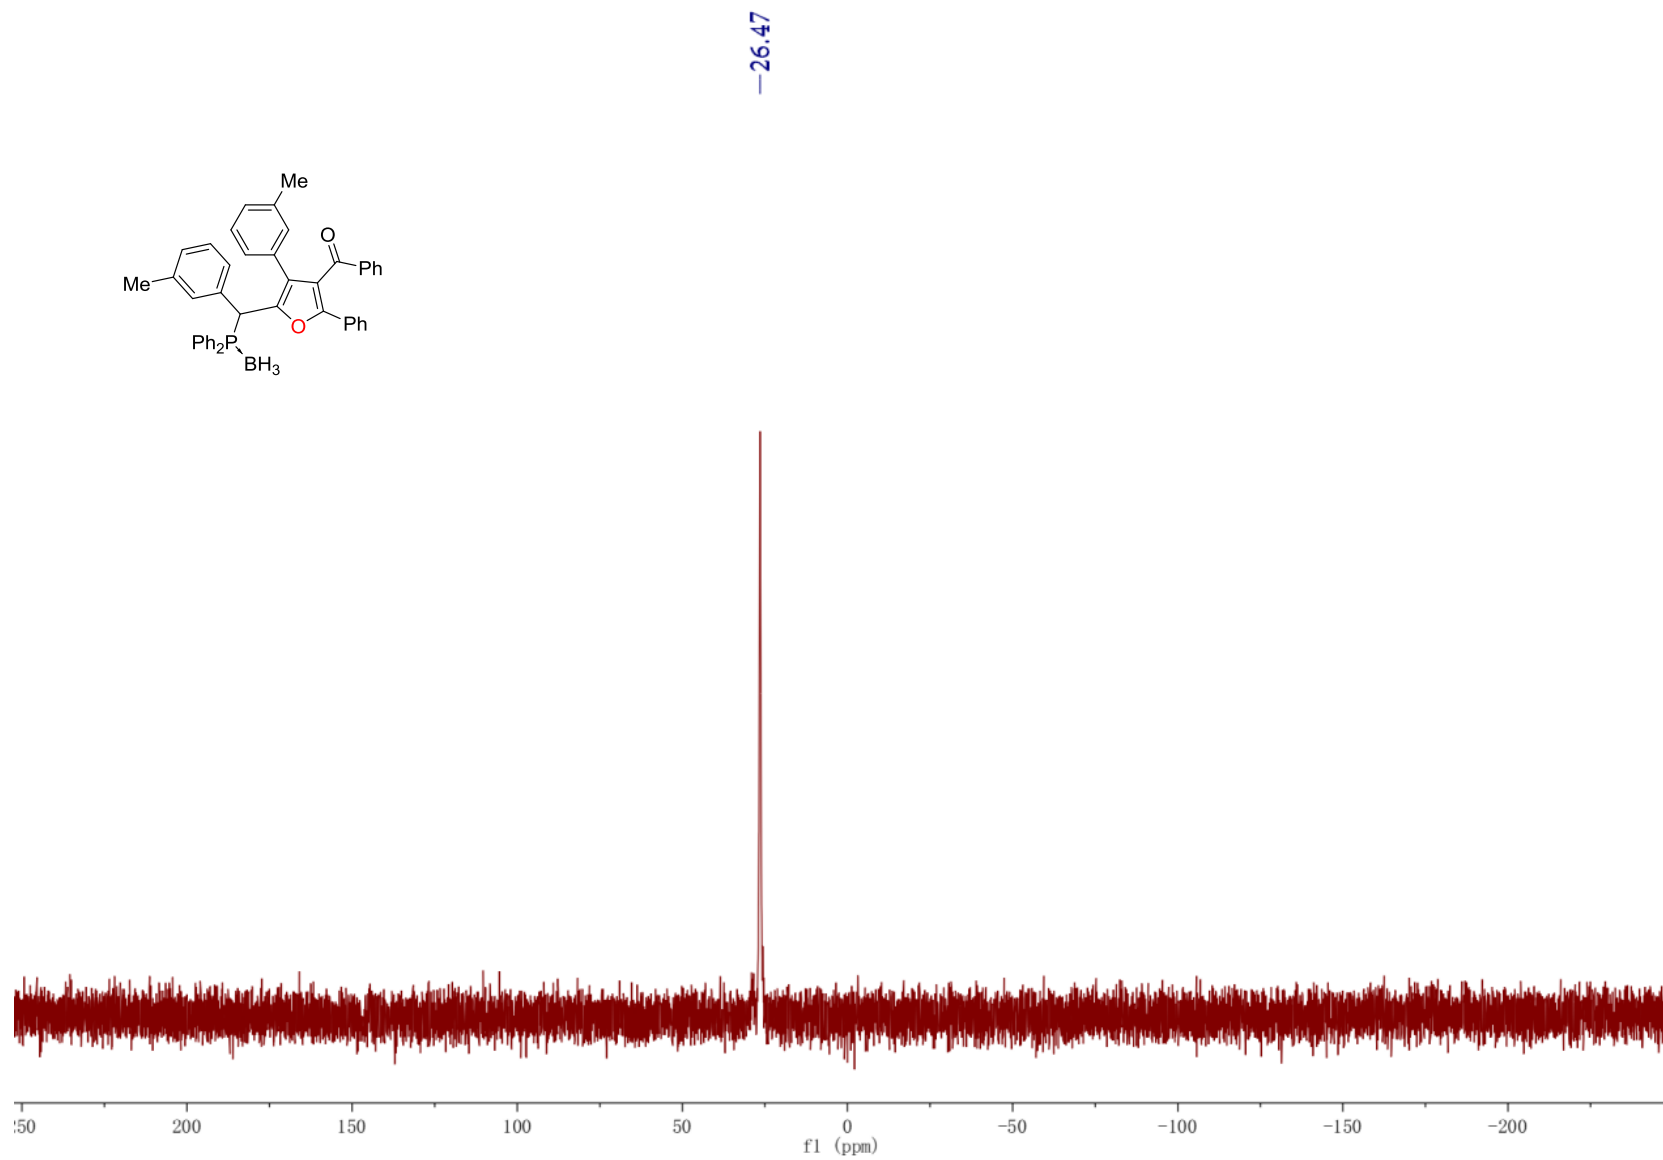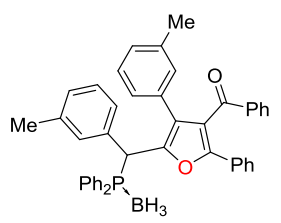

$^{31}\text{P}$  { $^1\text{H}$ } NMR ( $\text{CDCl}_3$ , 121 MHz) of compound **3f**



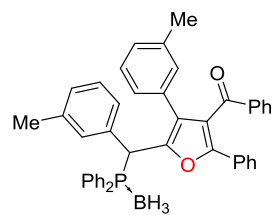

—-39.27

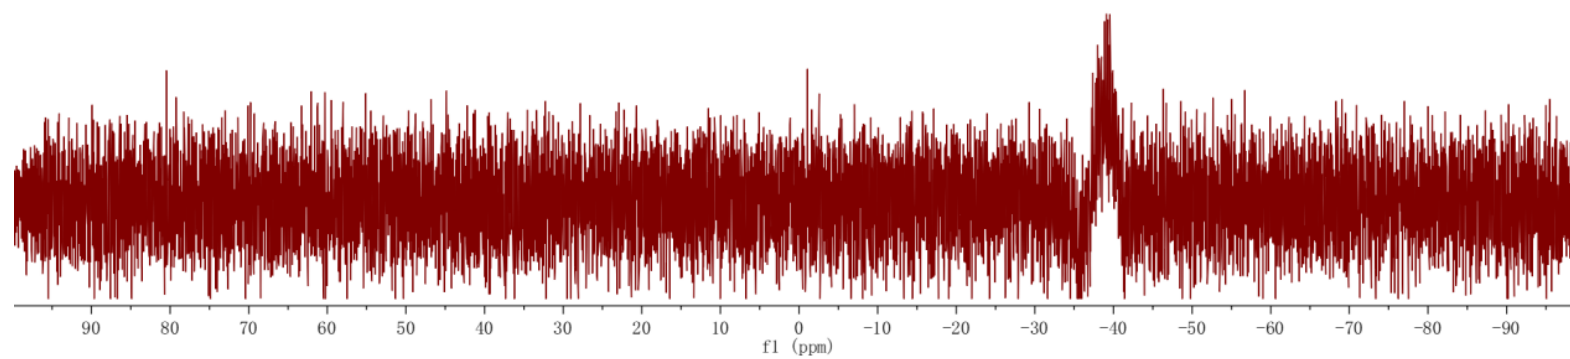

$^{11}\text{B}$   $\{^1\text{H}\}$  NMR ( $\text{CDCl}_3$ , 128 MHz) of compound **3f**

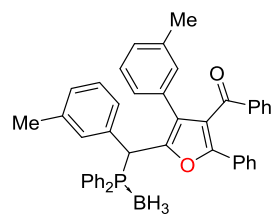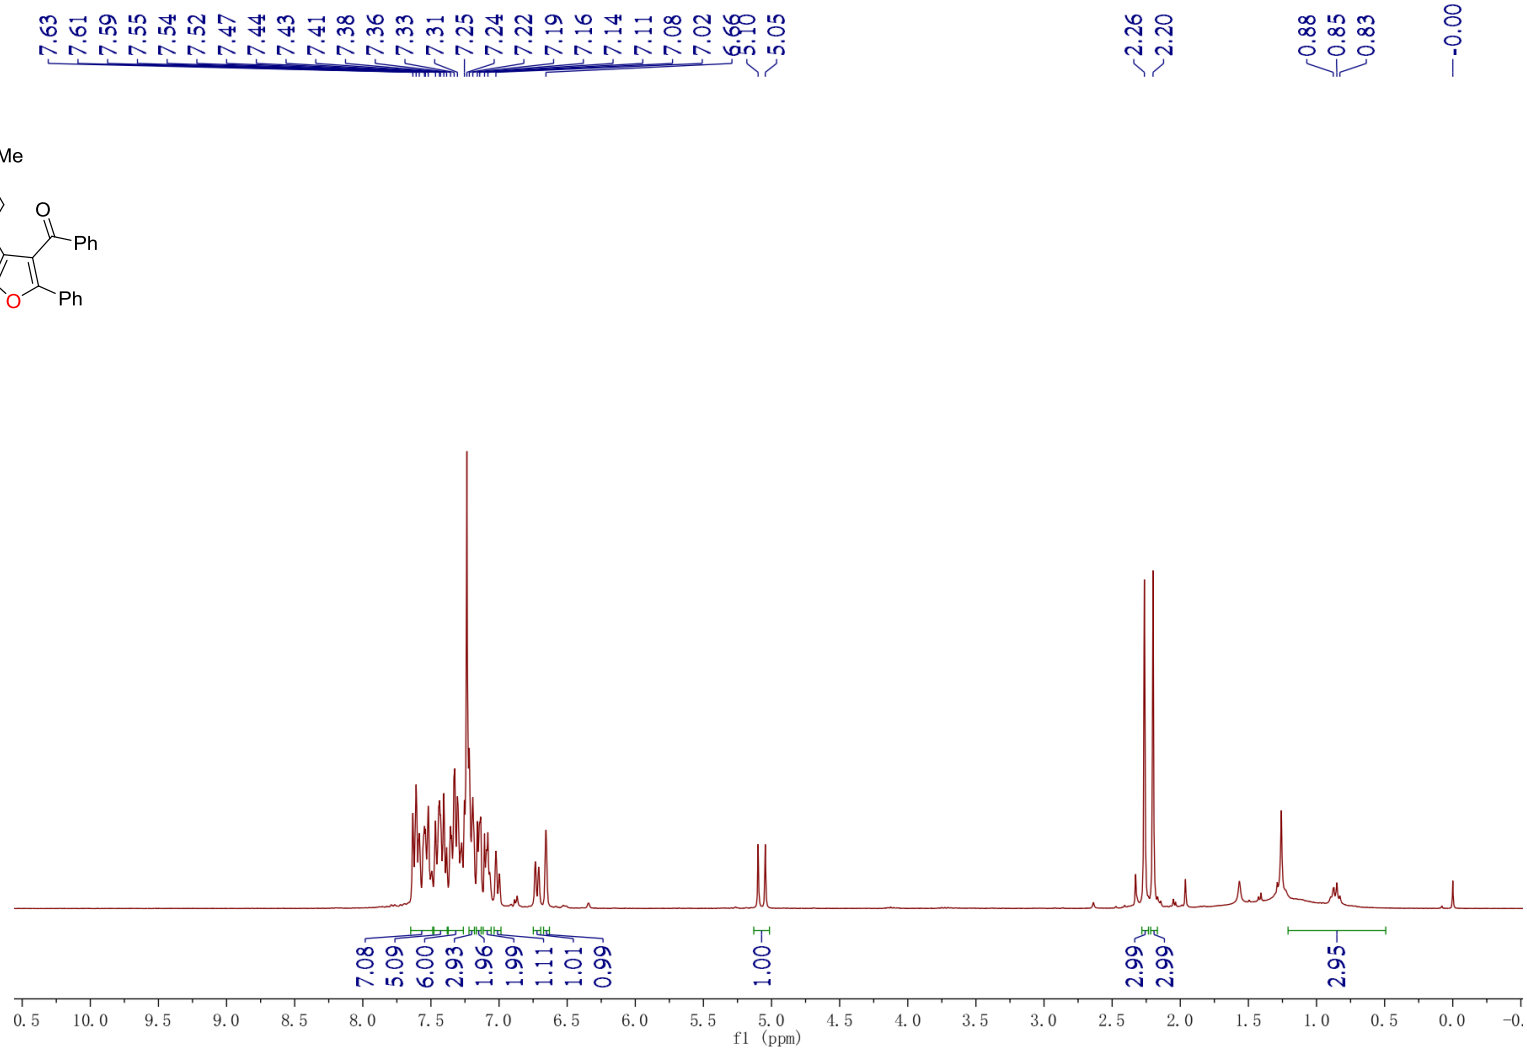

$^1\text{H}$  NMR ( $\text{CDCl}_3$ , 300 MHz) of compound **3f**

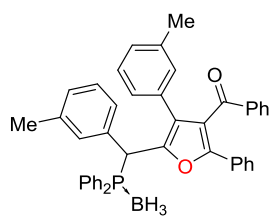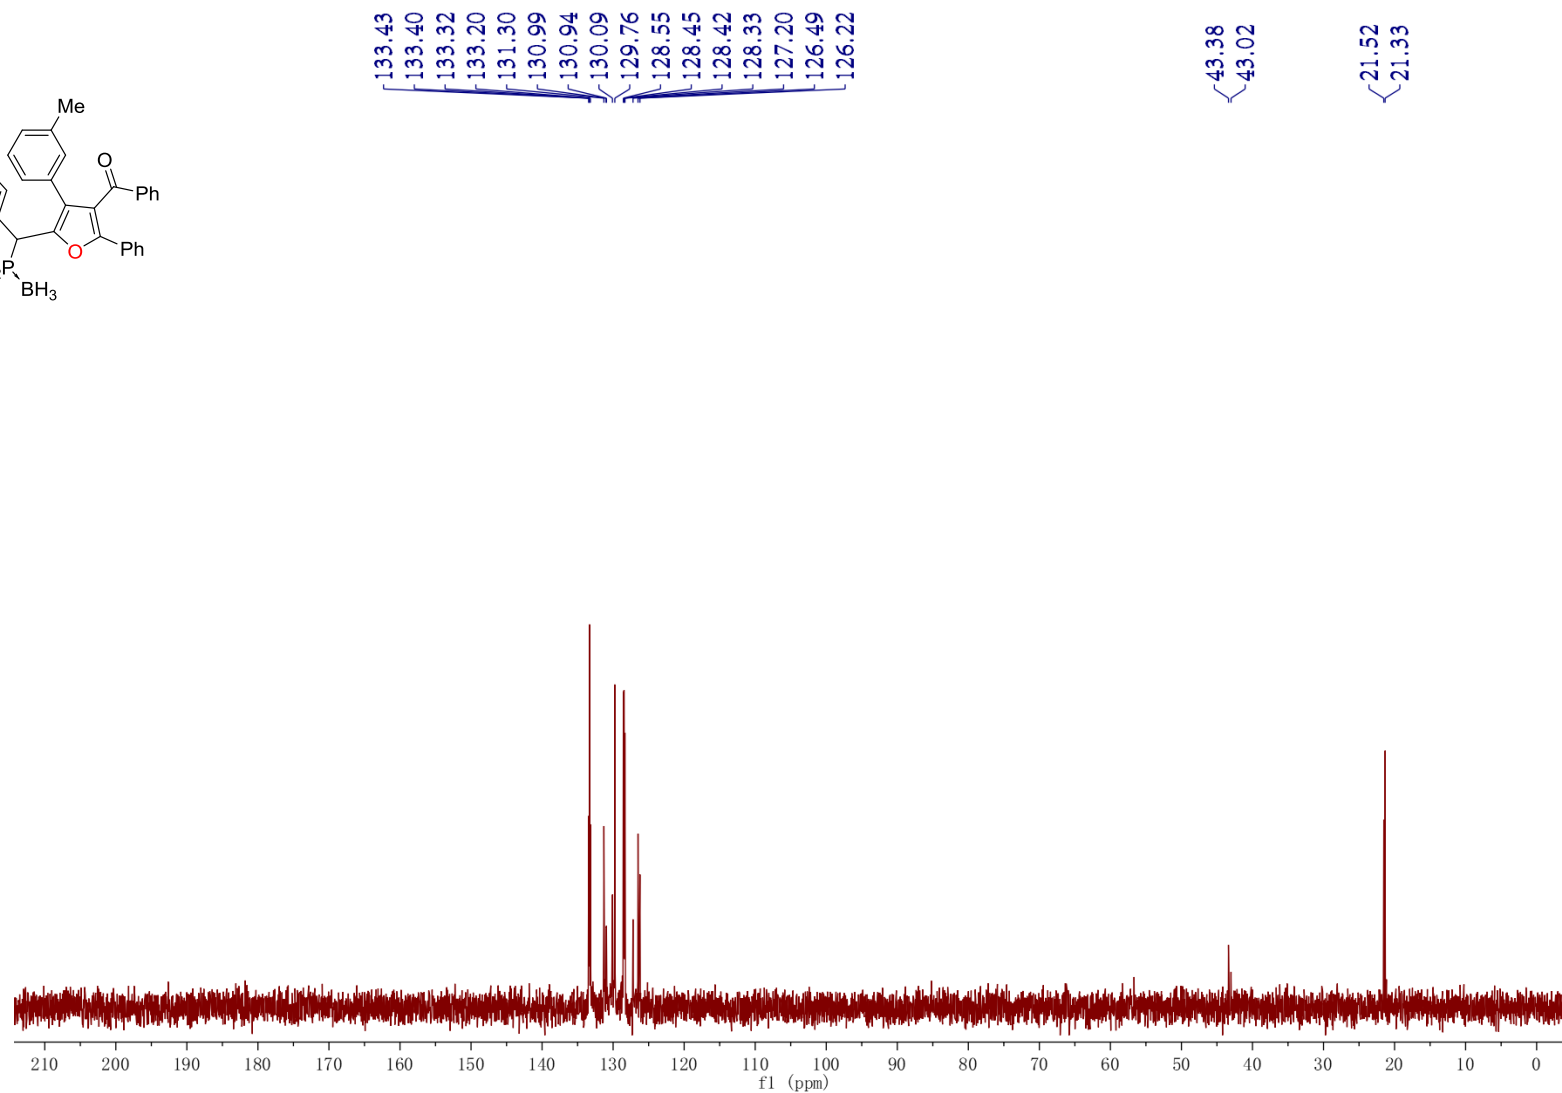

Dept 135 NMR (CDCl<sub>3</sub>, 101 MHz) of Compound 3f

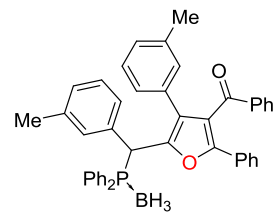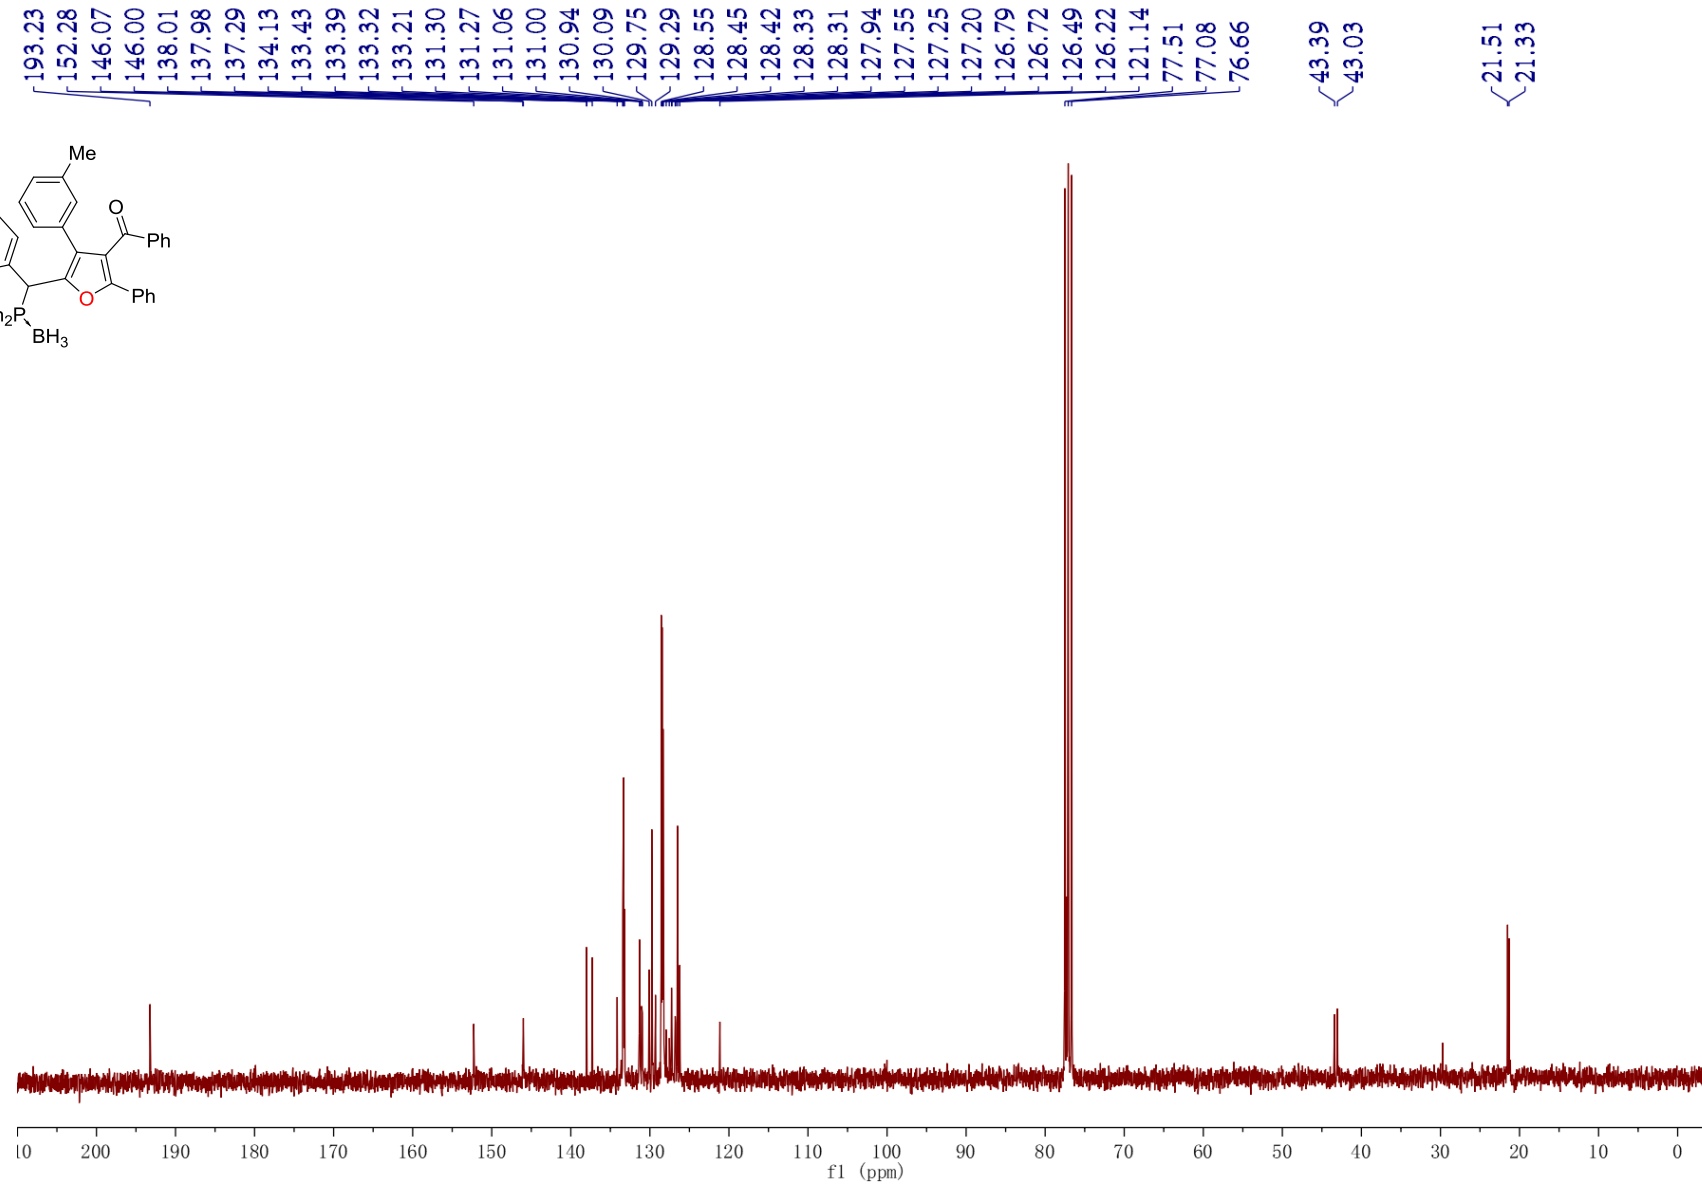

$^{13}\text{C} \{^1\text{H}\}$  NMR ( $\text{CDCl}_3$ , 75 MHz) of compound **3f**

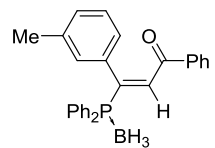

—26,48

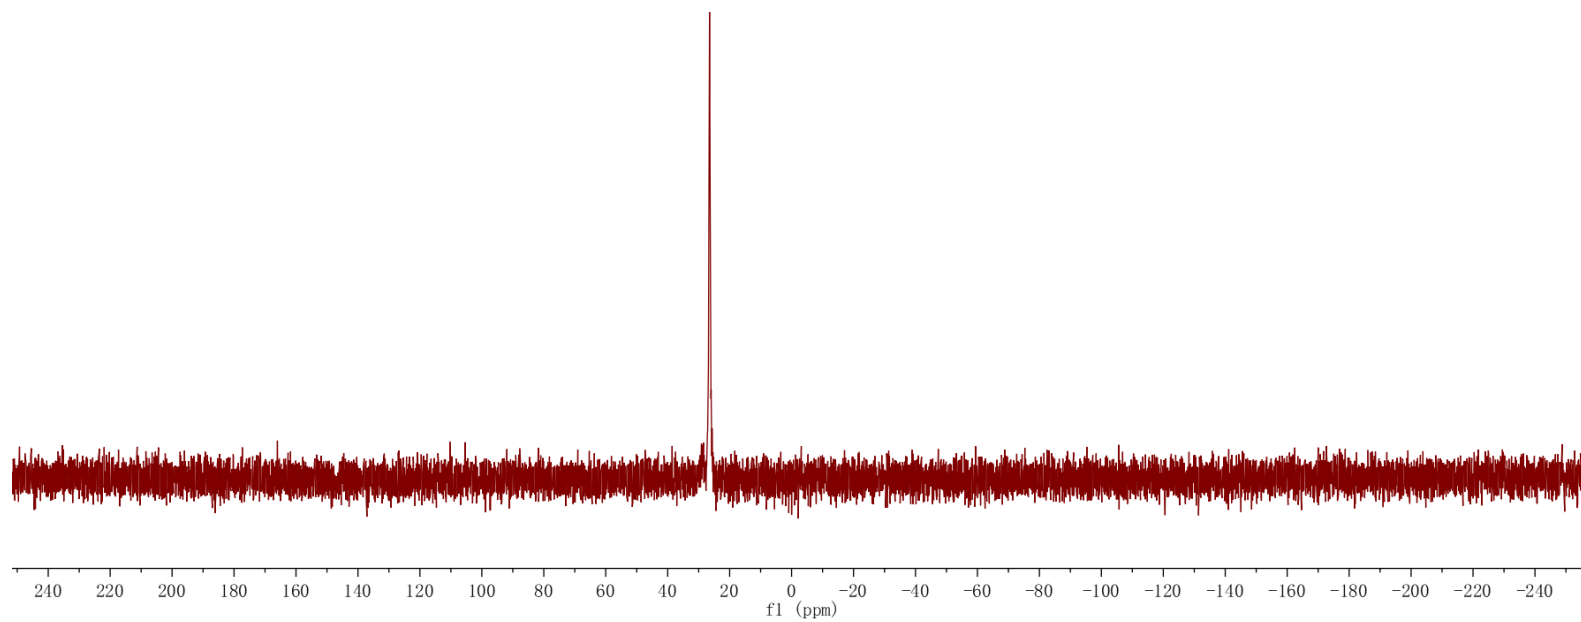

<sup>31</sup>P {<sup>1</sup>H} NMR (CDCl<sub>3</sub>, 121 MHz) of compound 3f'

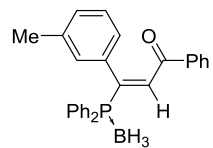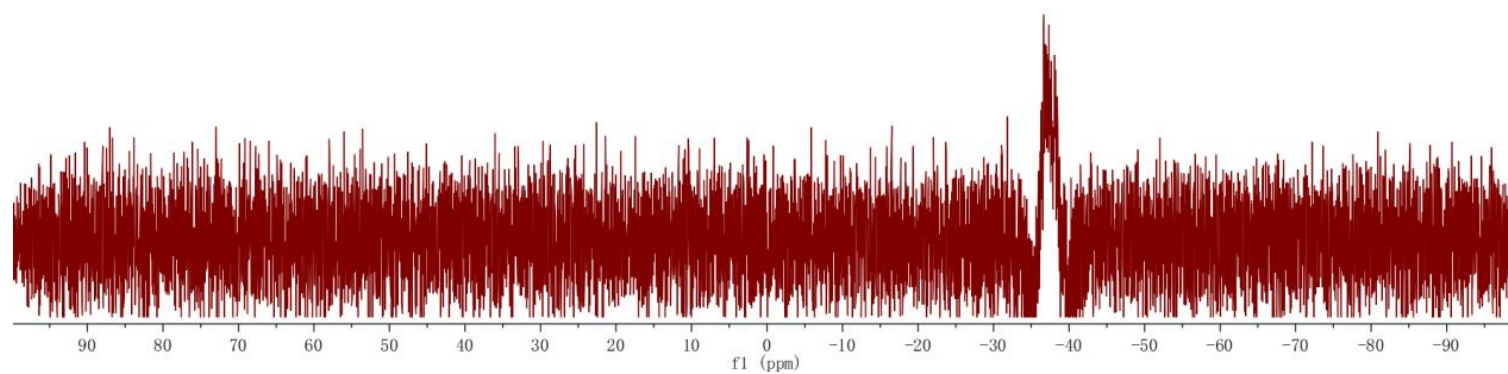

$^{11}\text{B} \{^1\text{H}\}$  NMR ( $\text{CDCl}_3$ , 128 MHz) of compound **3f'**

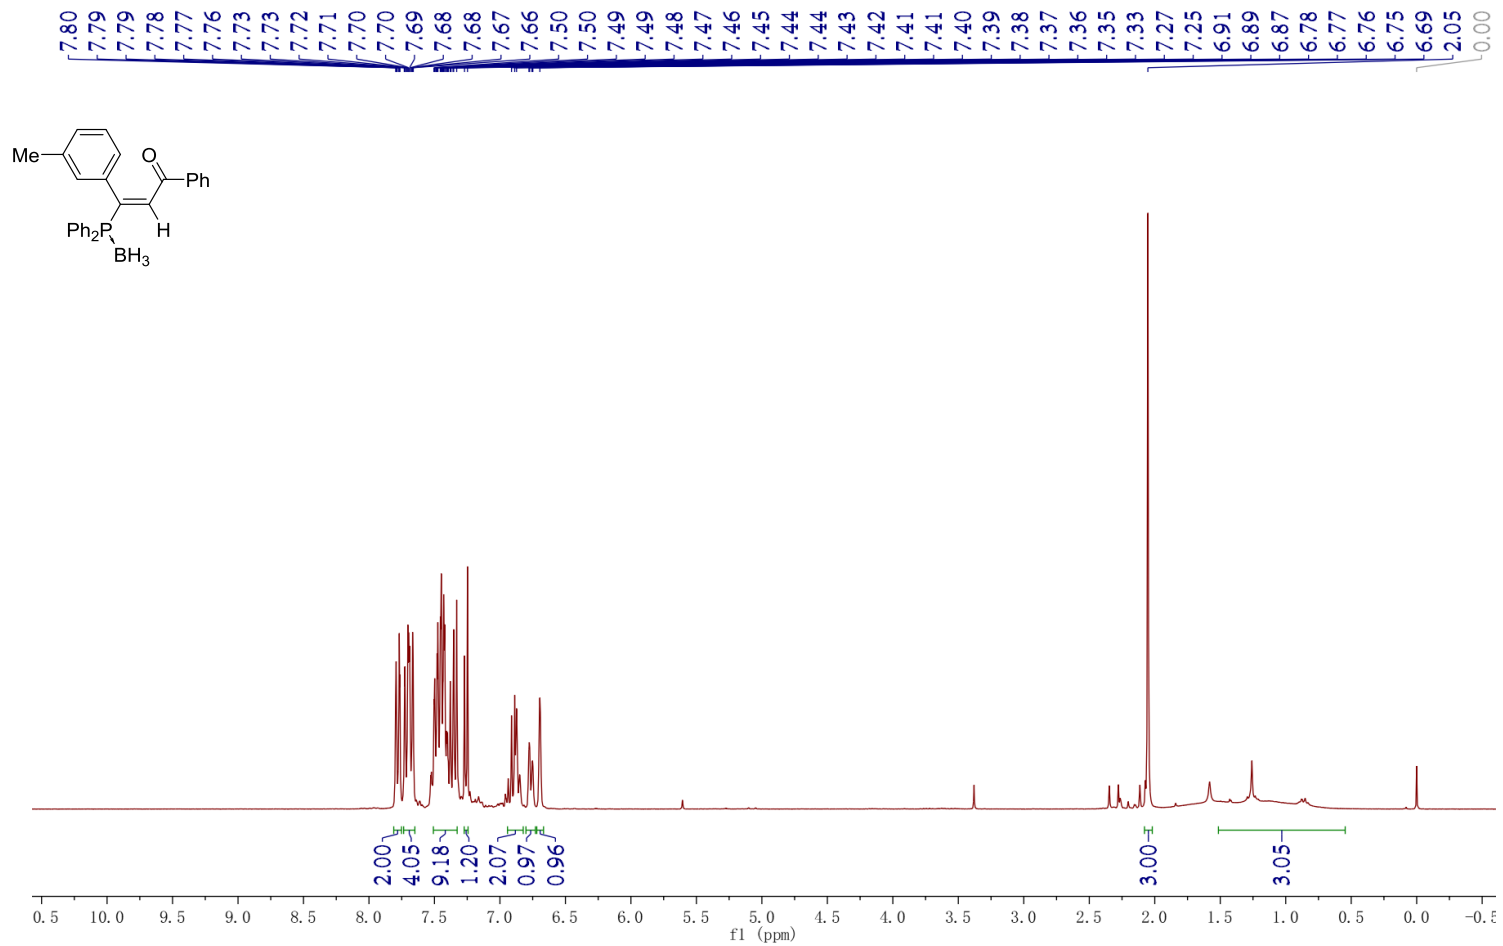

$^1\text{H}$  NMR (CDCl<sub>3</sub>, 300 MHz) of compound **3f'**

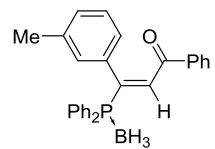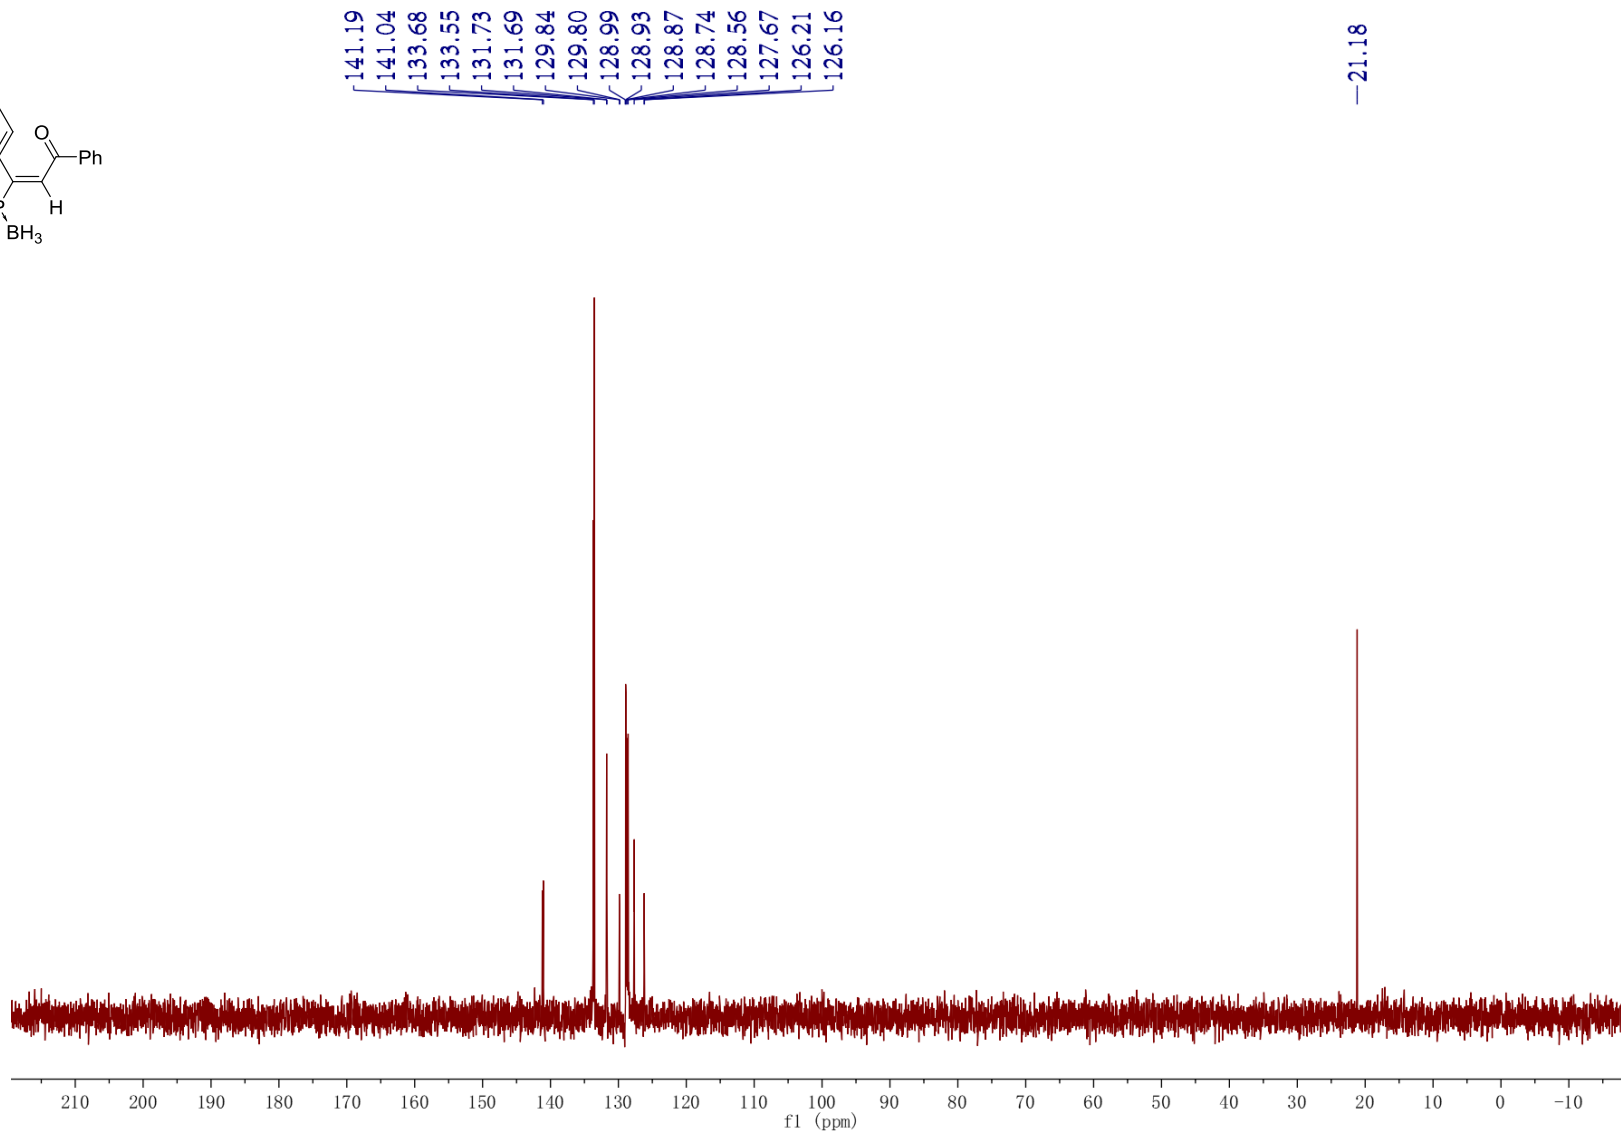

Dept 135 NMR (CDCl<sub>3</sub>, 101 MHz) of compound 3f'



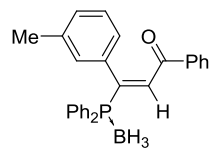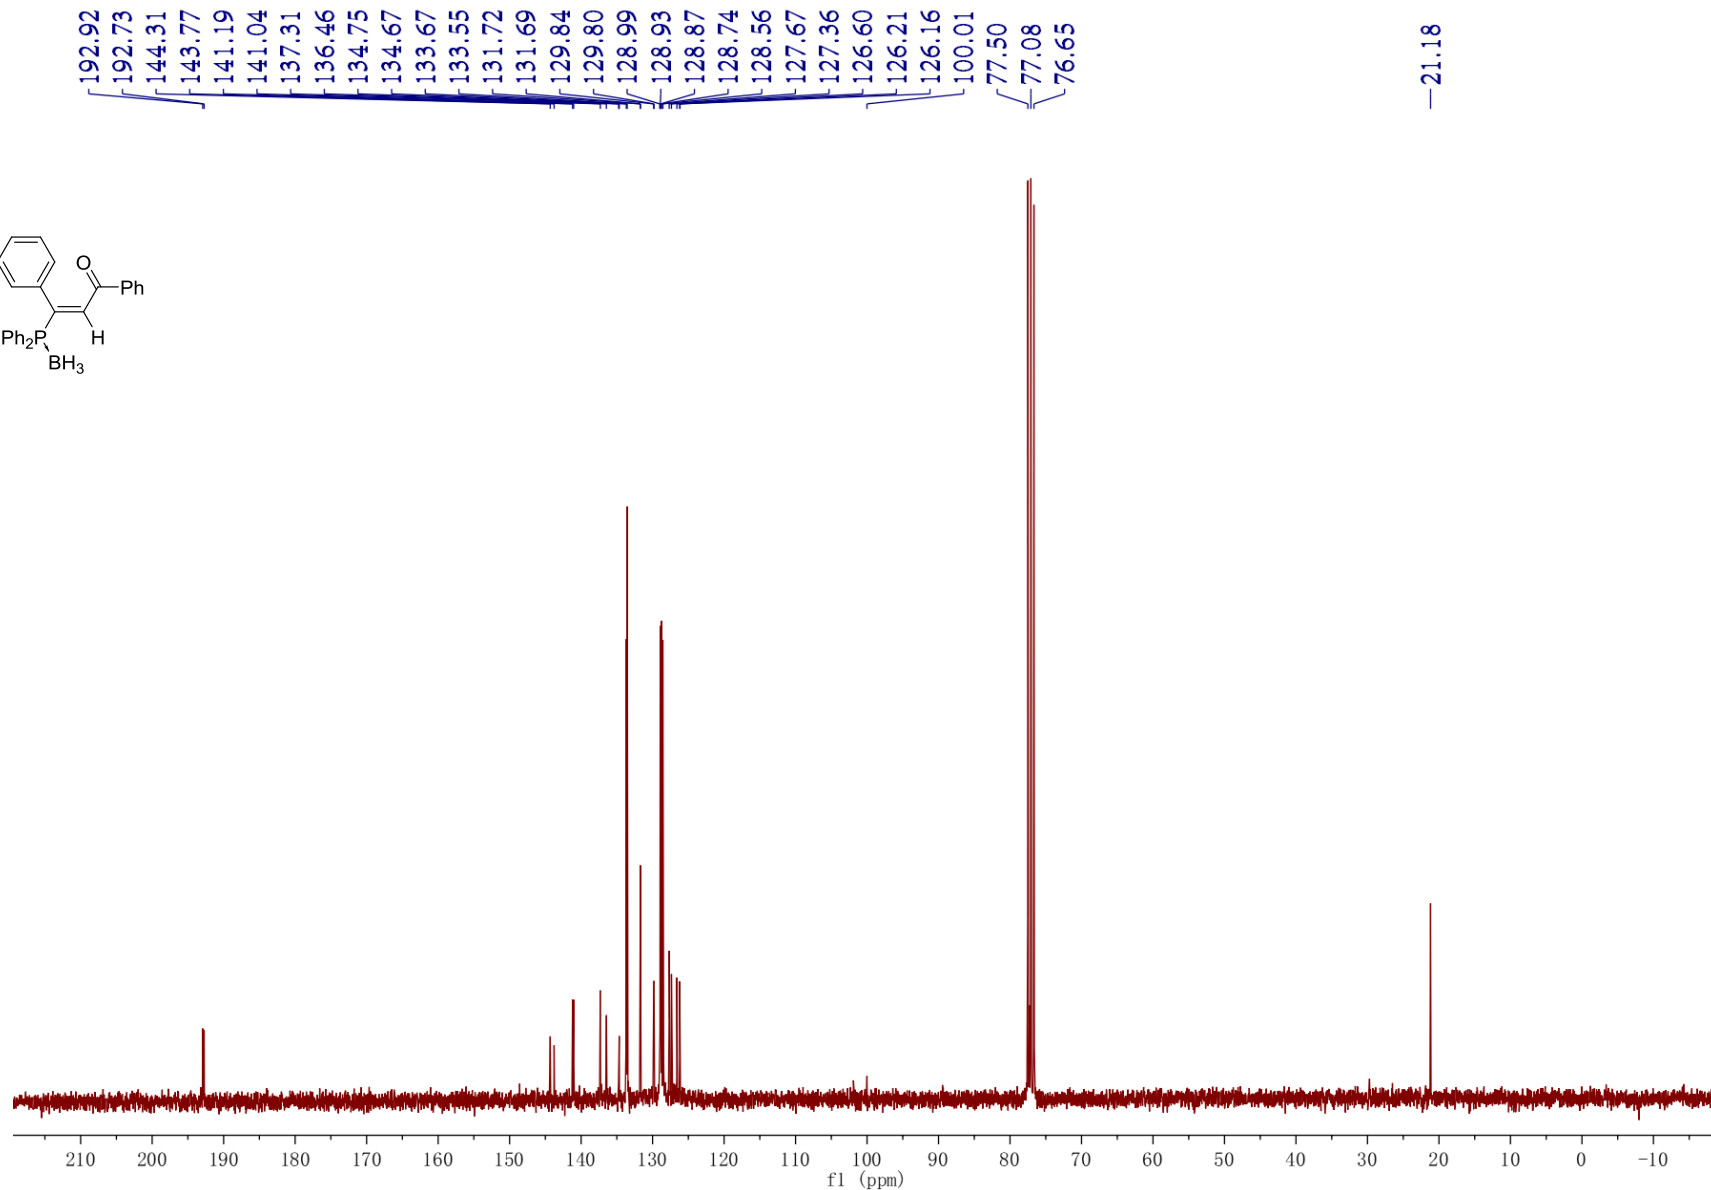

$^{13}\text{C}$   $\{^1\text{H}\}$  NMR ( $\text{CDCl}_3$ , 75 MHz) of compound **3f'**

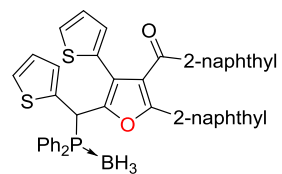

—29.68

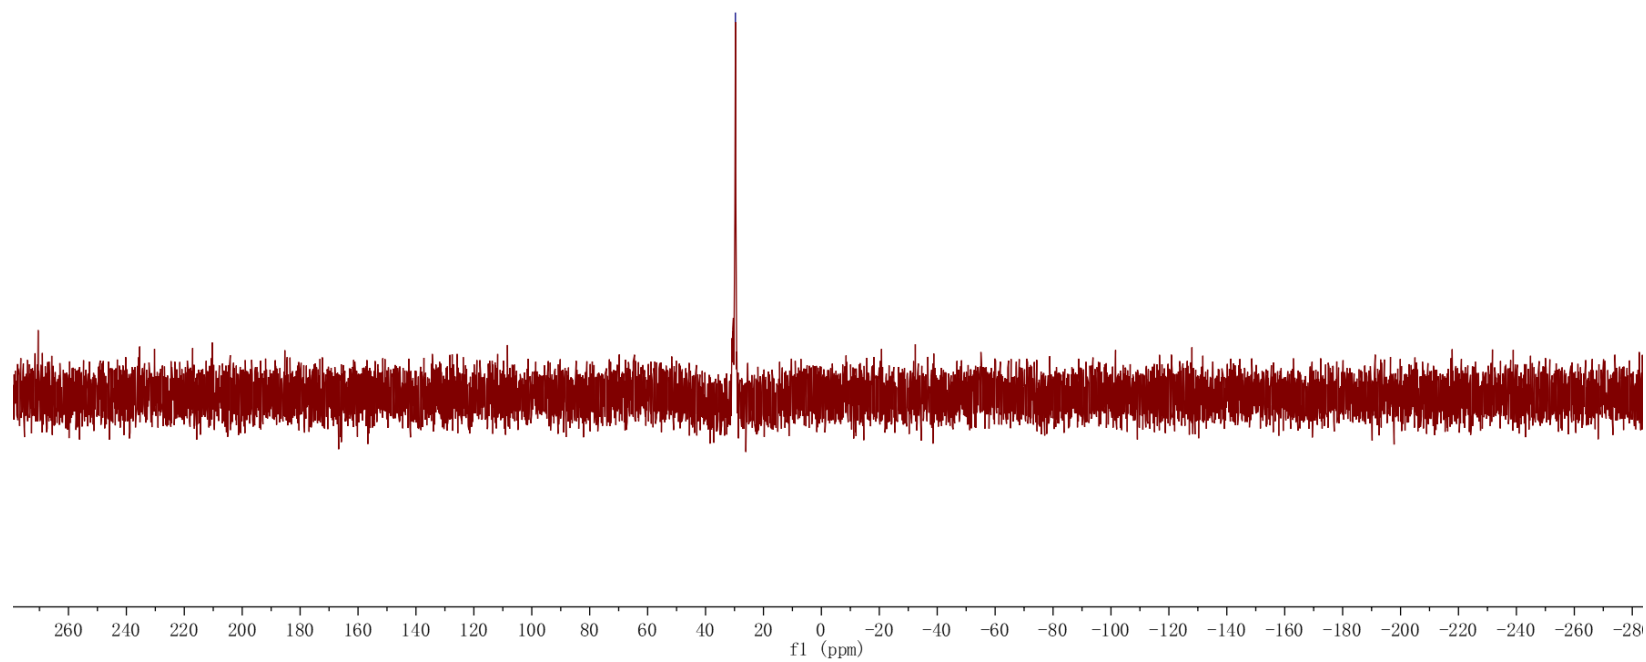

<sup>31</sup>P {<sup>1</sup>H} NMR (CDCl<sub>3</sub>, 121 MHz) of compound **3g**

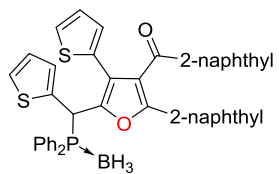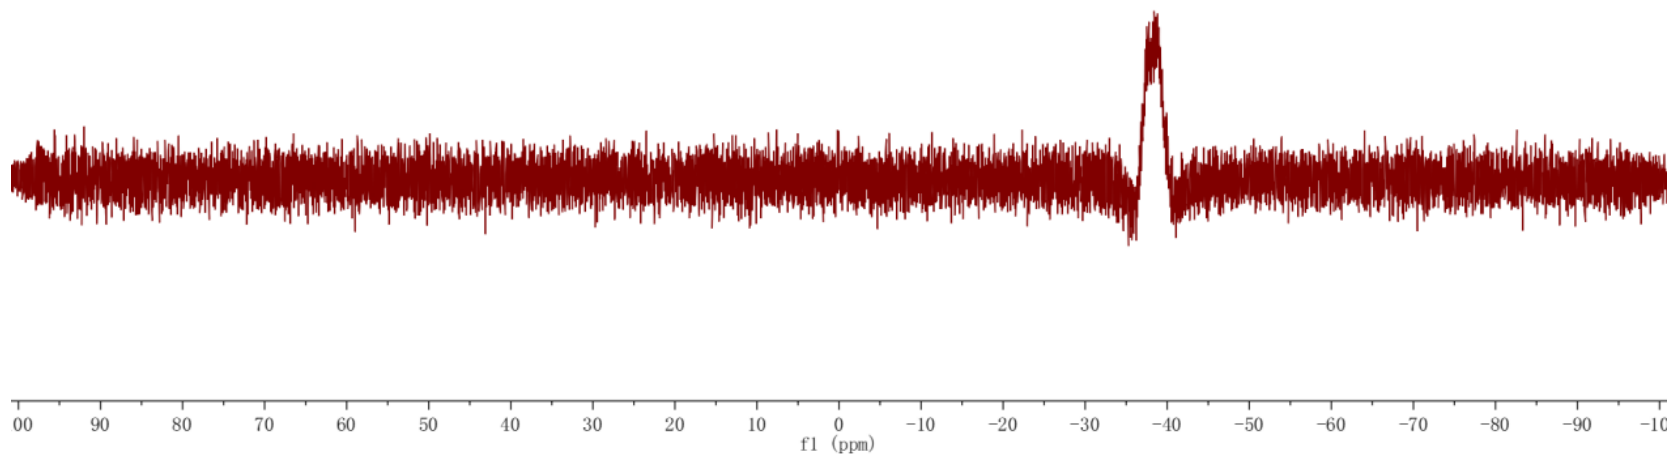

--38.56

<sup>11</sup>B {<sup>1</sup>H} NMR (CDCl<sub>3</sub>, 128 MHz) of compound 3g

8.32  
7.97  
7.93  
7.83  
7.80  
7.79  
7.76  
7.71  
7.68  
7.65  
7.62  
7.59  
7.56  
7.53  
7.51  
7.47  
7.45  
7.43  
7.25  
7.19  
7.17  
7.16  
7.14  
7.07  
6.94  
6.93  
6.92  
6.85  
6.84  
6.83  
6.77  
5.84

0.88  
0.86  
0.84

-0.00

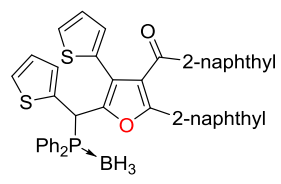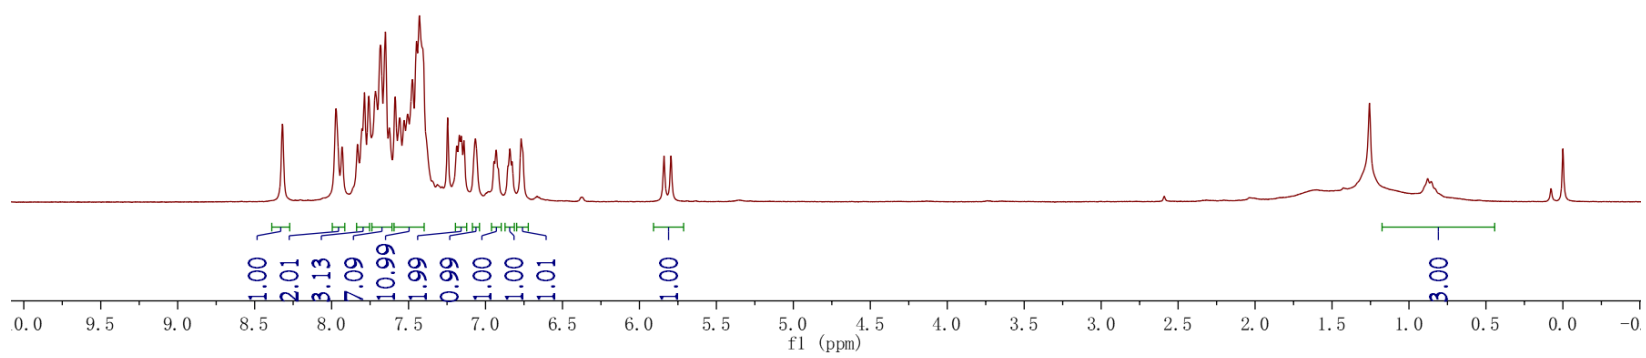

<sup>1</sup>H NMR (CDCl<sub>3</sub>, 300 MHz) of compound **3g**

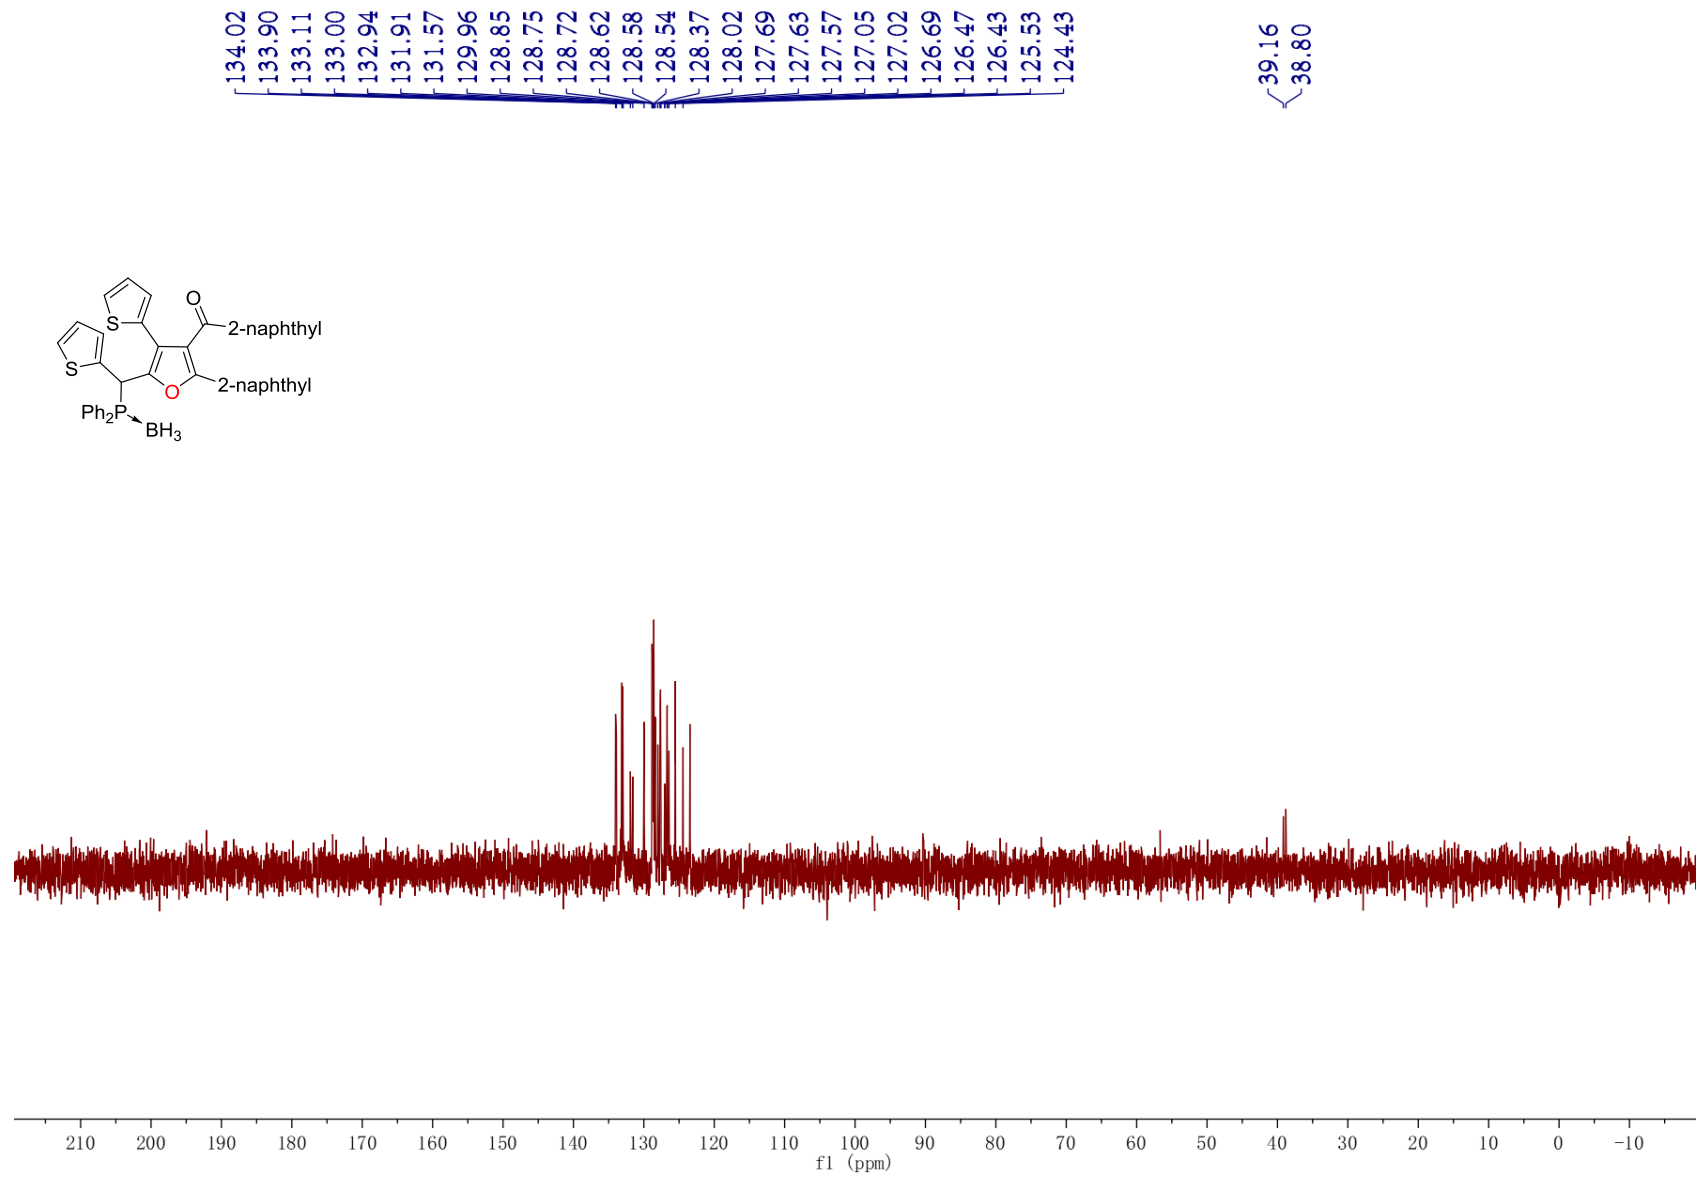

Dept 135 NMR (CDCl<sub>3</sub>, 75 MHz) of Compound **3g**

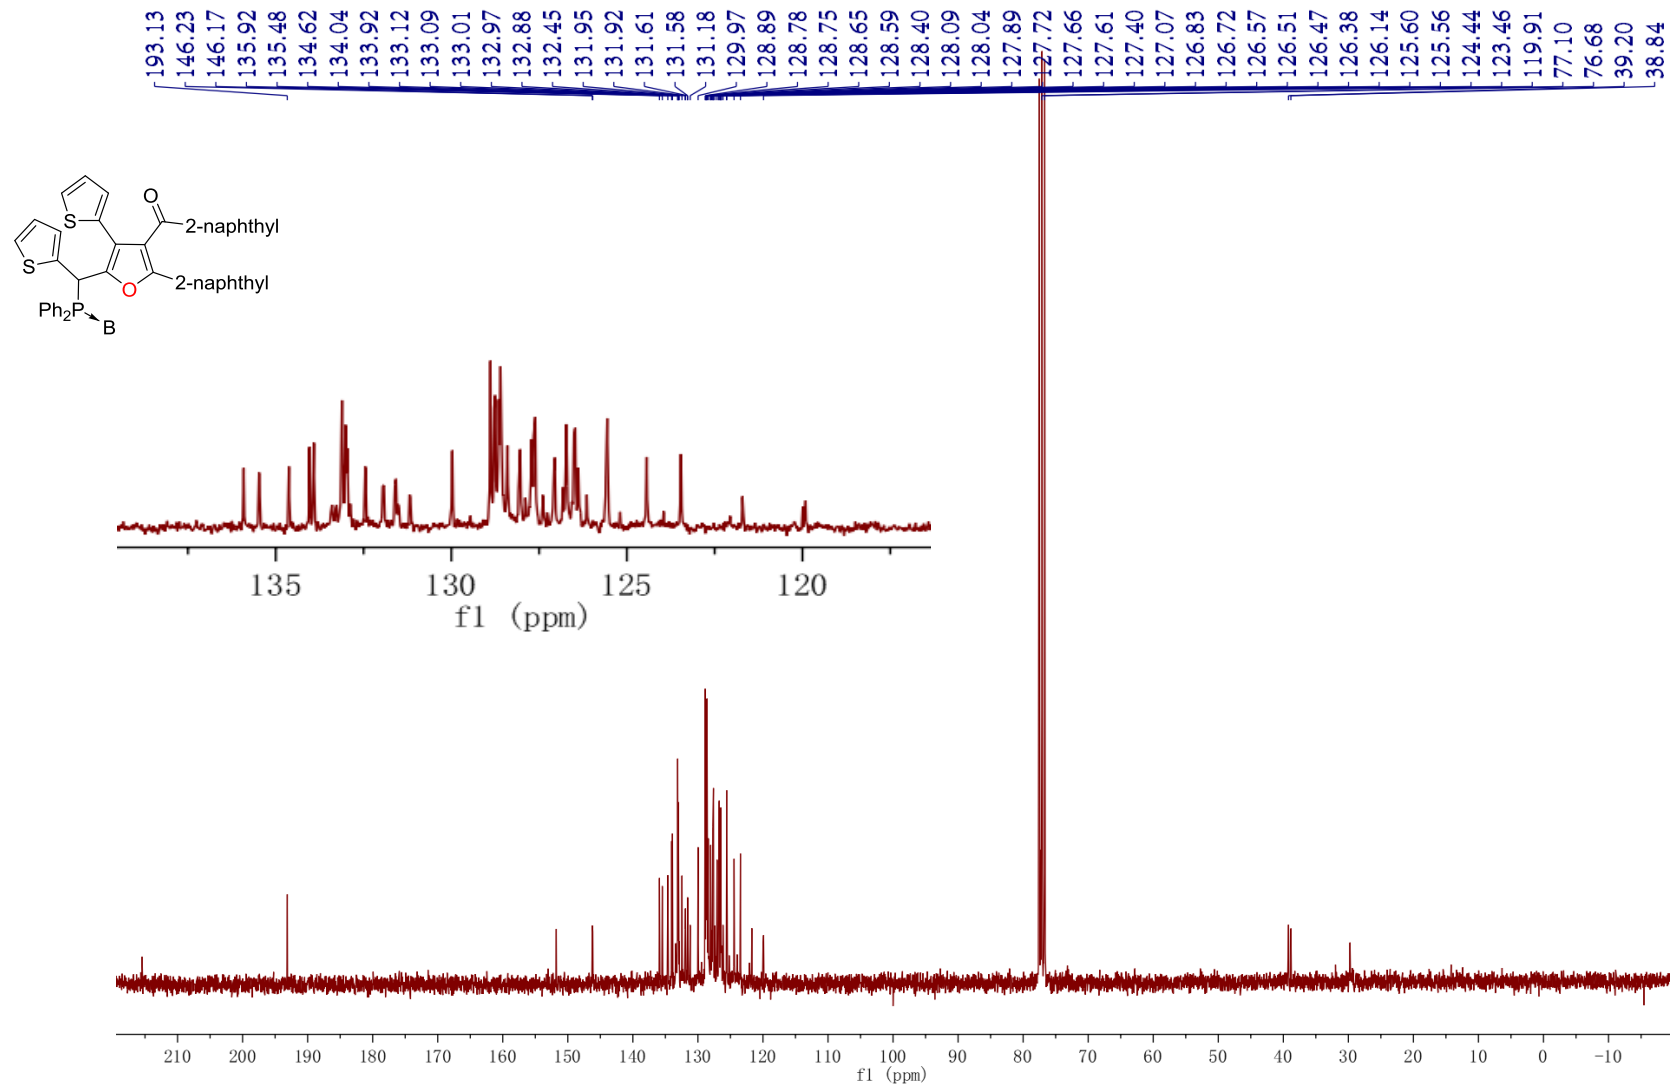

$^{13}\text{C}$   $\{^1\text{H}\}$  NMR (CDCl<sub>3</sub>, 75 MHz) of compound **3g**

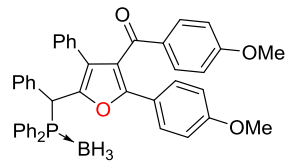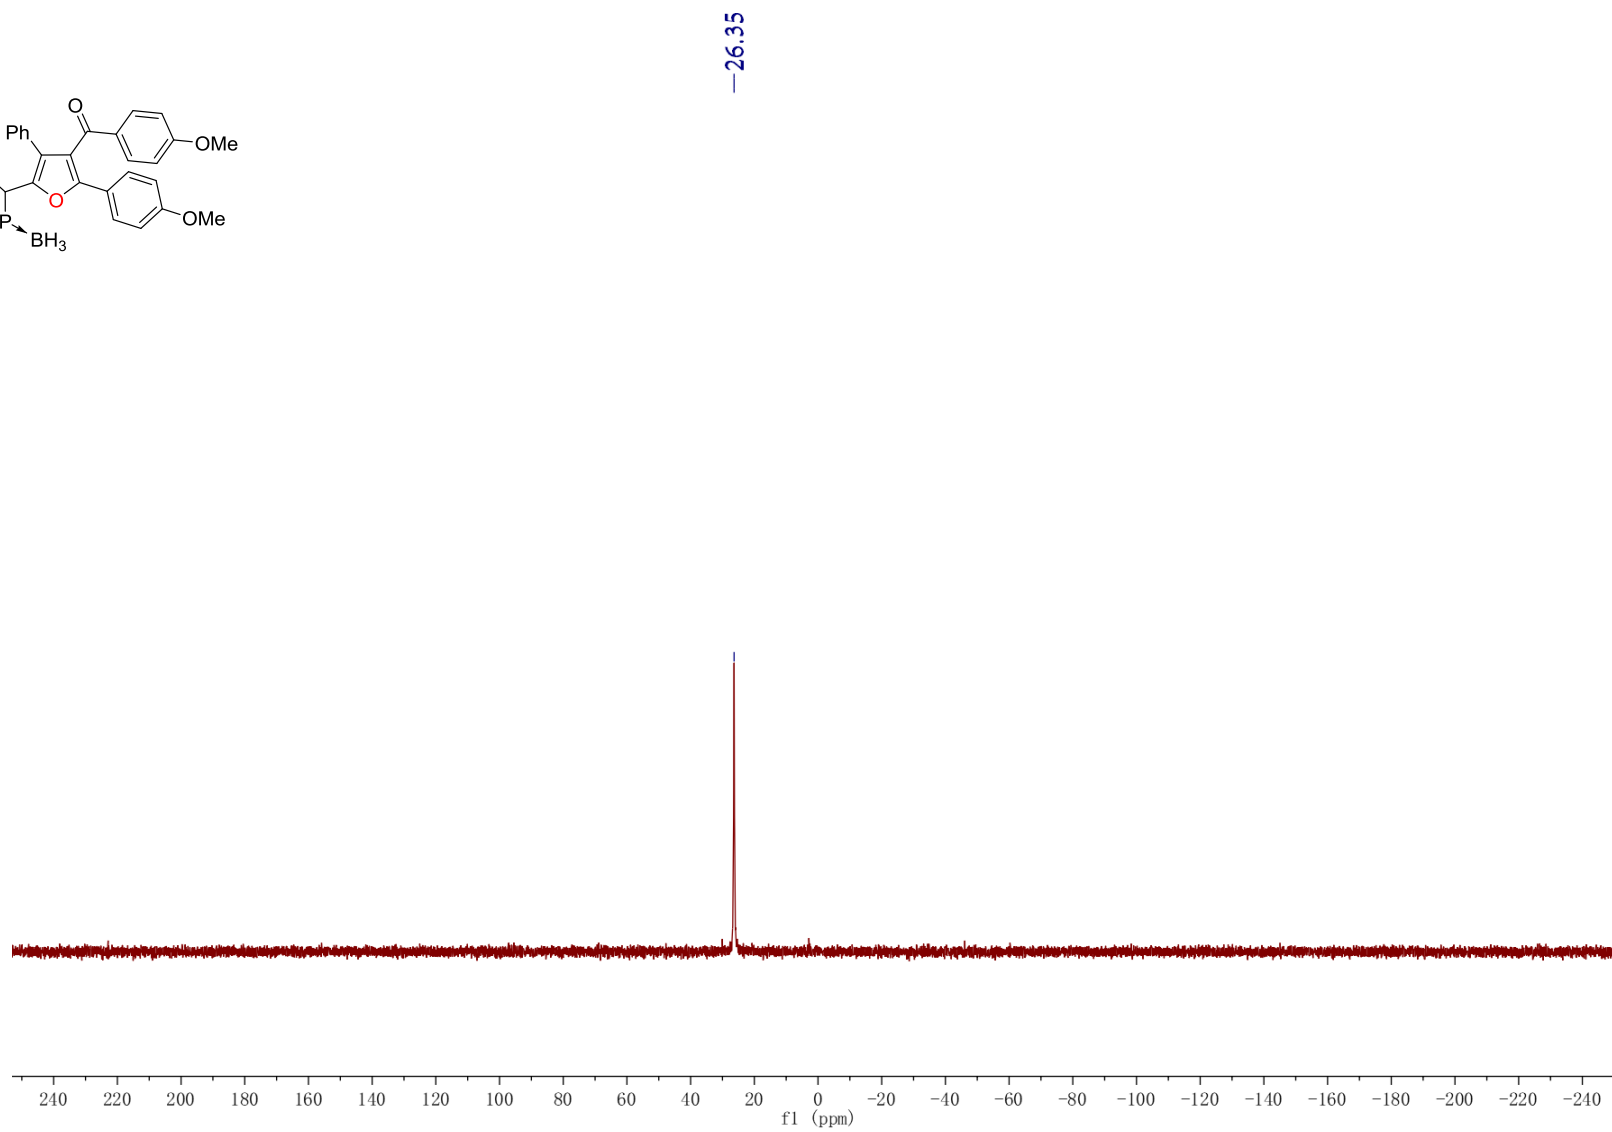

<sup>31</sup>P {<sup>1</sup>H} NMR (CDCl<sub>3</sub>, 121 MHz) of compound **3h**





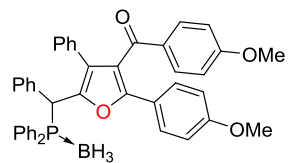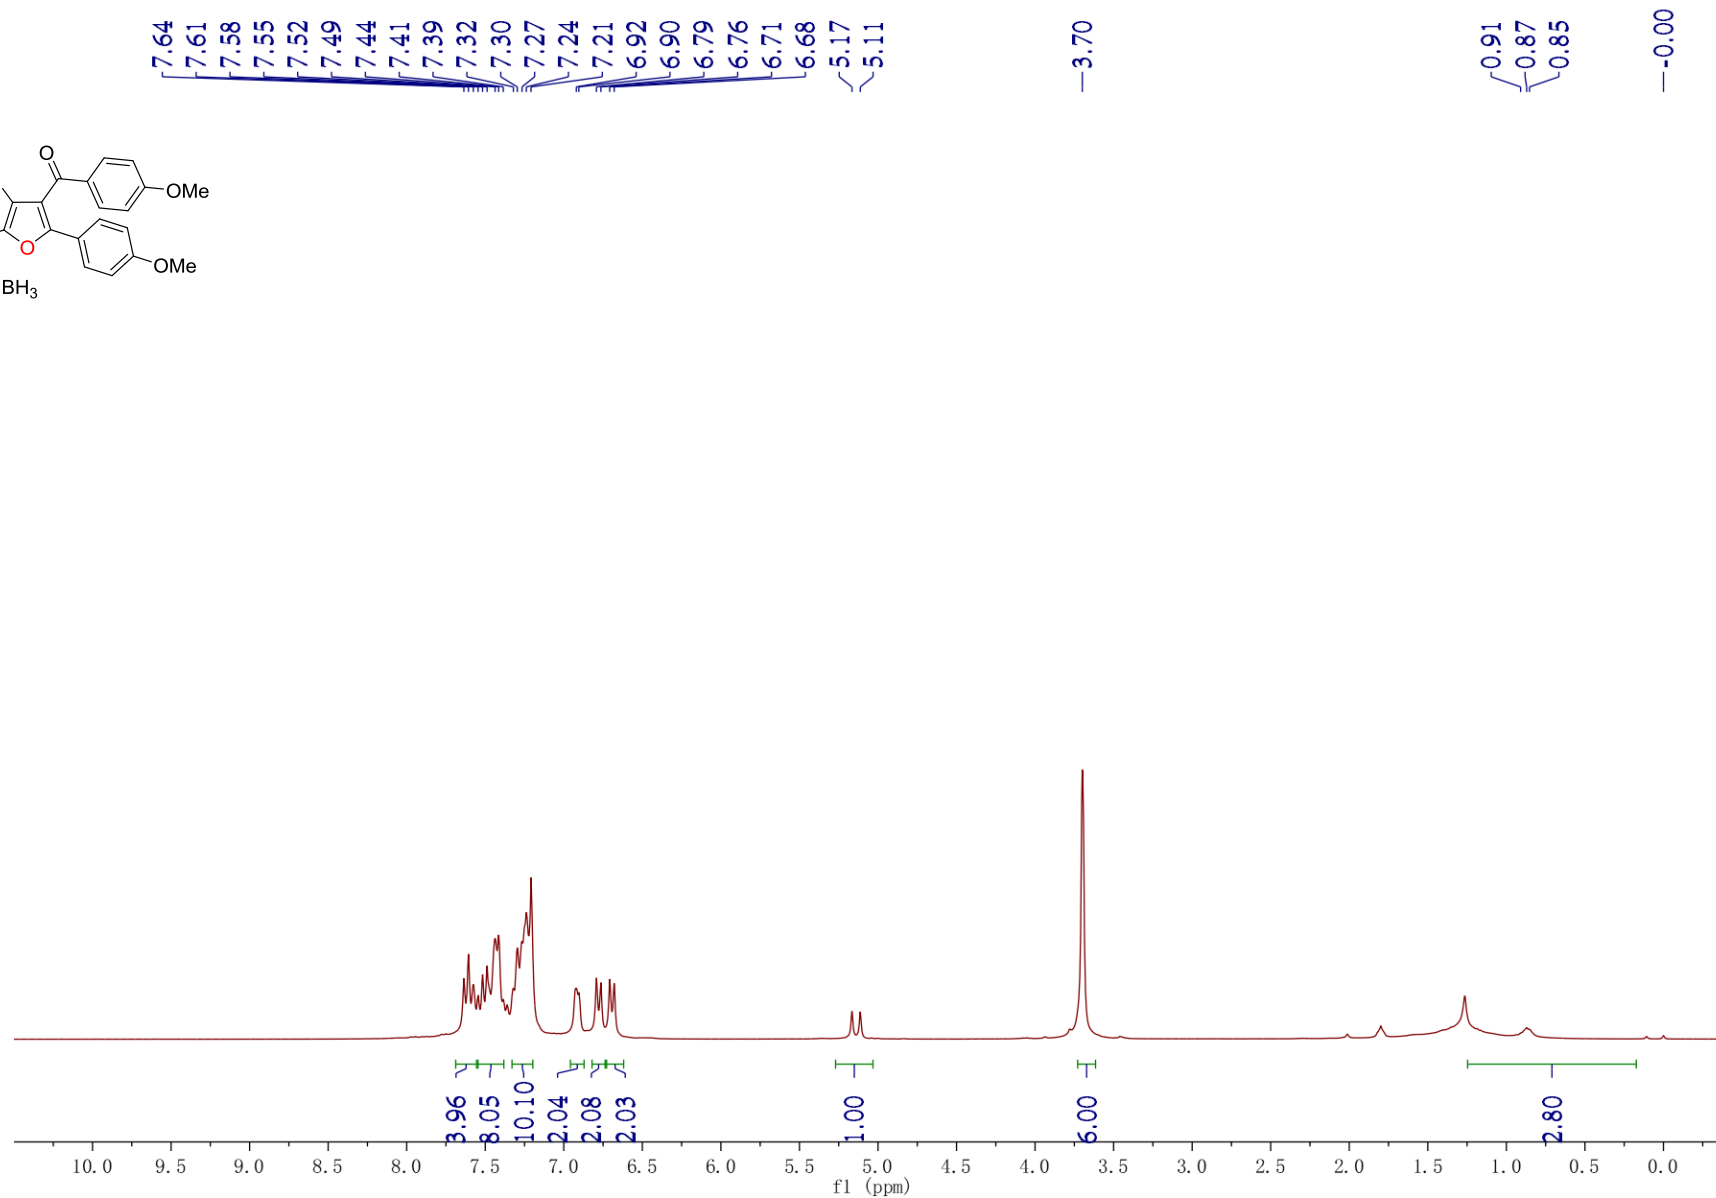

<sup>1</sup>H NMR (CDCl<sub>3</sub>, 300 MHz) of compound **3h**

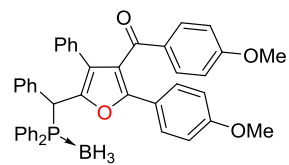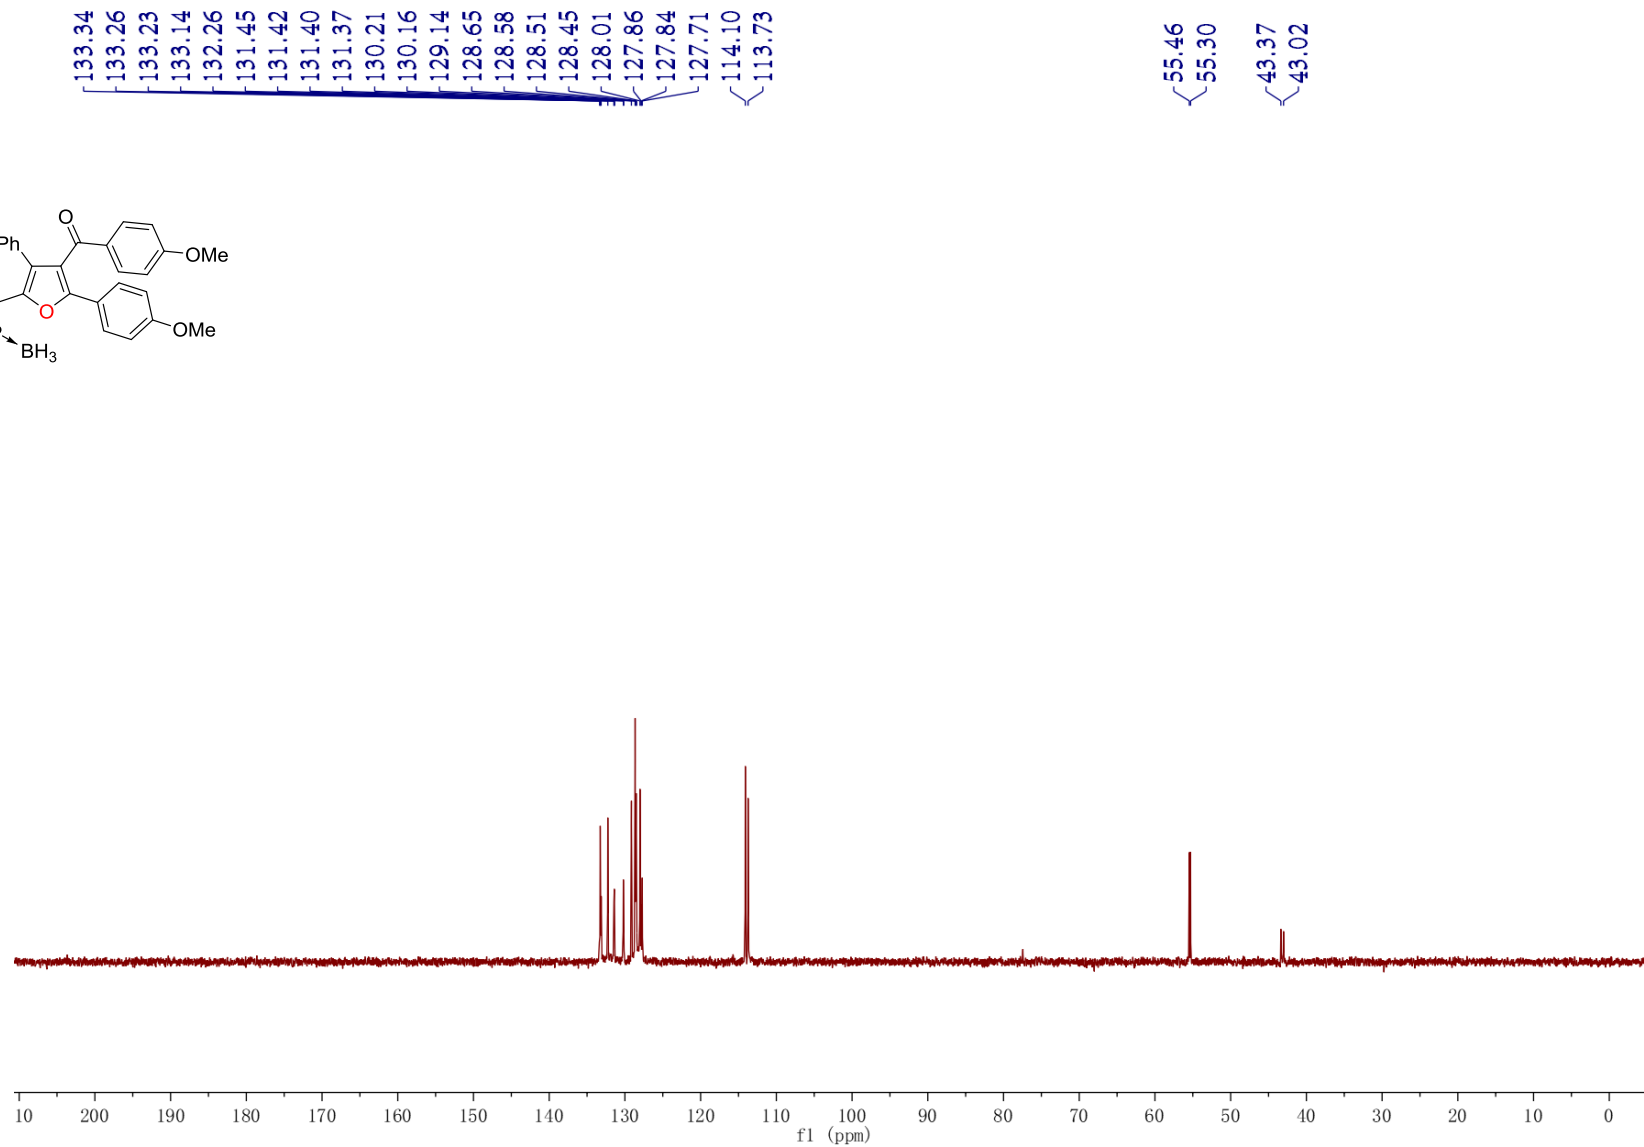

Dept 135 NMR (CDCl<sub>3</sub>, 75 MHz) of Compound **3h**

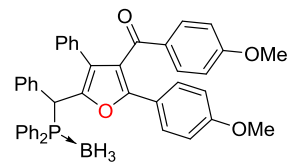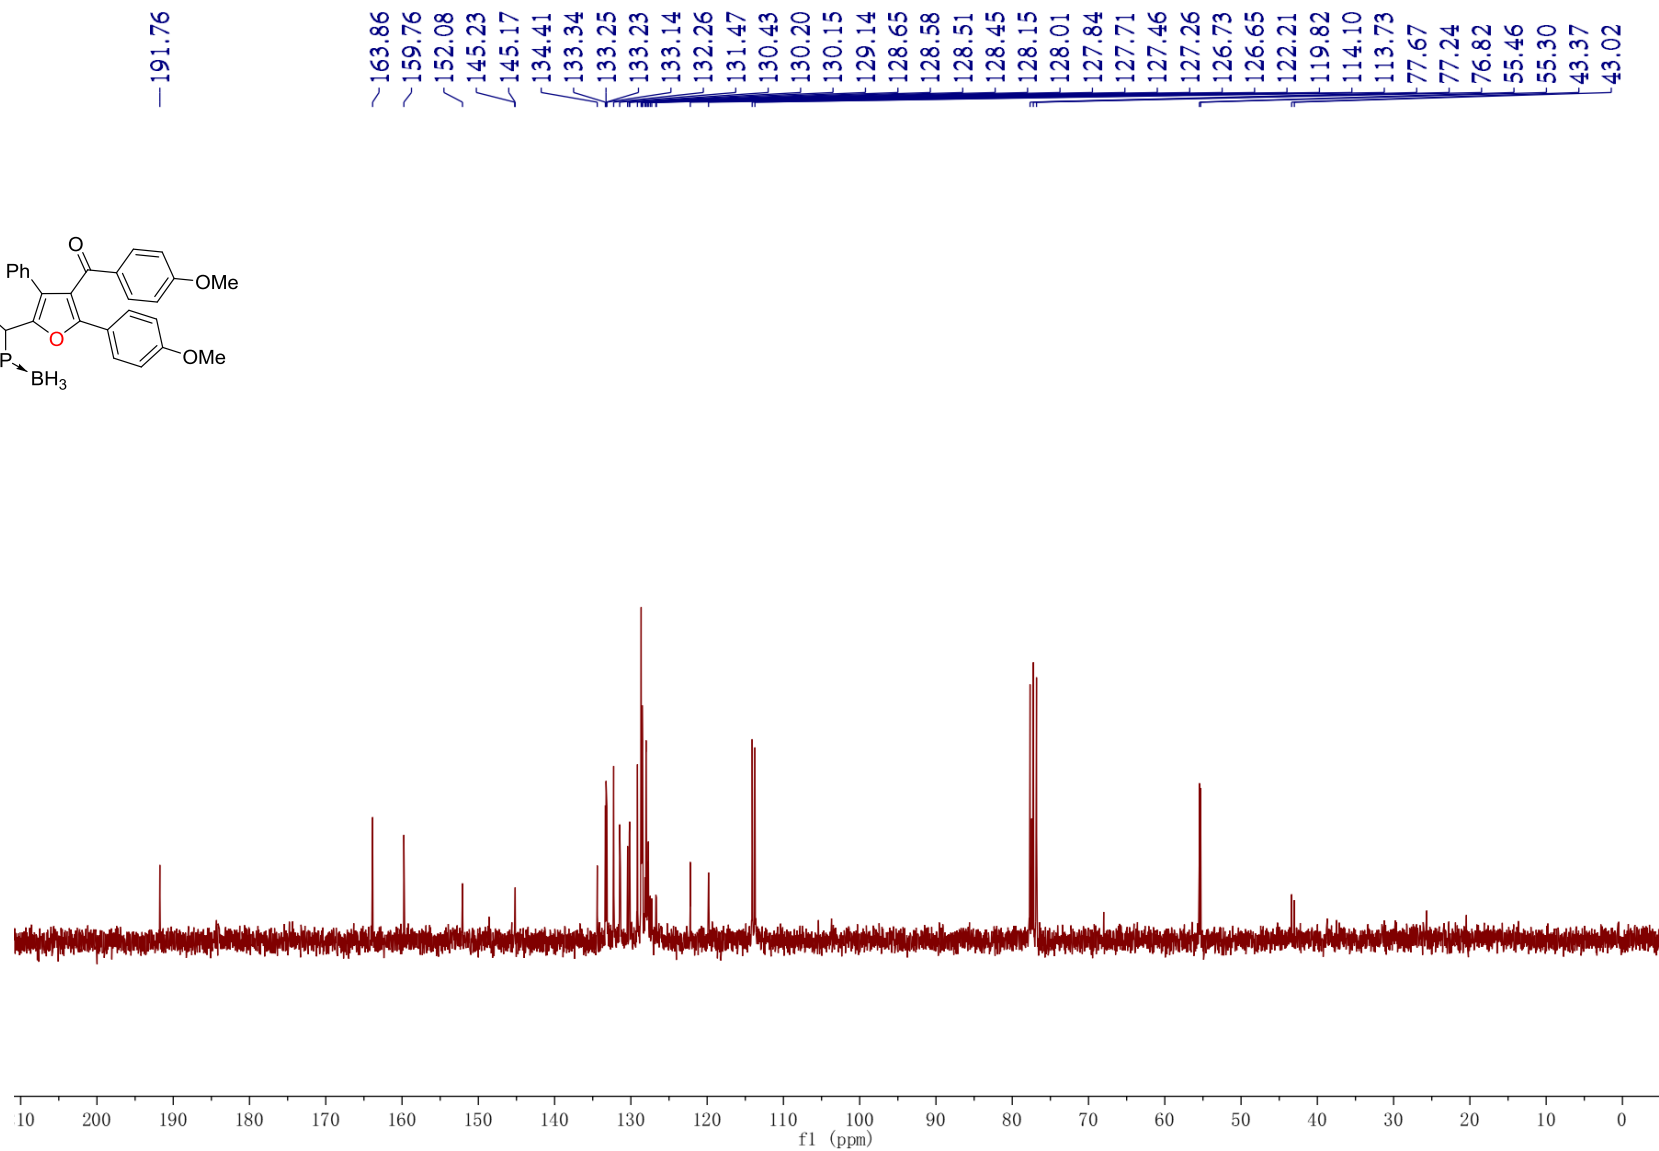

$^{13}\text{C} \{^1\text{H}\}$  NMR ( $\text{CDCl}_3$ , 75 MHz) of compound **3h**



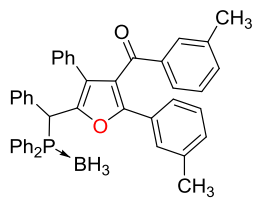

—39.21

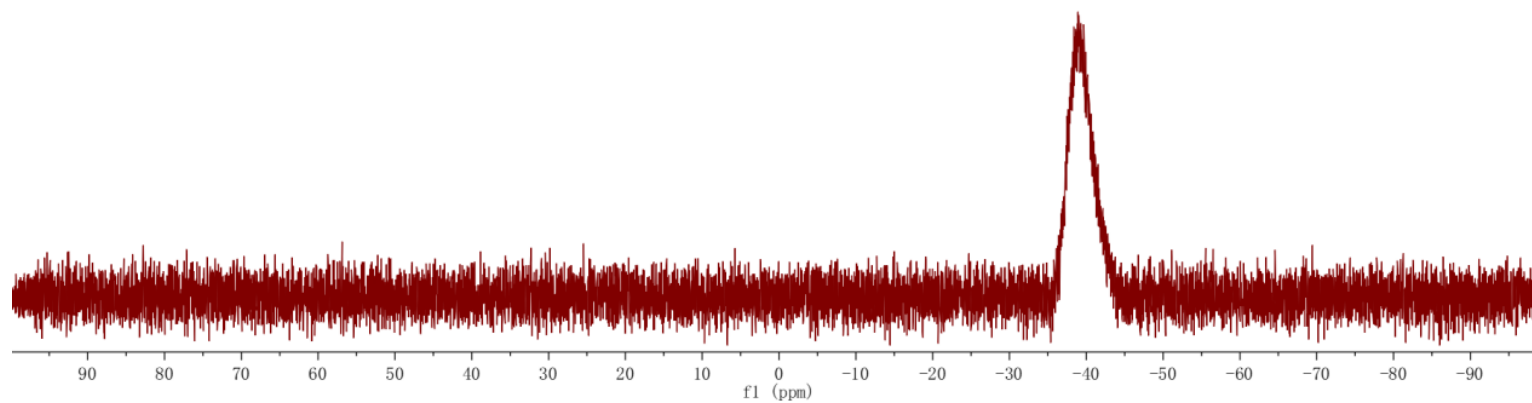

$^{11}\text{B}$   $\{^1\text{H}\}$  NMR ( $\text{CDCl}_3$ , 128 MHz) of compound **3i**

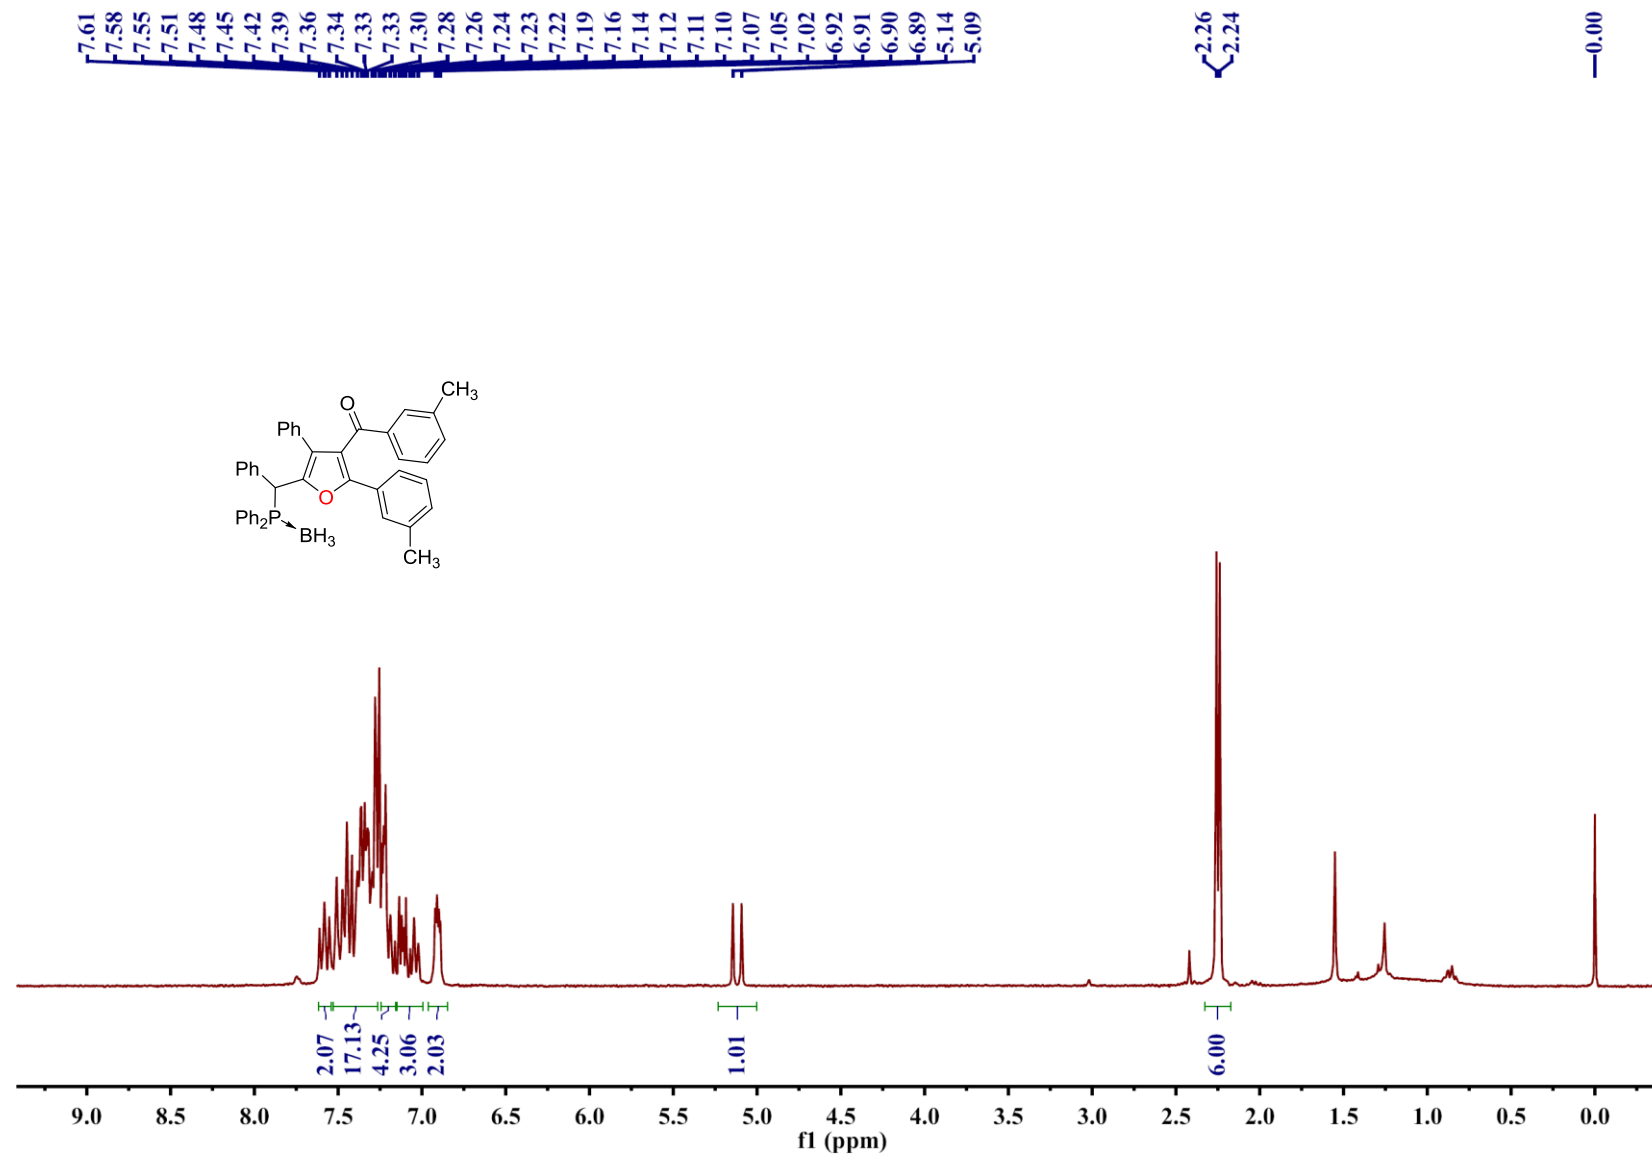

$^1\text{H}$  NMR ( $\text{CDCl}_3$ , 300 MHz) of compound **3i**

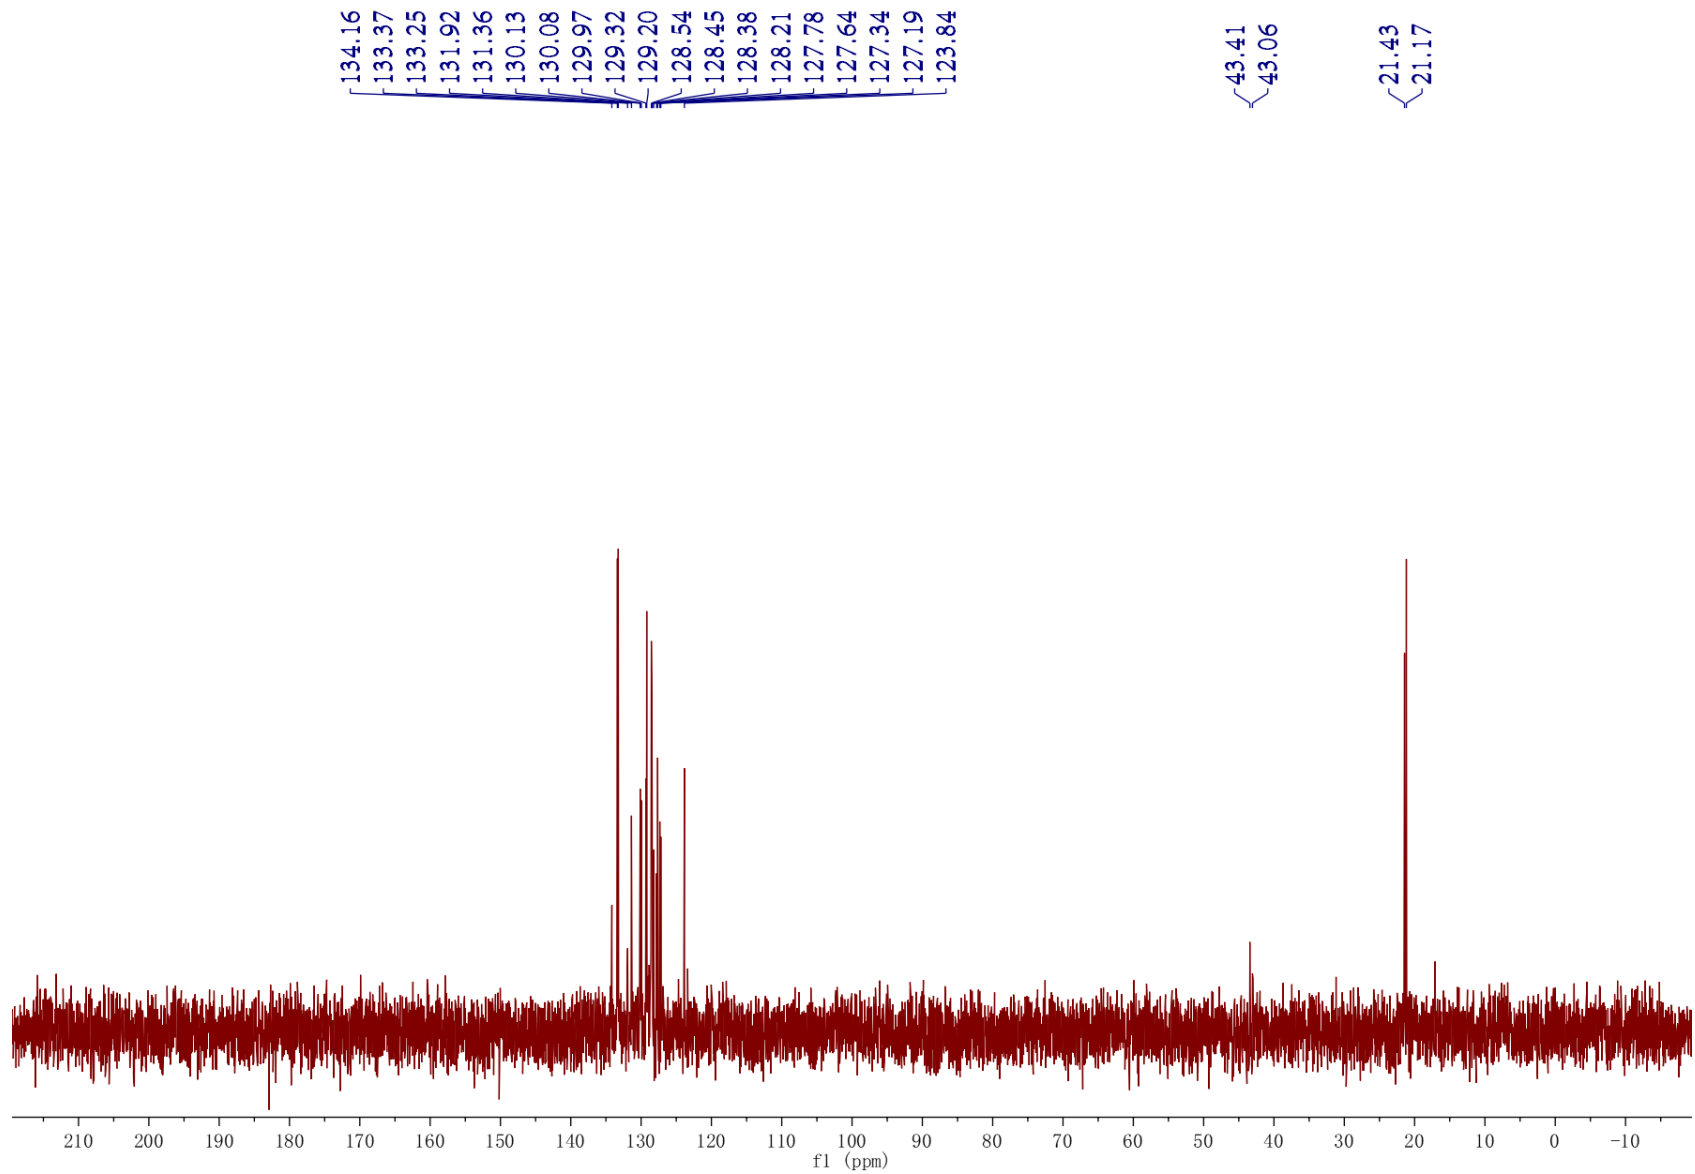

Dept 135 NMR (CDCl<sub>3</sub>, 101 MHz) of Compound **3i**

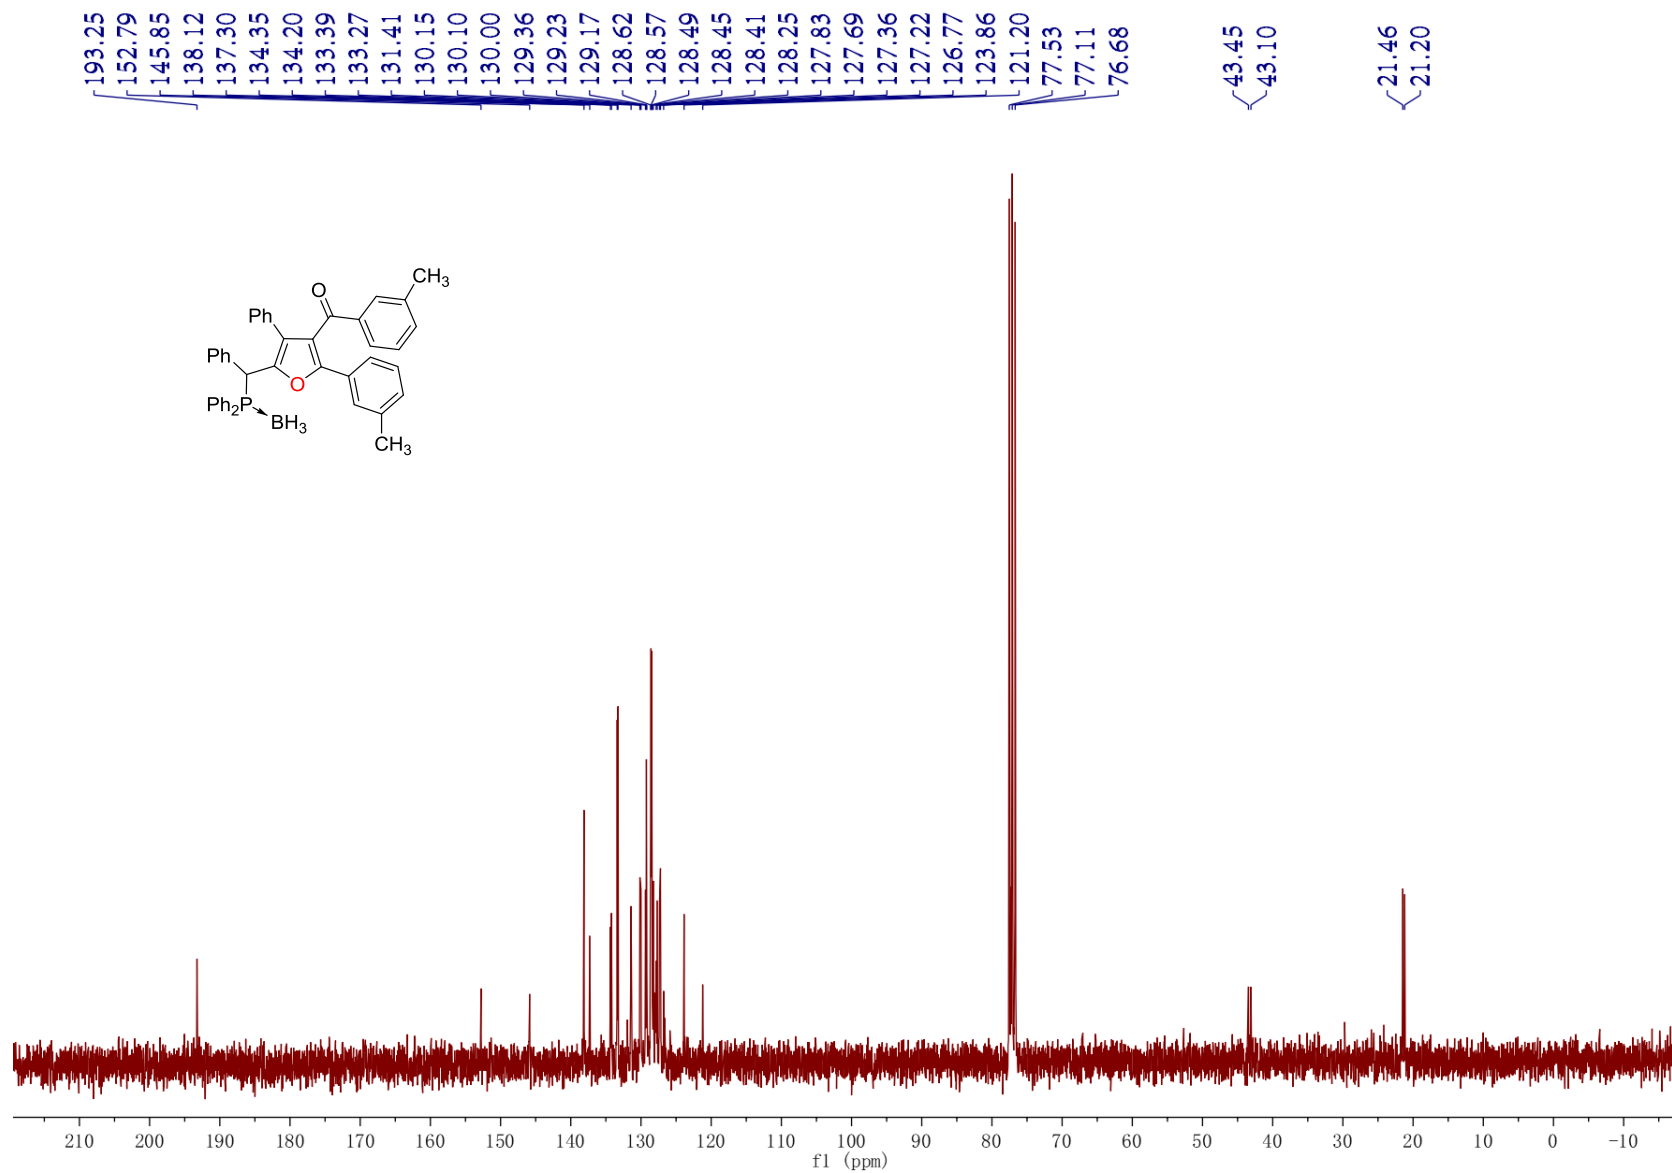

$^{13}\text{C}$   $\{^1\text{H}\}$  NMR (CDCl<sub>3</sub>, 75 MHz) of compound **3i**



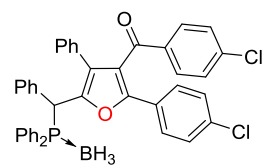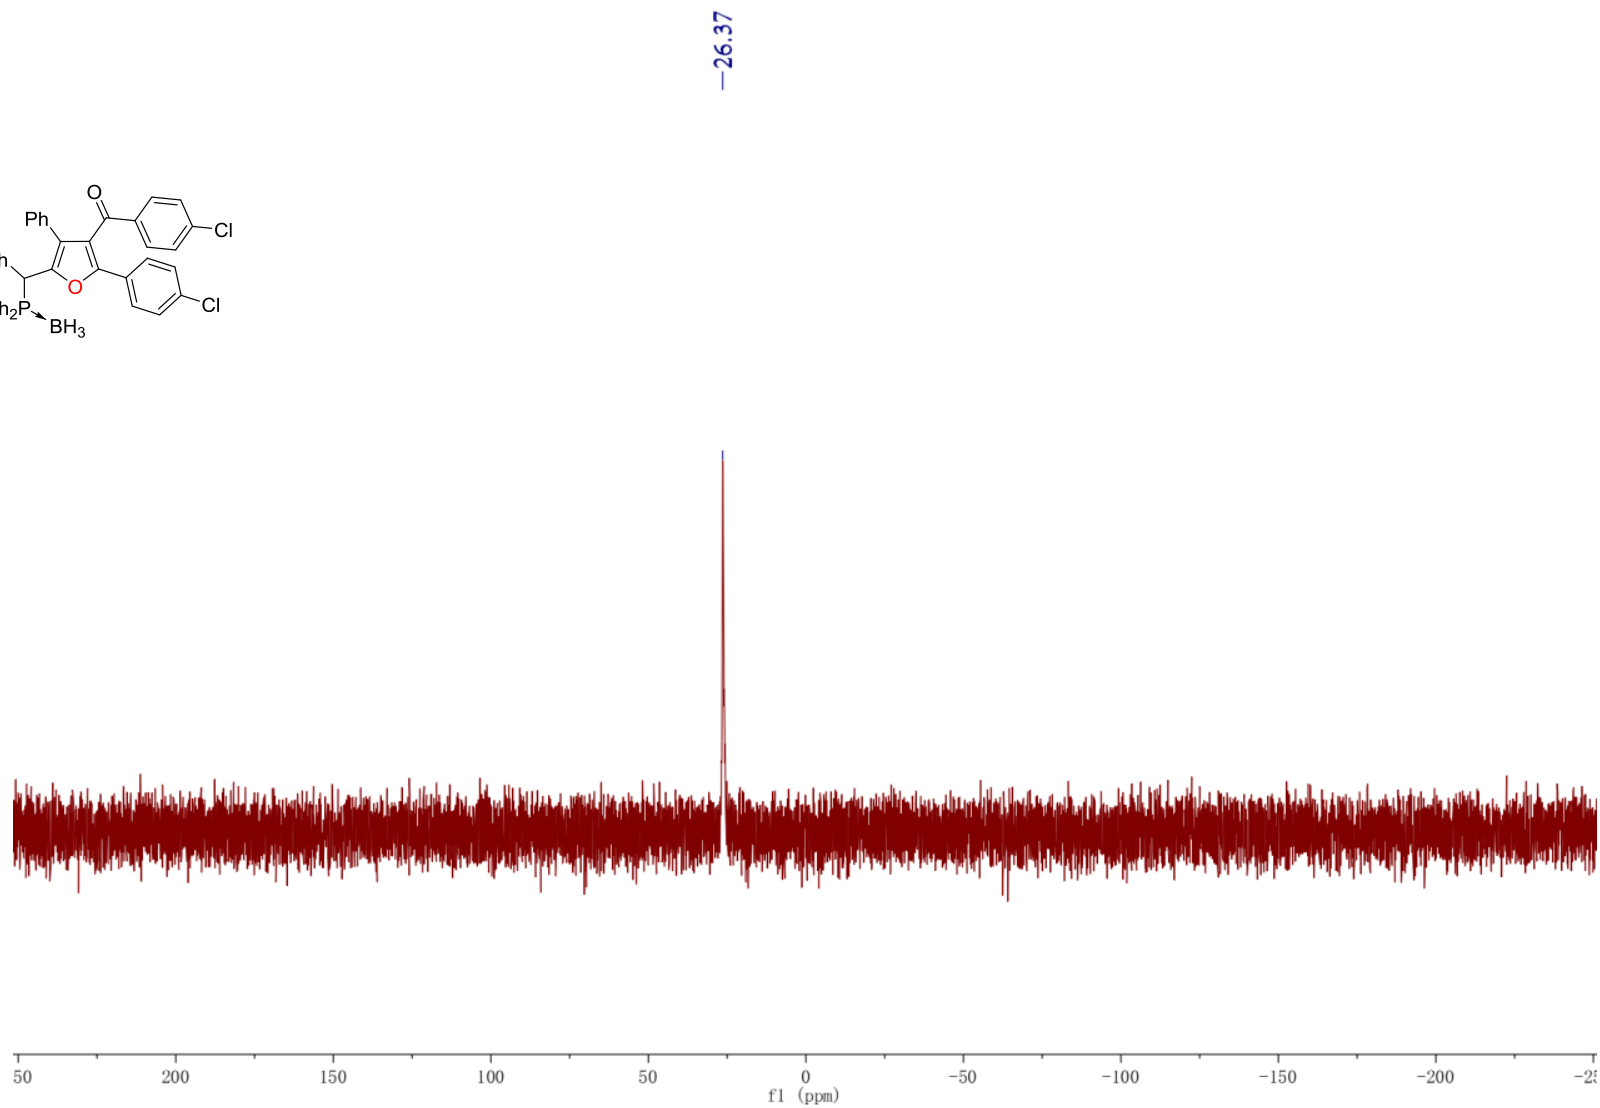

$^{31}\text{P}$  { $^1\text{H}$ } NMR ( $\text{CDCl}_3$ , 121 MHz) of compound **3j**

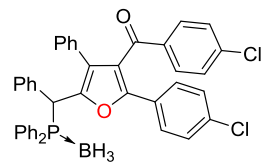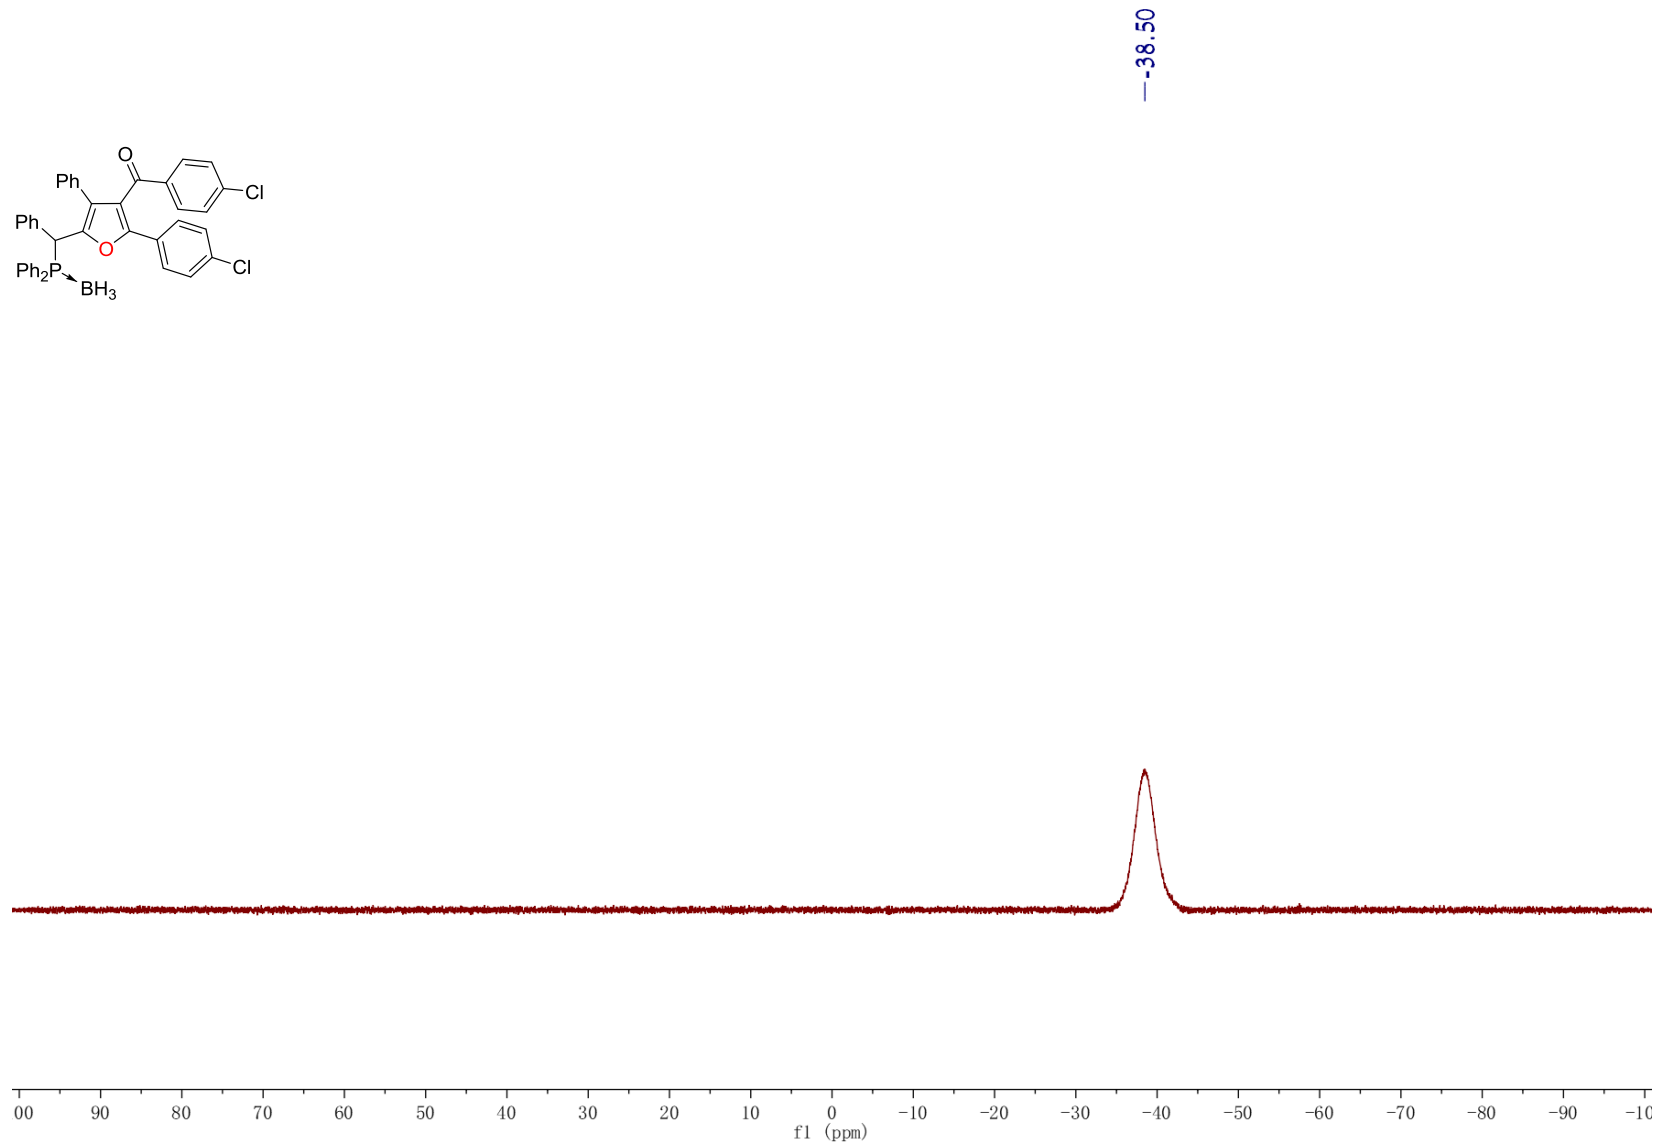

$^{11}\text{B}$  { $^1\text{H}$ } NMR ( $\text{CDCl}_3$ , 128 MHz) of compound **3j**

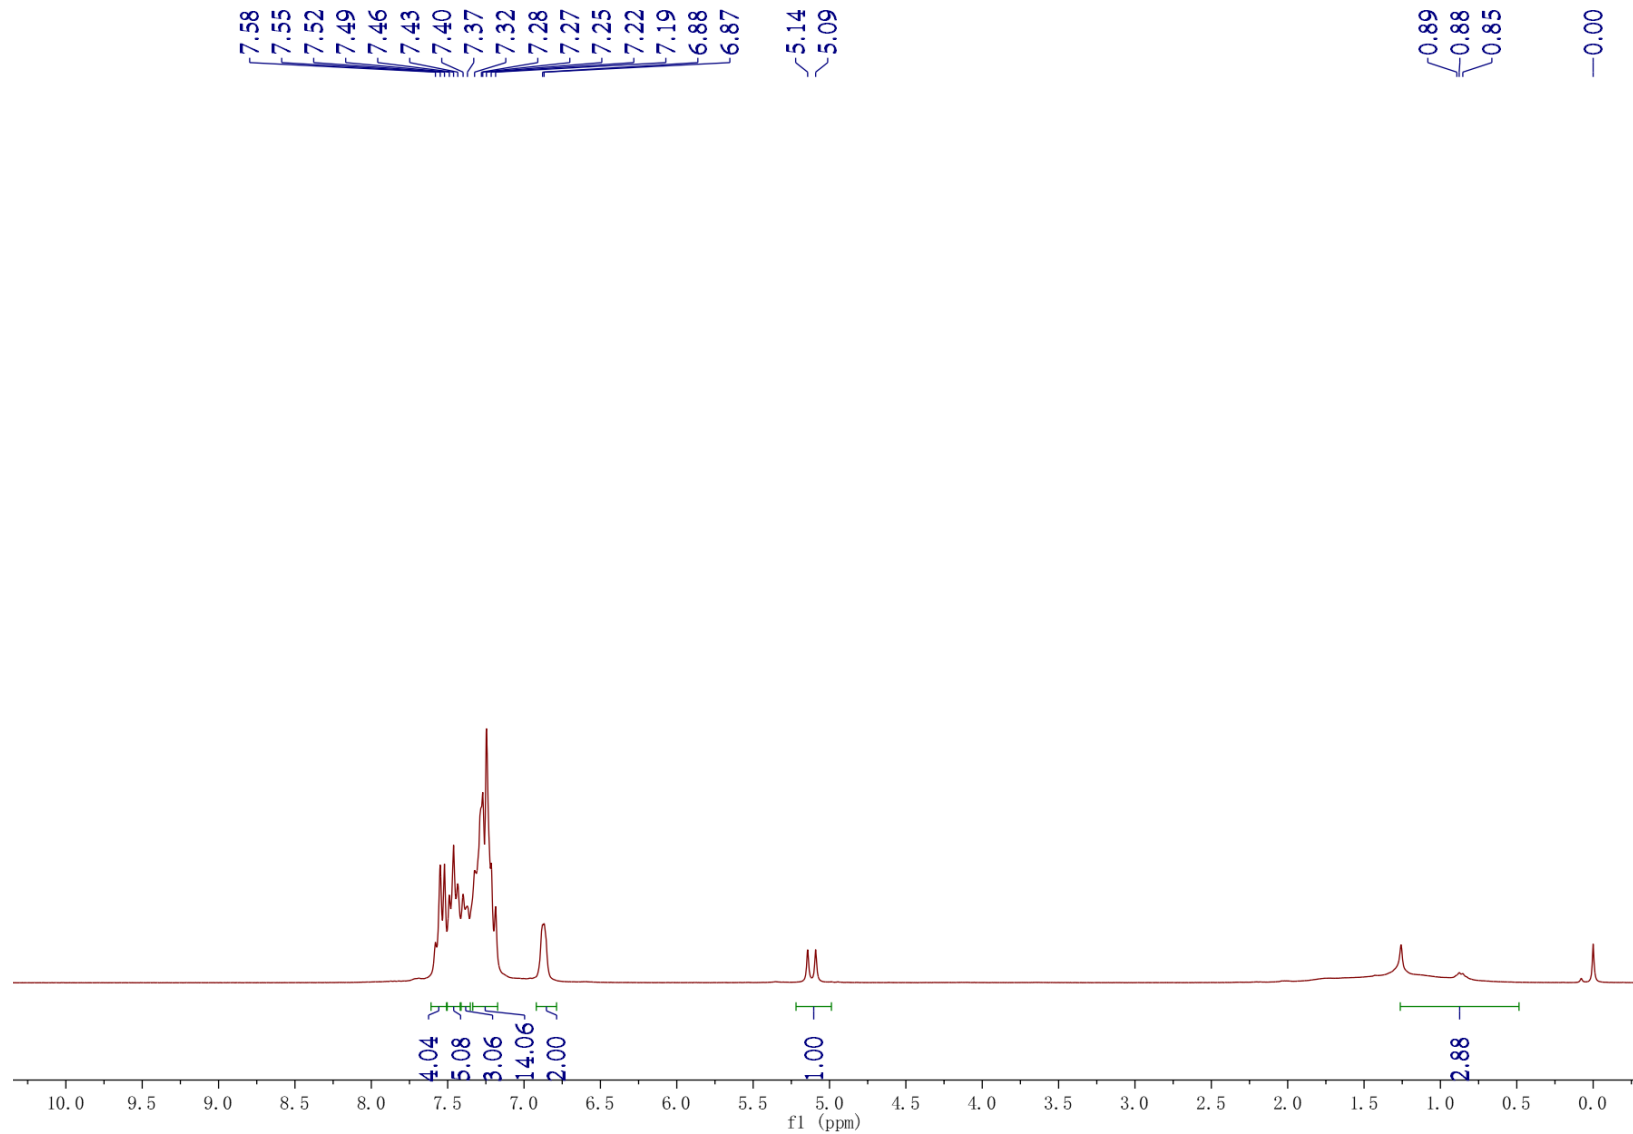

$^1\text{H}$  NMR ( $\text{CDCl}_3$ , 300 MHz) of compound **3j**

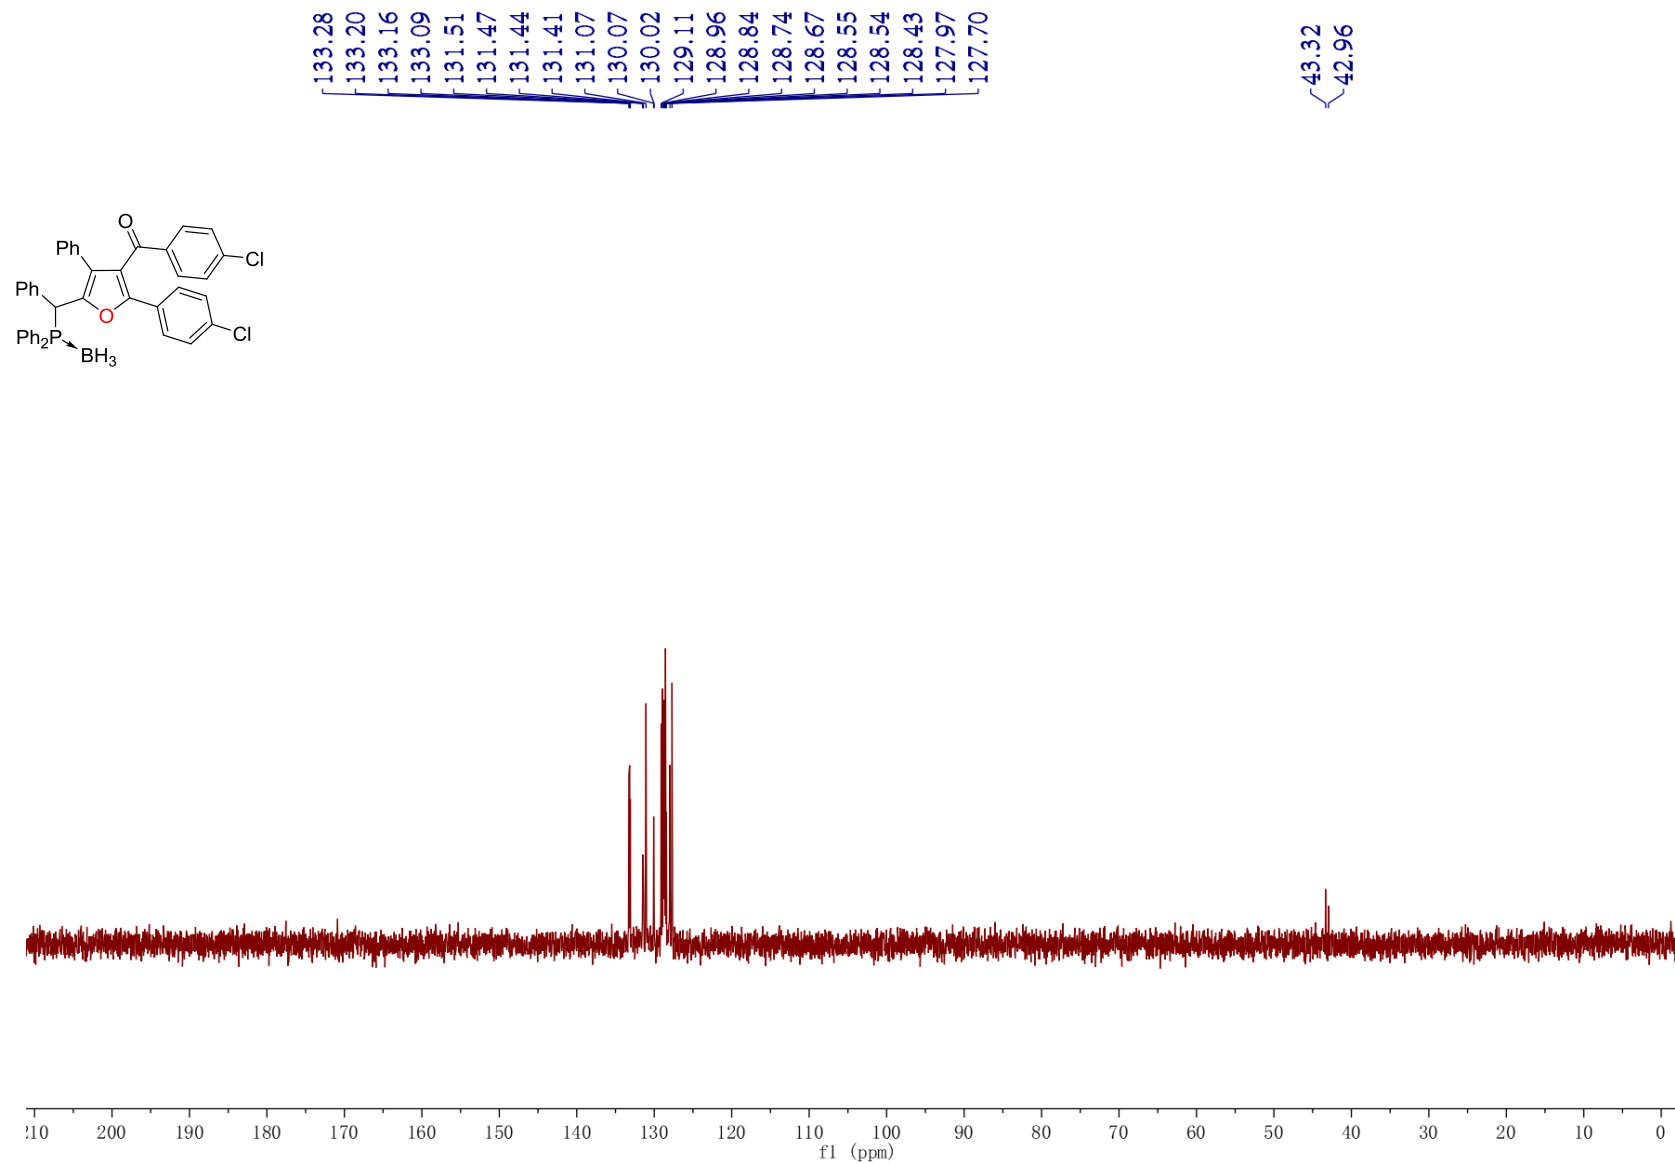

Dept 135 NMR (CDCl<sub>3</sub>, 75 MHz) of Compound 3j

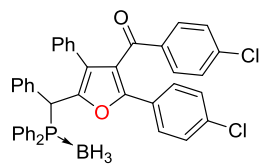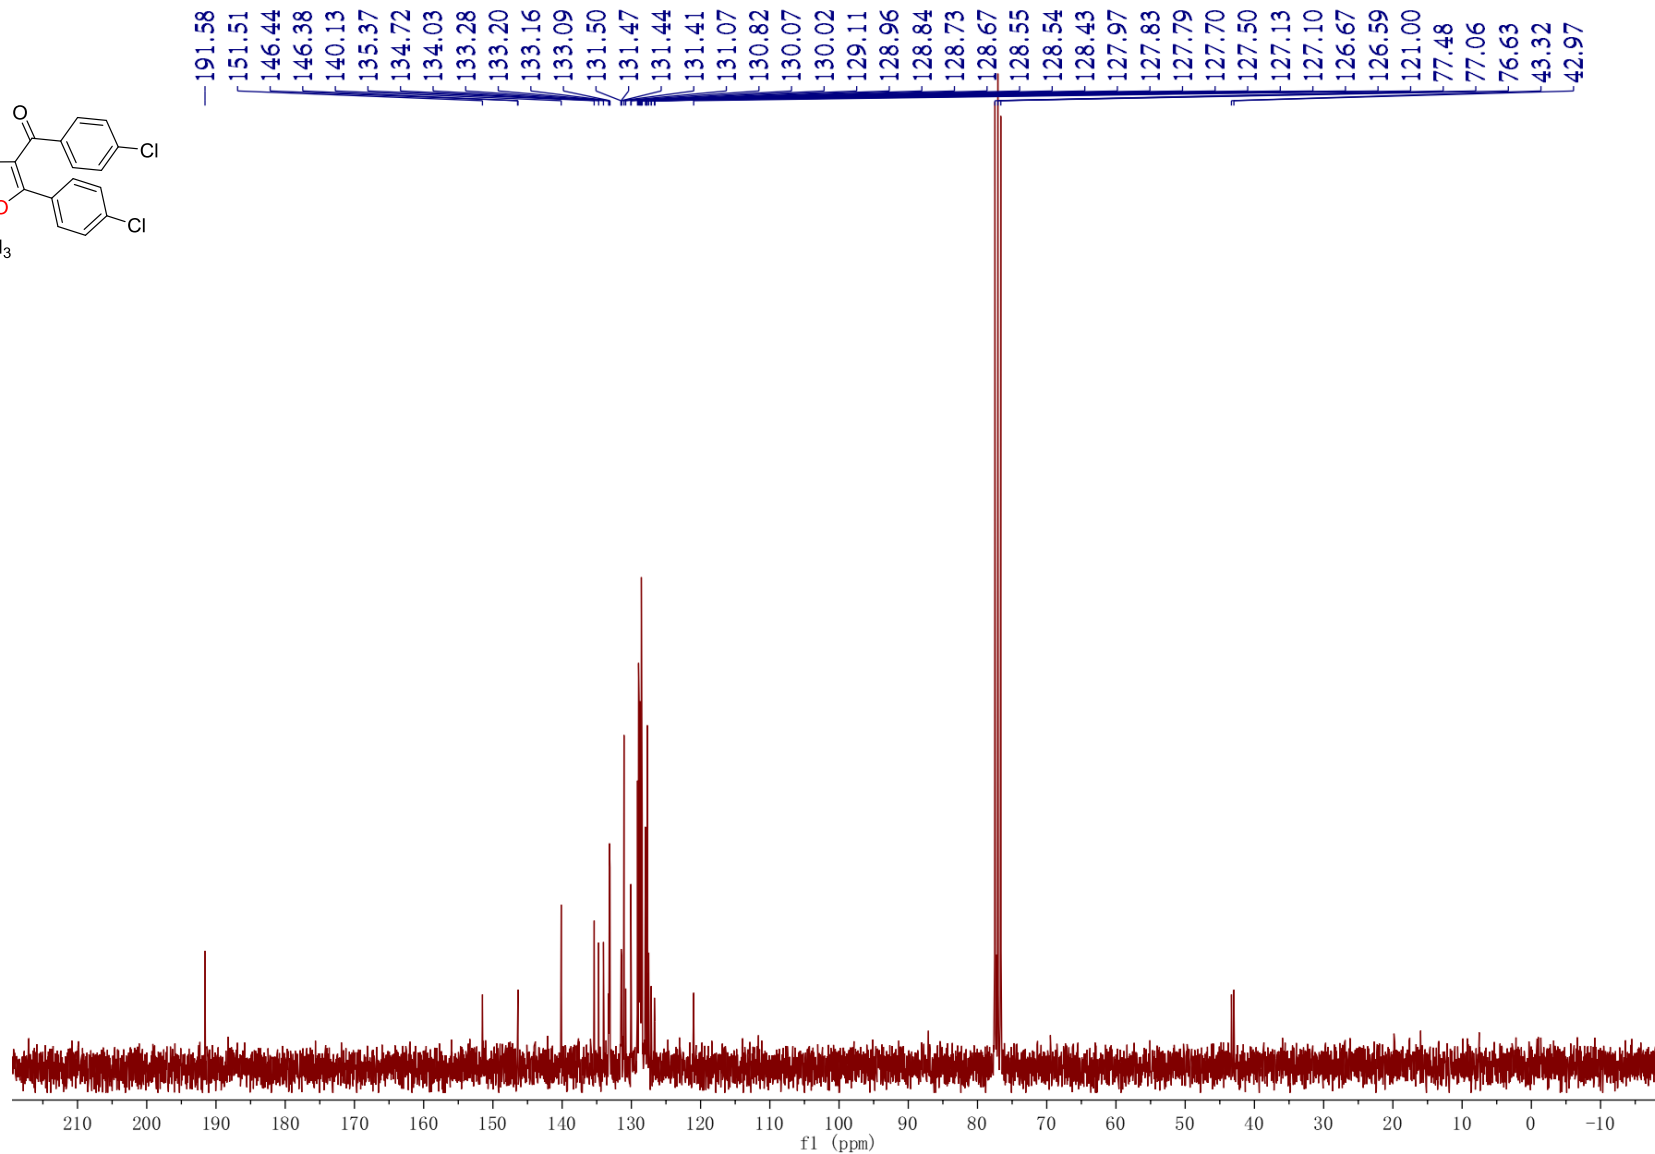

$^{13}\text{C} \{^1\text{H}\}$  NMR ( $\text{CDCl}_3$ , 75 MHz) of compound **3j**

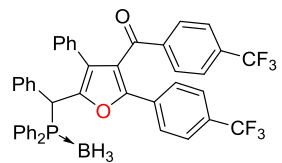

-27.72

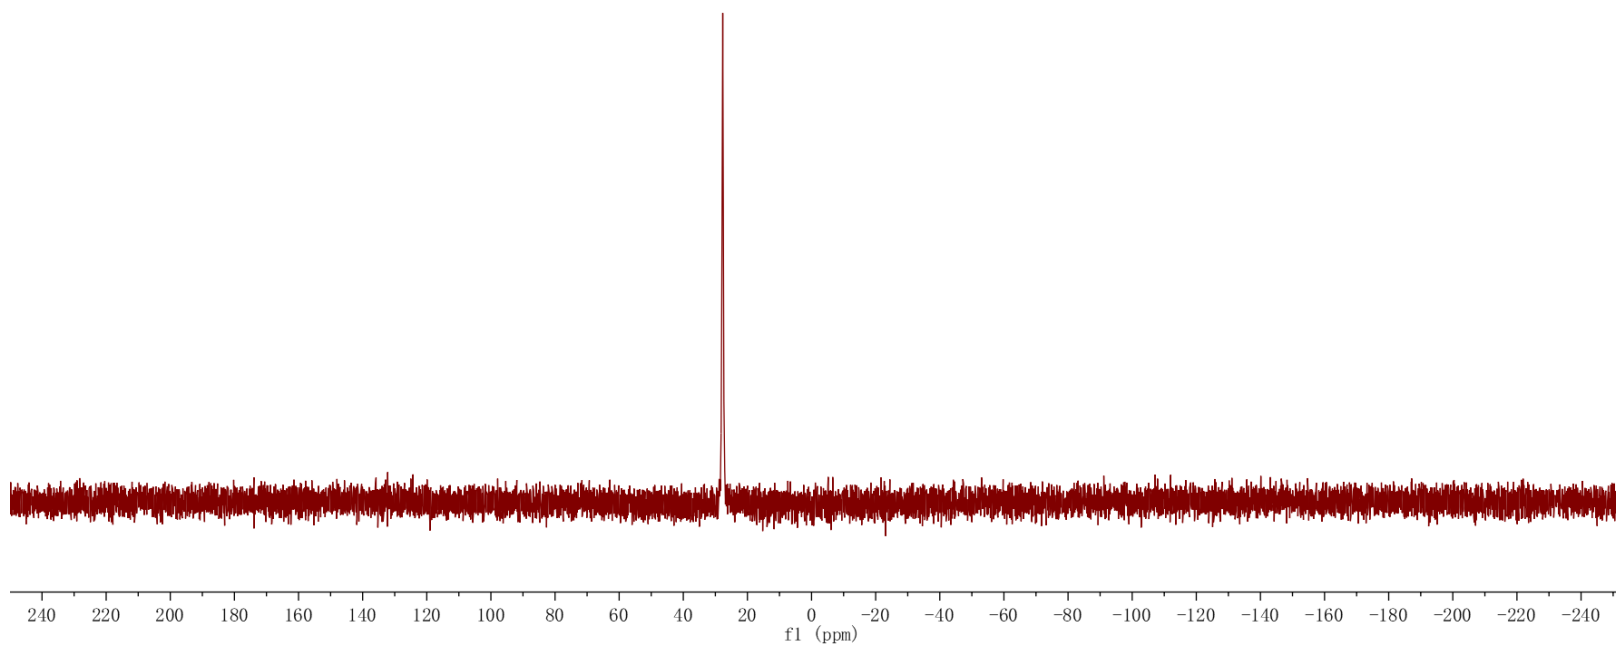

$^{31}\text{P}$  { $^1\text{H}$ } NMR ( $\text{CDCl}_3$ , 121 MHz) of compound **3k**

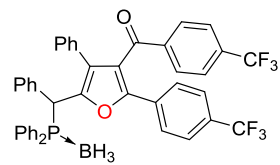

--38.12

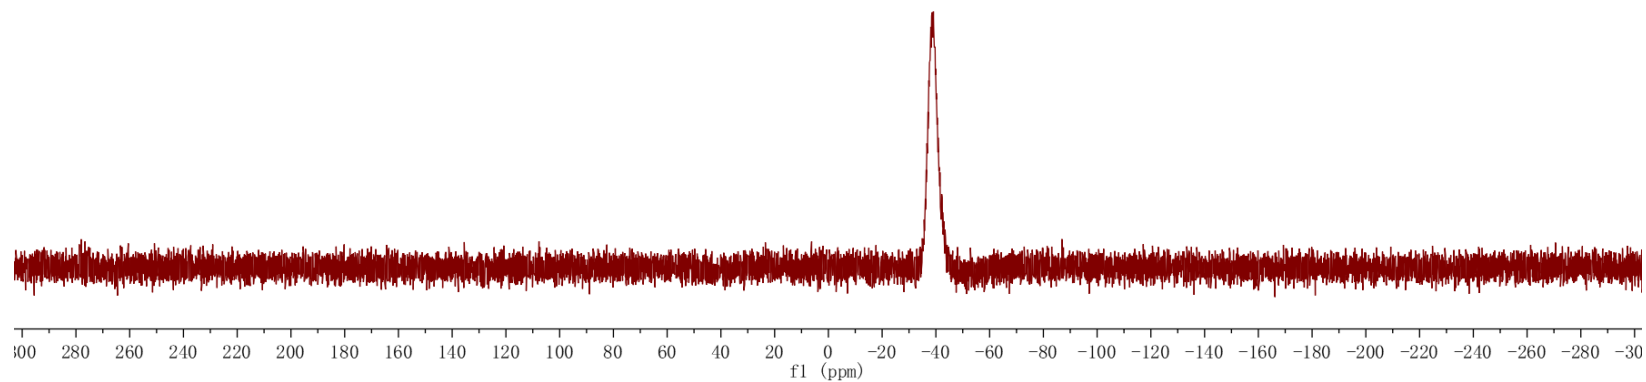

$^{11}\text{B}$   $\{^1\text{H}\}$  NMR ( $\text{CDCl}_3$ , 128 MHz) of compound **3k**

Desktop  
F19

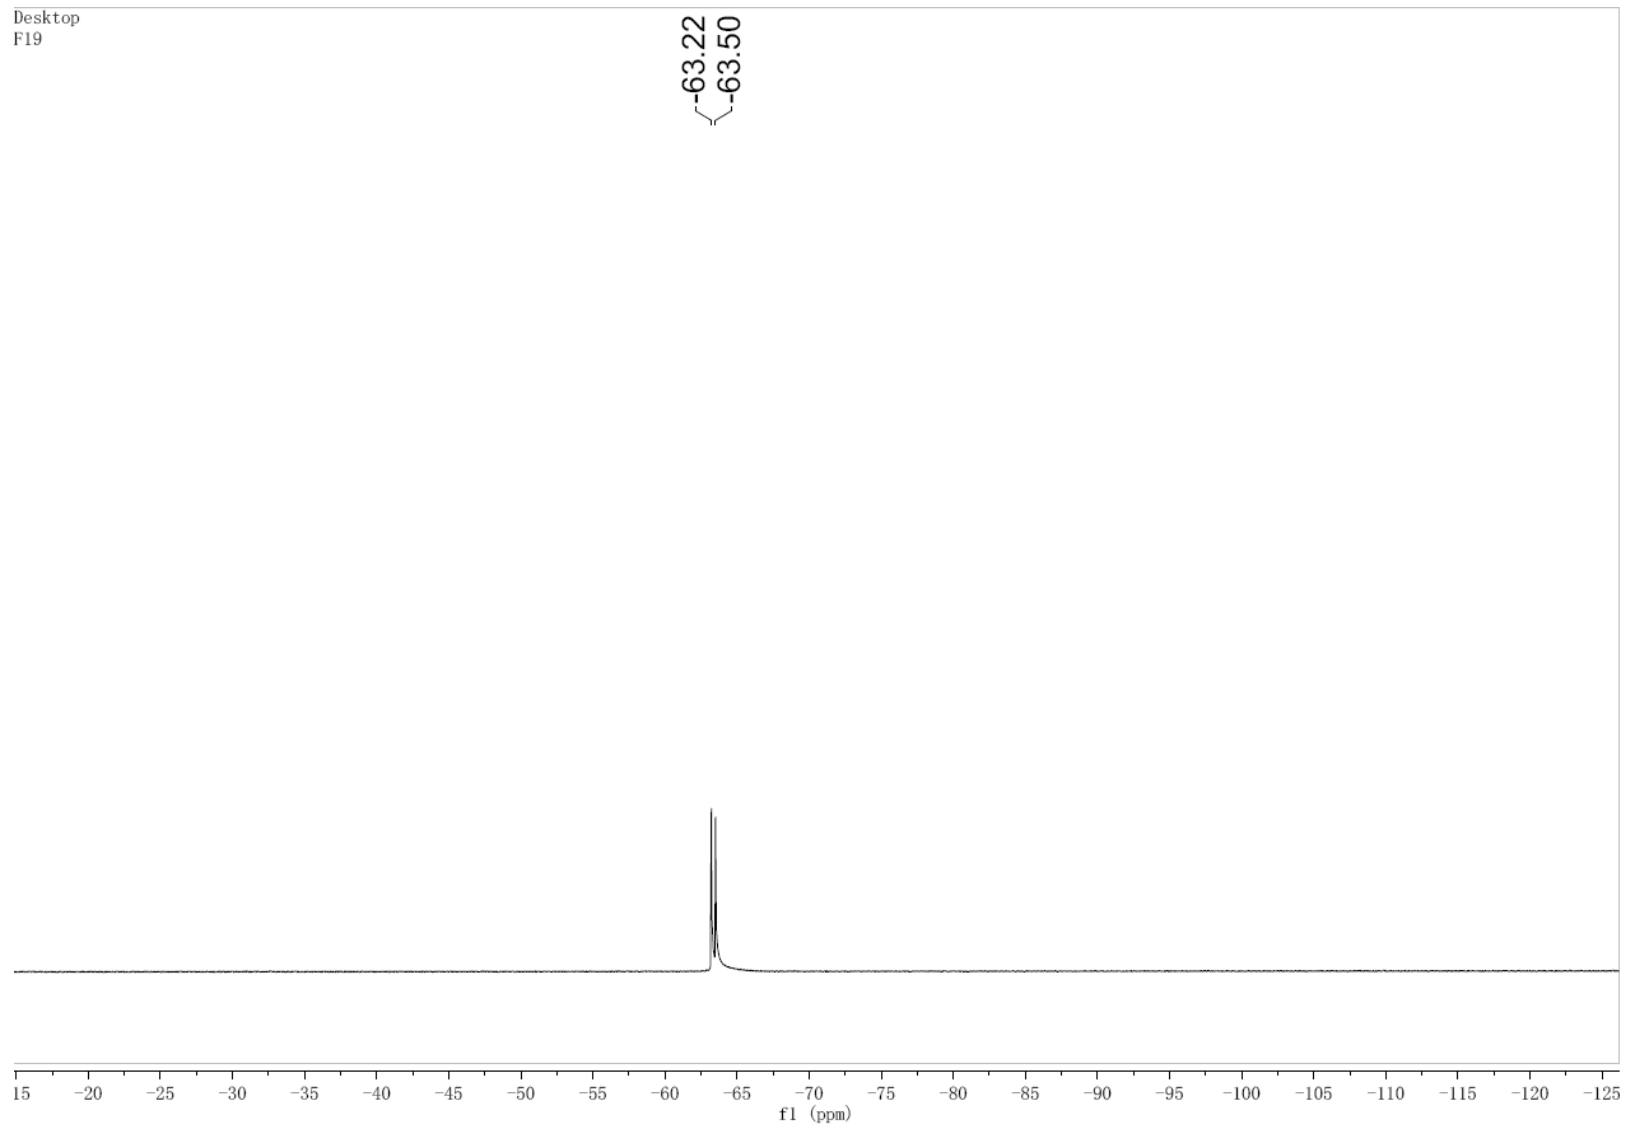

$^{19}\text{F}$  NMR ( $\text{CDCl}_3$ , 282 MHz) of compound **3k**



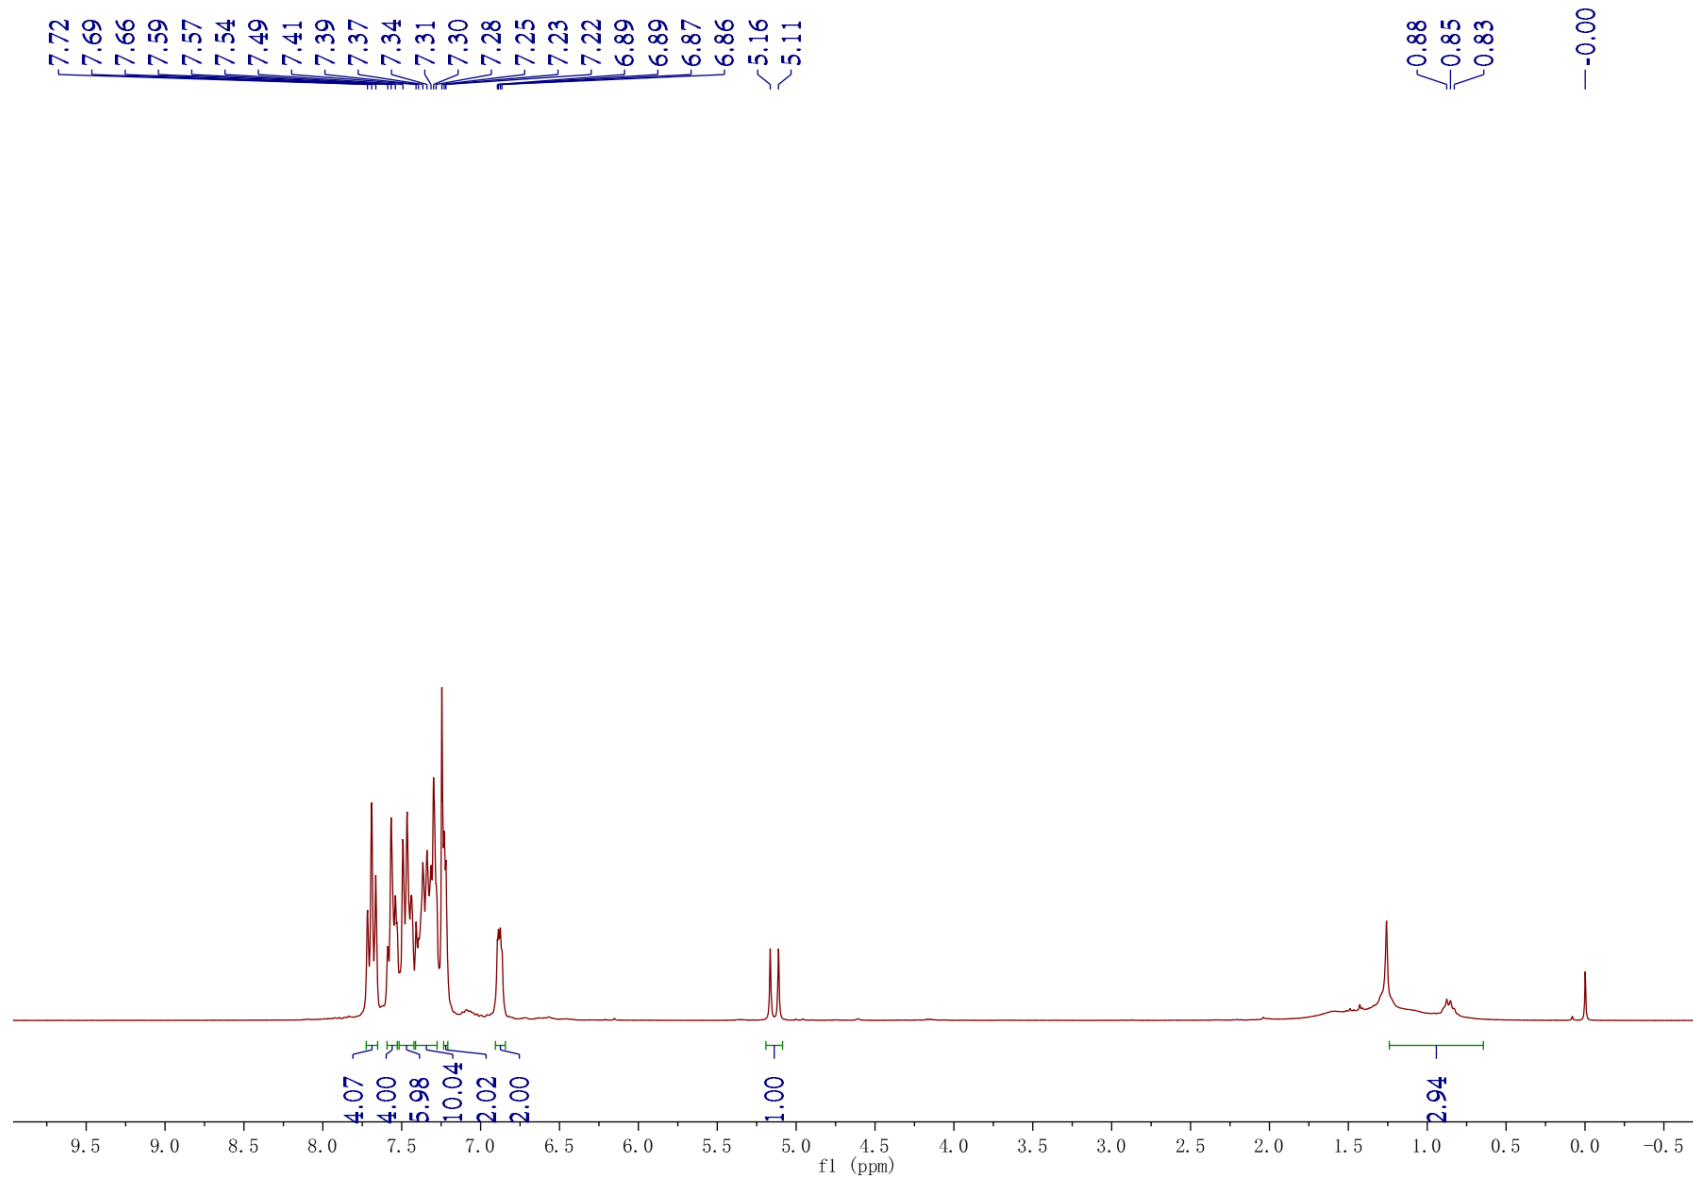

$^1\text{H}$  NMR ( $\text{CDCl}_3$ , 300 MHz) of compound **3k**

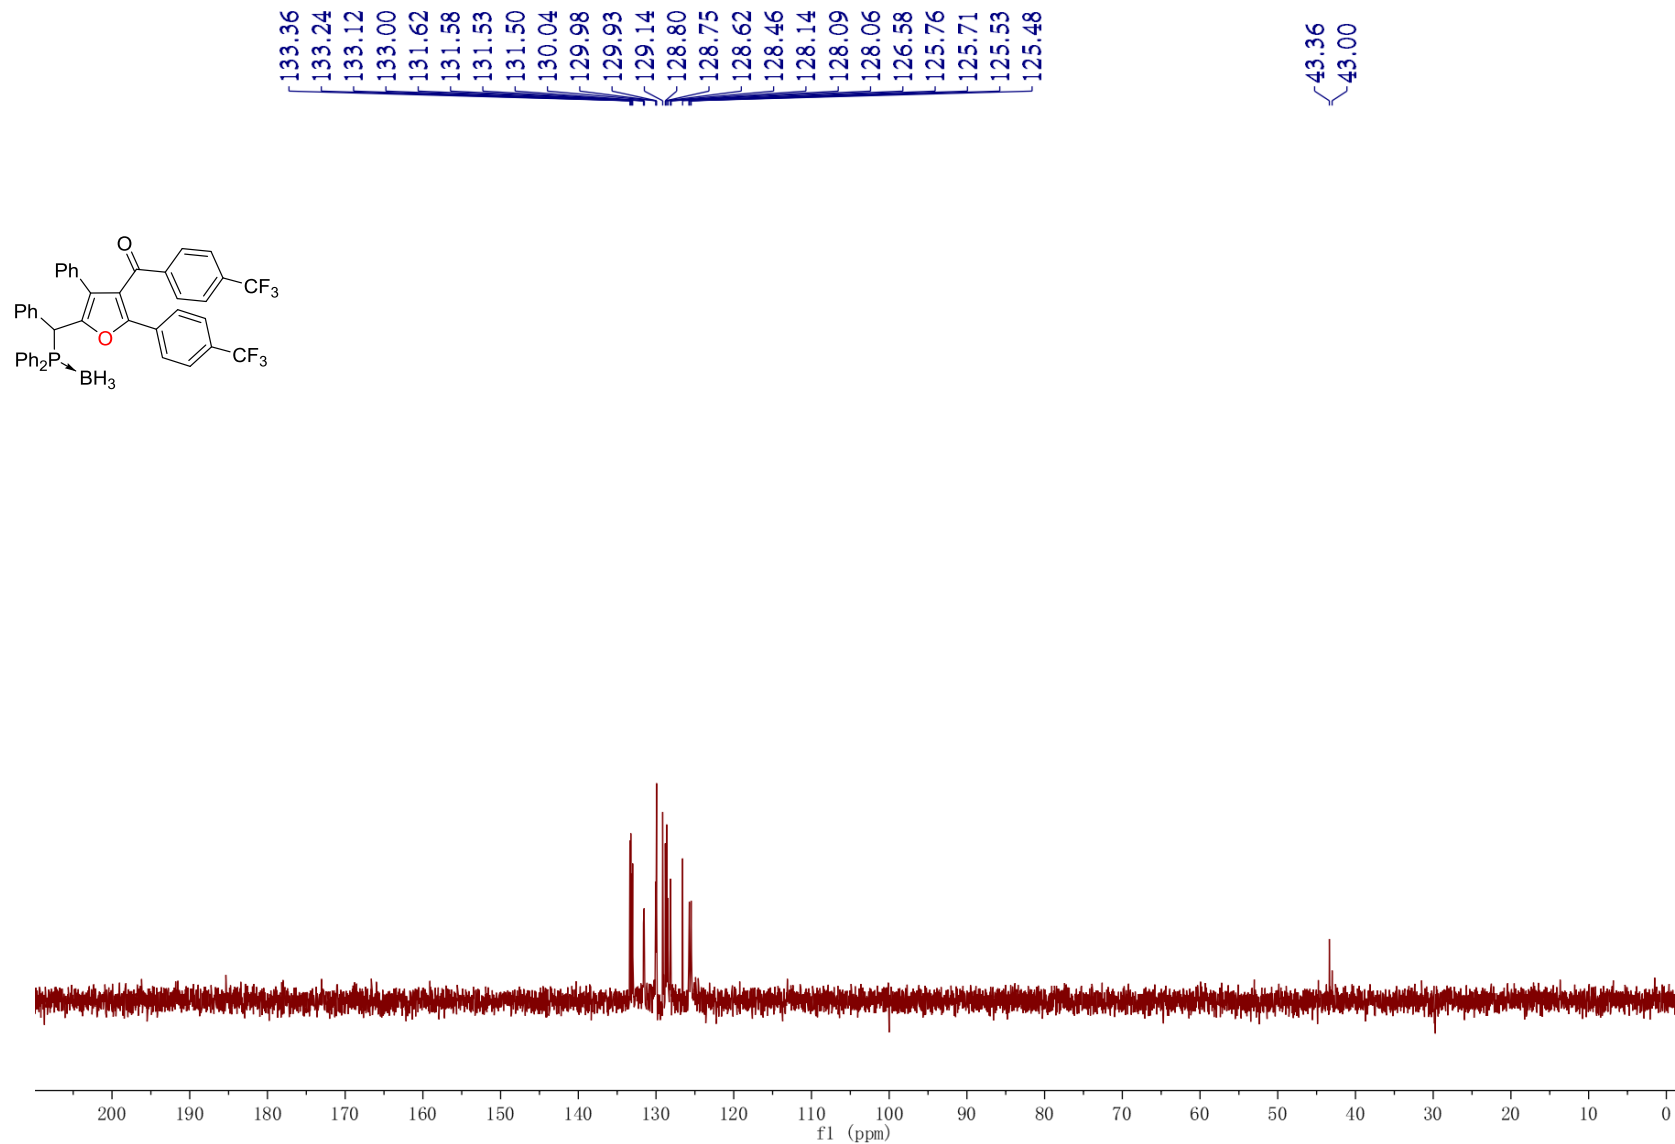

Dept 135 NMR (CDCl<sub>3</sub>, 101 MHz) of Compound **3k**

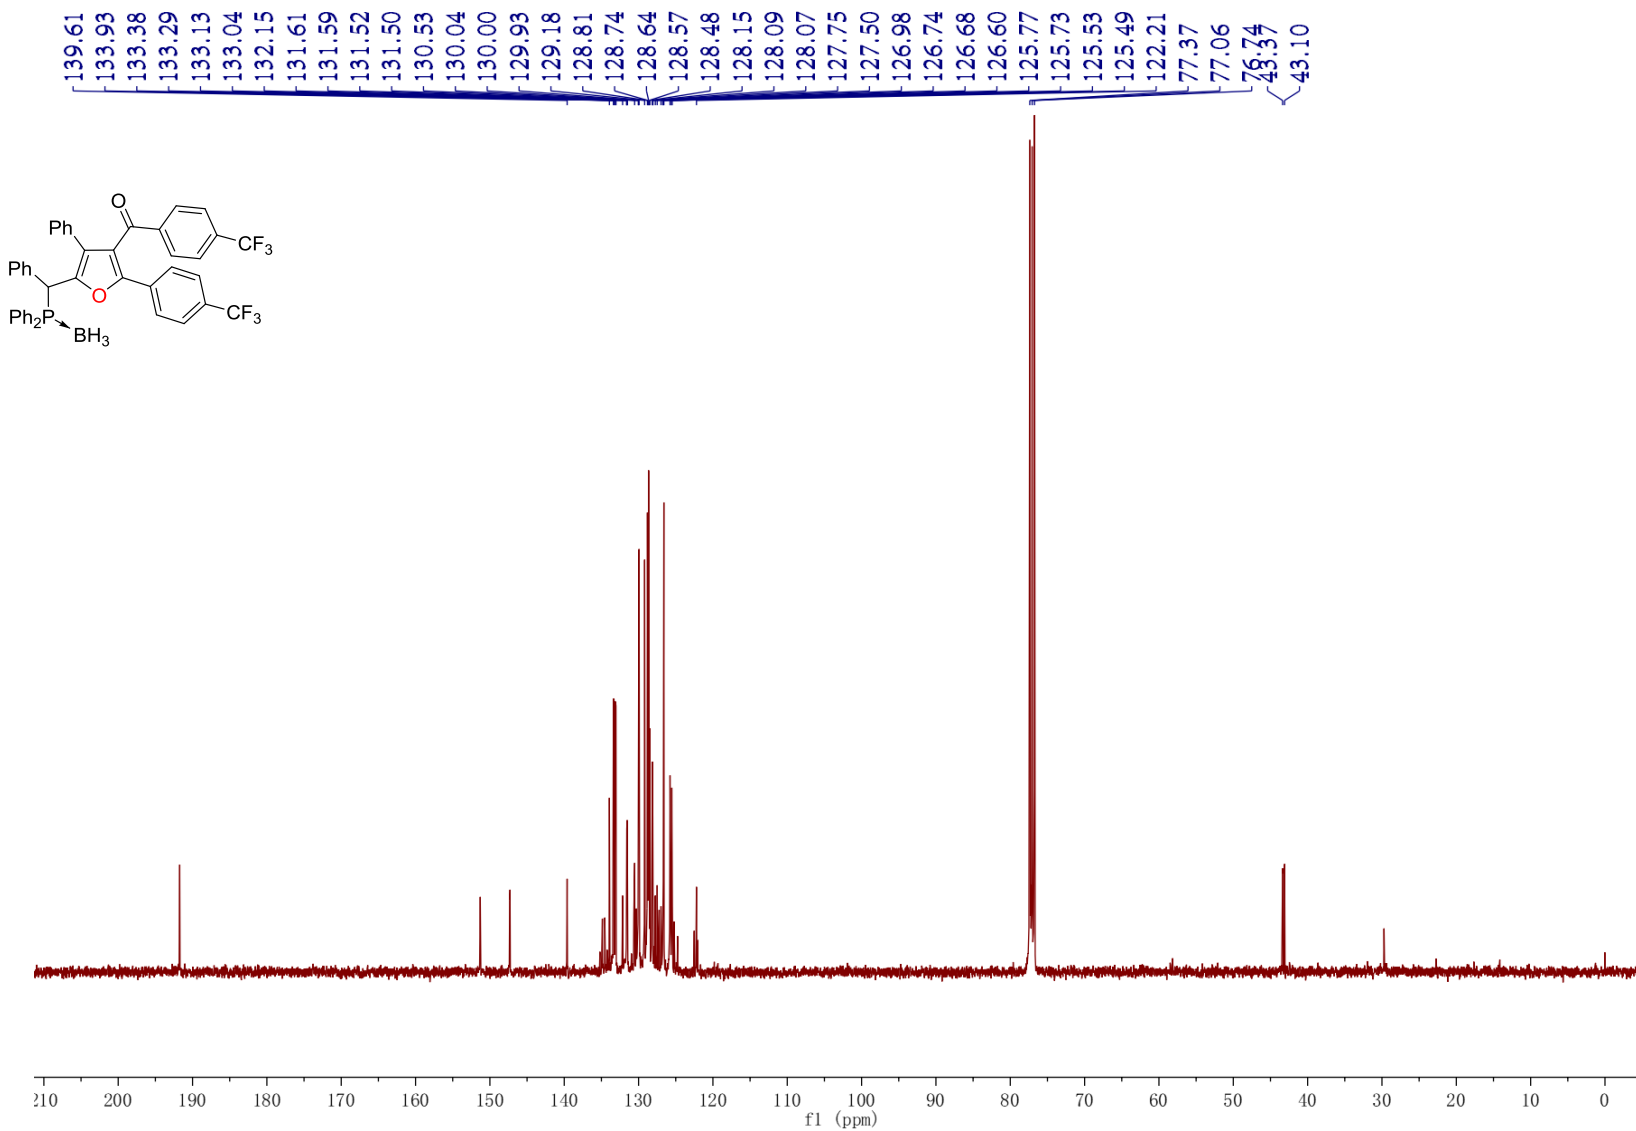

<sup>13</sup>C {<sup>1</sup>H} NMR (CDCl<sub>3</sub>, 101 MHz) of compound **3k**

-27.12

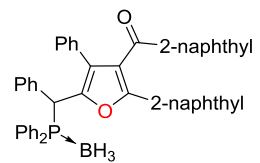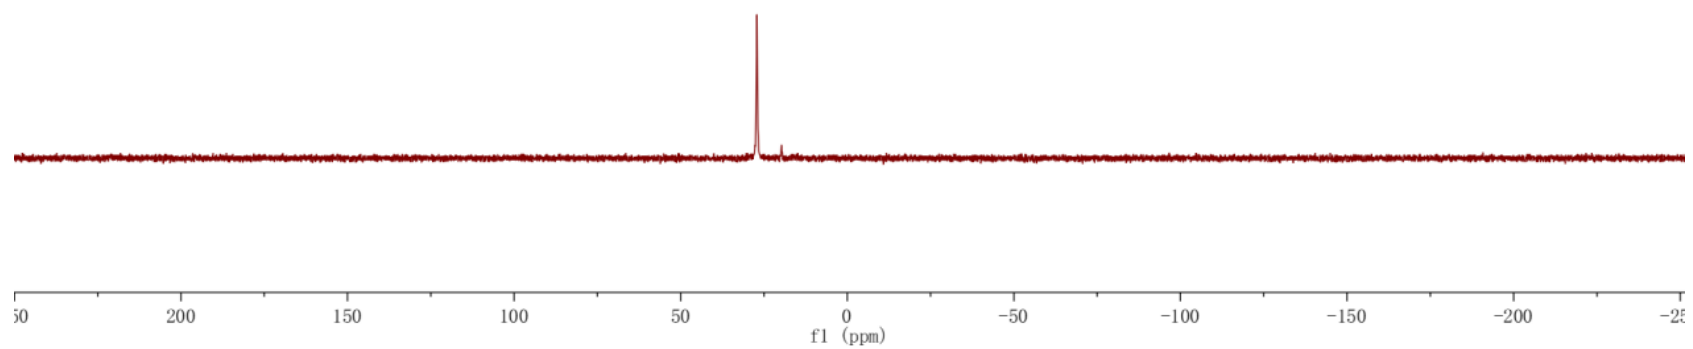

<sup>31</sup>P {<sup>1</sup>H} NMR (CDCl<sub>3</sub>, 121 MHz) of compound **31**

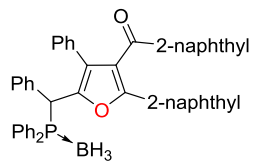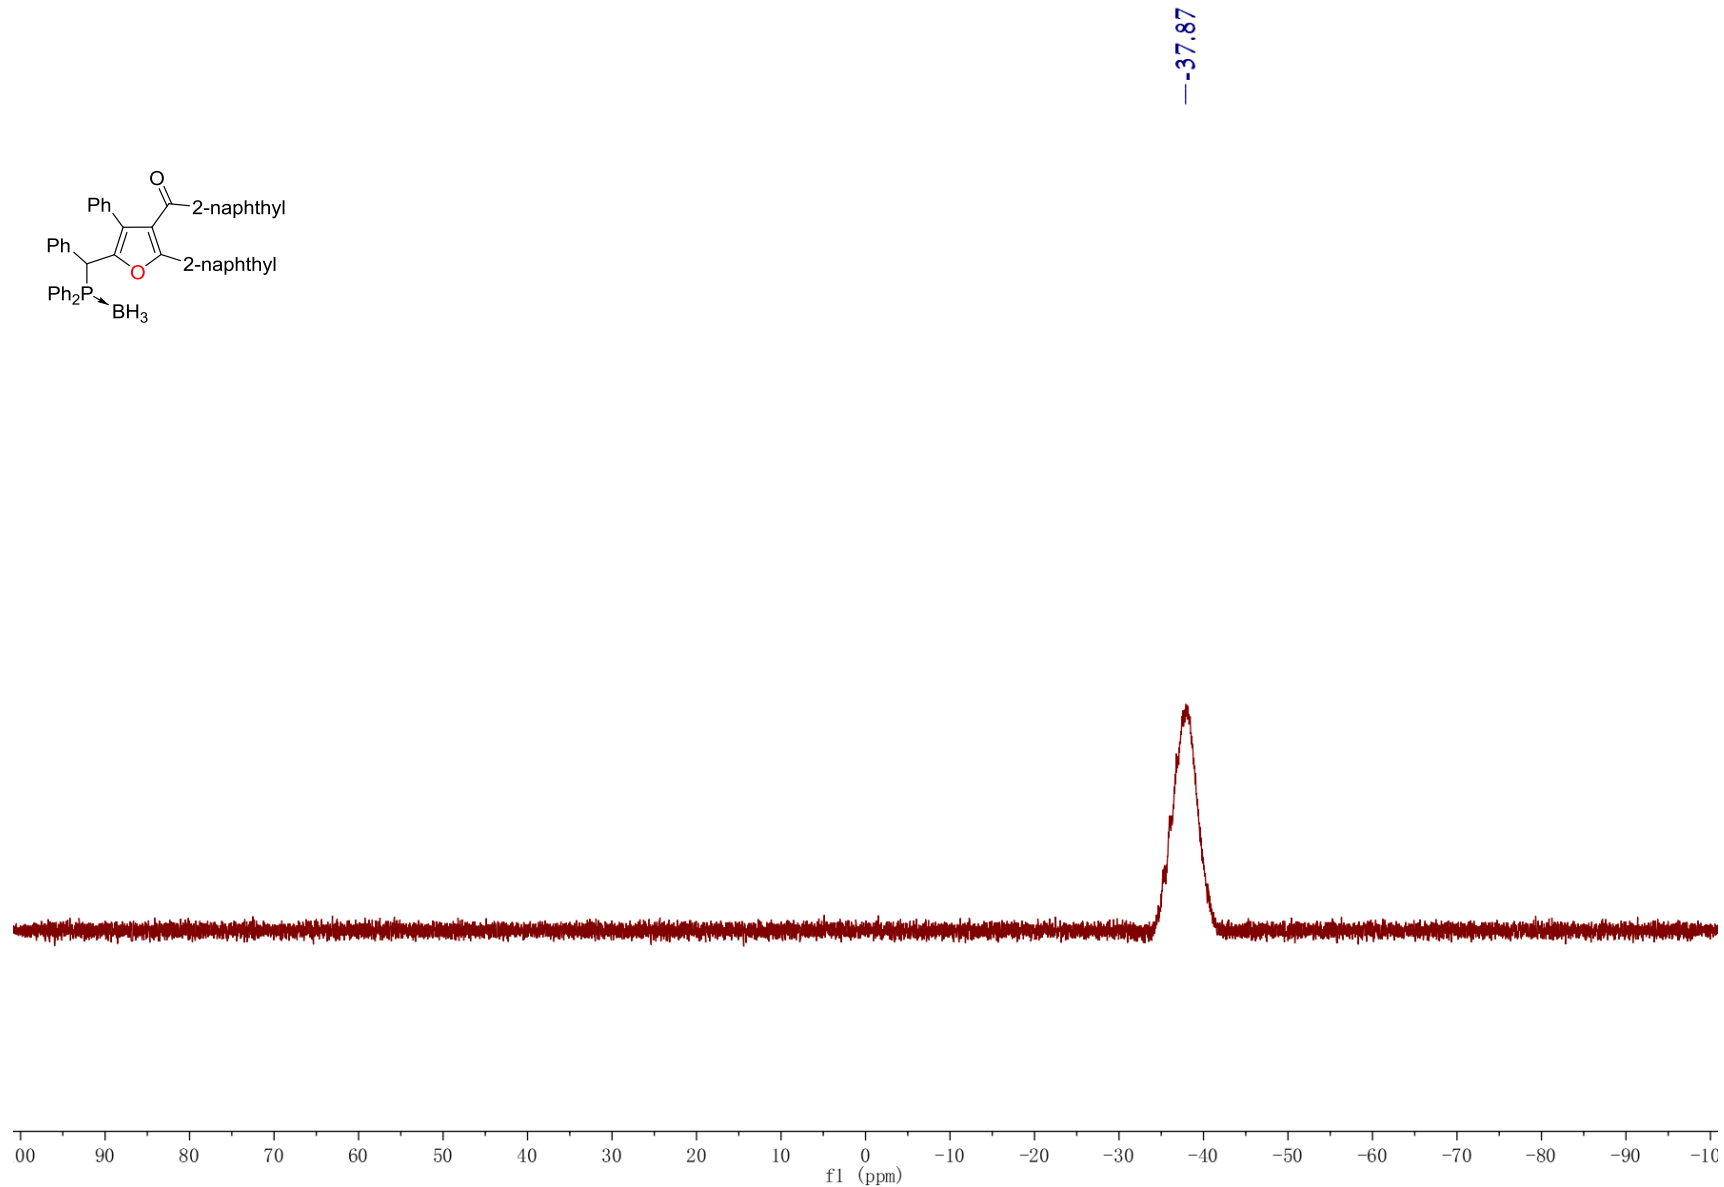

<sup>11</sup>B {<sup>1</sup>H} NMR (CDCl<sub>3</sub>, 128 MHz) of compound **31**

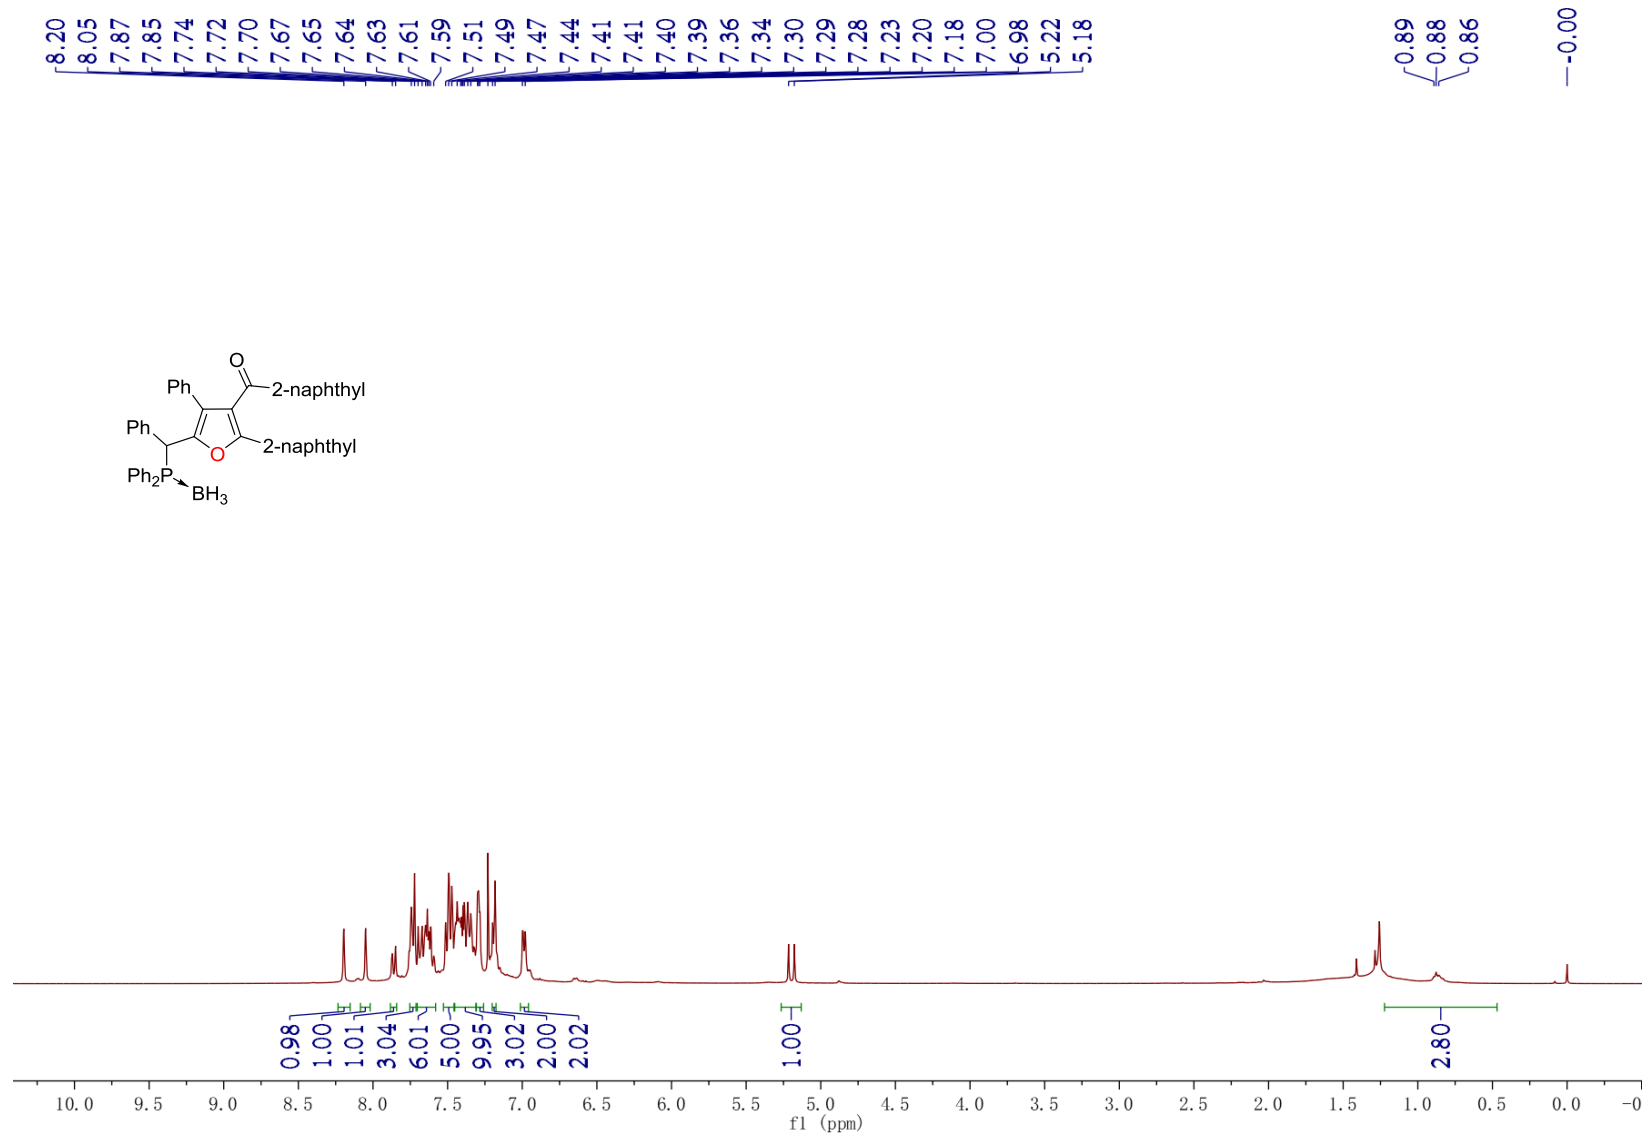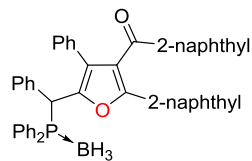

<sup>1</sup>H NMR (CDCl<sub>3</sub>, 400 MHz) of compound **31**

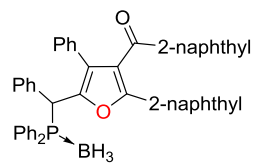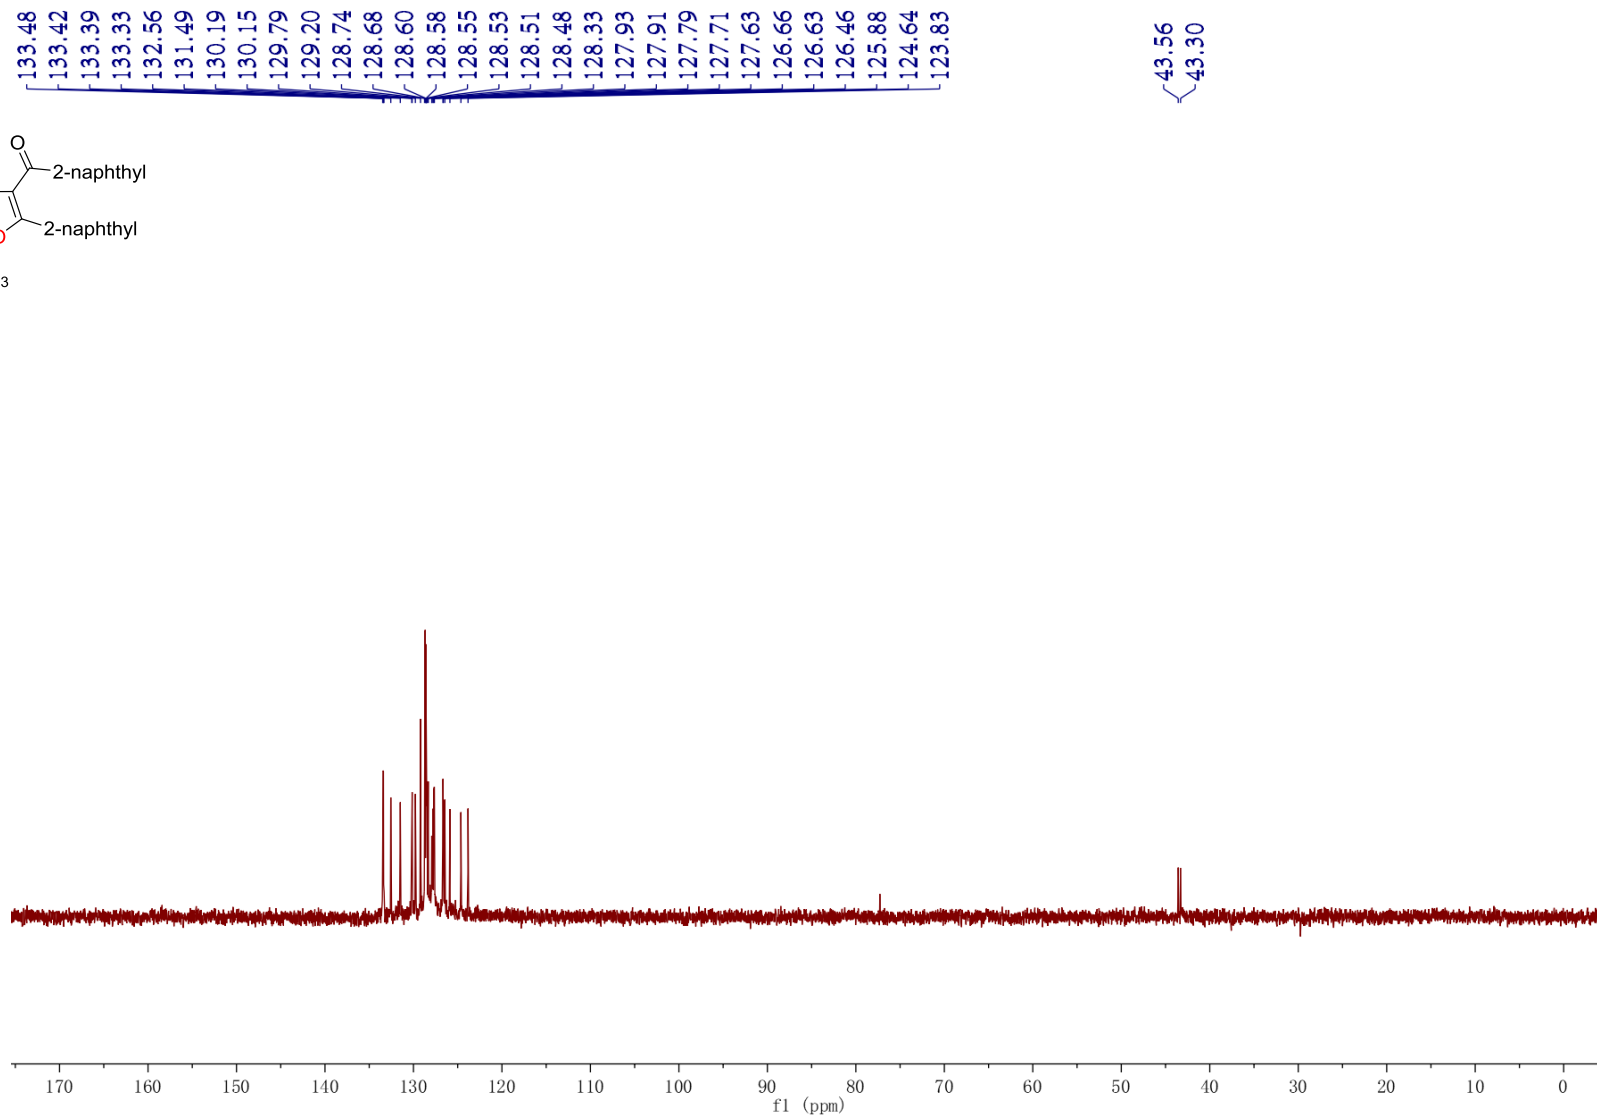

Dept 135 NMR (CDCl<sub>3</sub>, 101 MHz) of Compound **31**

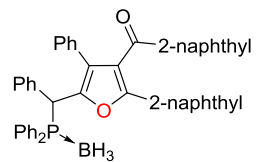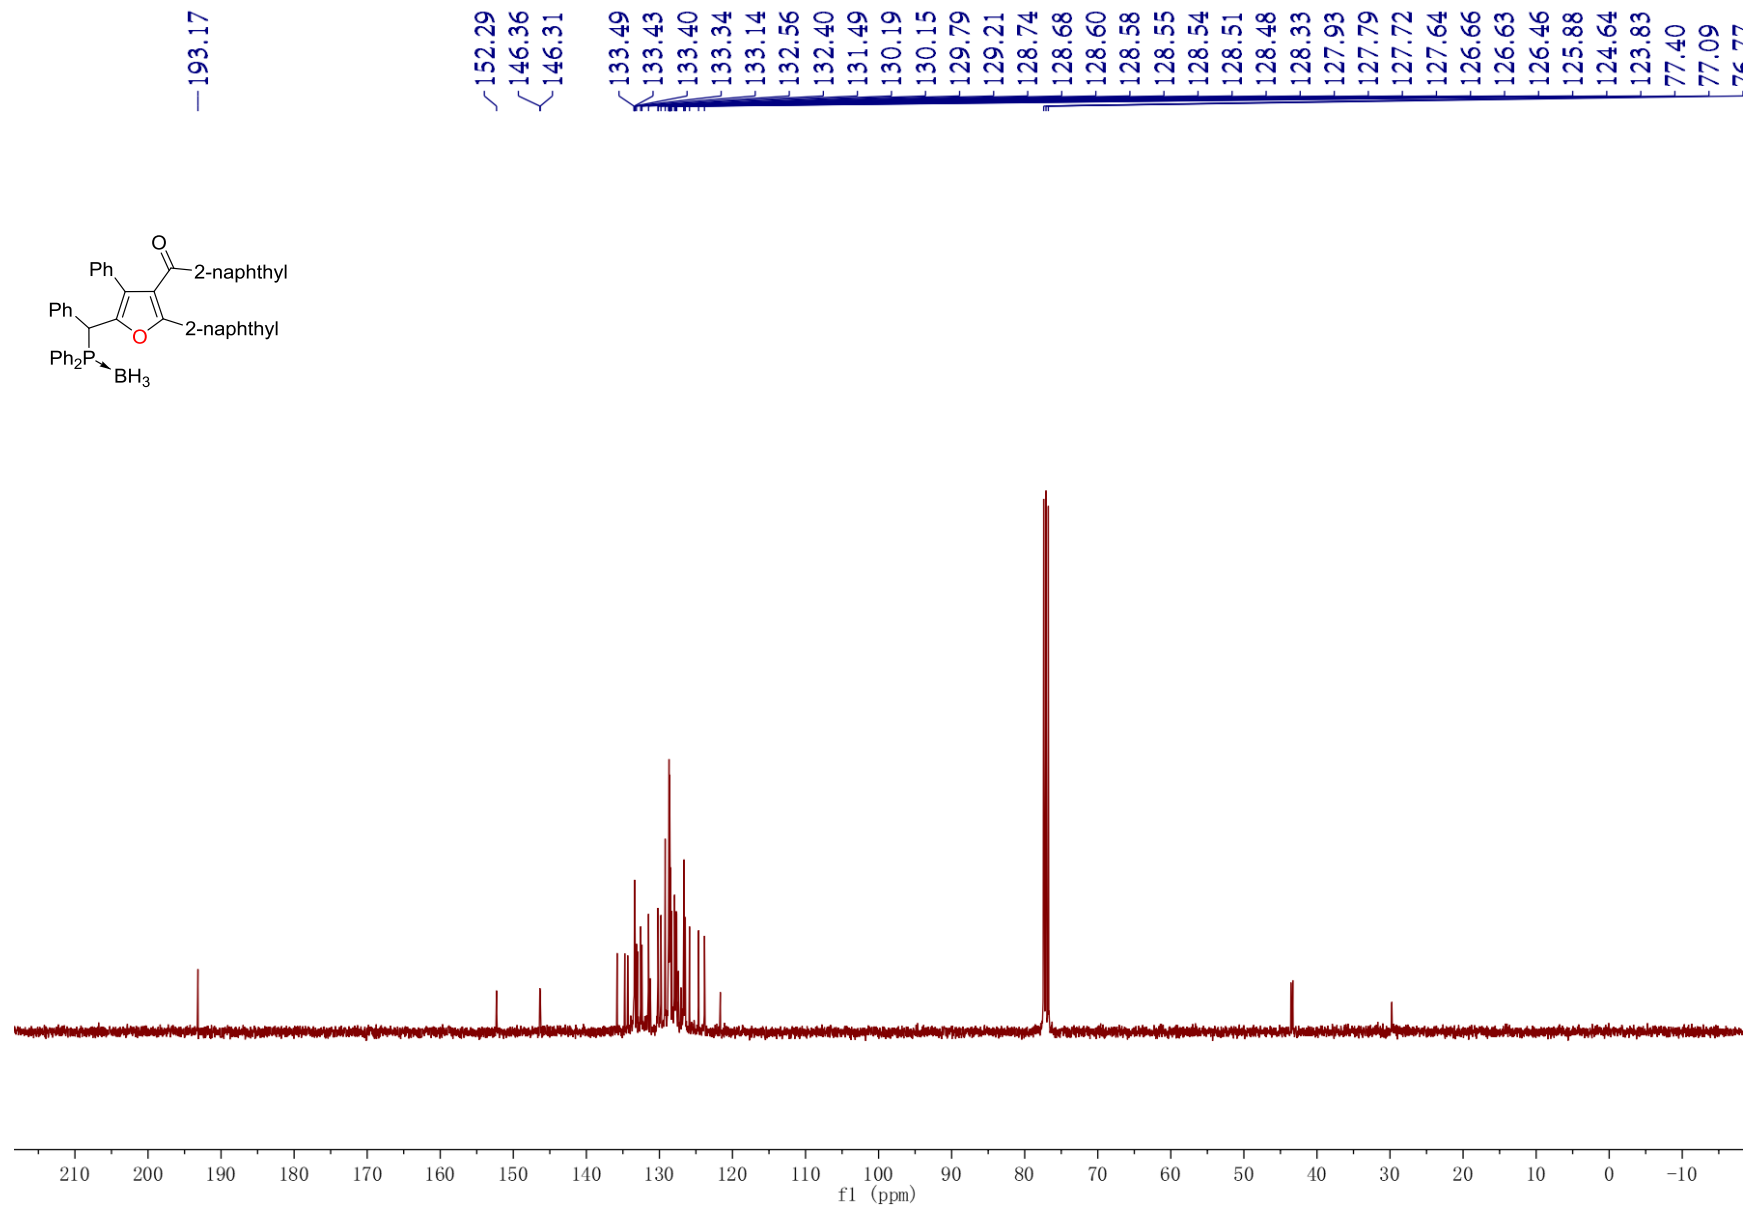

<sup>13</sup>C {<sup>1</sup>H} NMR (CDCl<sub>3</sub>, 101 MHz) of compound **31**





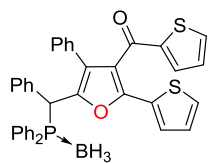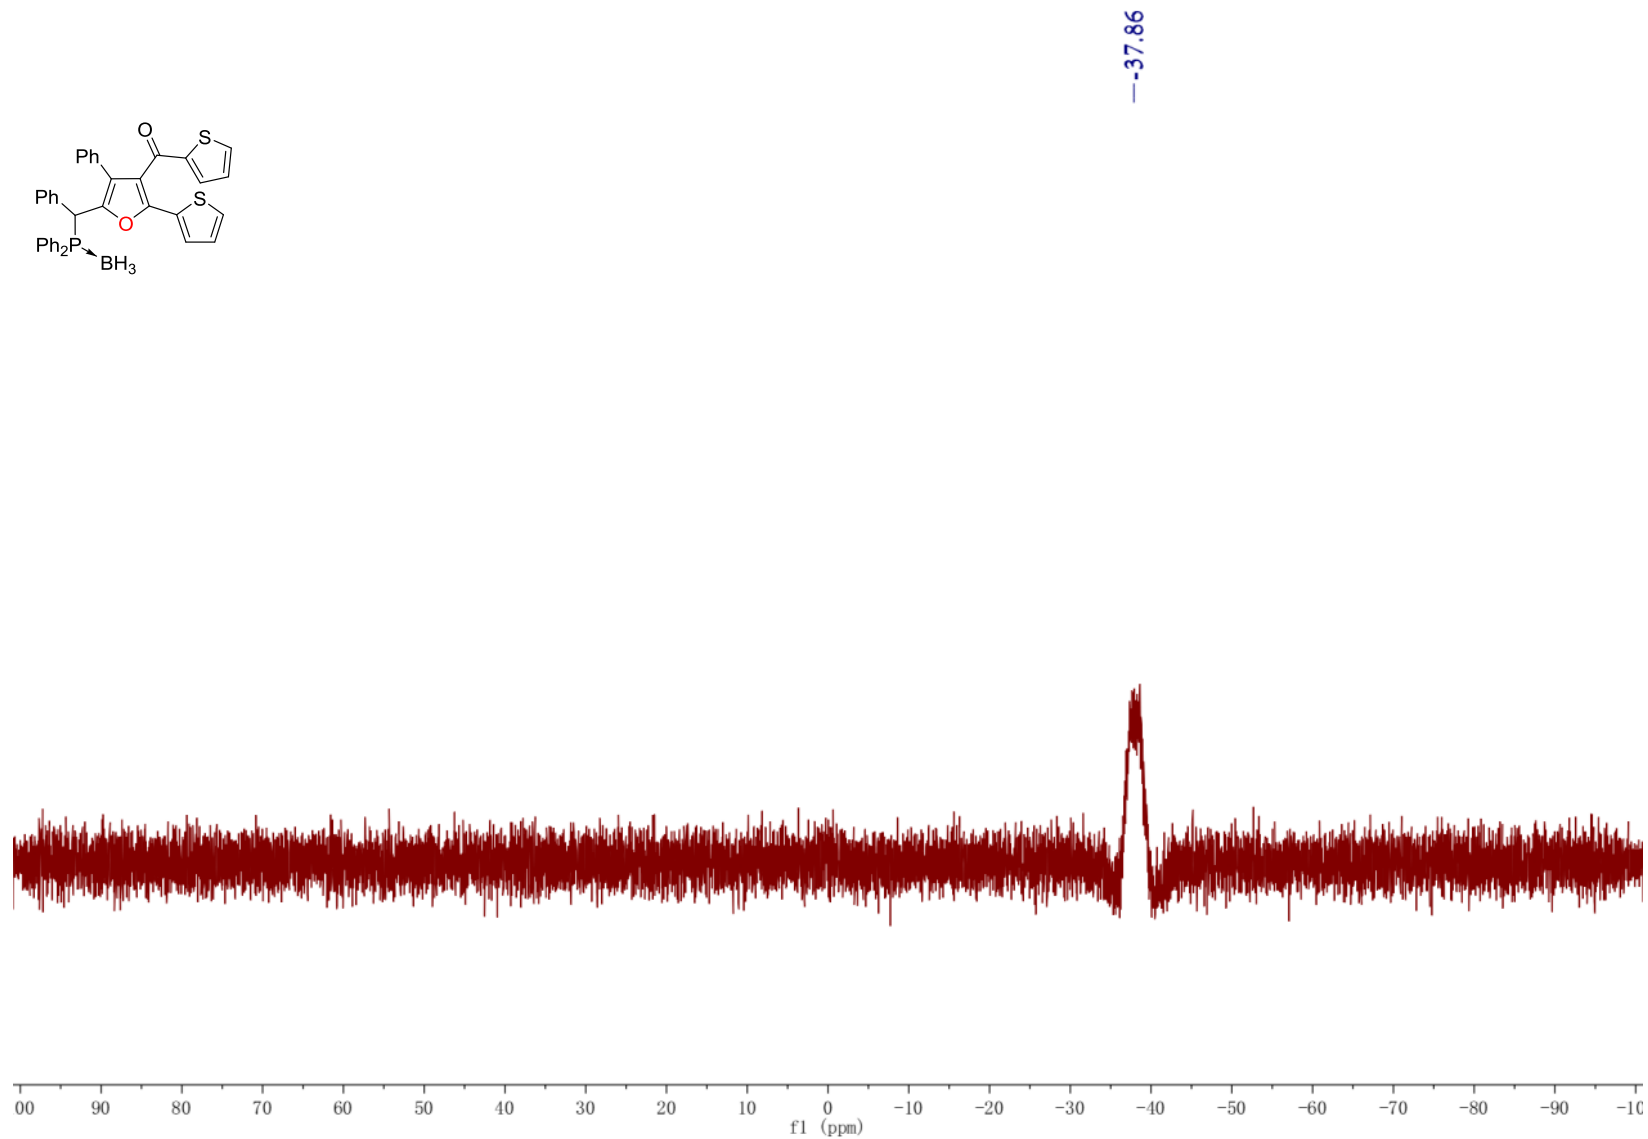

<sup>11</sup>B {<sup>1</sup>H} NMR (CDCl<sub>3</sub>, 128 MHz) of compound **3m**

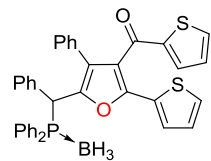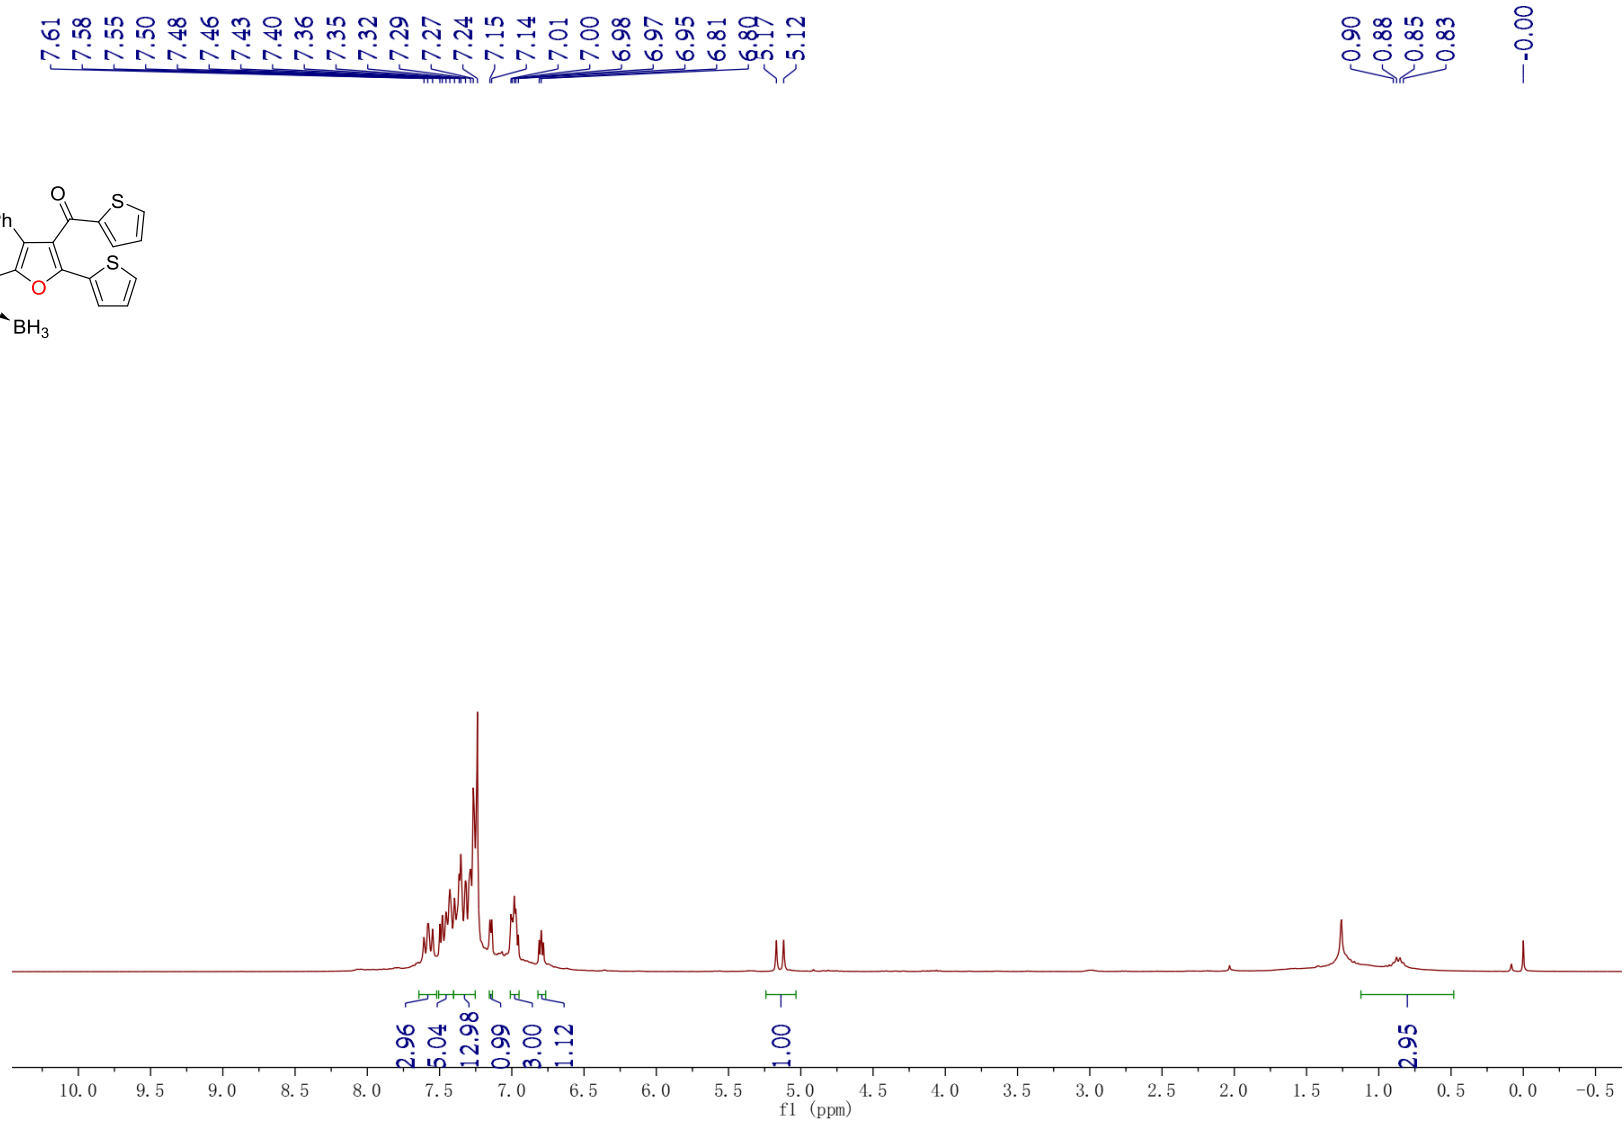

<sup>1</sup>H NMR (CDCl<sub>3</sub>, 300 MHz) of compound **3m**

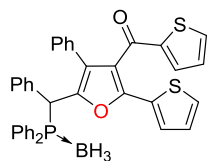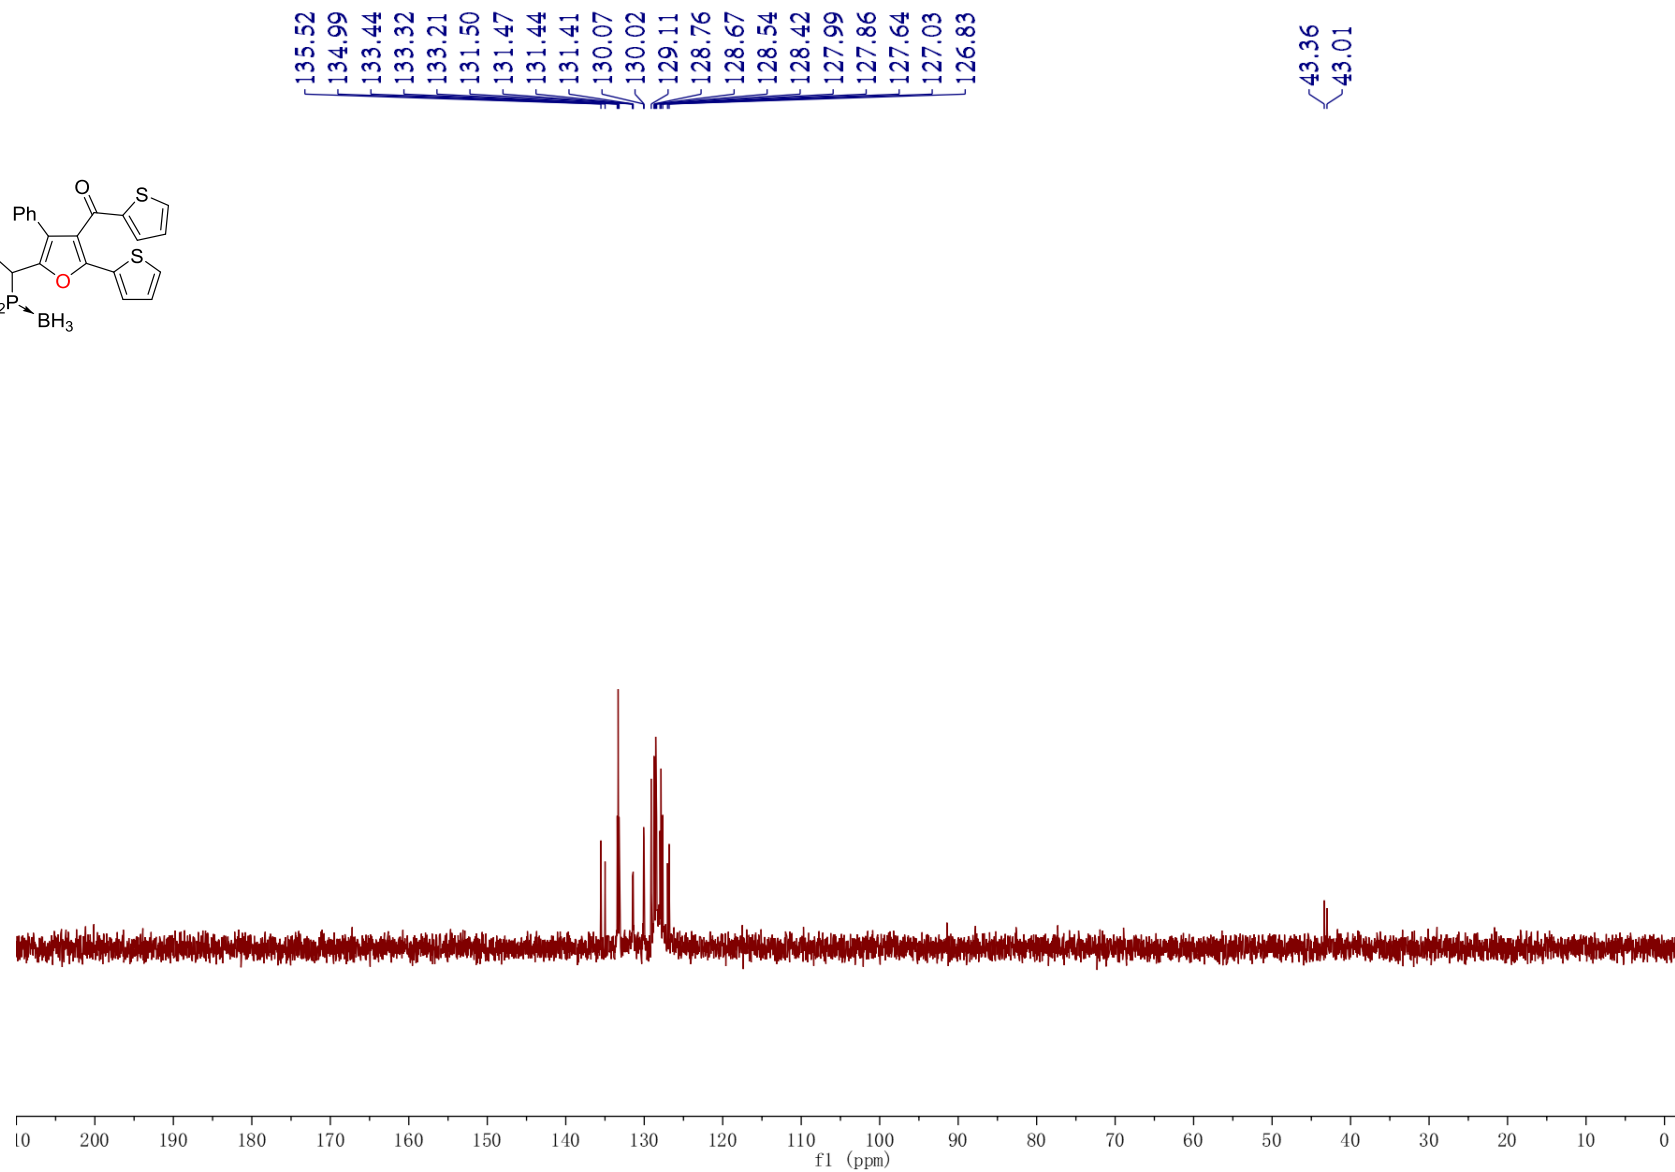

Dept 135 NMR (CDCl<sub>3</sub>, 75 MHz) of Compound **3m**

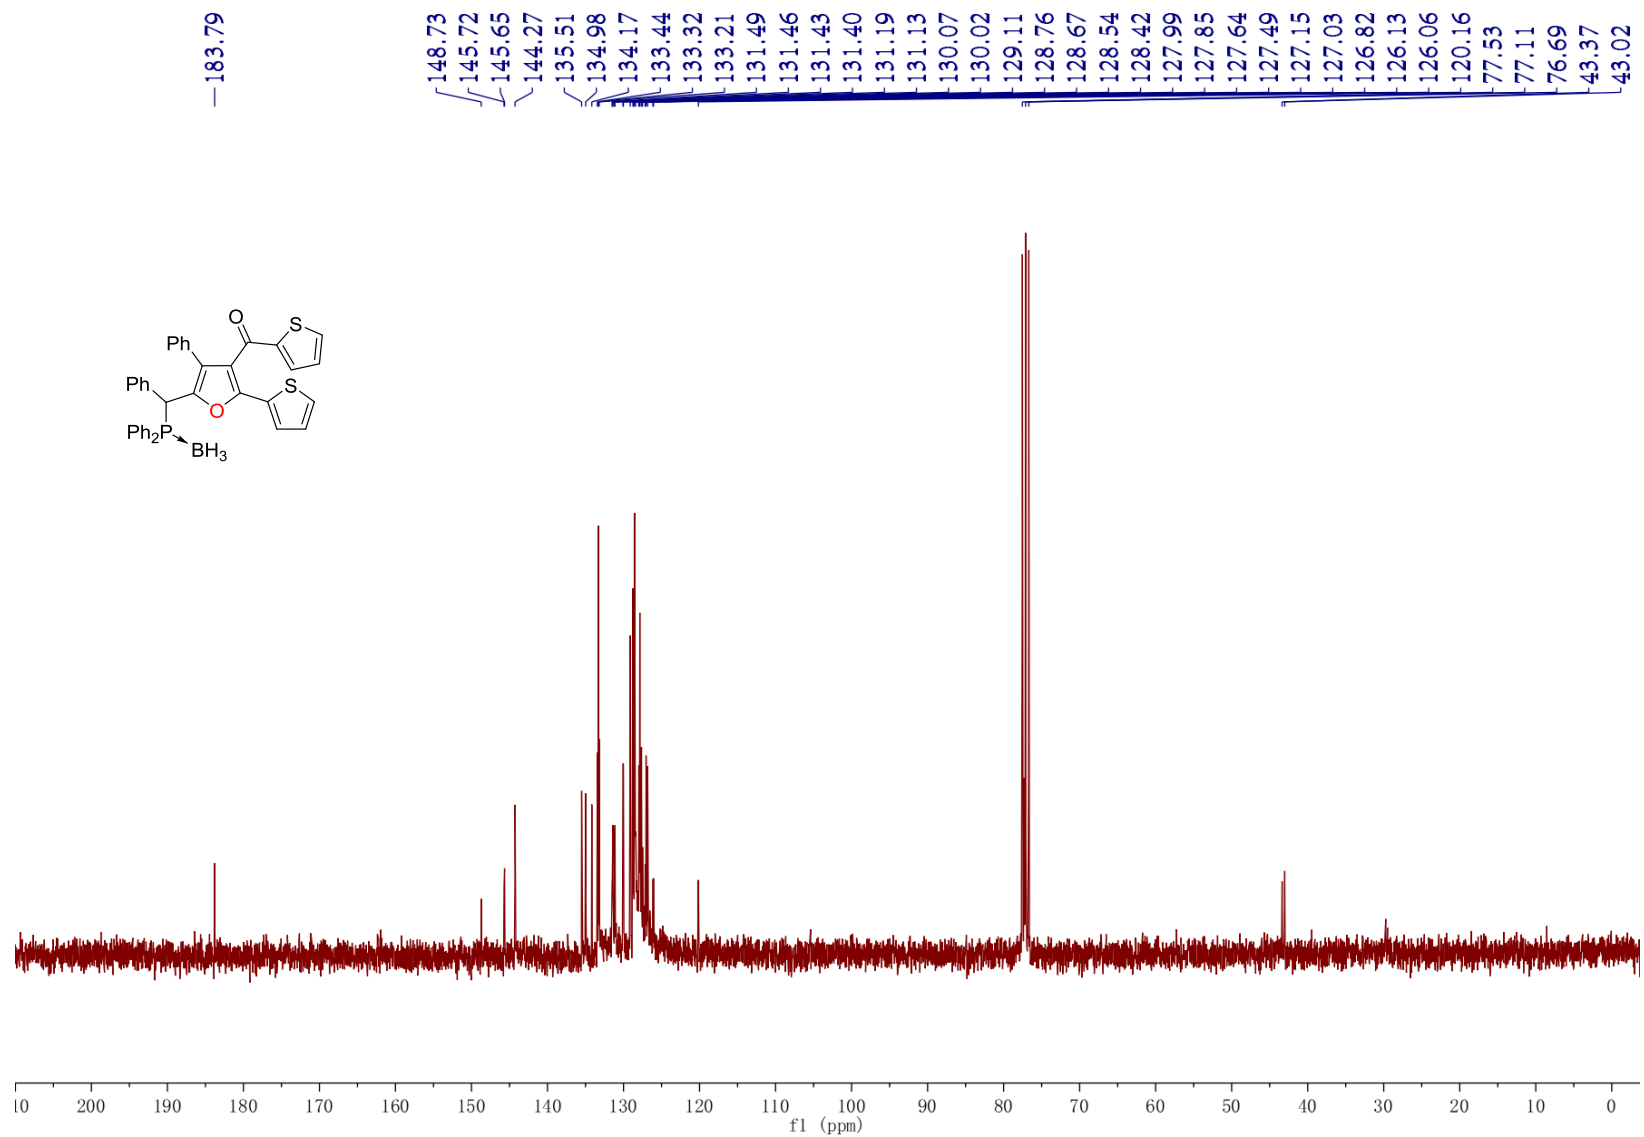

$^{13}\text{C}$   $\{^1\text{H}\}$  NMR (CDCl<sub>3</sub>, 75 MHz) of compound **3m**

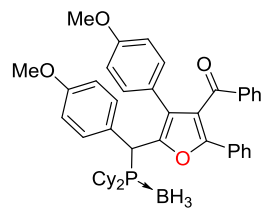

—38.45

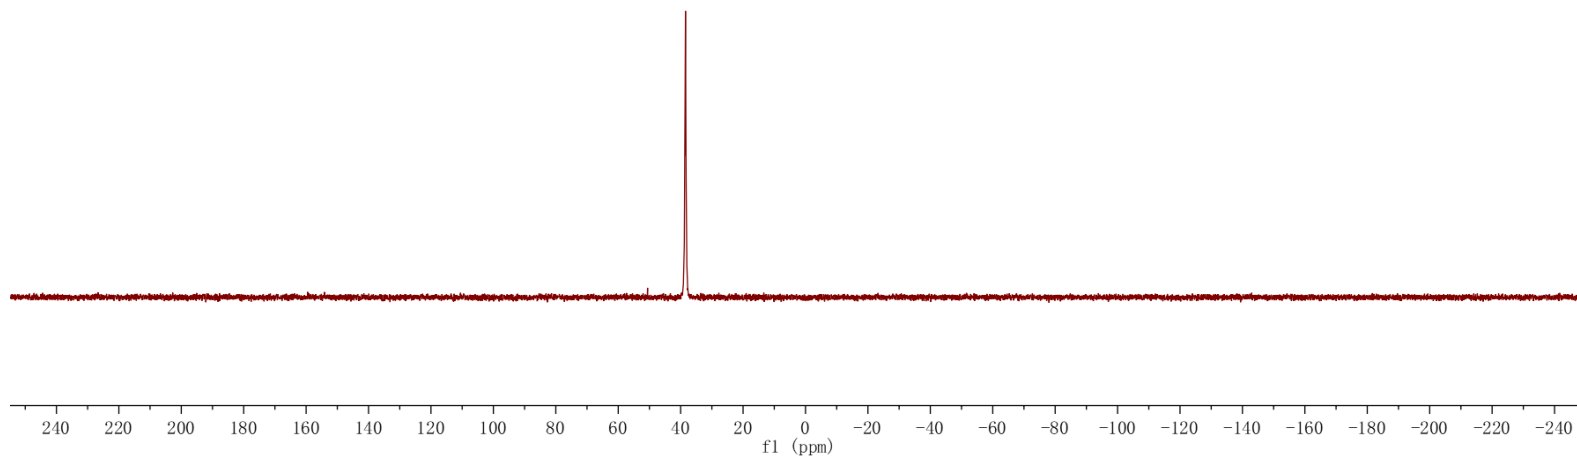

$^{31}\text{P}$  { $^1\text{H}$ } NMR ( $\text{CDCl}_3$ , 162 MHz) of compound **3n**

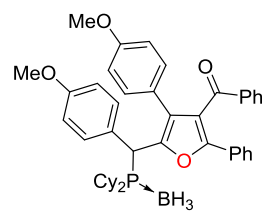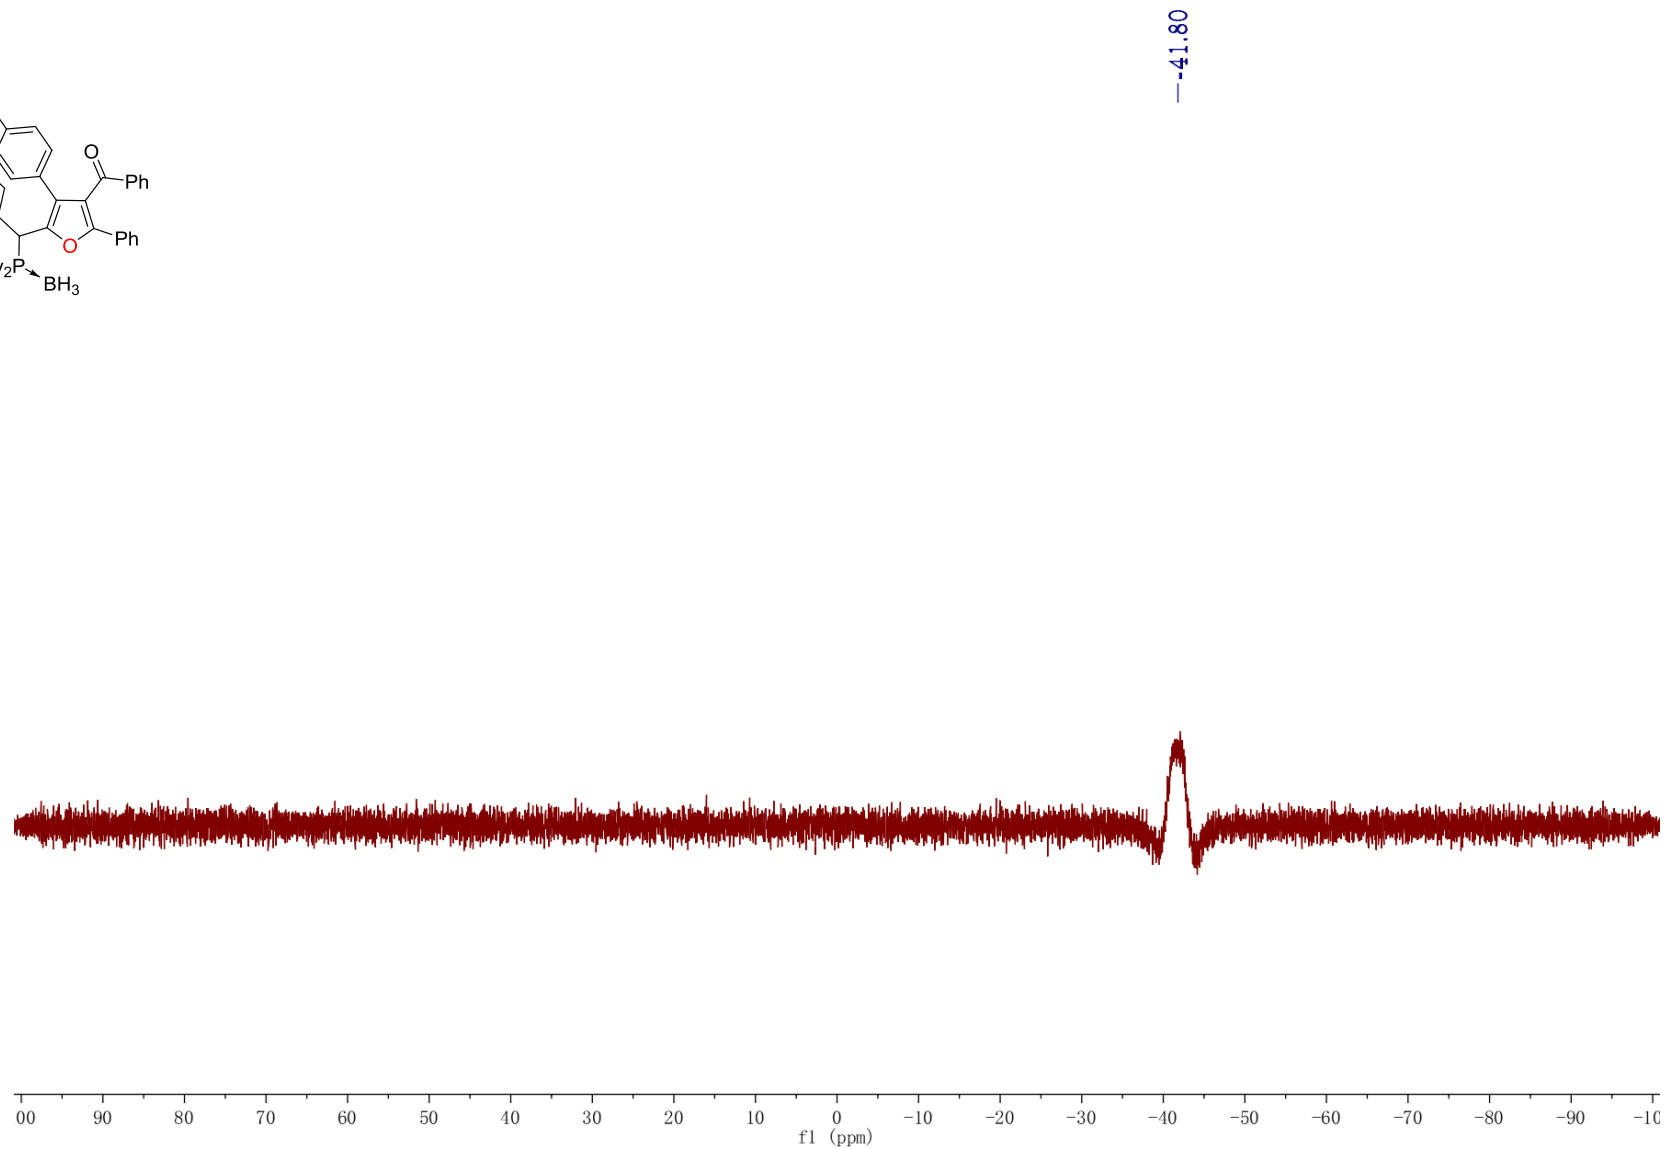

$^{11}\text{B}$  { $^1\text{H}$ } NMR ( $\text{CDCl}_3$ , 128 MHz) of compound **3n**

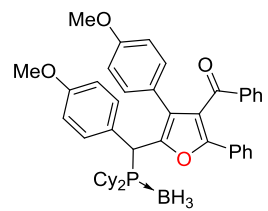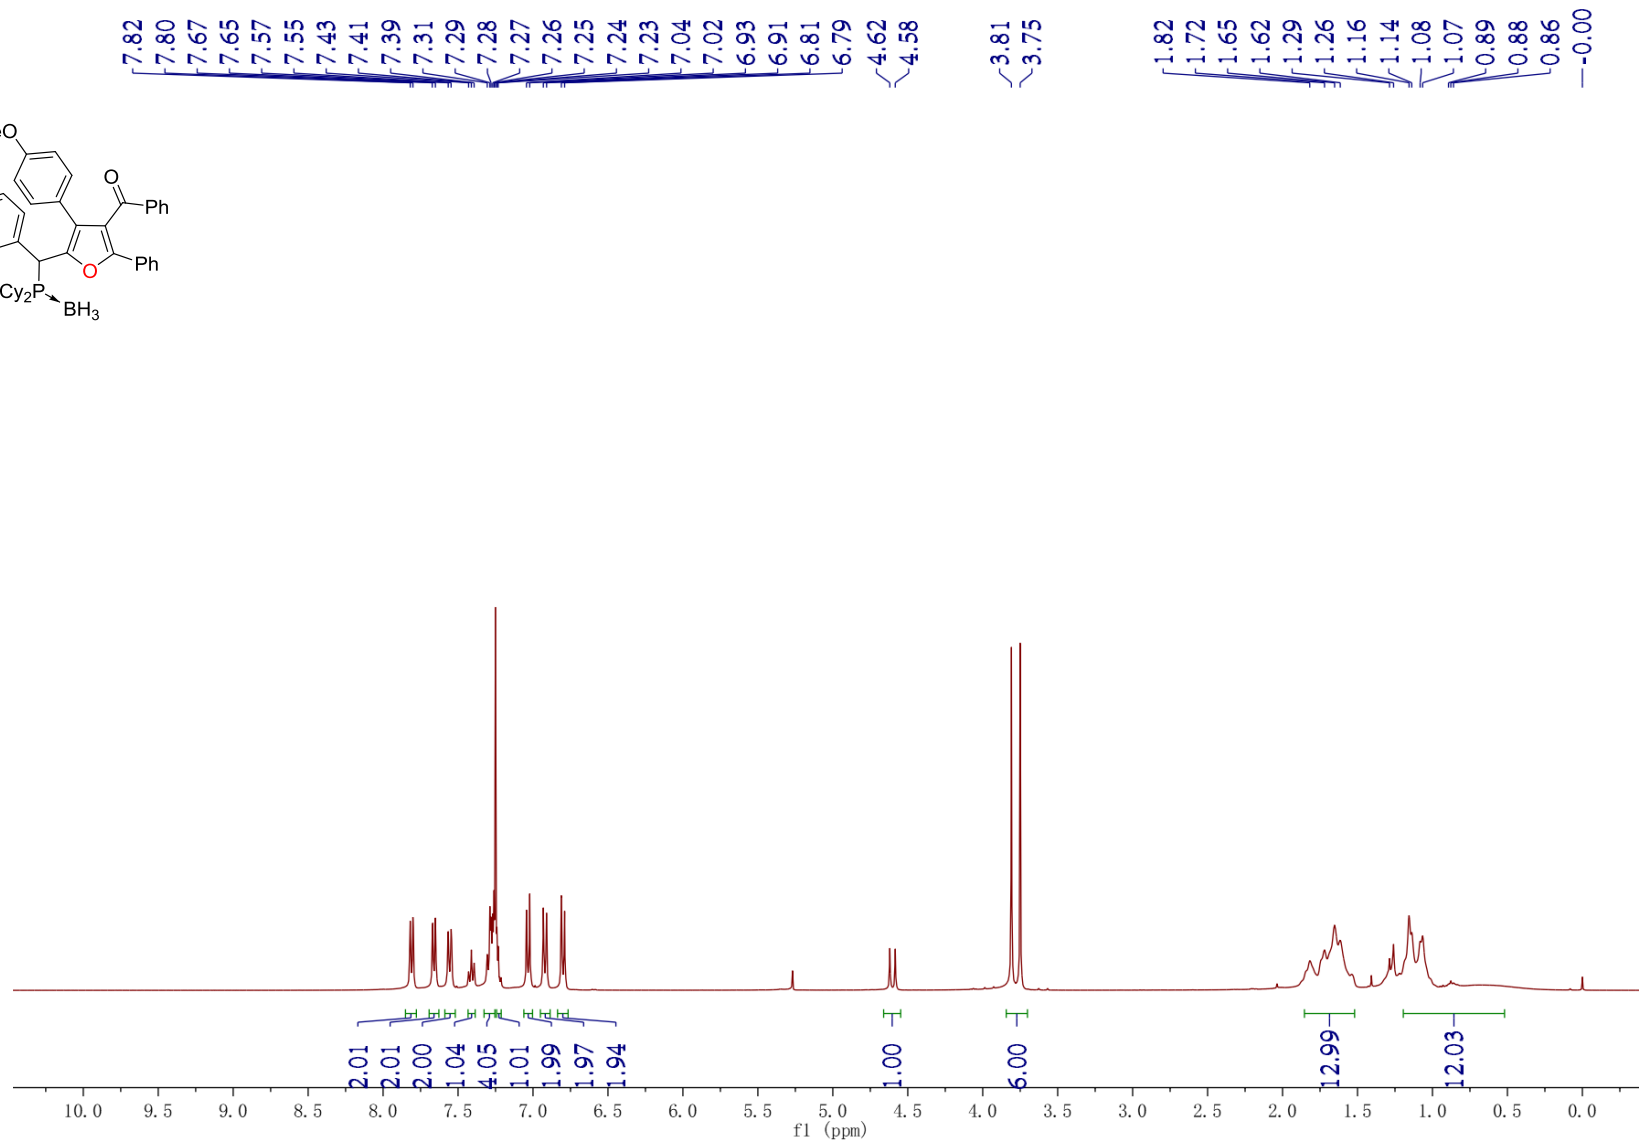

$^1\text{H}$  NMR ( $\text{CDCl}_3$ , 400 MHz) of compound **3n**



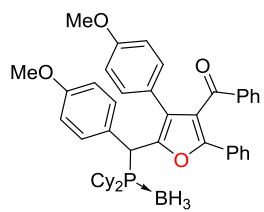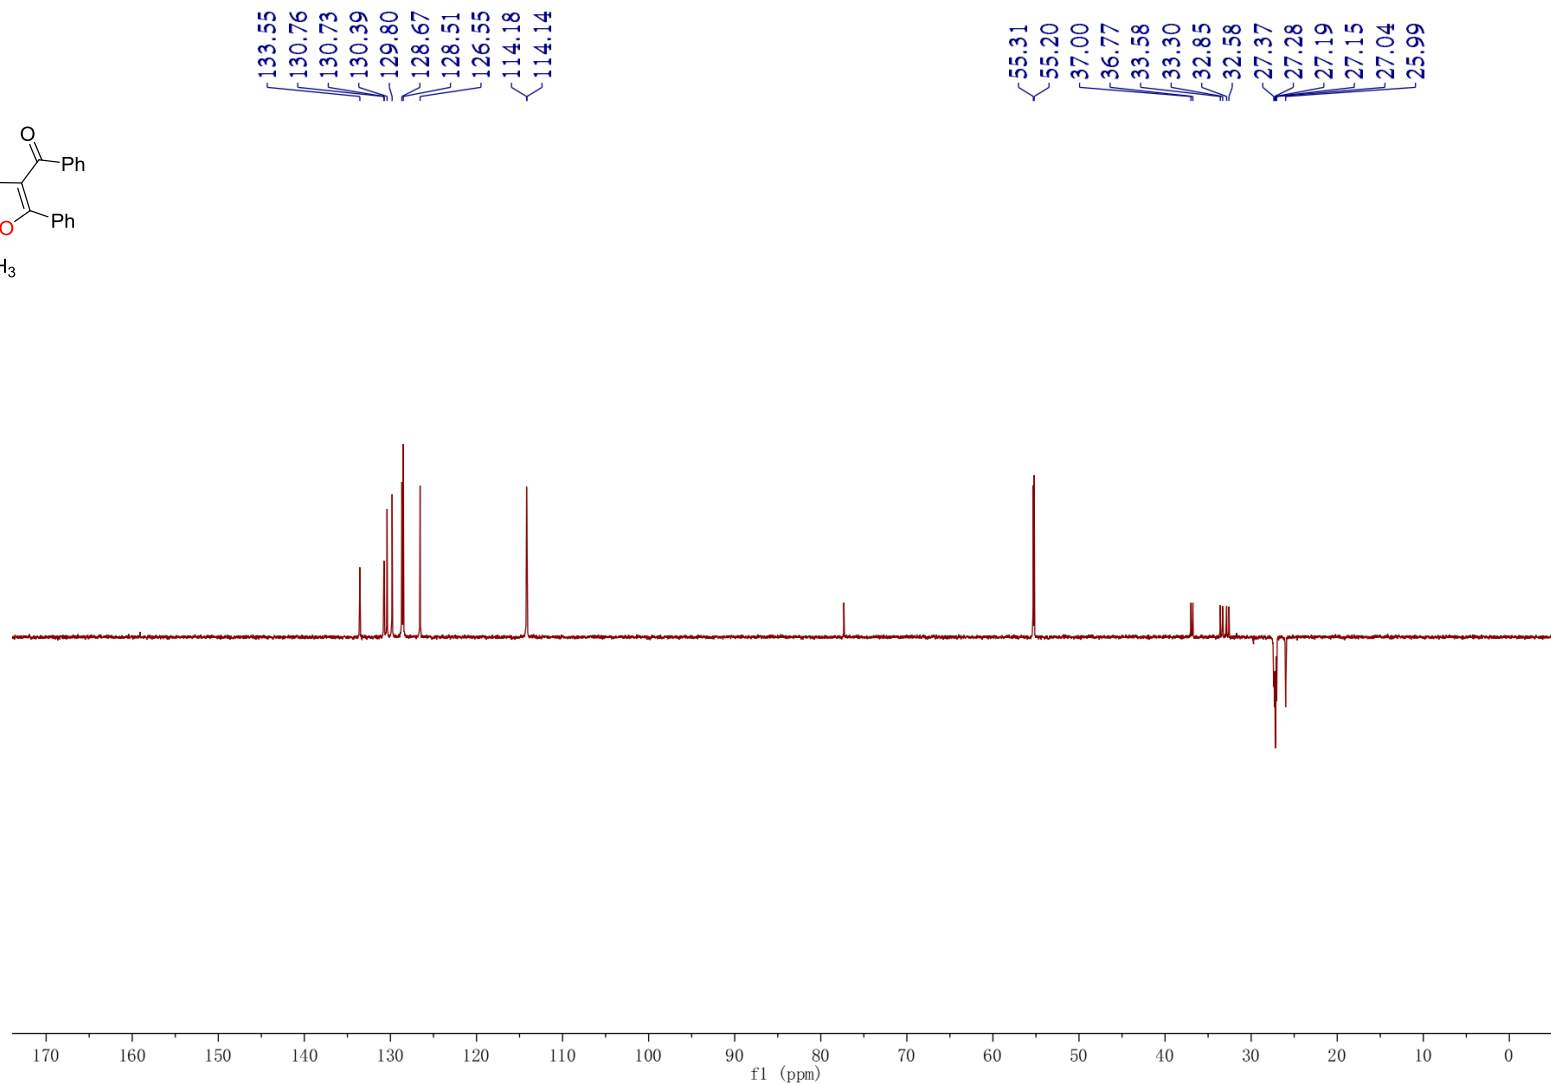

Dept 135 NMR (CDCl<sub>3</sub>, 101 MHz) of Compound 3n

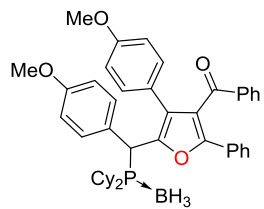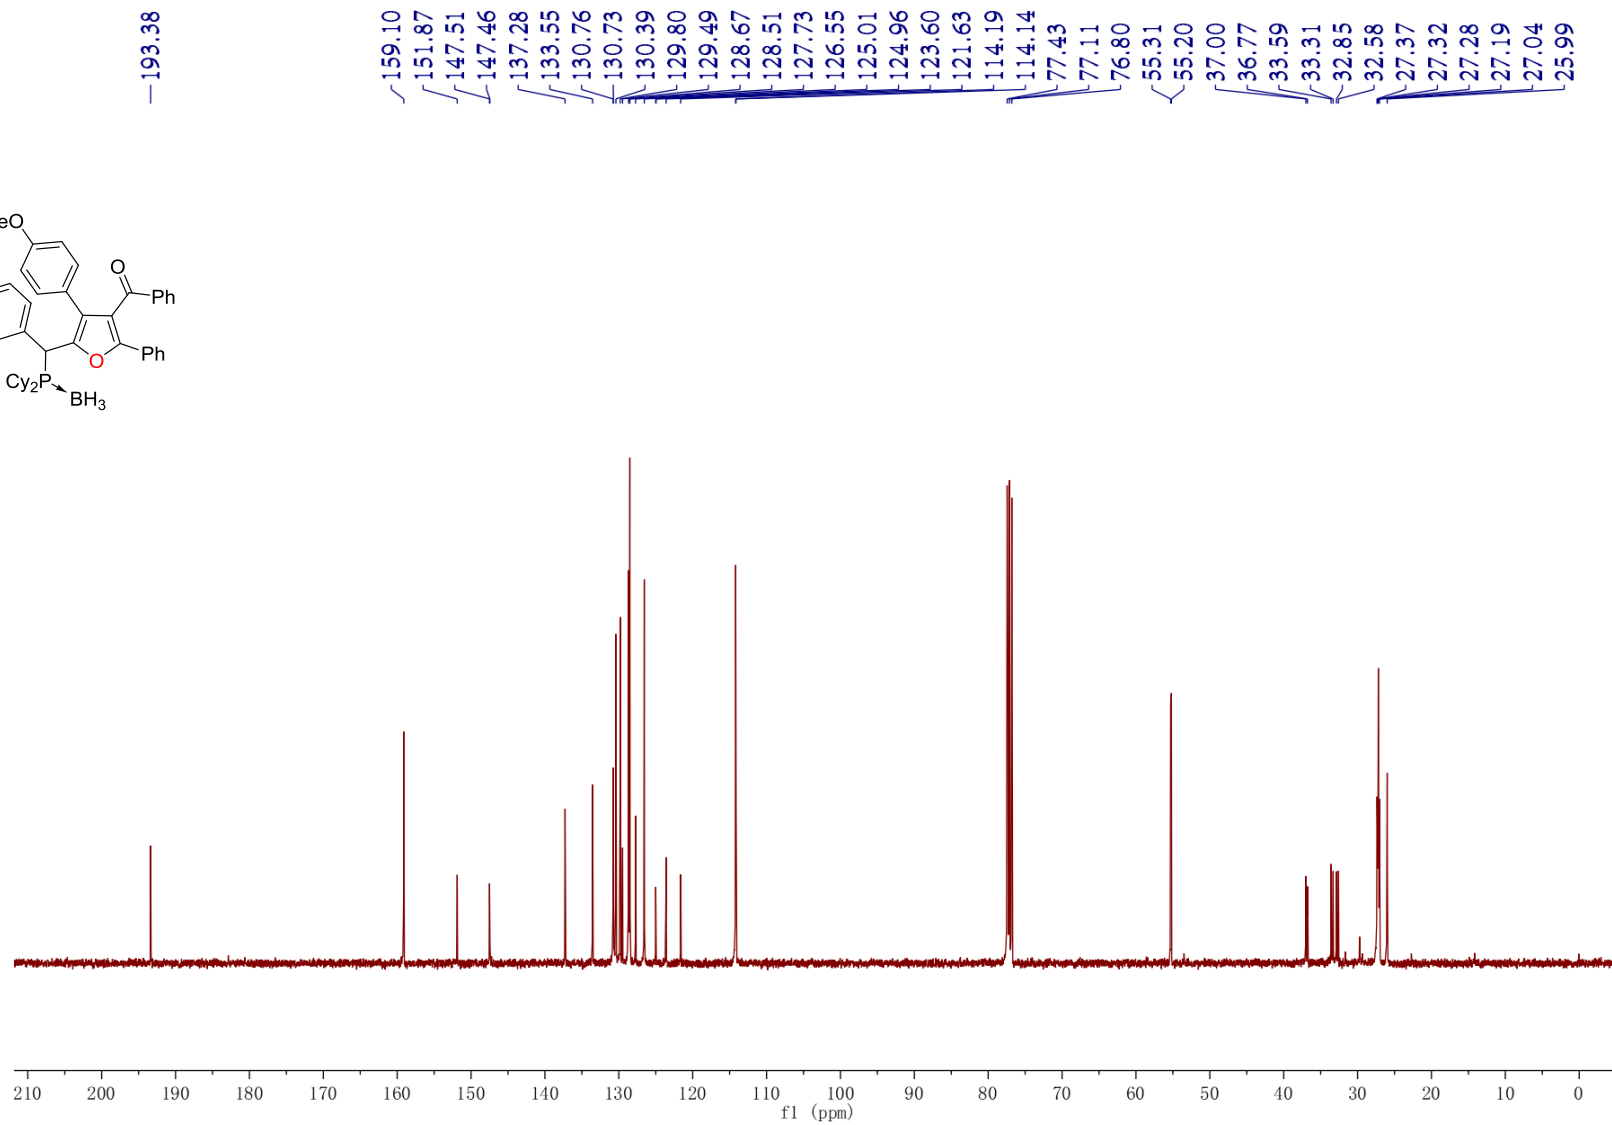

$^{13}\text{C} \{^1\text{H}\}$  NMR ( $\text{CDCl}_3$ , 101 MHz) of compound **3n**

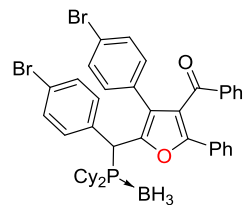

—40.16

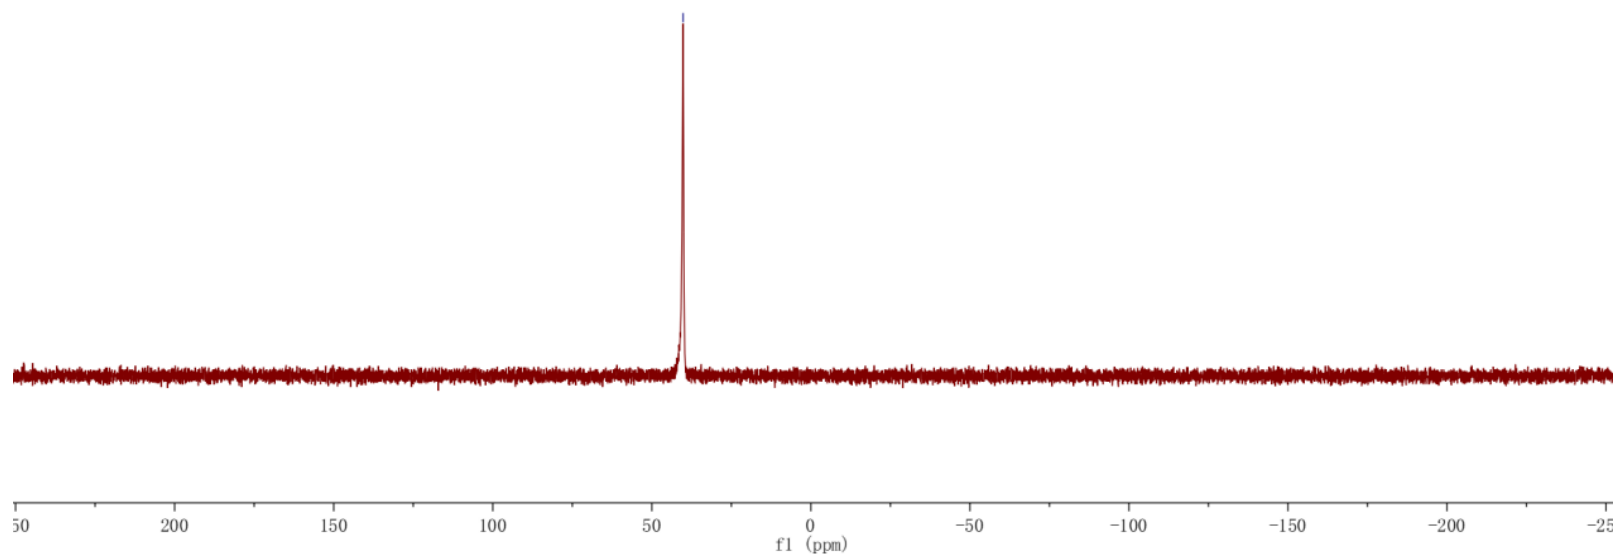

<sup>31</sup>P {<sup>1</sup>H} NMR (CDCl<sub>3</sub>, 162 MHz) of compound **3o**

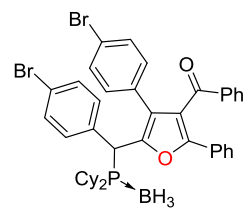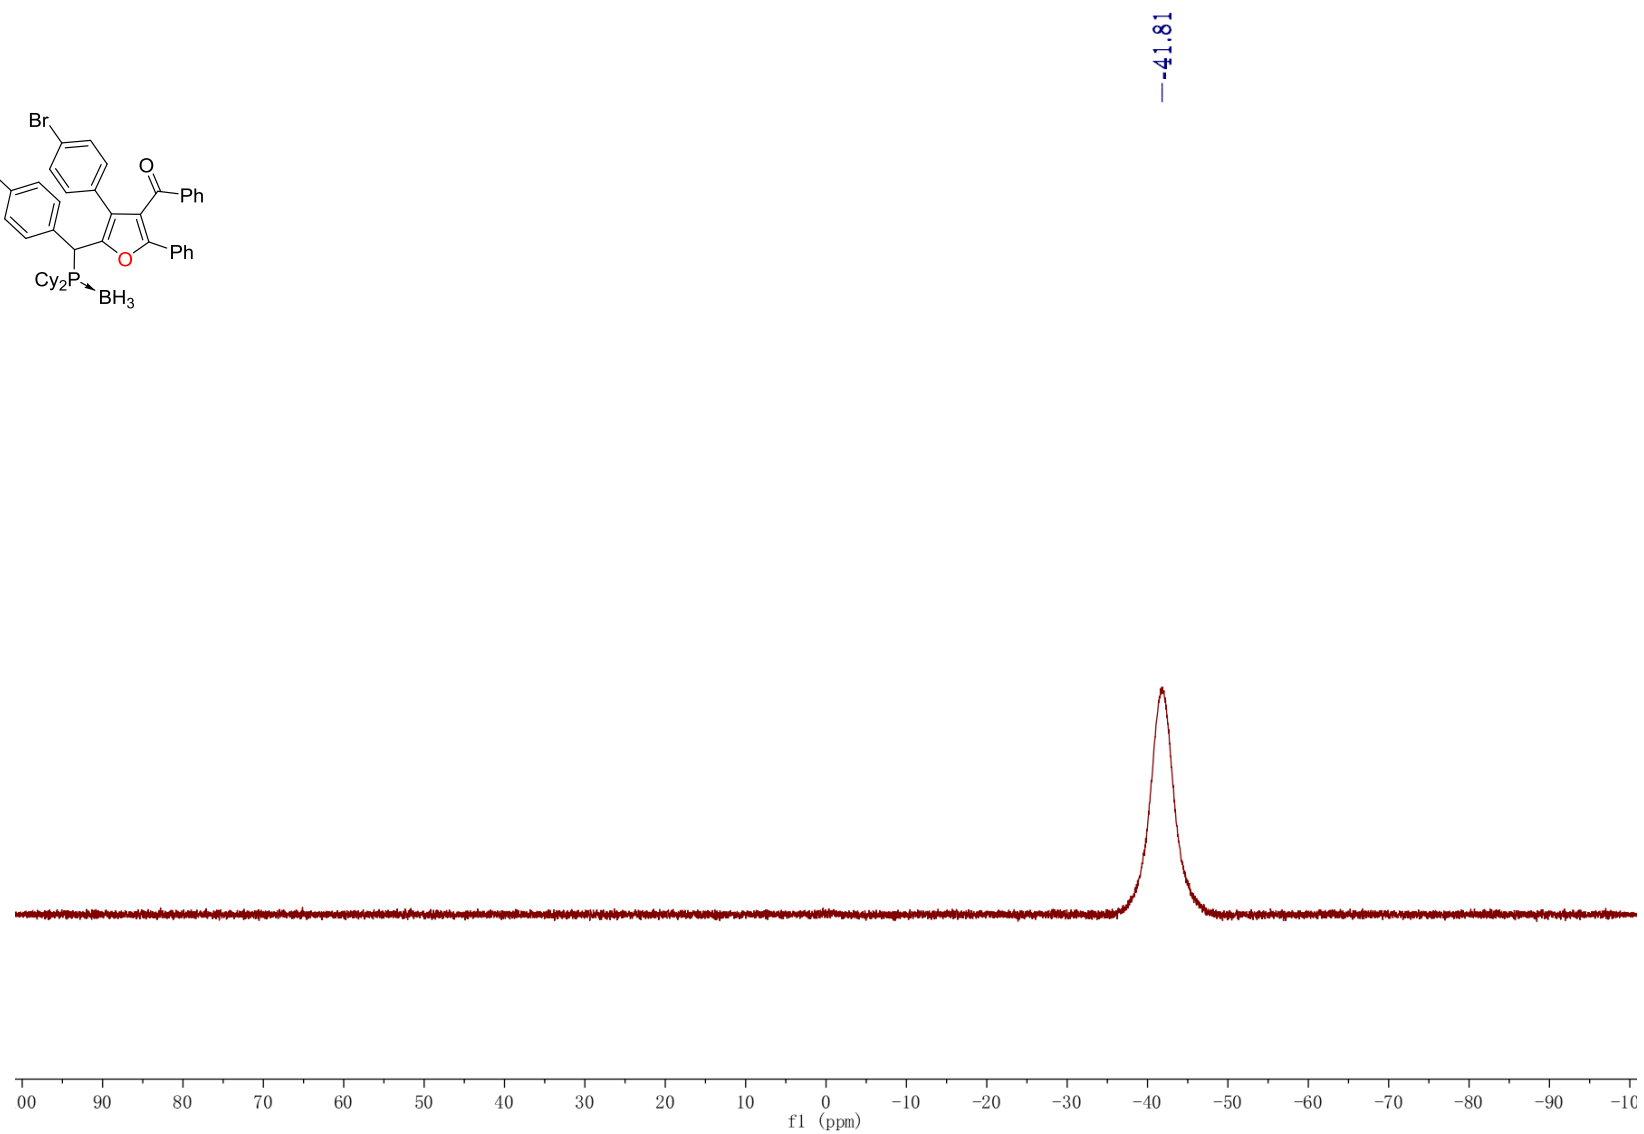

$^{11}\text{B}$  { $^1\text{H}$ } NMR ( $\text{CDCl}_3$ , 128 MHz) of compound **30**

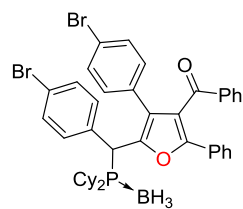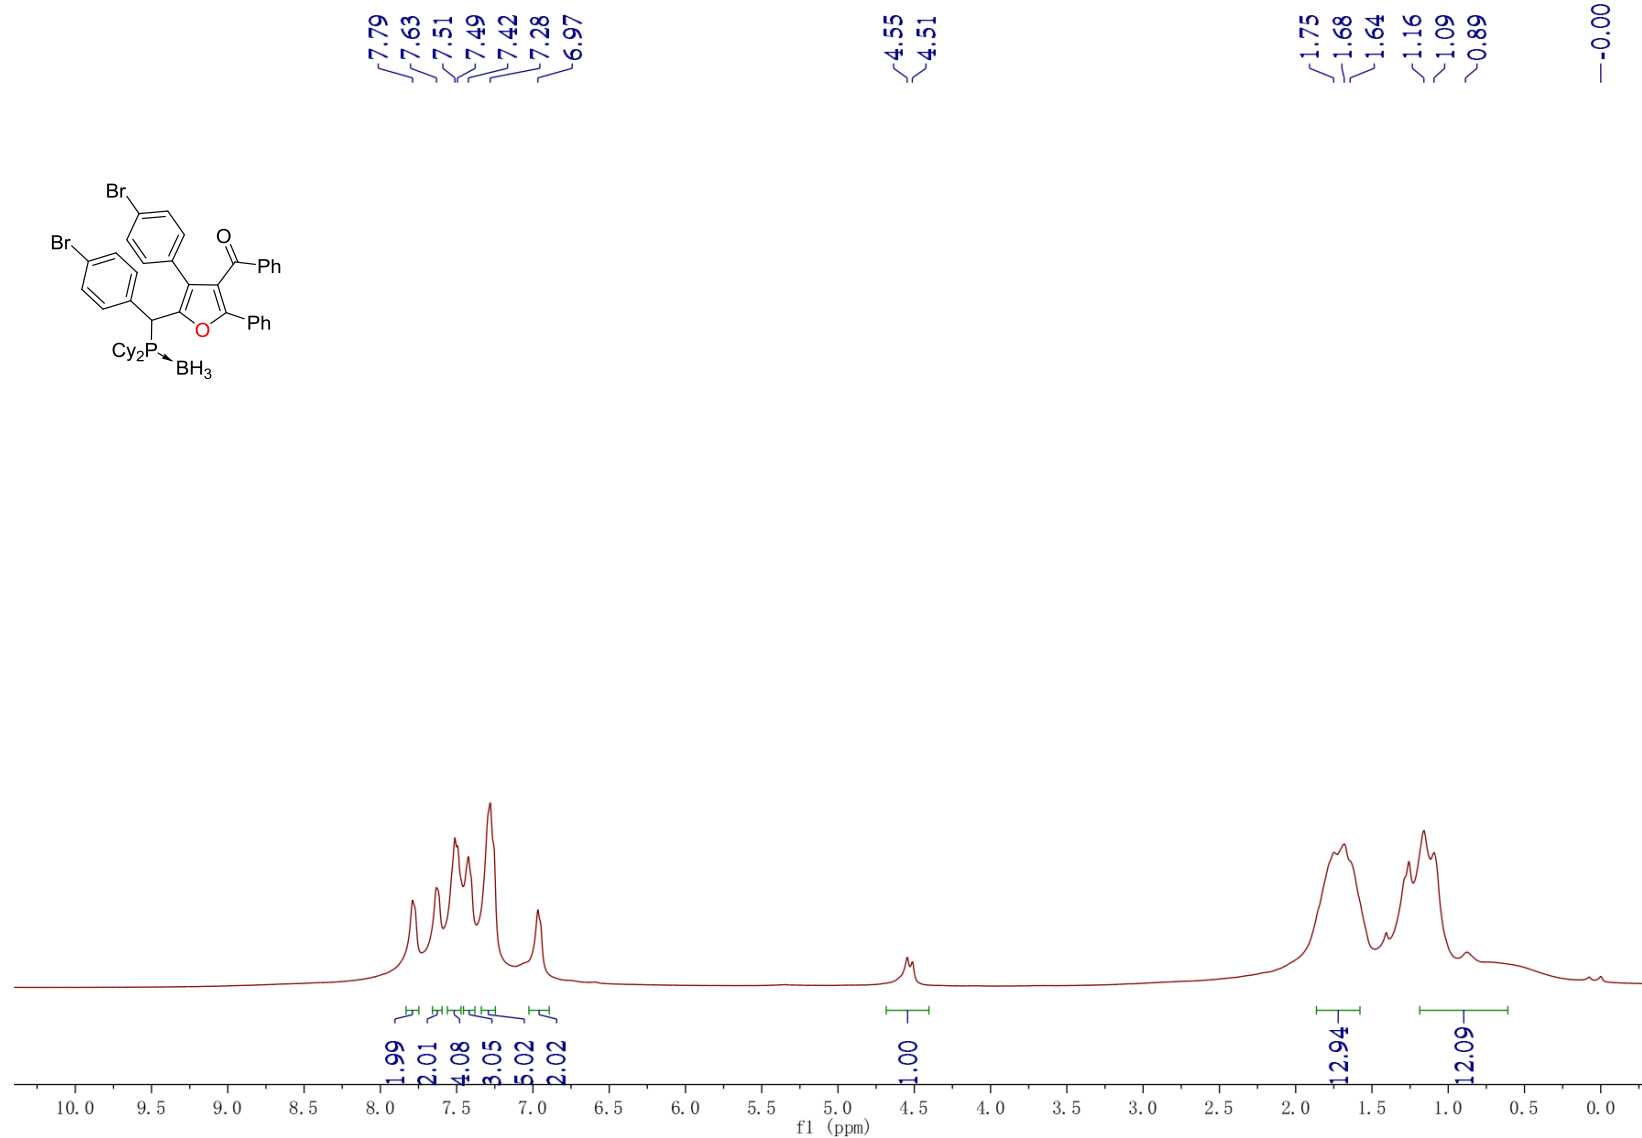

<sup>1</sup>H NMR (CDCl<sub>3</sub>, 400 MHz) of compound **3o**

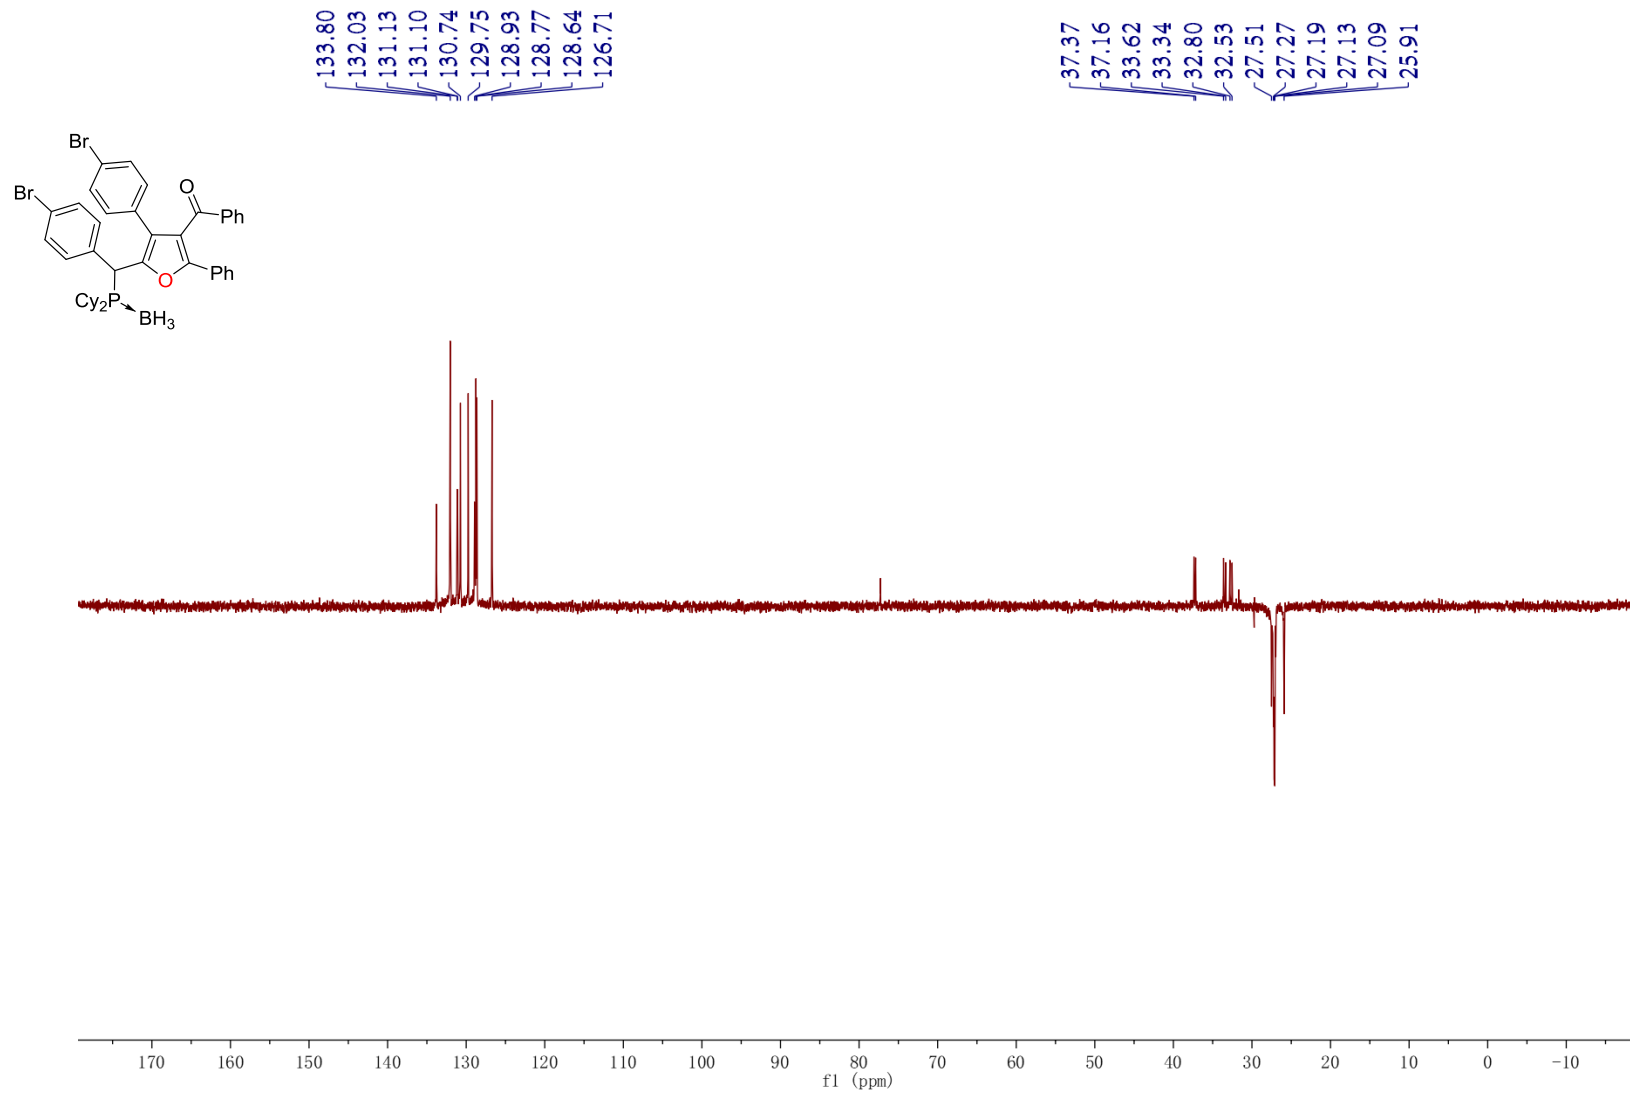

Dept 135 NMR ( $\text{CDCl}_3$ , 101 MHz) of Compound **3o**

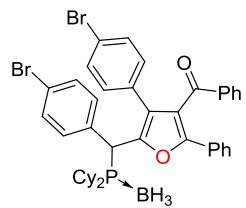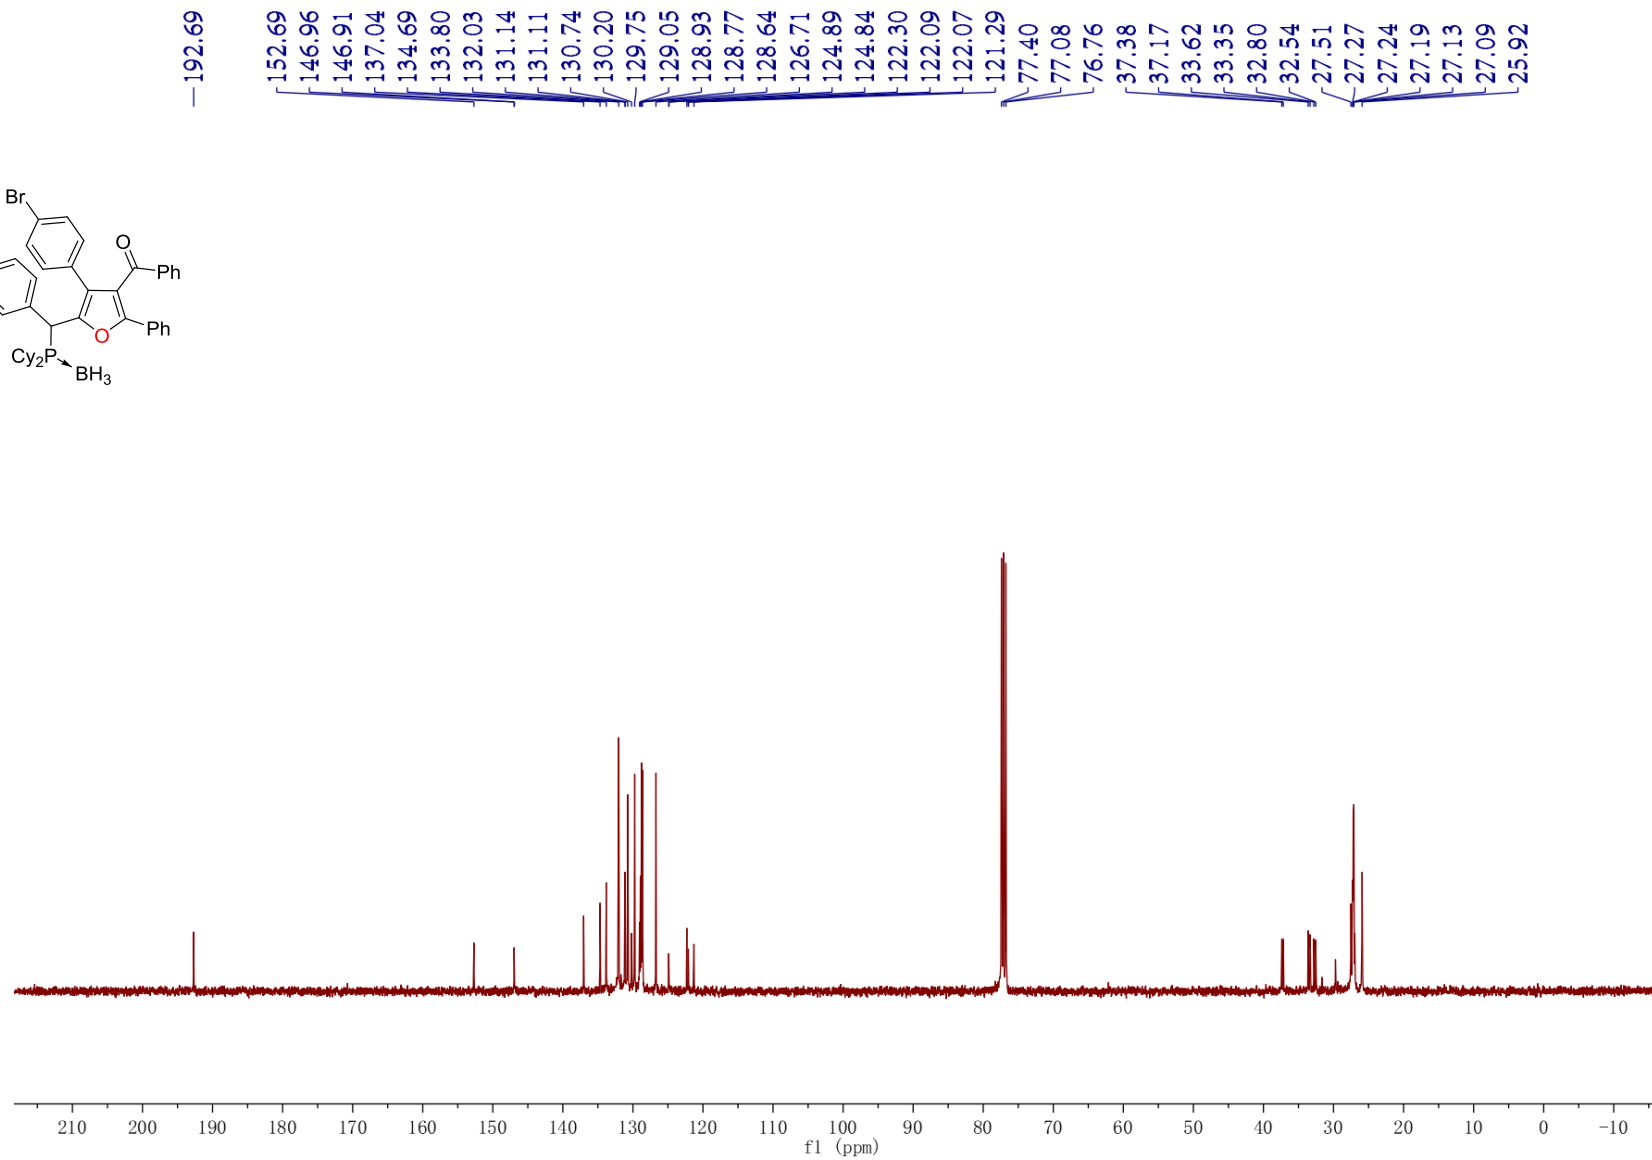

$^{13}\text{C} \{^1\text{H}\}$  NMR ( $\text{CDCl}_3$ , 101 MHz) of compound **3o**

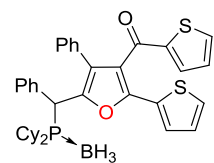

-39.82

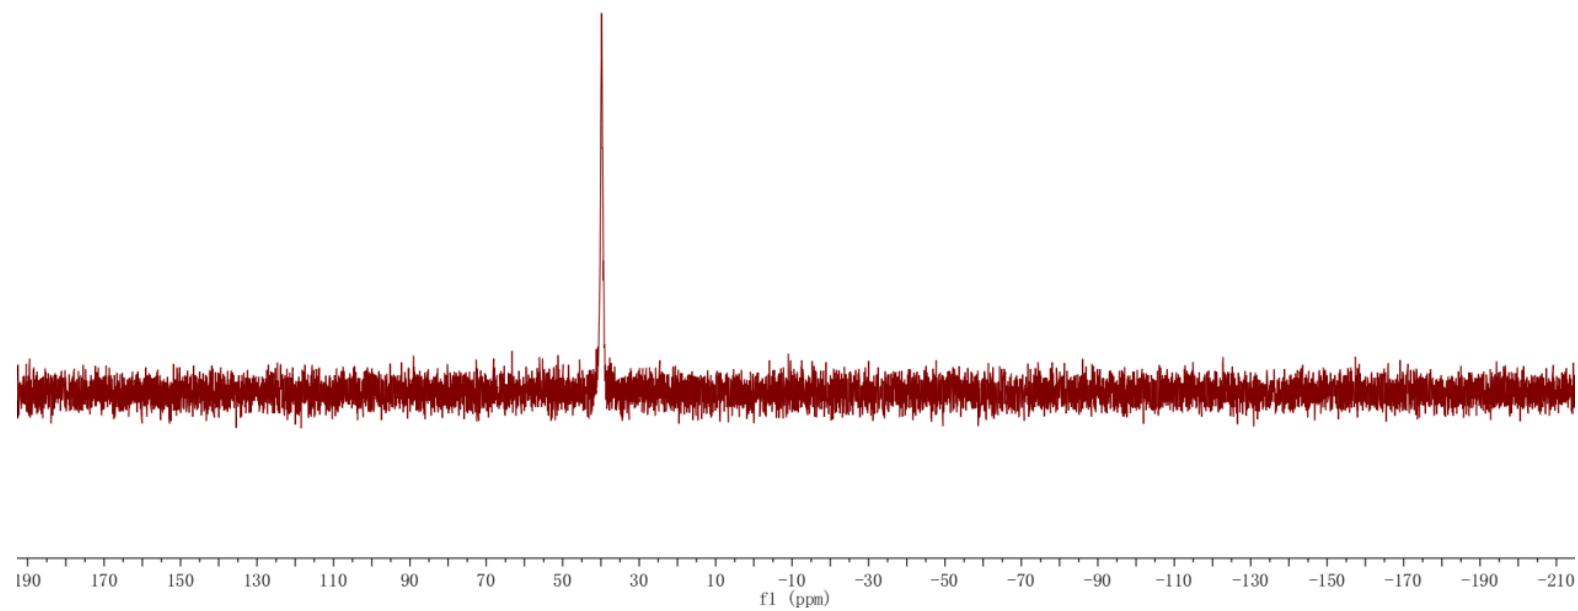

$^{31}\text{P}$   $\{^1\text{H}\}$  NMR ( $\text{CDCl}_3$ , 121 MHz) of compound **3p**



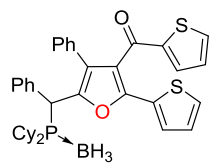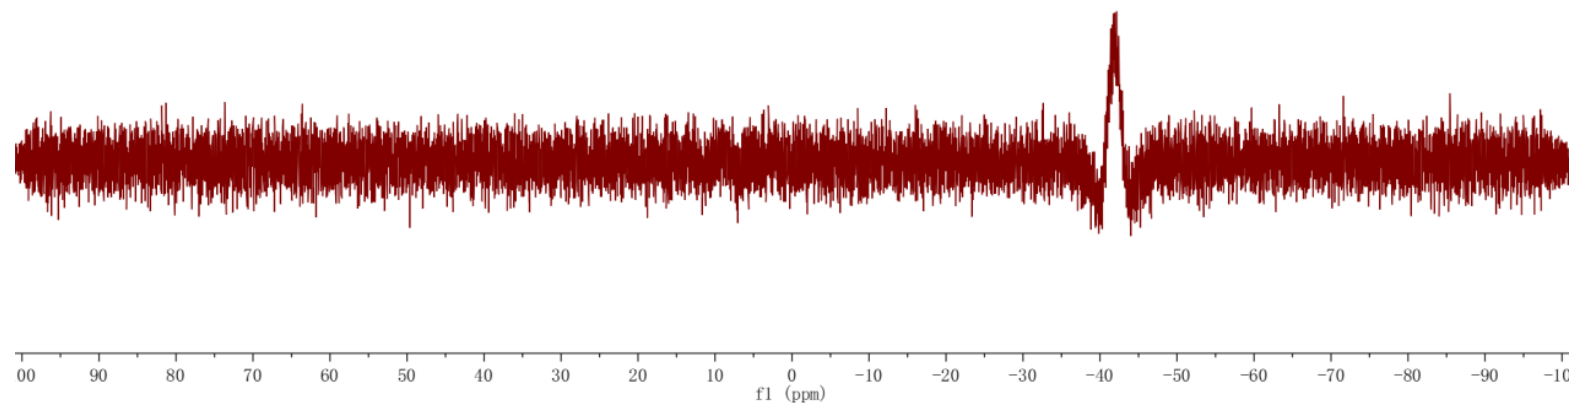

--41.85

$^{11}\text{B}$   $\{^1\text{H}\}$  NMR ( $\text{CDCl}_3$ , 128 MHz) of compound **3p**

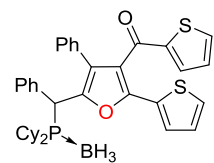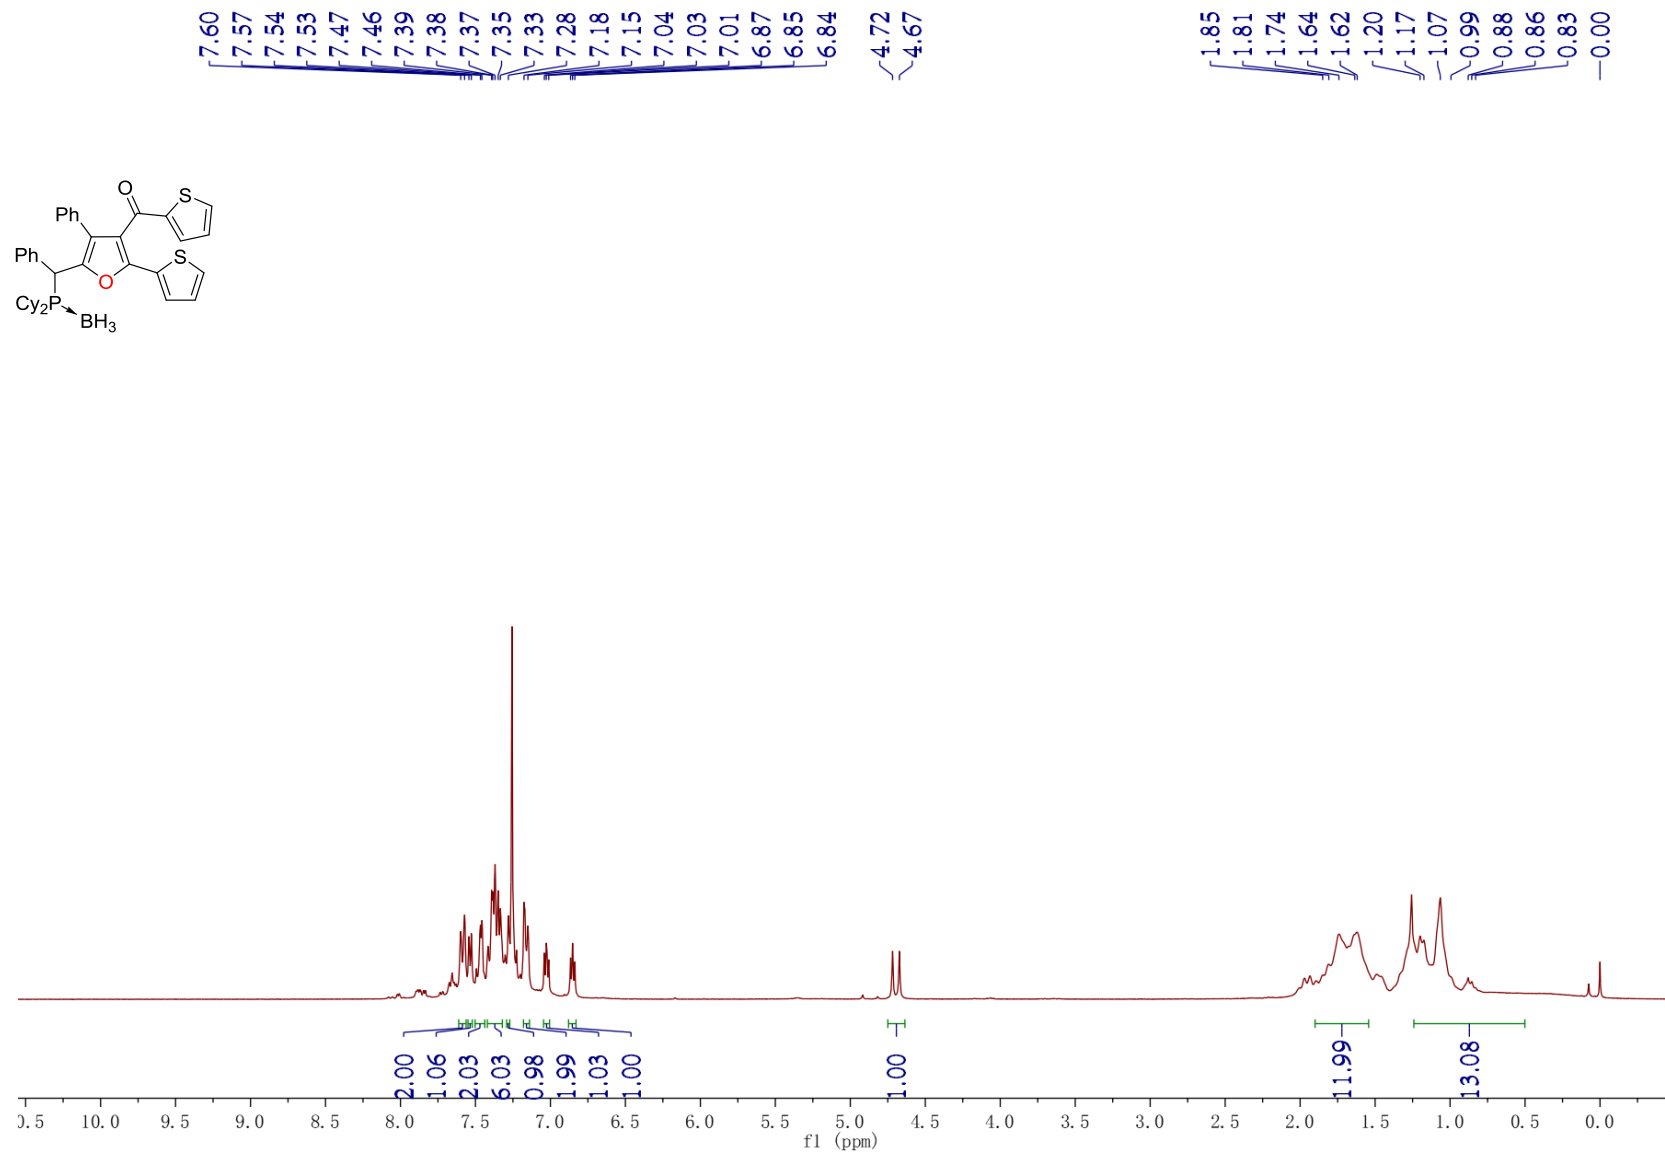

$^1\text{H}$  NMR ( $\text{CDCl}_3$ , 300 MHz) of compound **3p**

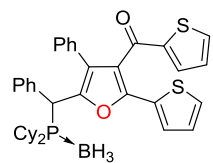

135.50  
135.01  
129.40  
129.37  
129.02  
128.81  
128.15  
127.90  
127.72  
127.71  
126.91  
126.62

37.83  
37.63  
33.38  
33.10  
32.33  
32.07  
27.33  
27.24  
27.17  
27.07  
27.05  
26.97  
25.95

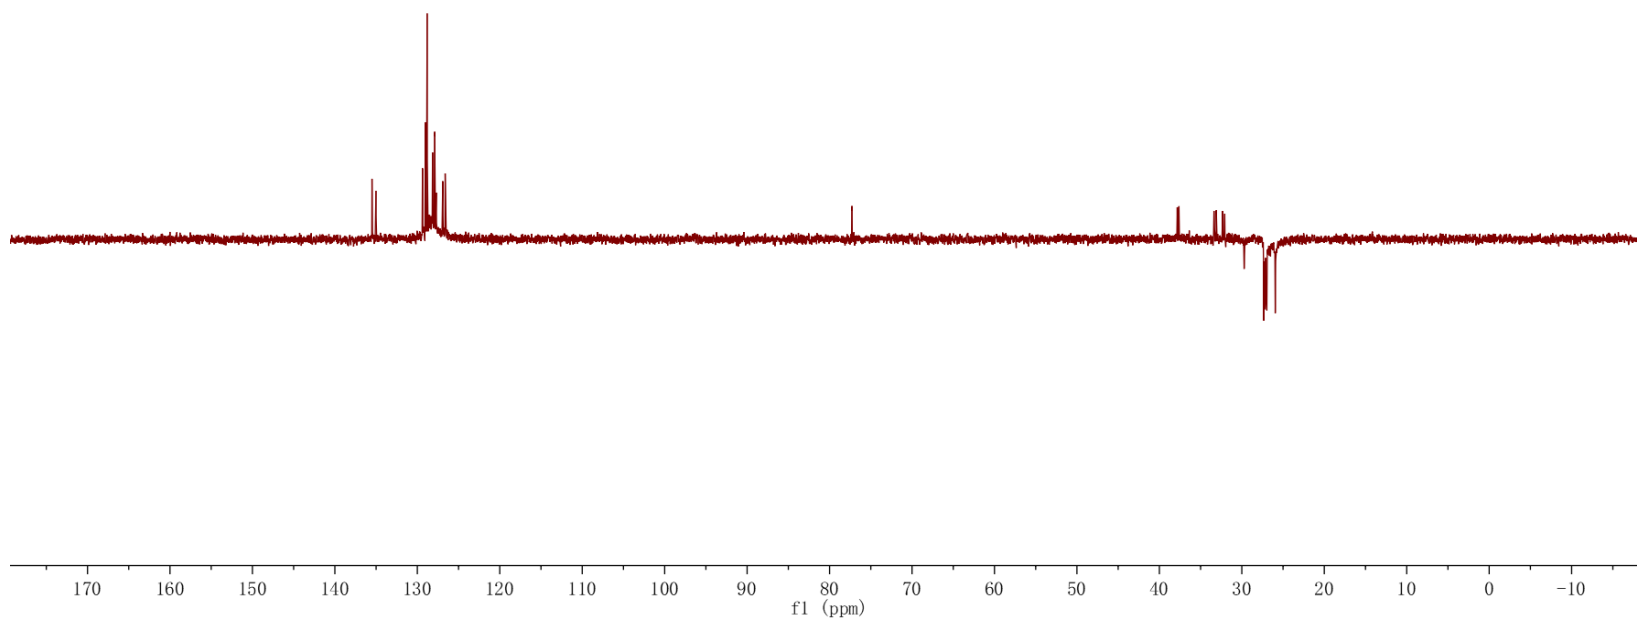

Dept 135 NMR (CDCl<sub>3</sub>, 101 MHz) of Compound **3p**

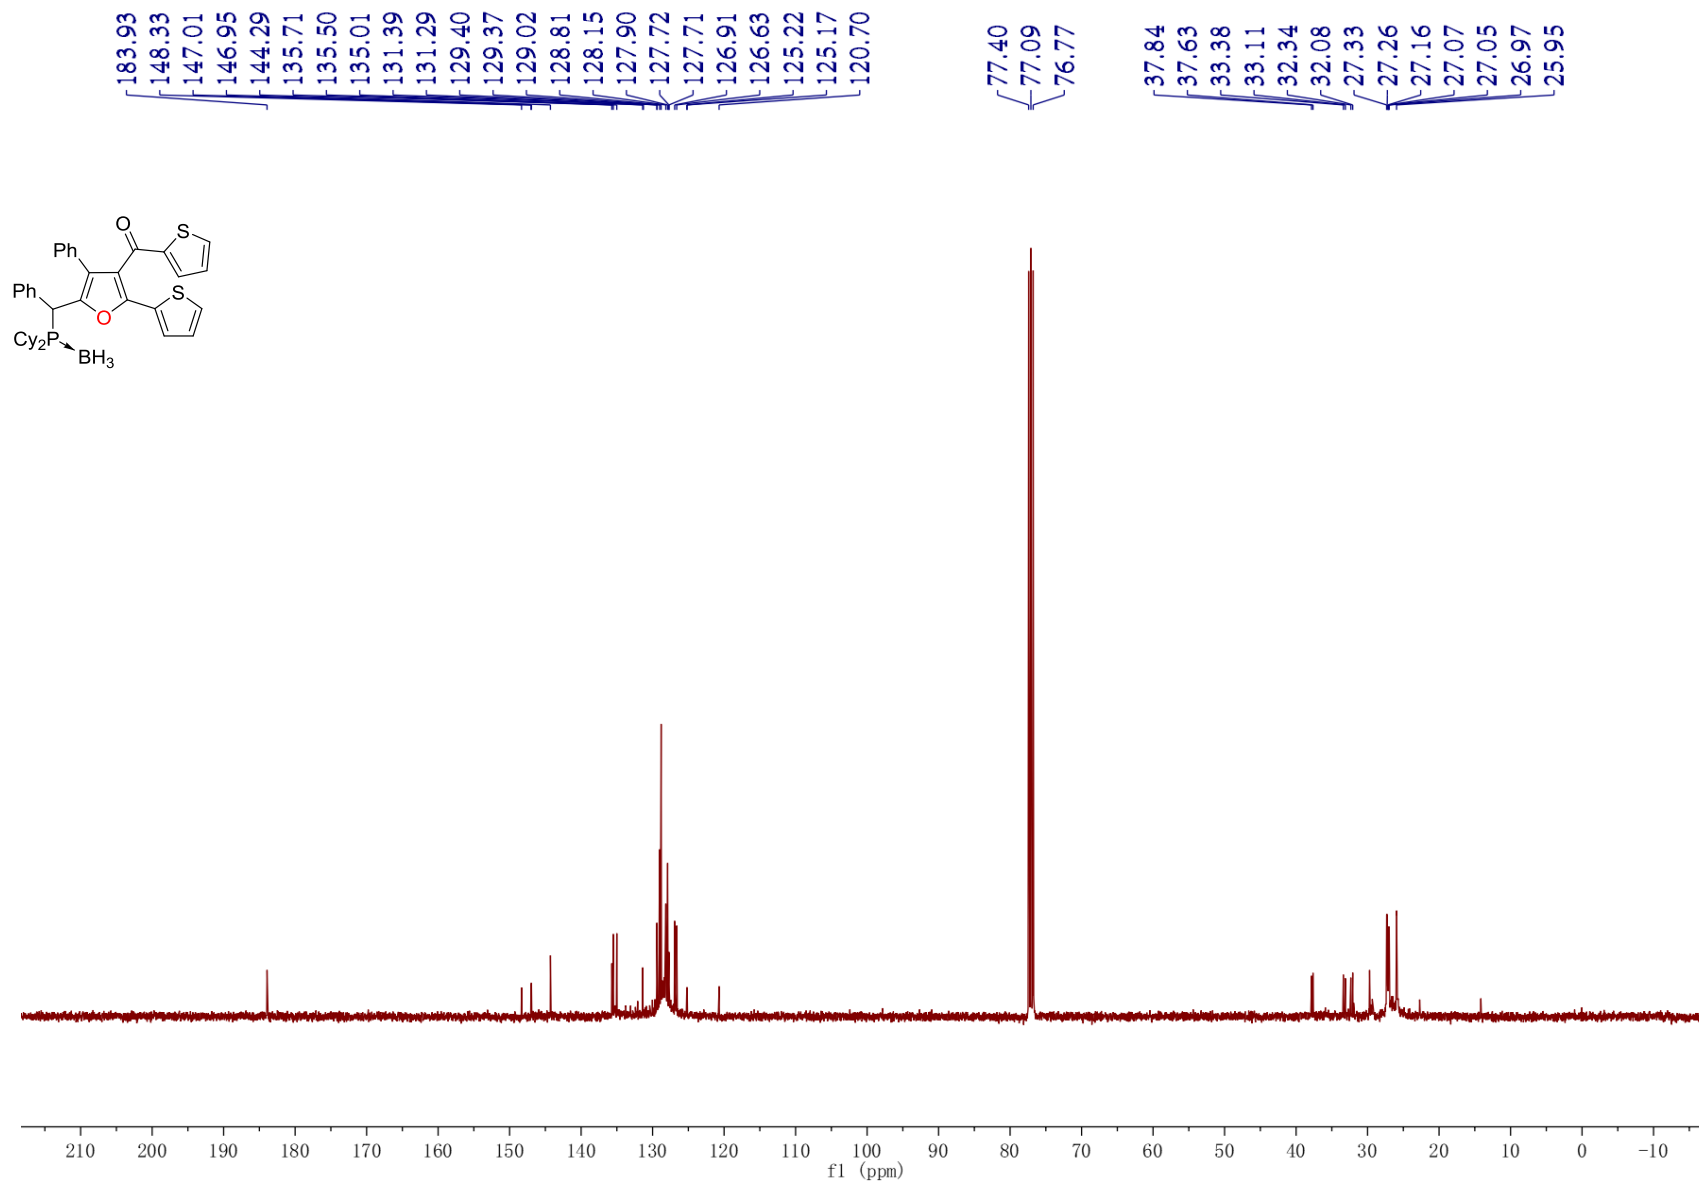

<sup>13</sup>C {<sup>1</sup>H} NMR (CDCl<sub>3</sub>, 101 MHz) of compound **3p**

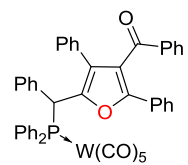

32.60  
31.83  
31.07

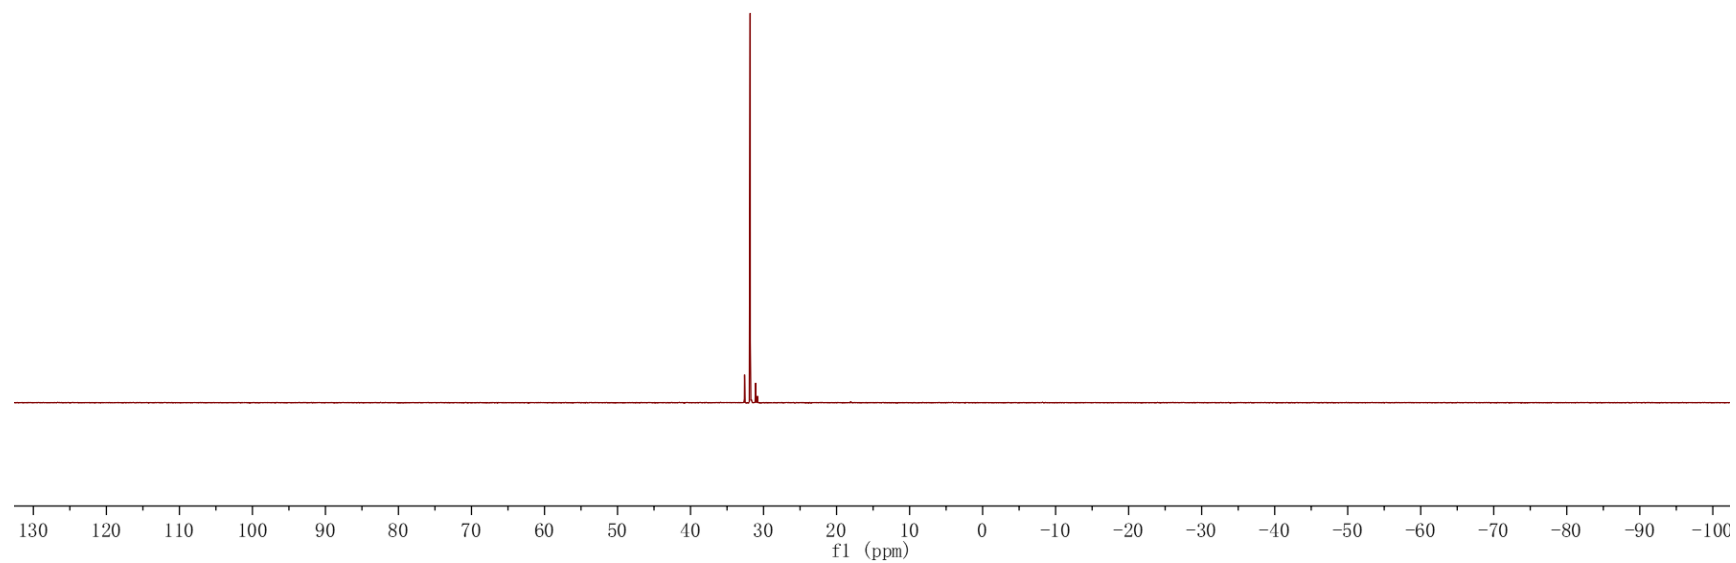

<sup>31</sup>P {<sup>1</sup>H} NMR (CDCl<sub>3</sub>, 162 MHz) of compound **3q**

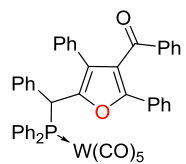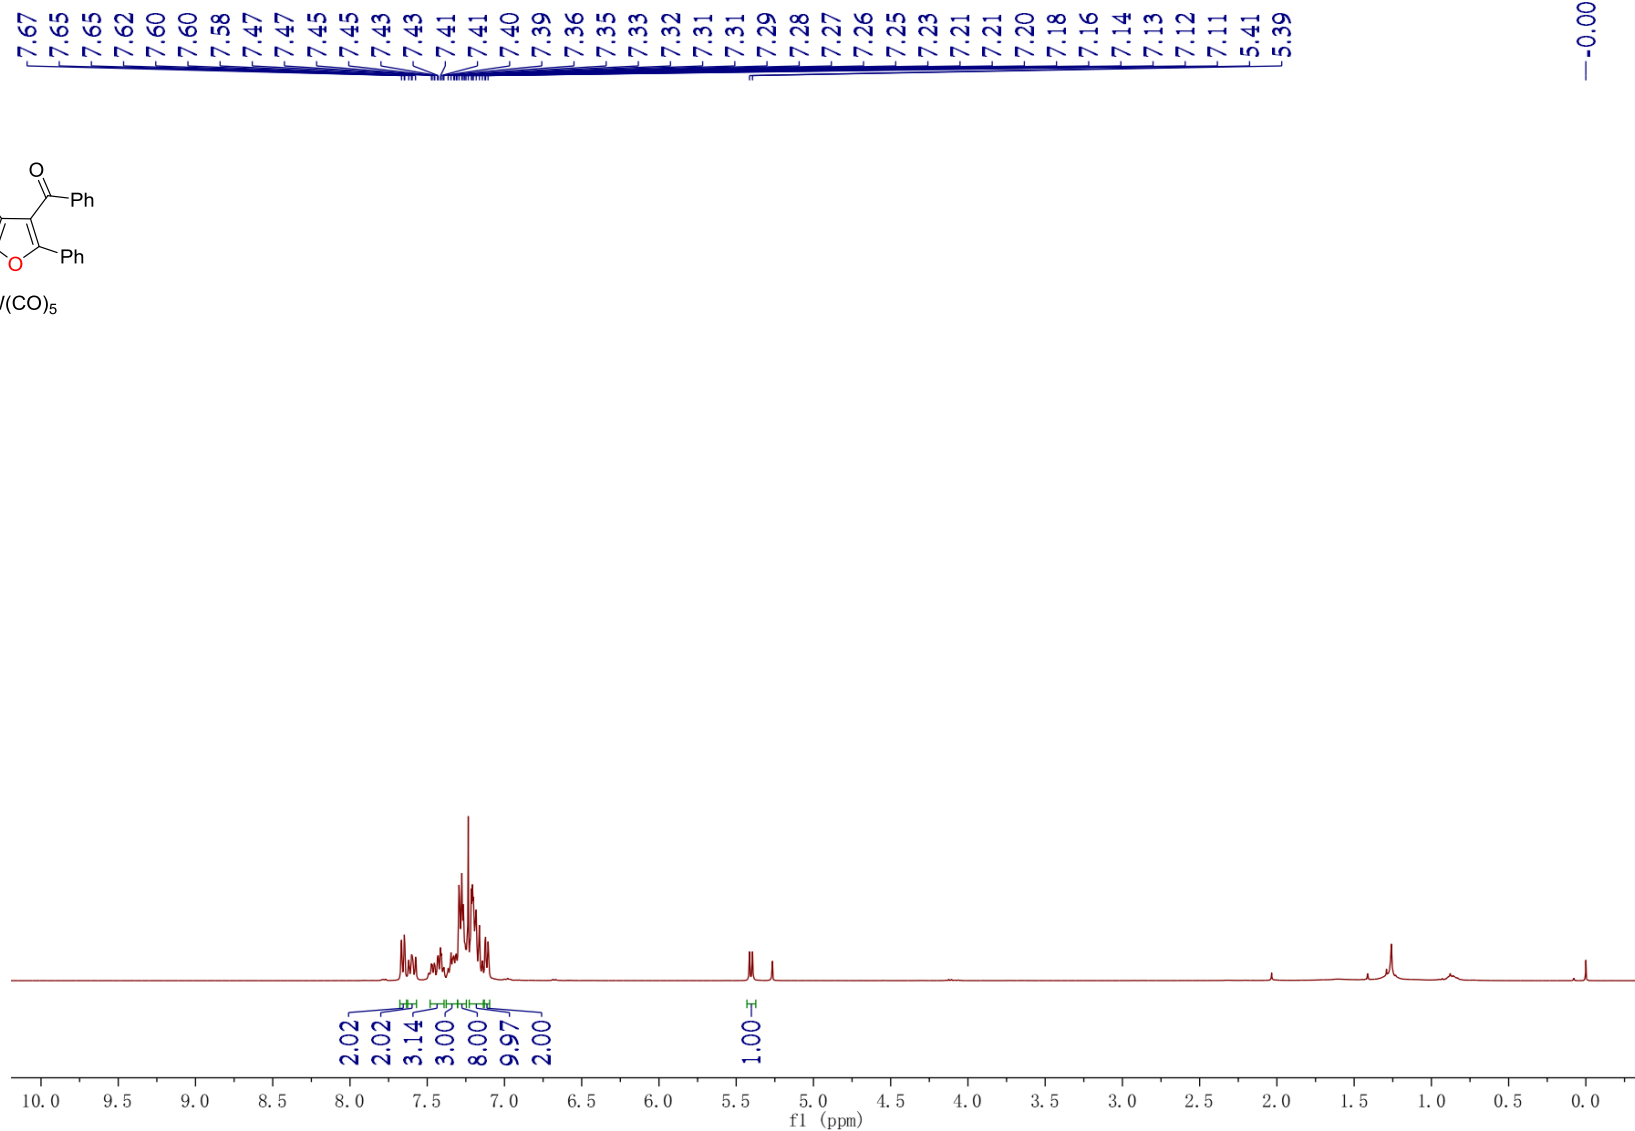

<sup>1</sup>H NMR (CDCl<sub>3</sub>, 400 MHz) of compound **3q**

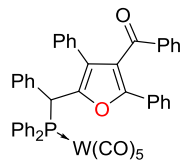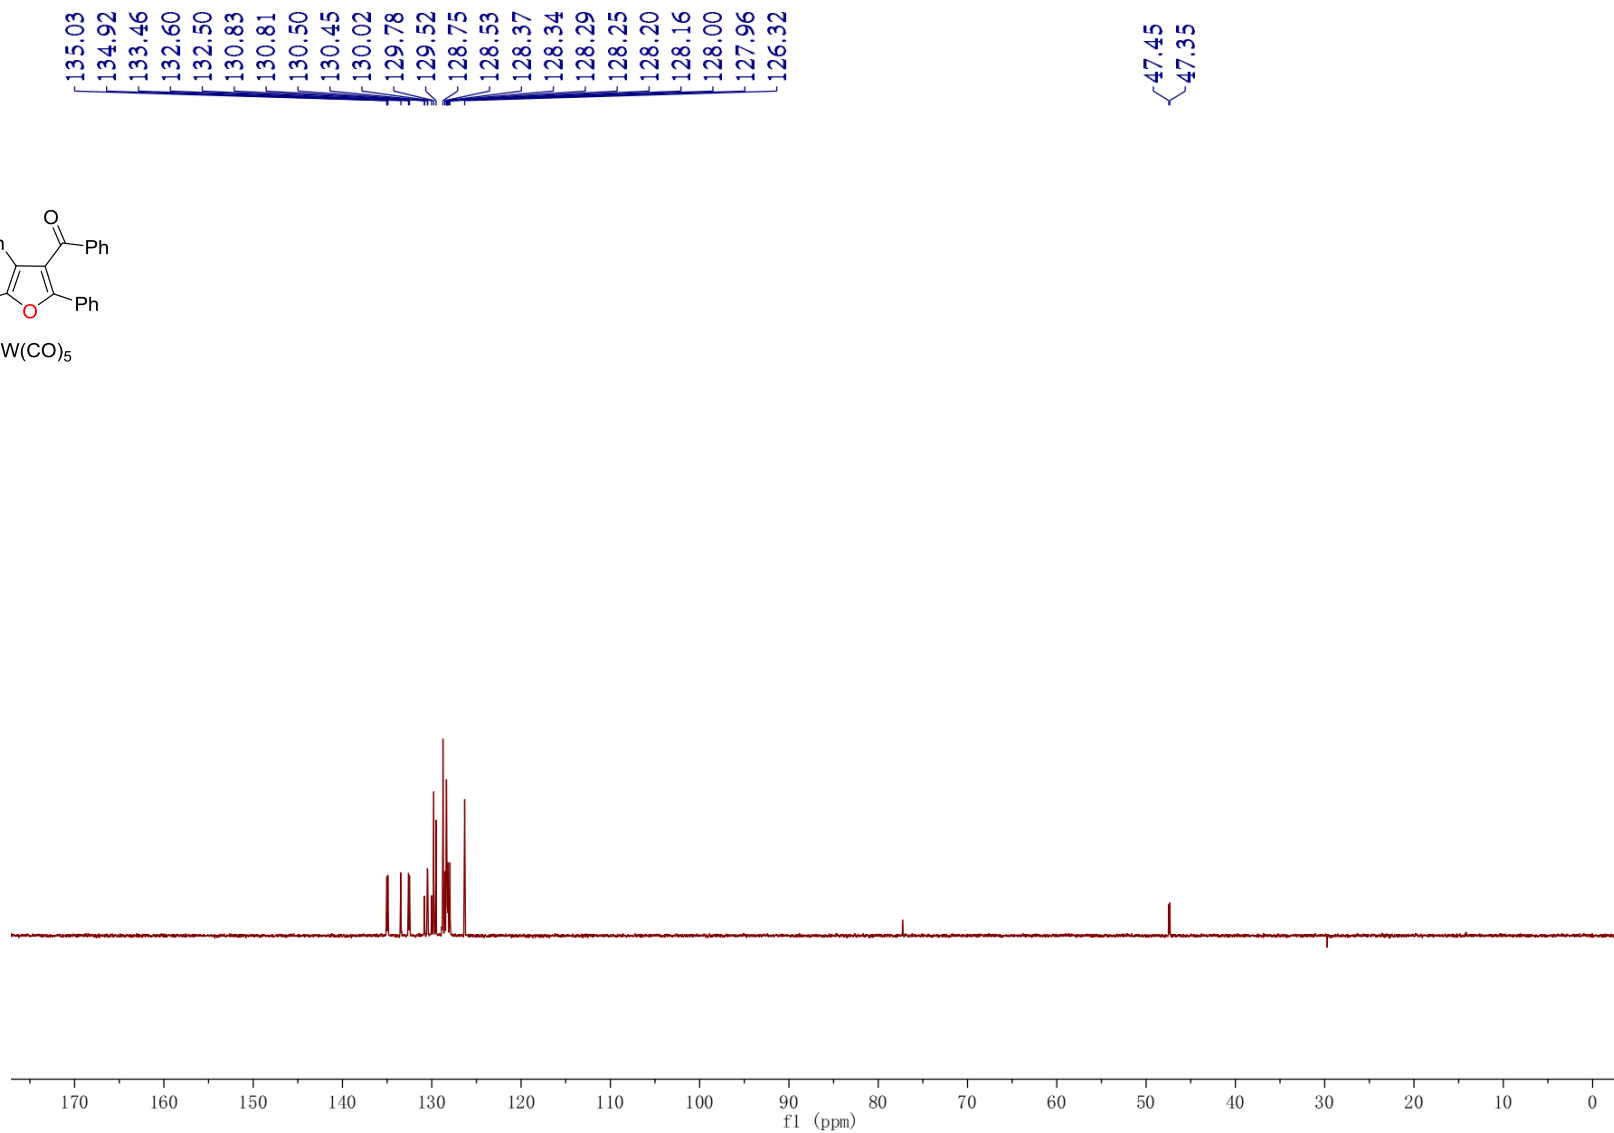

Dept 135 NMR (CDCl<sub>3</sub>, 101 MHz) of Compound **3q**

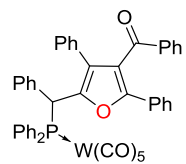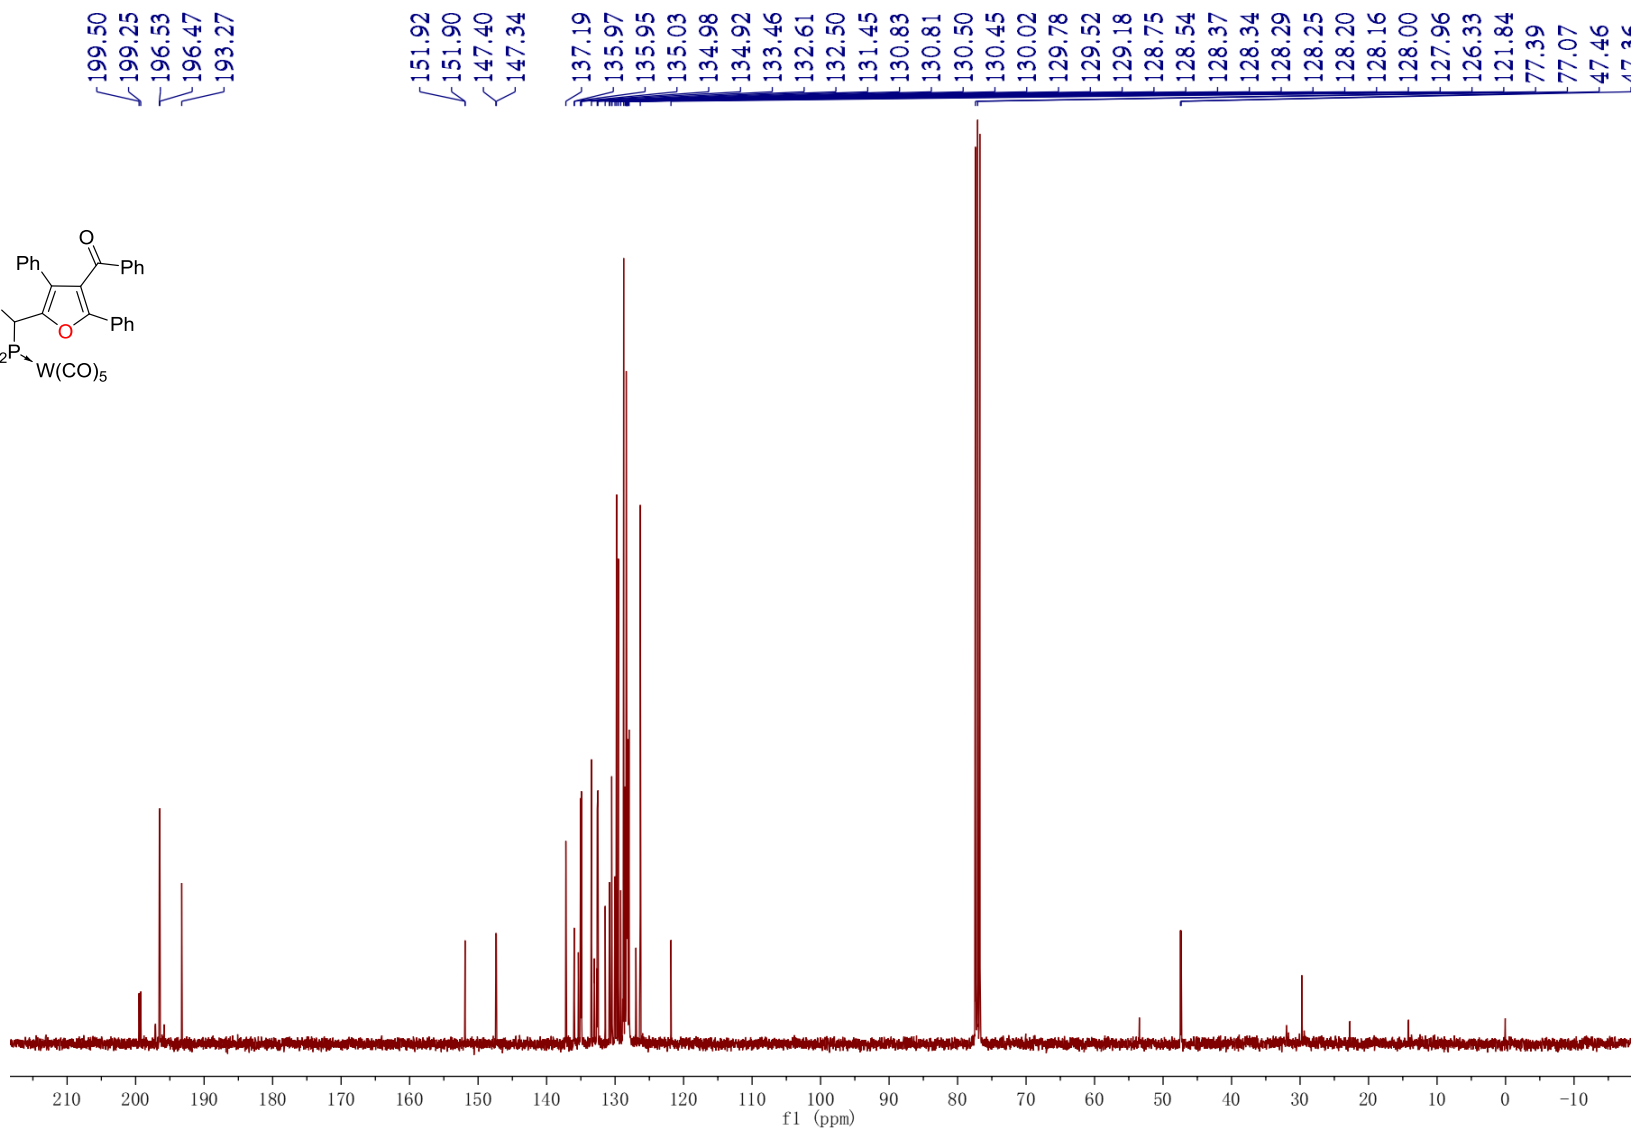

$^{13}\text{C} \{^1\text{H}\}$  NMR ( $\text{CDCl}_3$ , 101 MHz) of compound **3q**



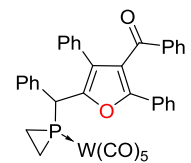

[-174.54  
[-175.60  
[-176.67

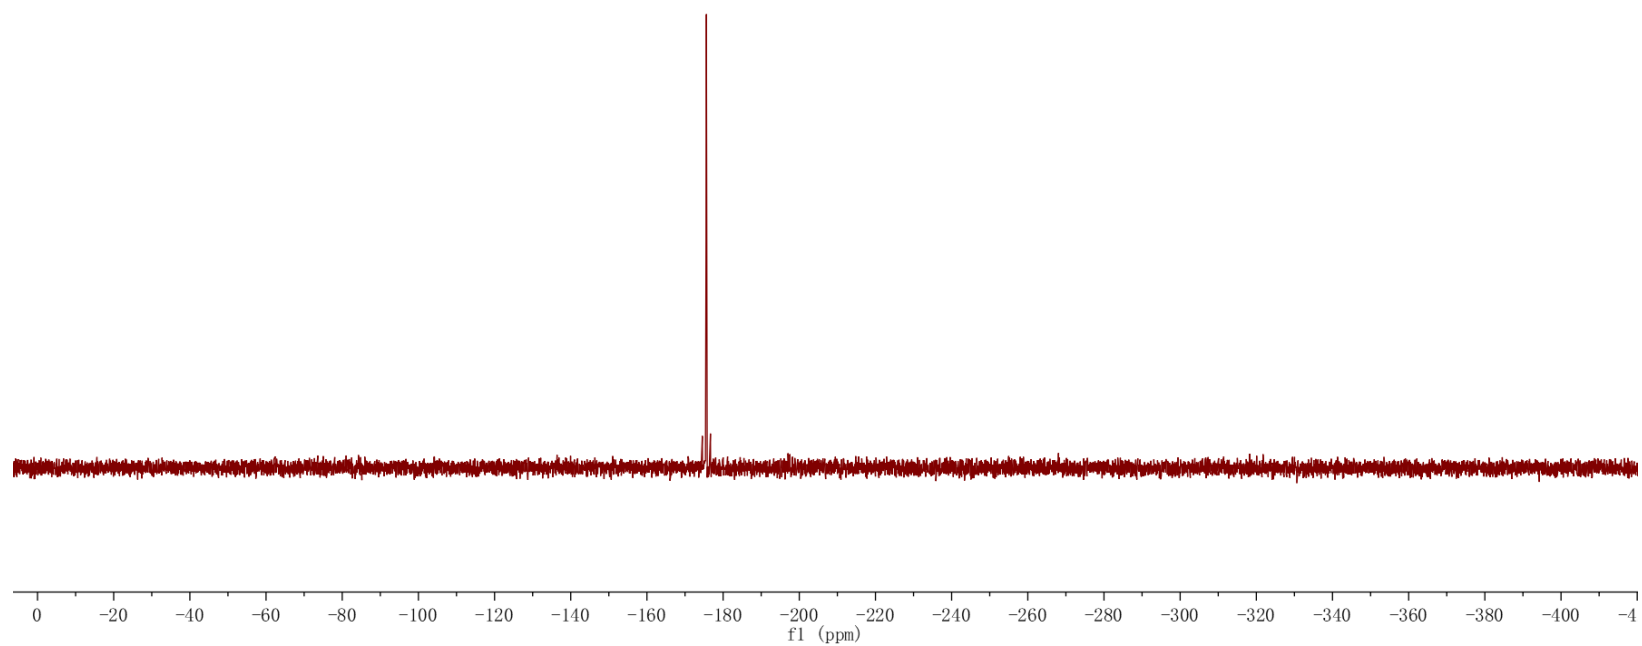

$^{31}\text{P}$  { $^1\text{H}$ } NMR (CDCl<sub>3</sub>, 121 MHz) of compound 3r

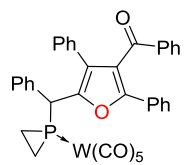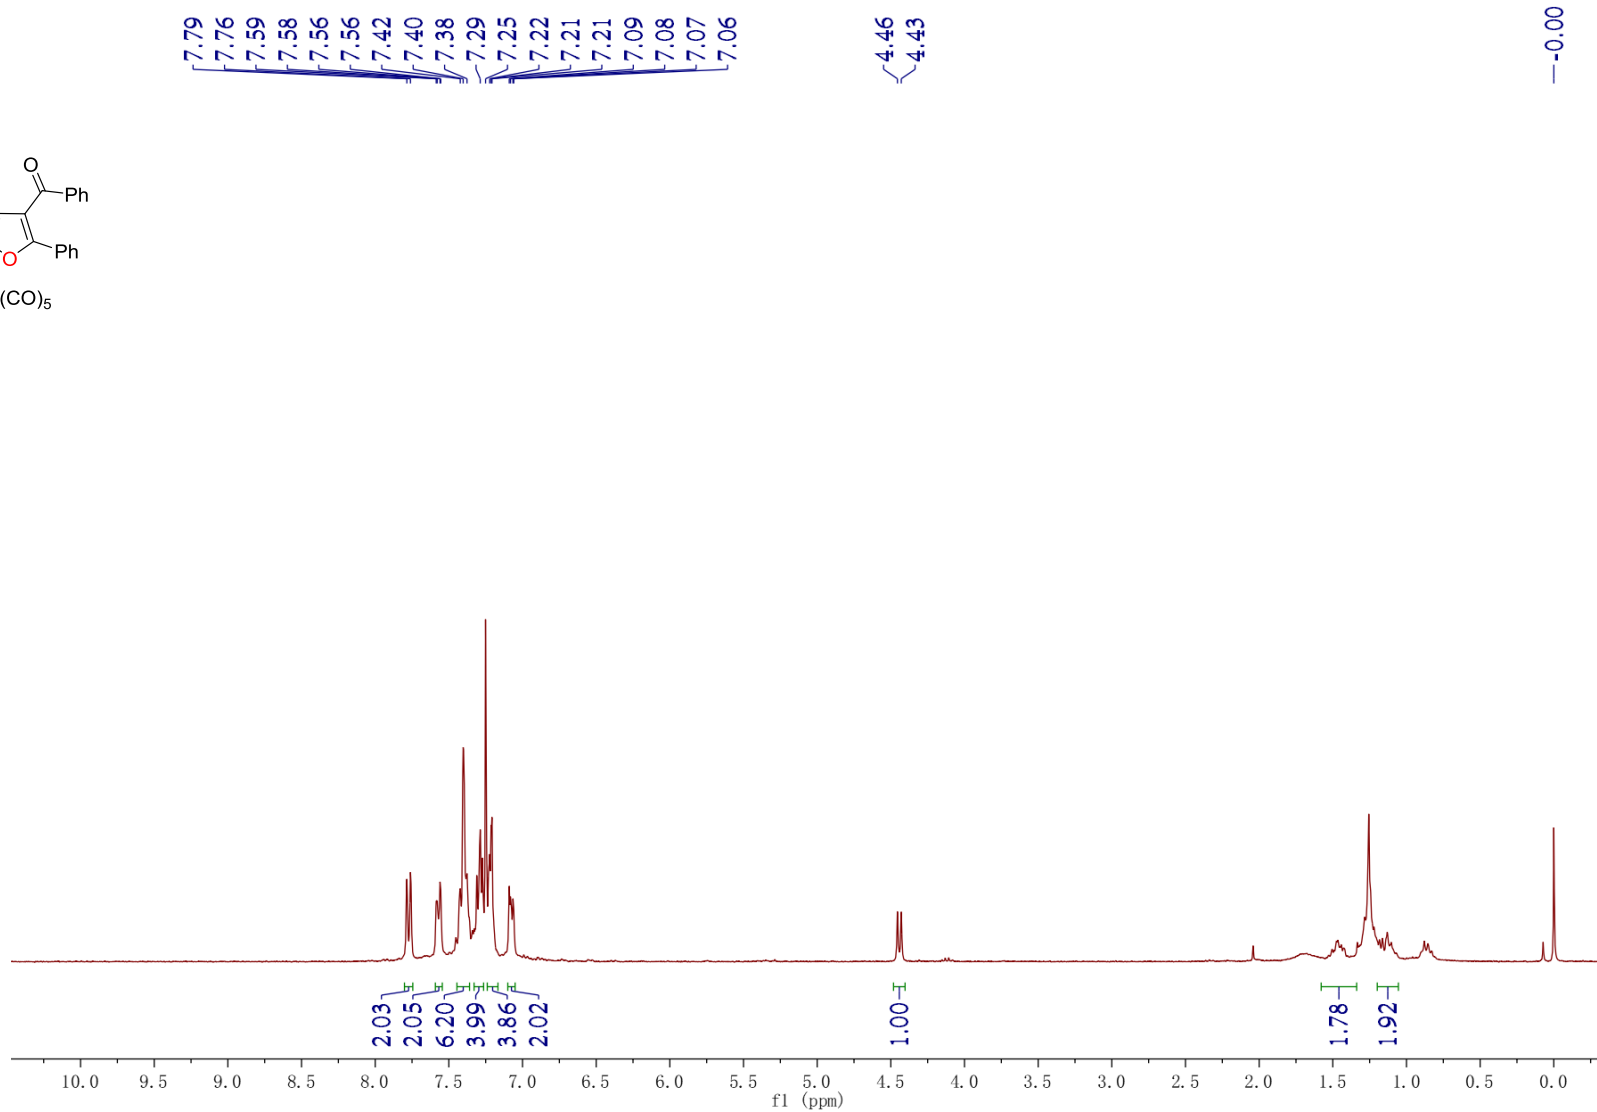

<sup>1</sup>H NMR (CDCl<sub>3</sub>, 400 MHz) of compound **3r**

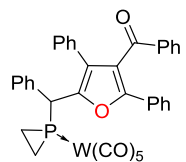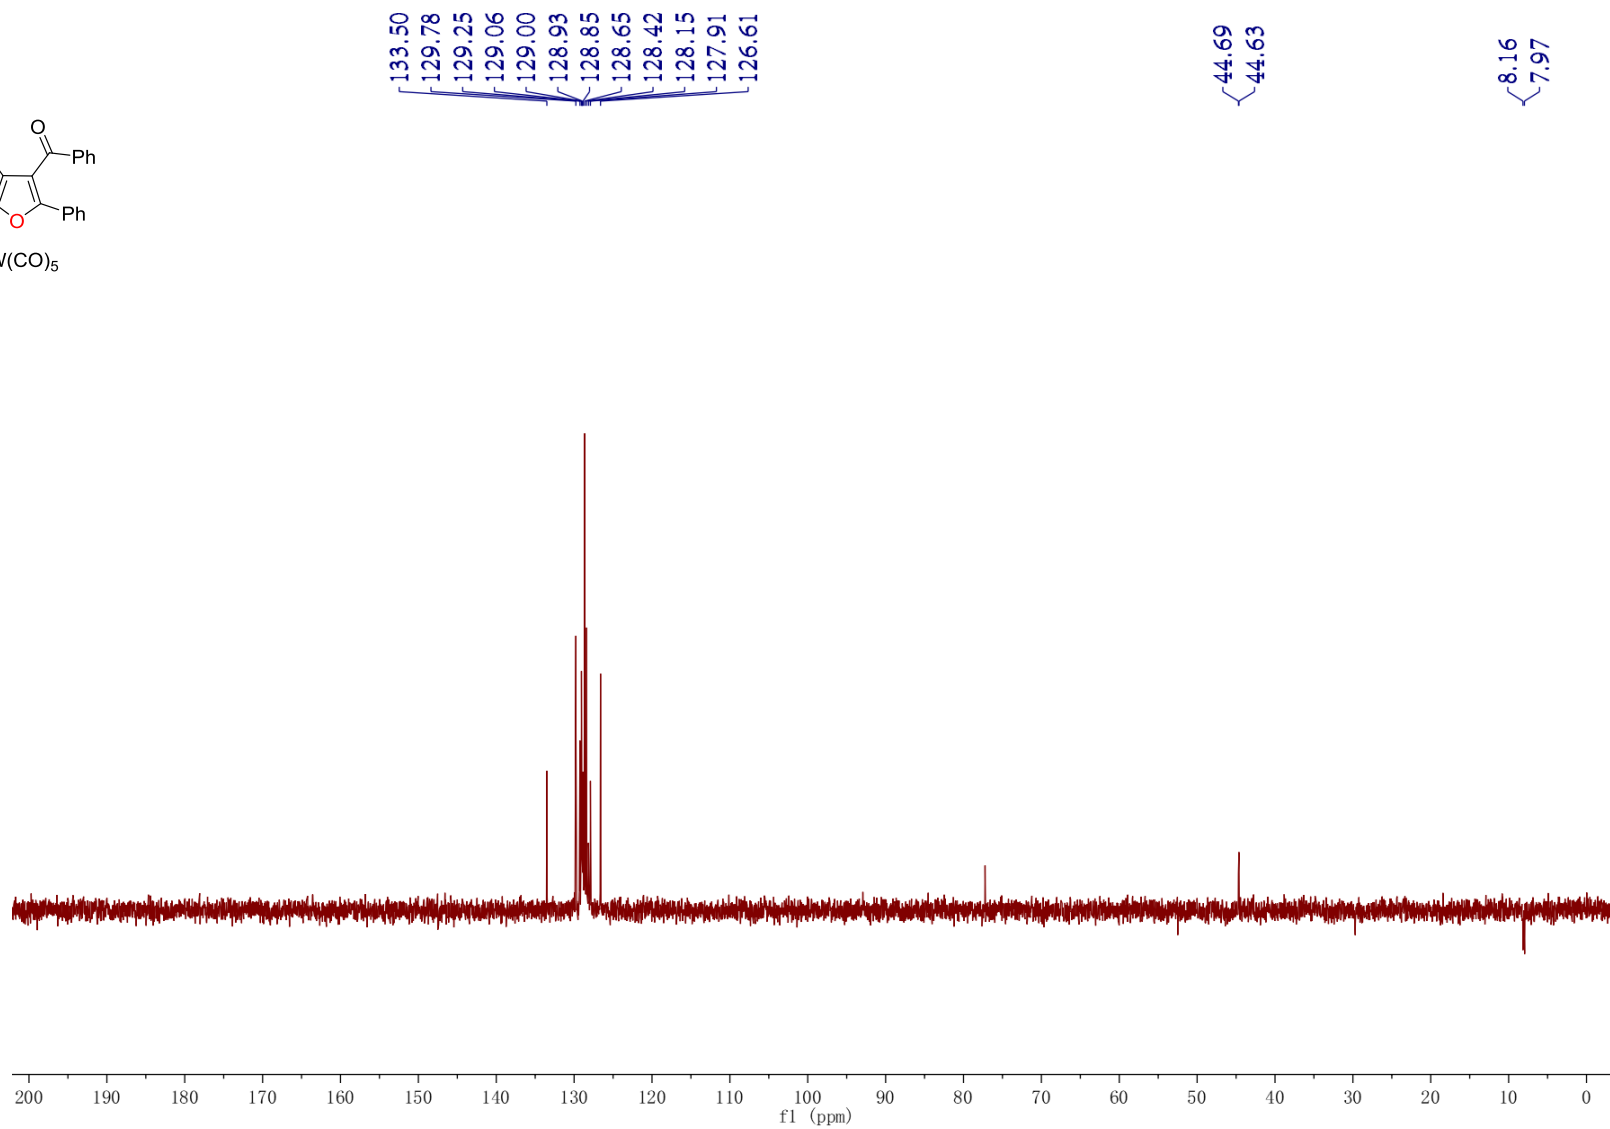

Dept 135 NMR (CDCl<sub>3</sub>, 75 MHz) of Compound 3r

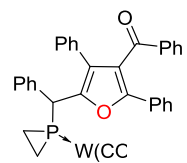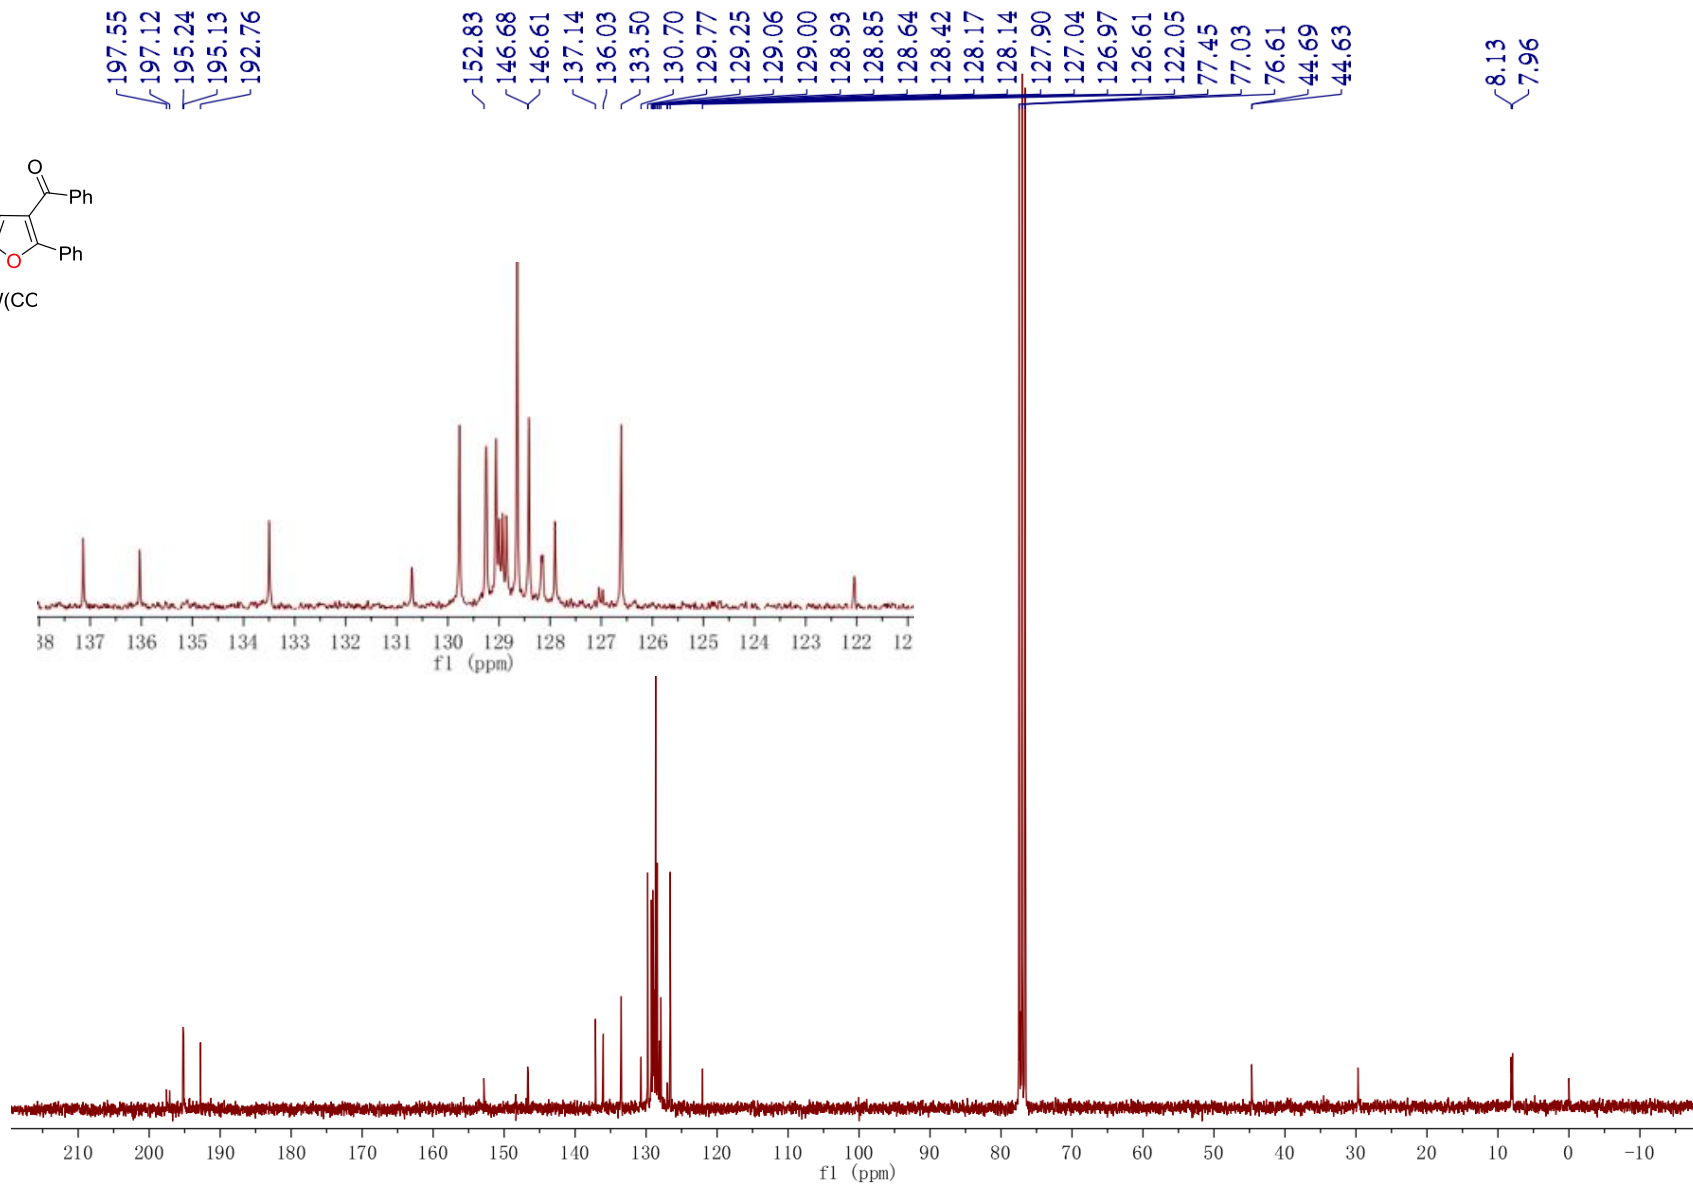

$^{13}\text{C} \{^1\text{H}\}$  NMR ( $\text{CDCl}_3$ , 75 MHz) of compound **3r**

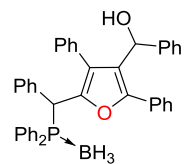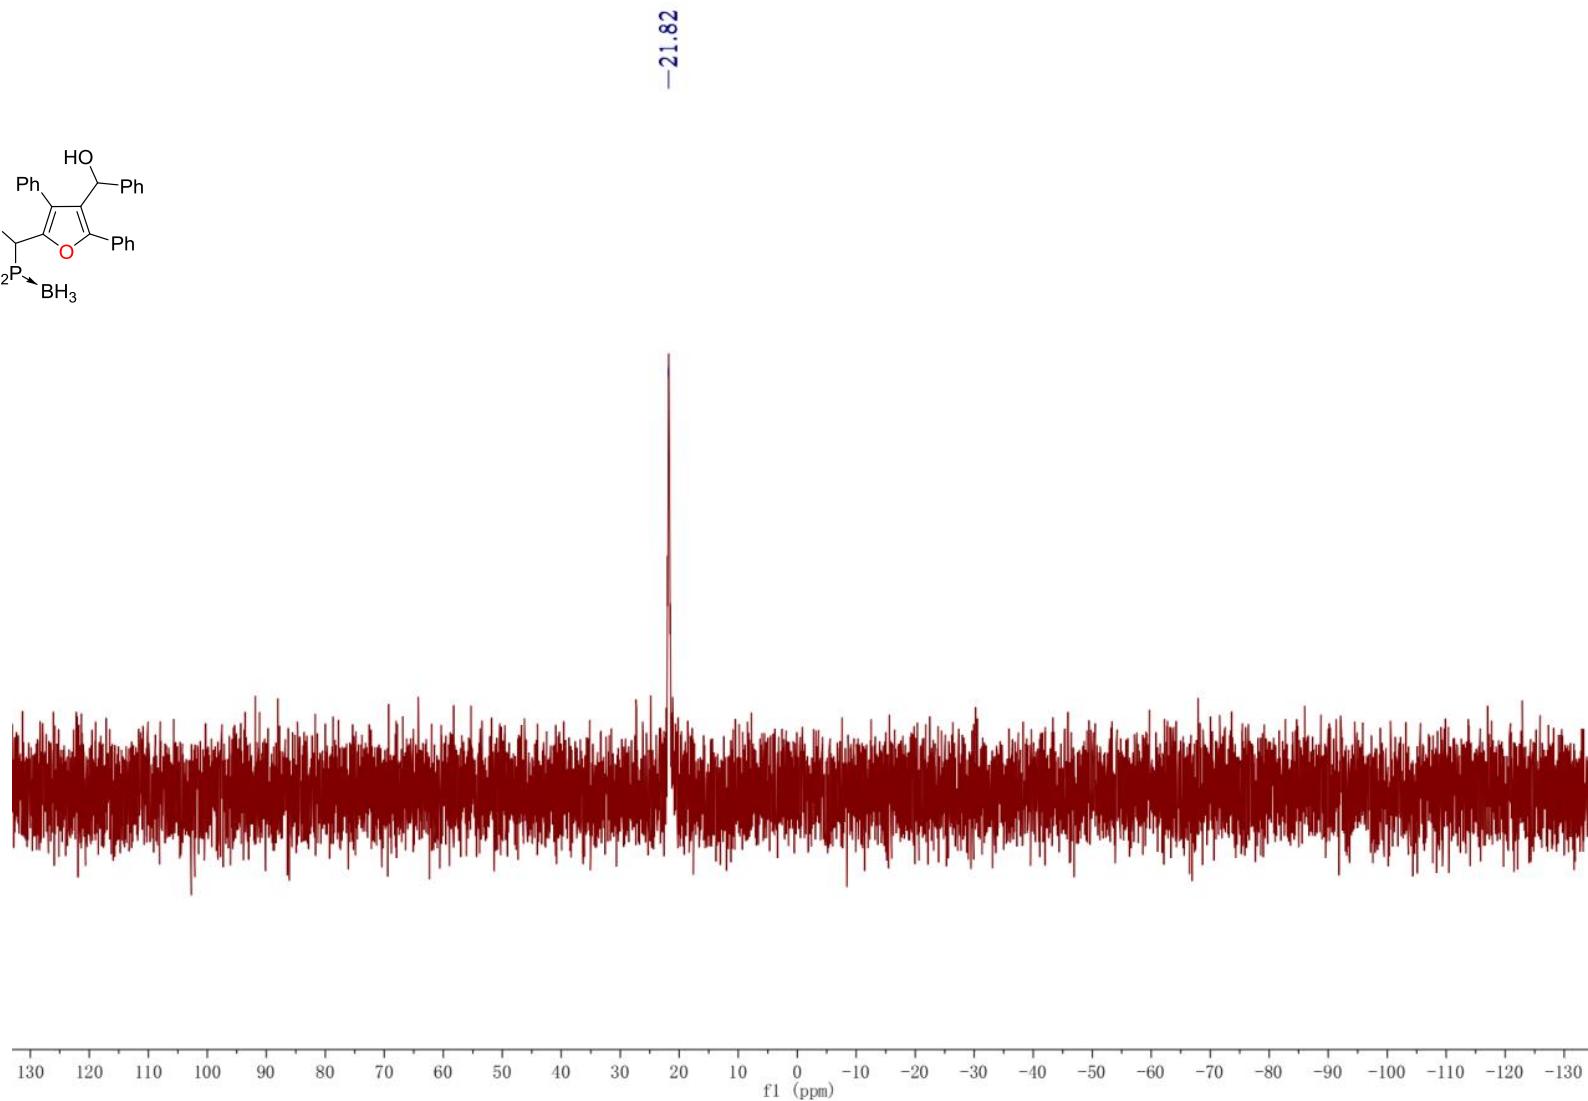

$^{31}\text{P}$  { $^1\text{H}$ } NMR ( $\text{CDCl}_3$ , 121 MHz) of compound 7

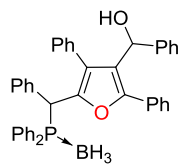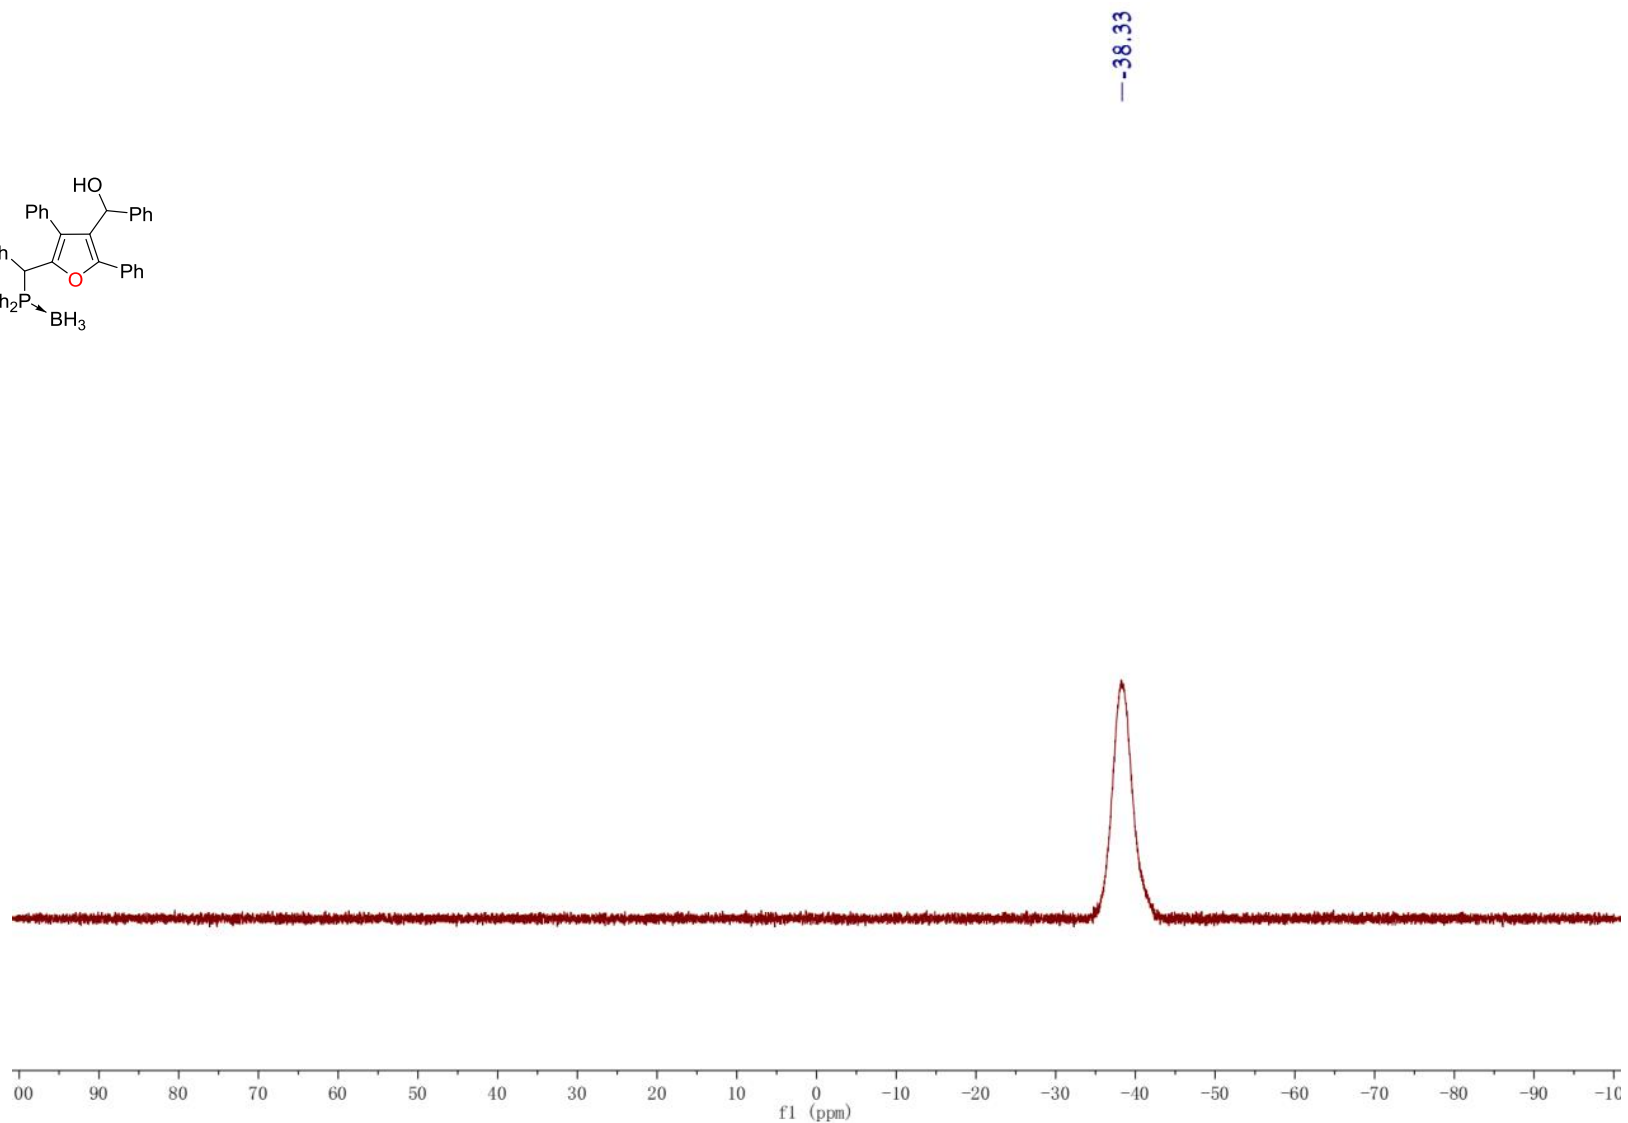

$^{11}\text{B}$   $\{^1\text{H}\}$  NMR ( $\text{CDCl}_3$ , 128 MHz) of compound 7

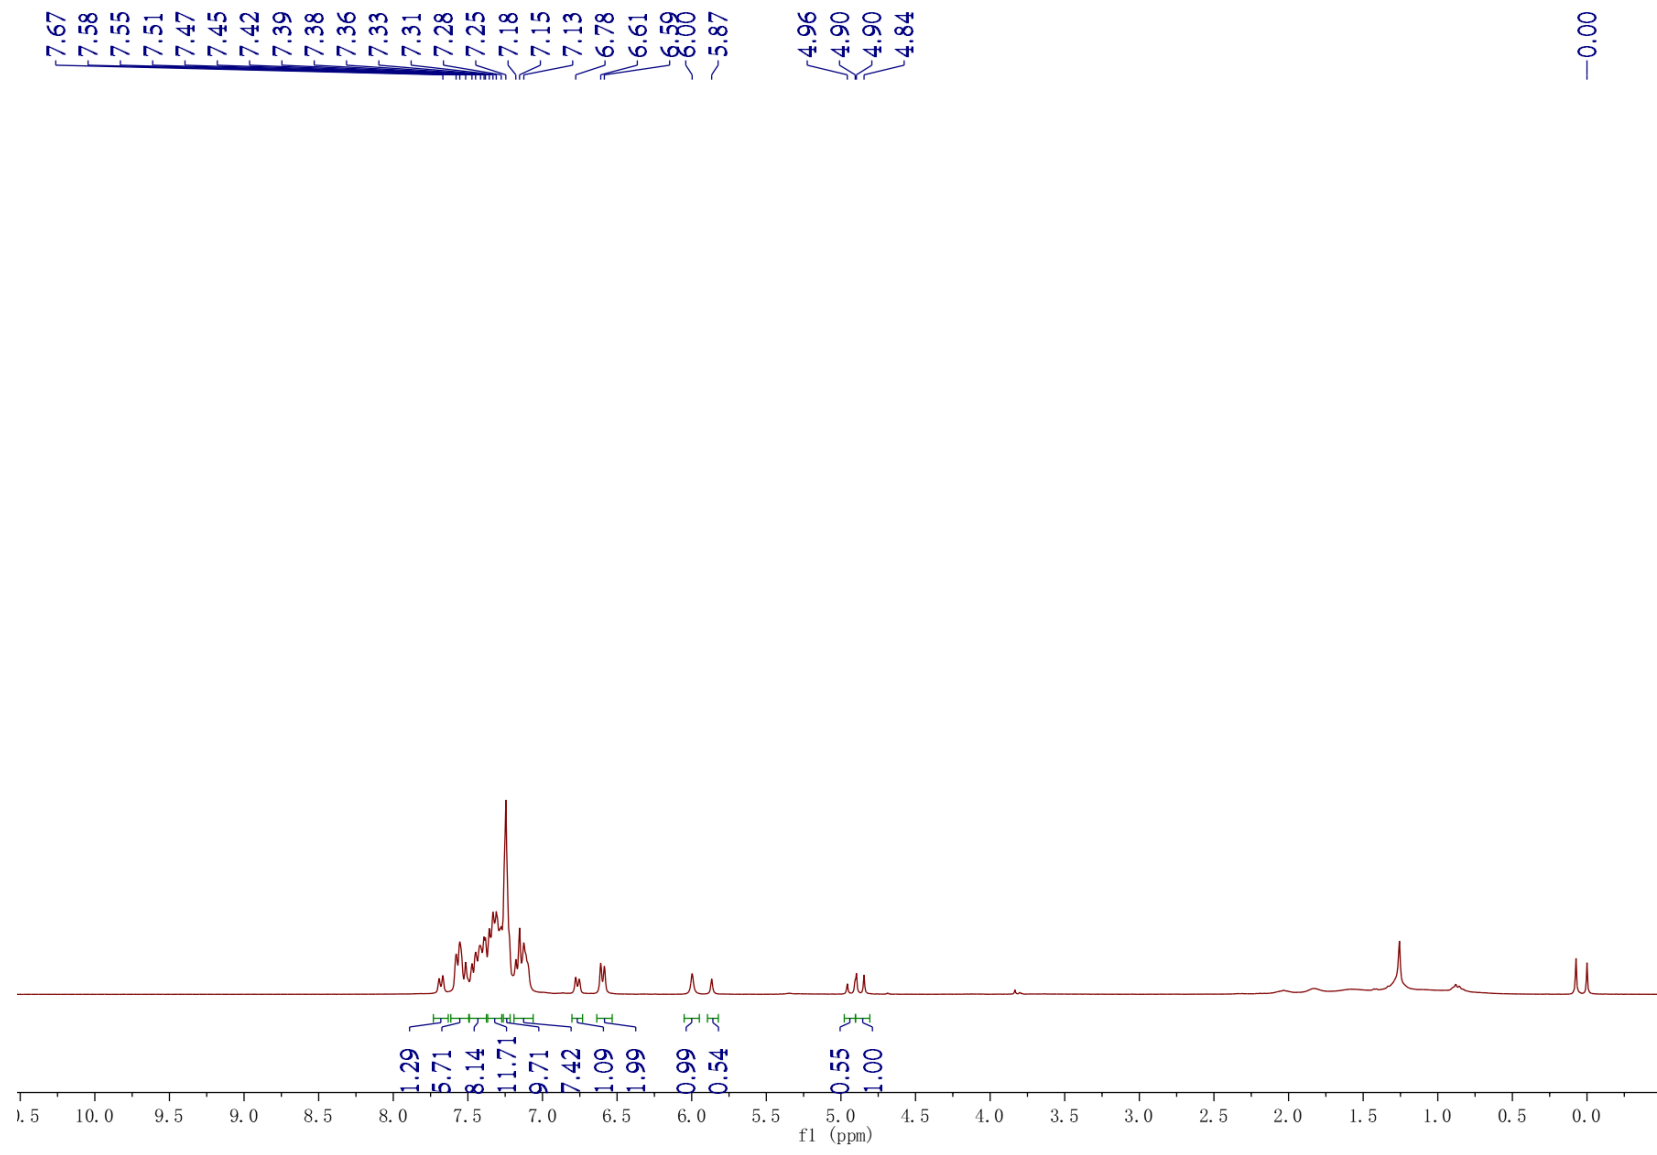

<sup>1</sup>H NMR (CDCl<sub>3</sub>, 300 MHz) of compound 7

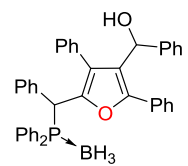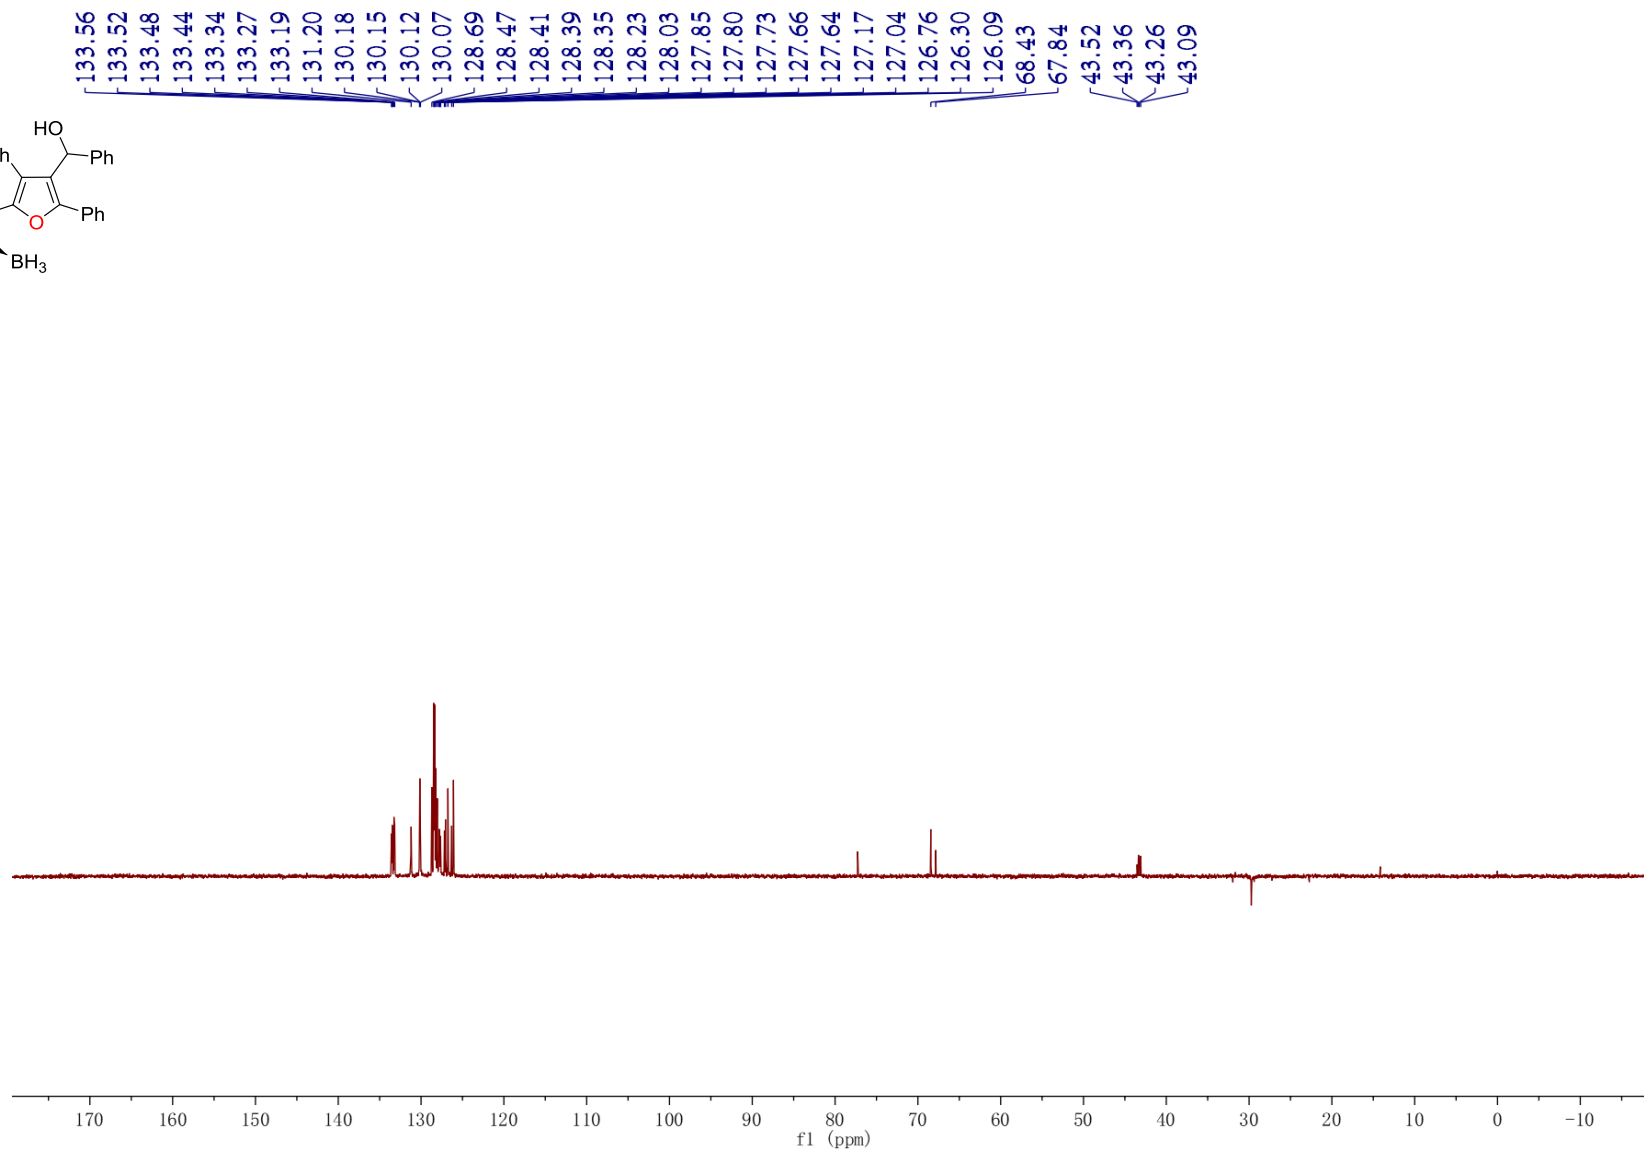

Dept 135 NMR (CDCl<sub>3</sub>, 101 MHz) of compound 7



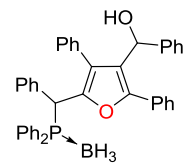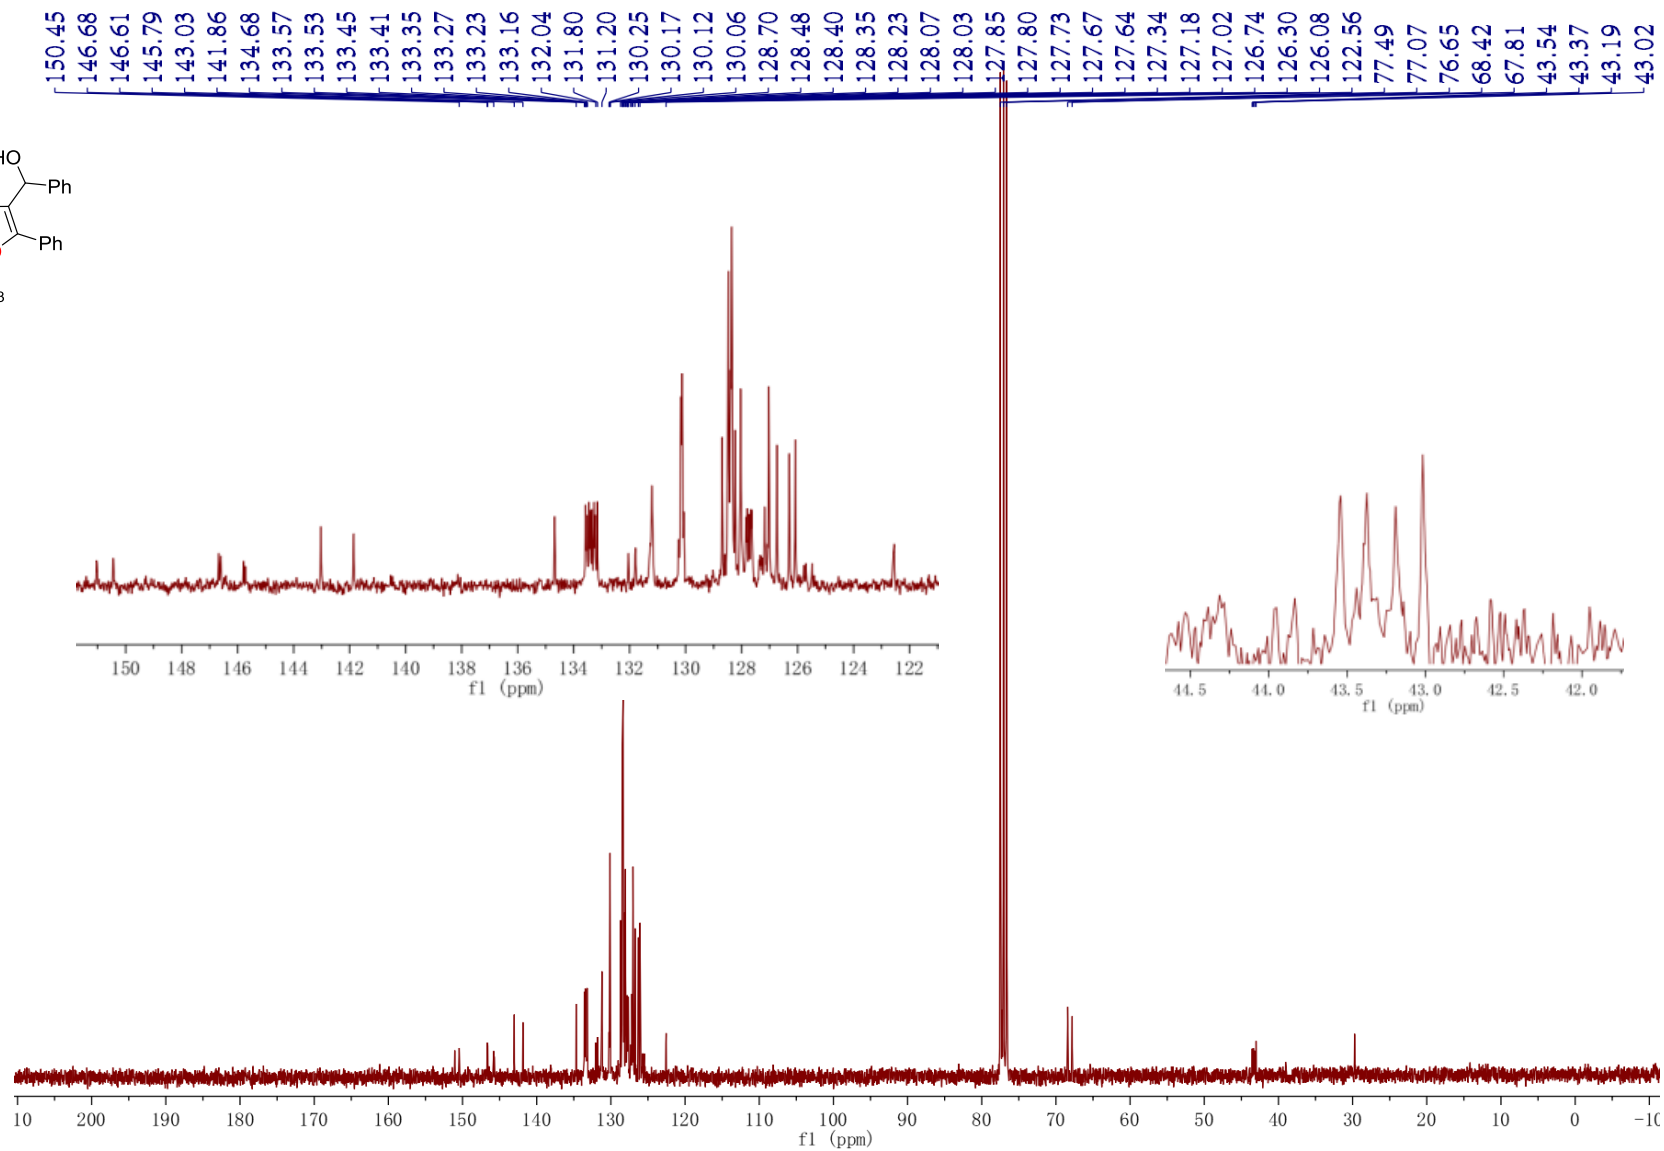

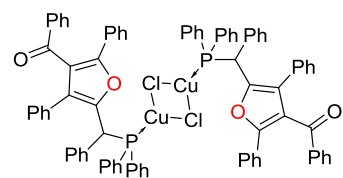

-11.14

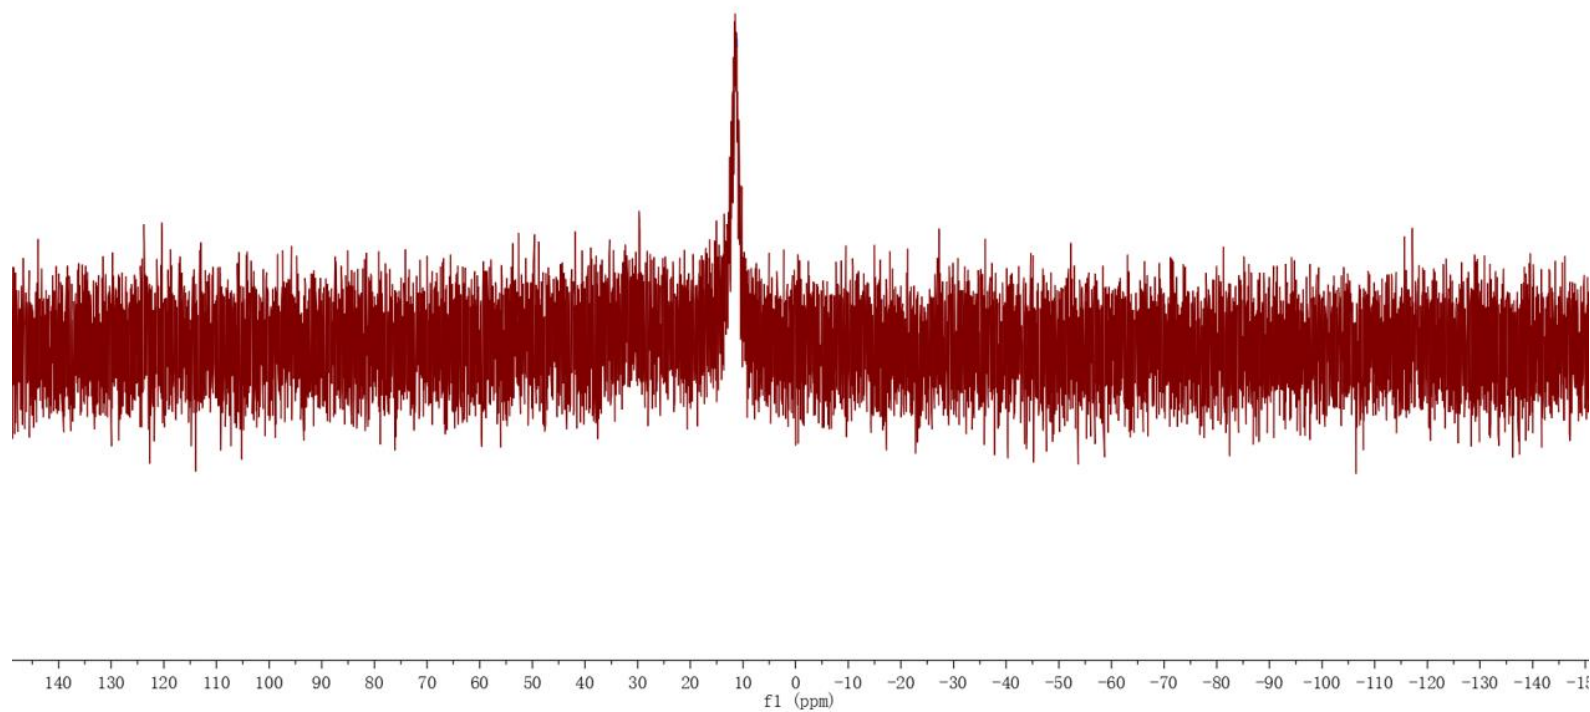

$^{31}\text{P}$   $\{^1\text{H}\}$  NMR ( $\text{CDCl}_3$ , 162 MHz) of compound **9**

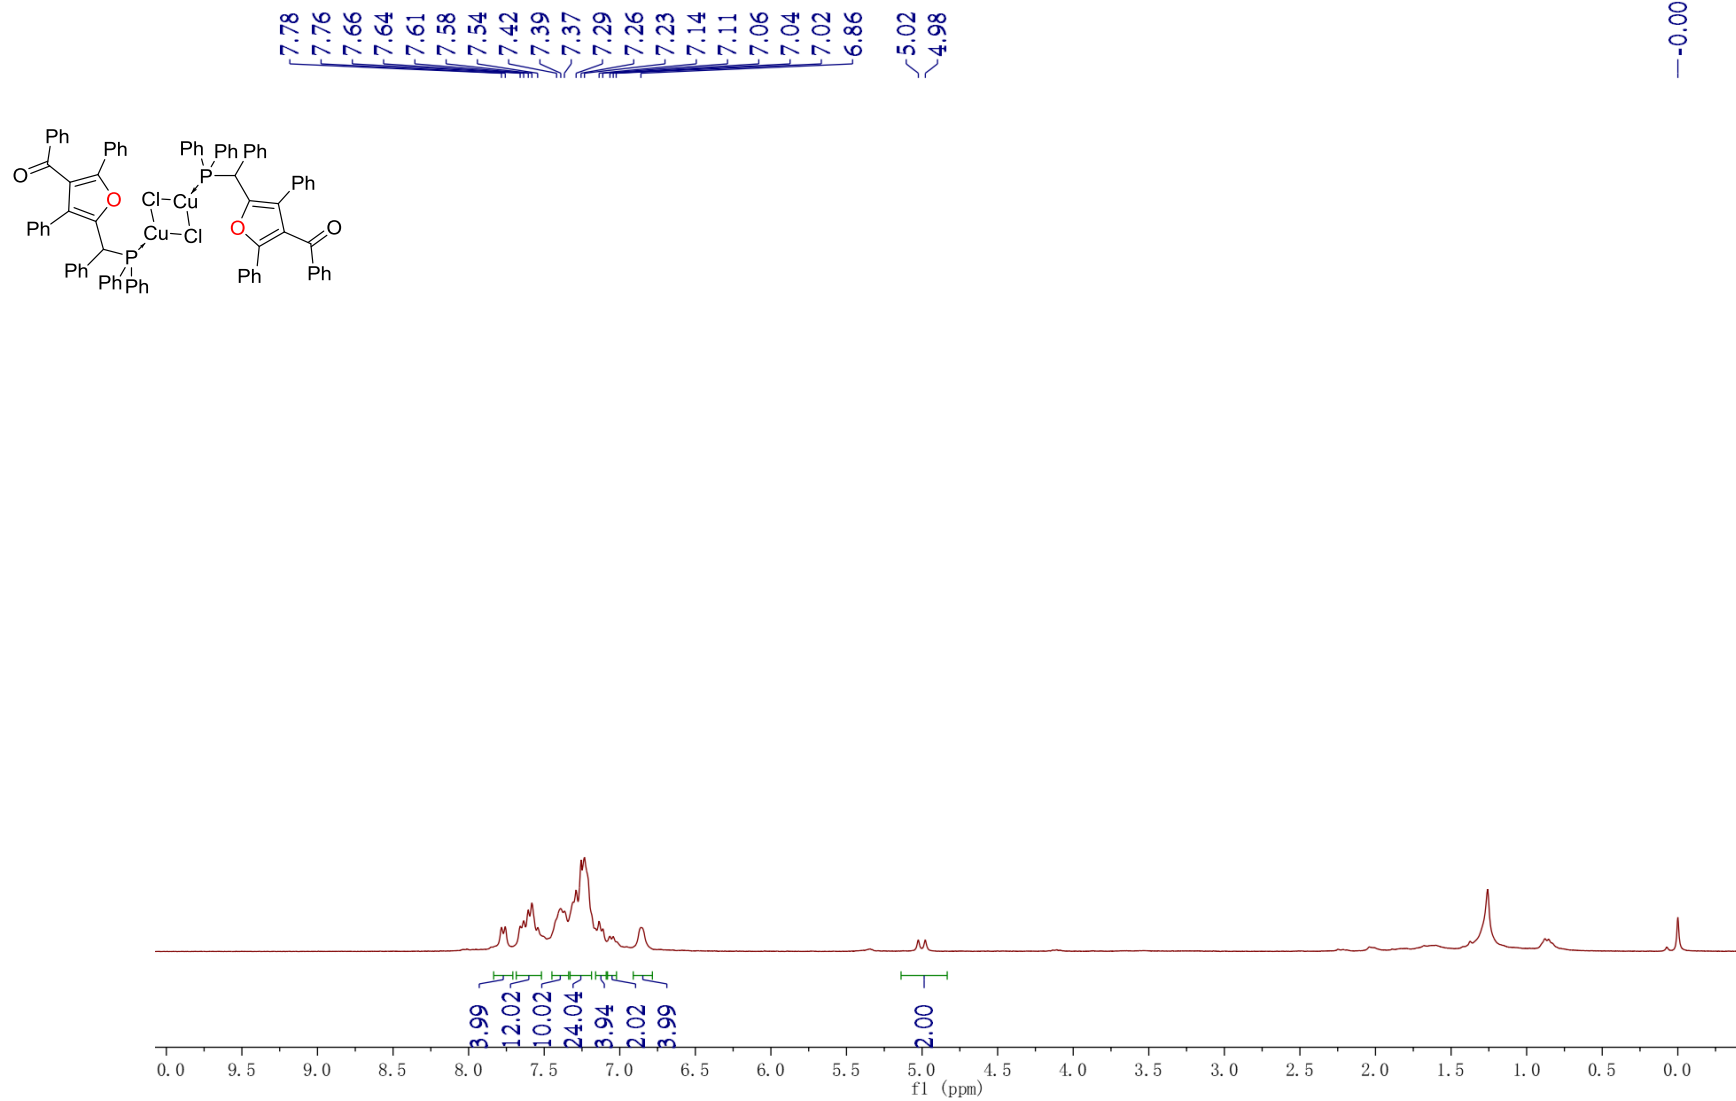

$^1\text{H}$  NMR ( $\text{CDCl}_3$ , 300 MHz) of compound **9**
